# Supplementary material for: Cooperative catalytic methoxycarbonylation of alkenes: uncovering the role of palladium complexes with hemilabile ligands
Source: Royal Society of Chemistry journal article supplement (doi:10.1039/c7sc02964k), 2018-01-01

**Cooperative Catalytic Methoxycarbonylation of Alkenes: Uncovering the Role of Palladium Complexes with Hemilabile Ligands**

**Table of Contents**

|                                                                                           |    |
|-------------------------------------------------------------------------------------------|----|
| <b>1. General information</b> .....                                                       | 2  |
| <b>2. Kinetic analysis on Pd/L2-catalyzed methoxycarbonylation of ethylene</b> .....      | 3  |
| <b>3. Characterization of catalytic intermediates</b> .....                               | 15 |
| <b>4. DFT calculation</b> .....                                                           | 18 |
| <b>5. Alkoxy carbonylation of various alkenes with ferrocenyl phosphine ligands</b> ..... | 60 |
| <b>6. References</b> .....                                                                | 62 |
| <b>7. Spectra of the carbonylation products (Figure S12)</b> .....                        | 62 |

## 1. General information

Air- and moisture-sensitive reactions were performed under argon atmosphere. Chemicals were purchased from Aldrich, TCI, Alfa, Acros, or Strem. Unless otherwise noted, all commercial reagents were used without further purification.

The isolated esters were characterized by  $^1\text{H}$  NMR and  $^{13}\text{C}$  NMR spectroscopy, which were recorded on Bruker Avance 300 (300 MHz) NMR spectrometers. Chemical shifts  $\delta$  (ppm) are given relative to solvent: references for  $\text{CDCl}_3$  were 7.26 ppm ( $^1\text{H}$ -NMR) and 77.16 ppm ( $^{13}\text{C}$ -NMR).  $^{13}\text{C}$ -NMR spectra were acquired on a broad band decoupled mode. Multiplets were assigned as s (singlet), d (doublet), t (triplet), dd (doublet of doublet), m (multiplet) and br (broad singlet). ESI (electrospray ionization) mass spectrum was recorded on an Agilent Technologies 6210 TOF LC/MS using methanol (100%) as eluent. GC analysis was performed on a Agilent 7890A chromatograph with a 29 m HP5 column.

Data were collected on a Bruker Kappa APEX II Duo diffractometer. The structures were solved by direct methods (SHELXS-97: Sheldrick, G. M. *Acta Crystallogr.* **2008**, *A64*, 112.) and refined by full-matrix least-squares procedures on  $F^2$  (SHELXL-2014: G. M. Sheldrick, *Acta Crystallogr.* **2015**, *C71*, 3.). XP (Bruker AXS) was used for graphical representations.

## 2. Kinetic analysis on Pd/L2-catalyzed methoxycarbonylation of ethylene

The comparison between ligands **L2** and **L1** in the palladium catalyzed methoxycarbonylation of ethylene at room temperature was studied previously (*Angew. Chem. Int. Ed.*, **2017**, 56, 5267-5271):

- (a) reaction conditions: Pd(acac)<sub>2</sub> (6.5 mg, 0.04 mol%), **L1** or **L2** (0.16 mol%), PTSA (61 mg, 0.6 mol%), CO (30 bar), MeOH (20 mL), ethylene (1.5 g, 53.6 mmol), 23 °C.

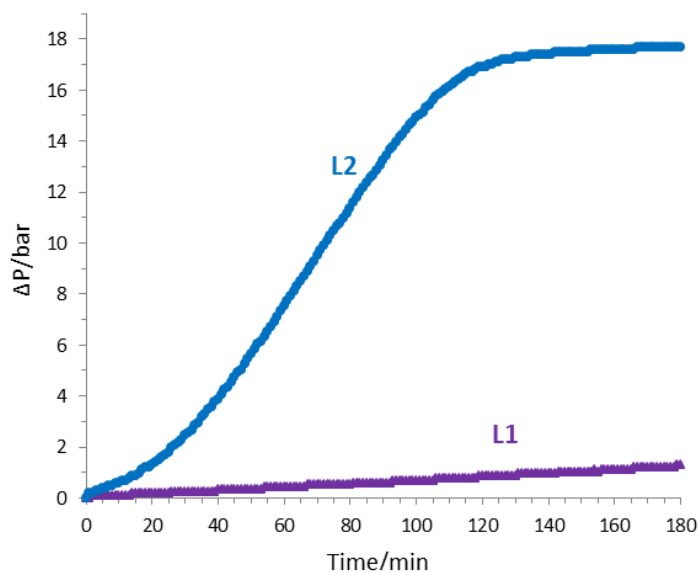

- (b) Reaction conditions: PdCl<sub>2</sub> (2.53 mg, 0.04 mol%), **L1** or **L2** (0.16 mol%), MeOH (5 mL), ethylene (1.0 g, 35.7 mmol), CO (30 bar), 80 °C.

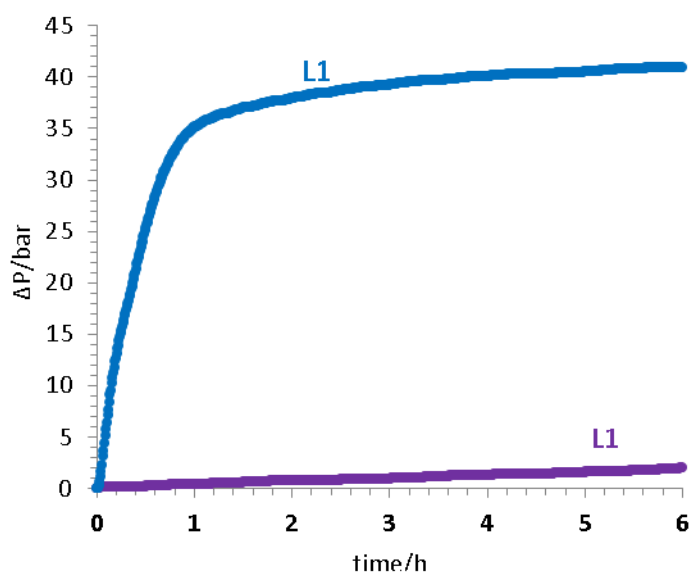

**General procedure:** In these studies, the concentration of ethylene was calculated by gas consumption of CO and ethylene, which was monitored on line automatically. Under argon atmosphere, a 100 mL steel autoclave was charged with [Pd<sub>2</sub>(dba)<sub>3</sub>·CHCl<sub>3</sub>], ligand **L2**, and *p*-toluenesulfonic acid (PTSA). Methanol (20 mL) was injected into the autoclave by syringe. Then ethylene was introduced into the autoclave (mass control by balance). When the reaction mixture was reached to the desired temperature, CO was introduced into the autoclave and the reaction was carried out at this temperature. After the reaction was completed, the autoclave was cooled to room temperature and depressurized slowly. The content was transferred to a 50 mL Schlenk flask and isooctane (internal standard) was added into the solution. The yield and chemo-selectivity was measured by GC analysis.

**2.1. Effect of palladium precursors.** Reaction conditions:  $[\text{Pd}_2(\text{dba})_3\cdot\text{CHCl}_3]$  (11.1 mg, 0.0107 mmol, 0.0214 mmol Pd) or  $\text{Pd}(\text{acac})_2$  (6.5 mg, 0.0214 mmol), **L2** (44.3 mg, 0.0858 mmol), PTSA (65.2 mg, 0.3432 mmol), MeOH (20 mL), ethylene (1.5 g), CO (30 bar), 23 °C.

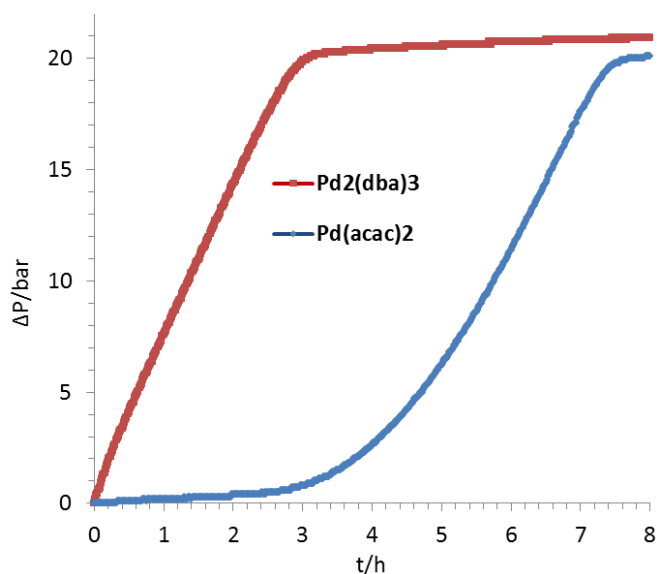

**Figure S1.** Effect of palladium precursors on ethylene methoxycarbonylation.

**2.2. Effect of the amount of ligand L2.** Reaction conditions:  $[\text{Pd}_2(\text{dba})_3\cdot\text{CHCl}_3]$  (11.1 mg, 0.0107 mmol, 0.0214 mmol Pd), **L2** (11.1-44.3 mg, 0.0215-0.0858 mmol), PTSA (65.2 mg, 0.3432 mmol), MeOH (20 mL), ethylene (1.5 g), CO (30 bar), 23 °C.

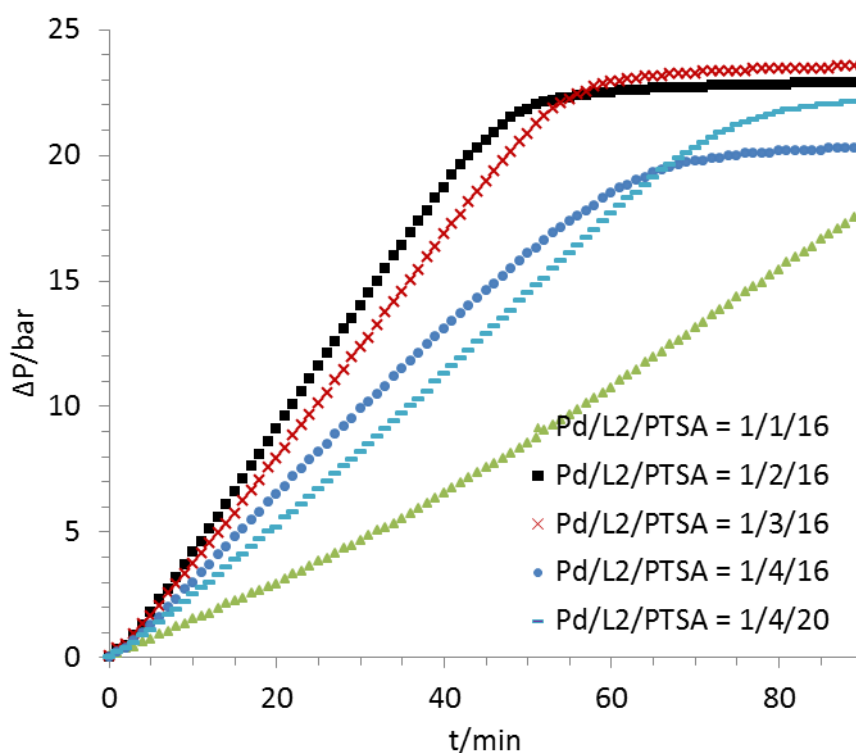

**Figure S2.** Gas consumption of CO and ethylene versus reaction time: effect of ligand **L2** concentration.

**2.3. Effect of the acid concentration.** Reaction conditions:  $[\text{Pd}_2(\text{dba})_3\cdot\text{CHCl}_3]$  (11.1 mg, 0.0107 mmol, 0.0214 mmol Pd), **L2** (22.2 mg, 0.0430 mmol), PTSA (32.6-121.4 mg, 0.1716-0.6390 mmol), MeOH (20 mL), ethylene (1.5 g), CO (30 bar), 23 °C.

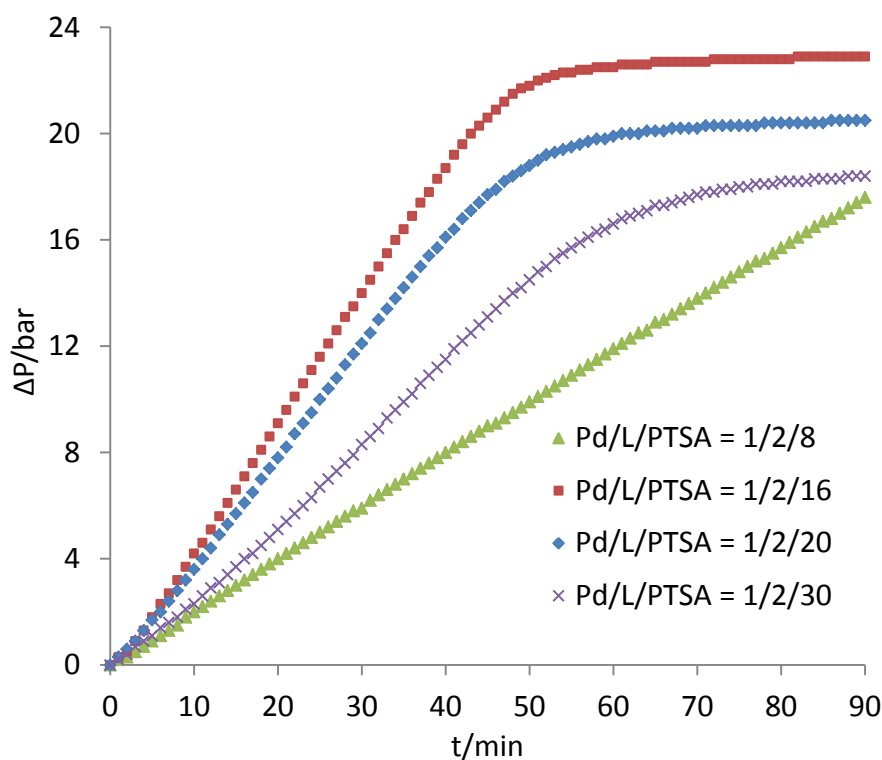

**Figure S3.** Gas consumption of CO and ethylene versus reaction time: effect of the amount of PTSA.

**2.4. Effect of the amount of ethylene.** Reaction conditions:  $[\text{Pd}_2(\text{dba})_3\cdot\text{CHCl}_3]$  (11.1 mg, 0.0107 mmol, 0.0214 mmol Pd), **L2** (22.2 mg, 0.0430 mmol), PTSA (65.2 mg, 0.3432 mmol), MeOH (20 mL), ethylene (1-2.5 g, 35.7-89.3 mmol), CO (30 bar), 23 °C.

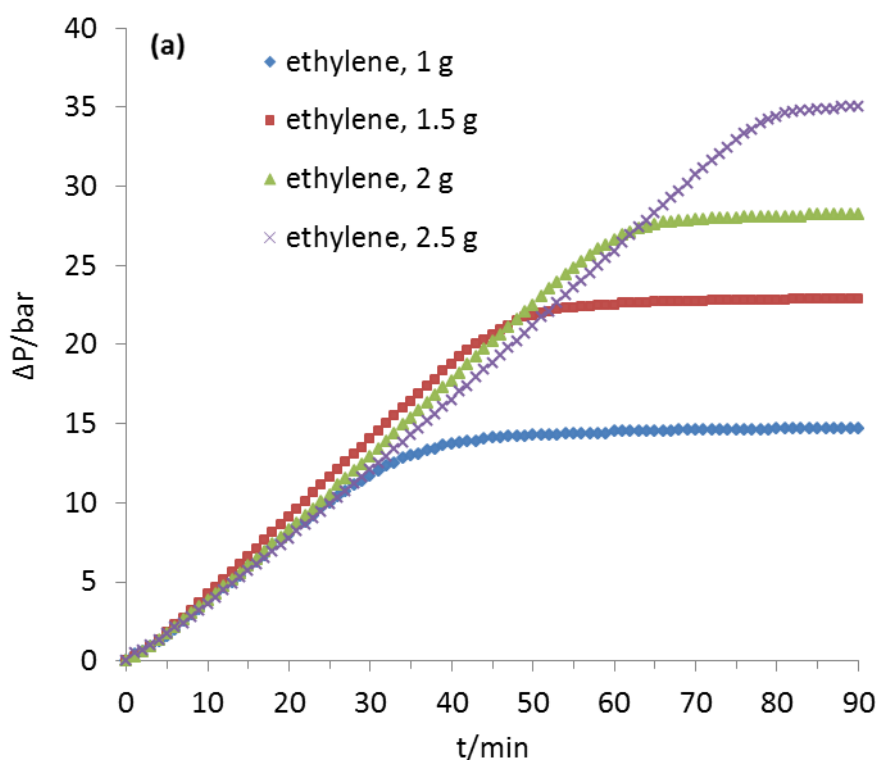

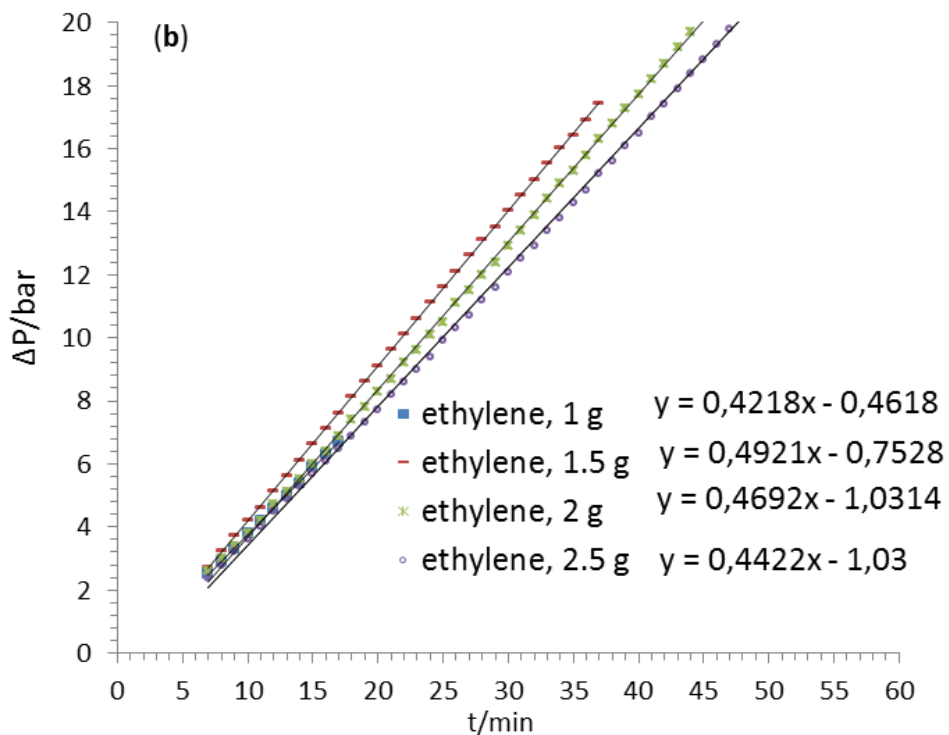

**Figure S4.** Gas consumption of CO and ethylene versus reaction time: effect of the amount of ethylene

**2.5. Effect of the pressure of CO.** Reaction conditions:  $[\text{Pd}_2(\text{dba})_3\text{-CHCl}_3]$  (11.1 mg, 0.0107 mmol, 0.0214 mmol Pd), **L2** (22.2 mg, 0.0430 mmol), PTSA (65.2 mg, 0.3432 mmol), MeOH (20 mL), ethylene (1.5 g, 53.57 mmol), CO (10-42 bar, 1.3-5.1 g, 46.43-182.14 mmol), 23 °C.

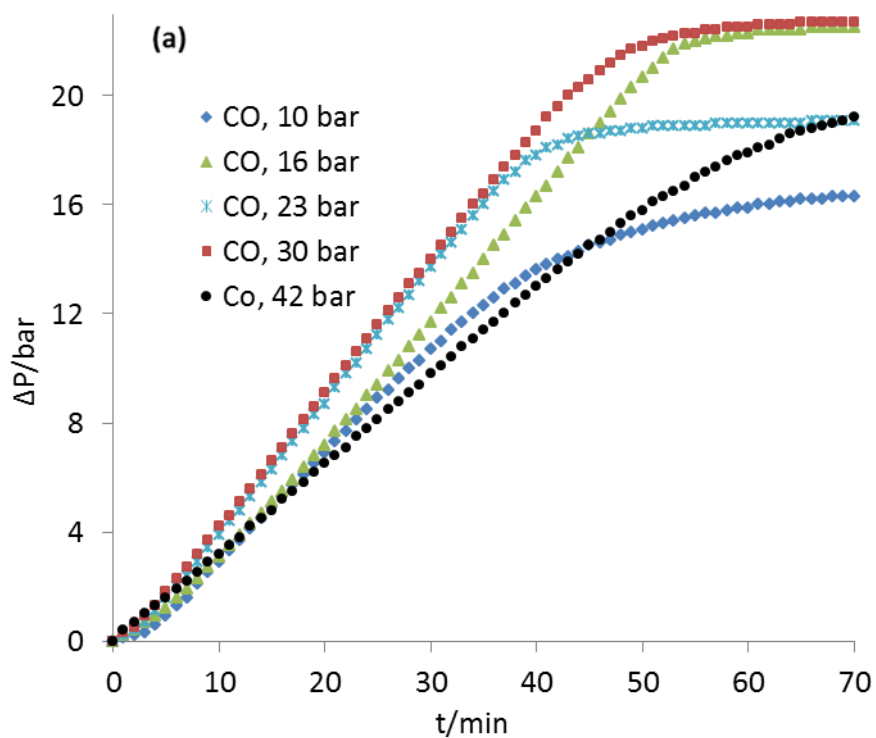

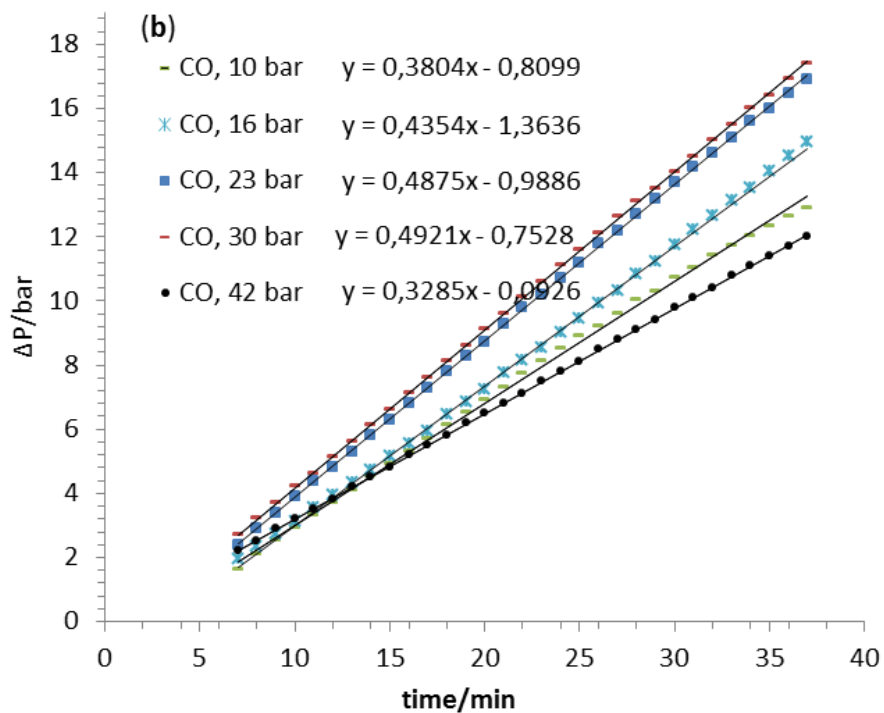

Figure S5. Gas consumption of CO and ethylene versus reaction time: effect of the amount of CO.

**2.6. Effect of the Palladium catalyst concentration.** The reactions were carried out under a constant large excess of ligand **L2** and of PTSA conditions (Pd/**L2**/PTSA: from 1/4/16 to 0.125/4/16): [Pd<sub>2</sub>(dba)<sub>3</sub>] (11.45-1.43 mg, 0.00313-0.025 mmol Pd), **L2** (51.6 mg, 0.1 mmol), PTSA (76 mg, 0.4 mmol), MeOH (20 mL), ethylene (2.0 g, 71.43 mmol), CO (30 bar), 23 °C.

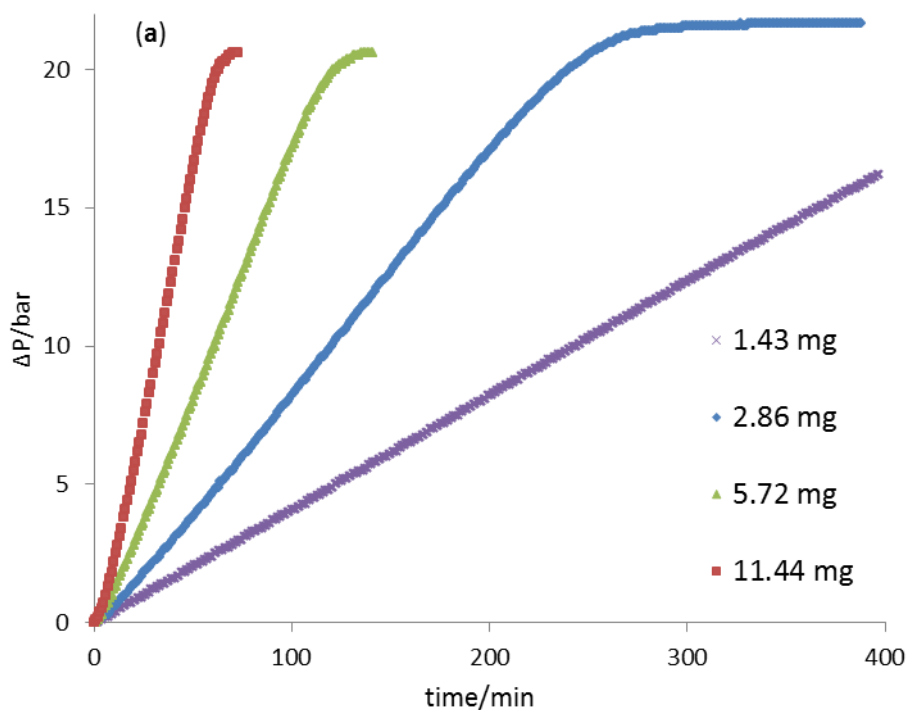

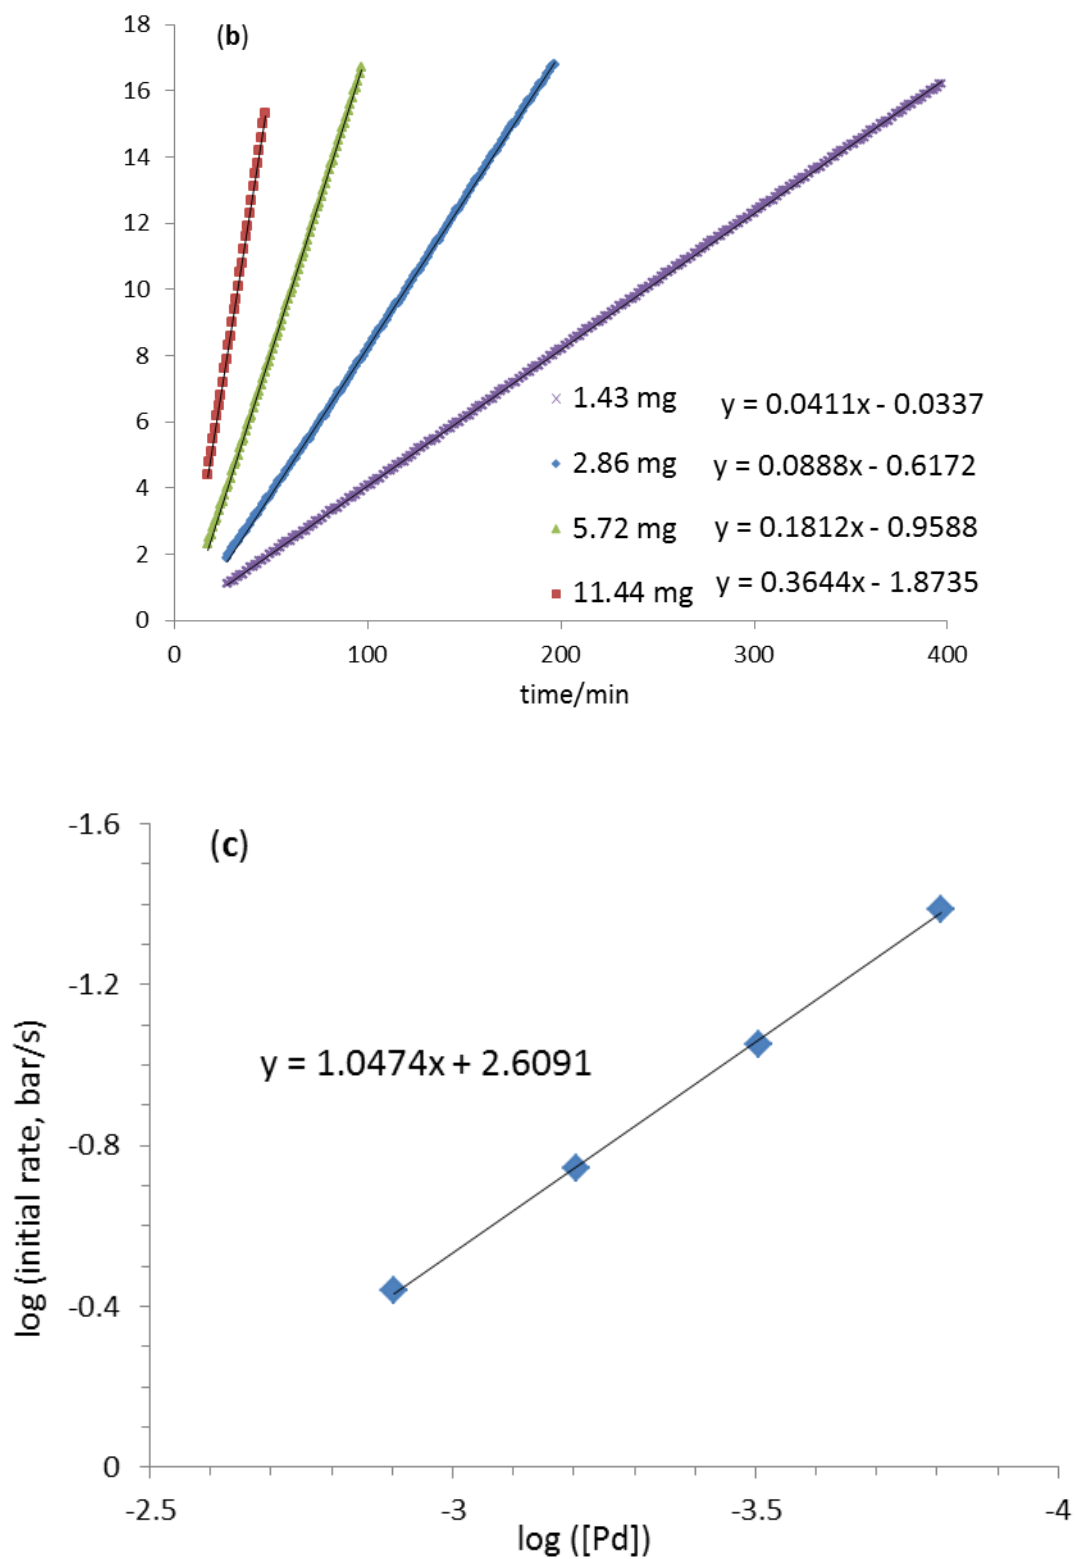

**Figure S6.** Effect of the palladium catalyst concentration: (a) gas consumption of CO and ethylene, (b) calculation of initial reaction rate and (c) plot of log (initial rate) versus log (the palladium catalyst concentration).



**2.7. Ethylene methoxycarbonylation at various reaction temperature:**  $[\text{Pd}_2(\text{dba})_3 \cdot \text{CHCl}_3]$  (11.1 mg, 0.0107 mmol, 0.0214 mmol Pd), **L2** (22.2 mg, 0.0430 mmol), PTSA (65.2 mg, 0.3432 mmol), MeOH (20 mL), ethylene (2.0 g, 71.43 mmol), CO (30 bar), 0-80 °C.

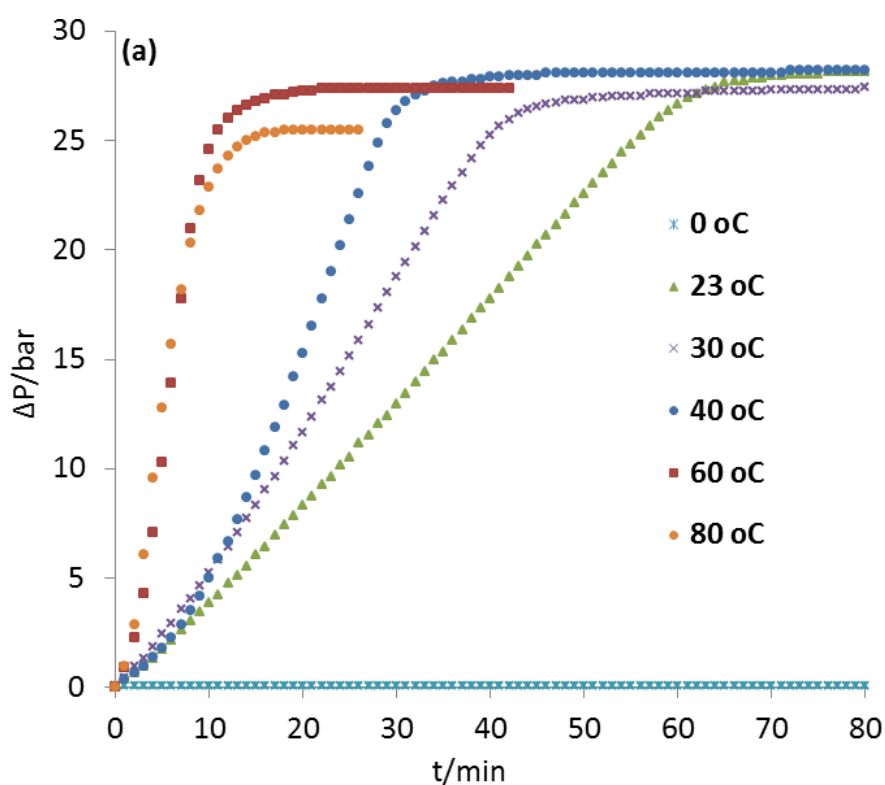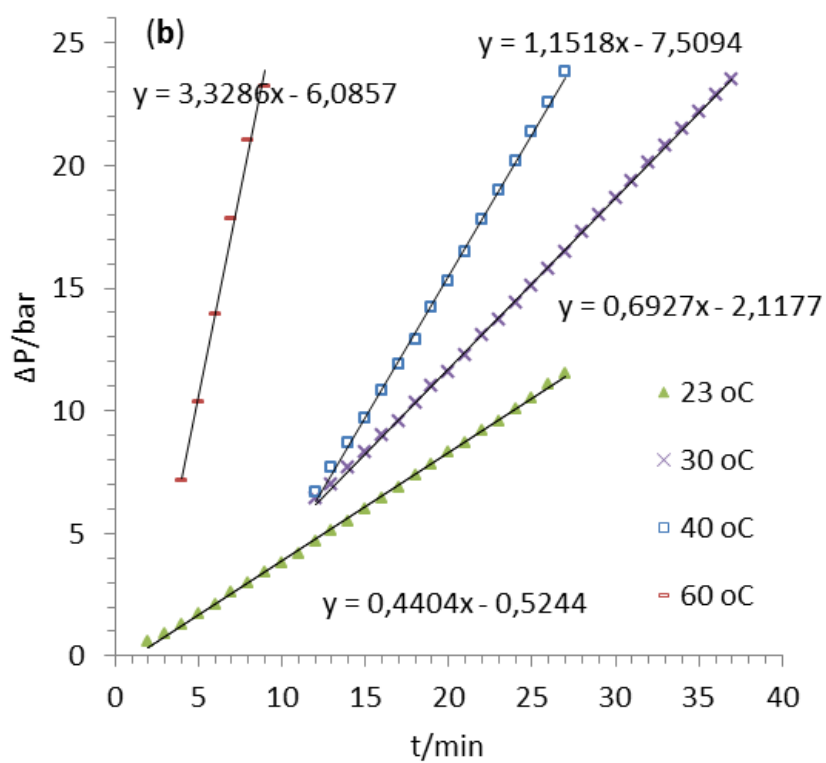

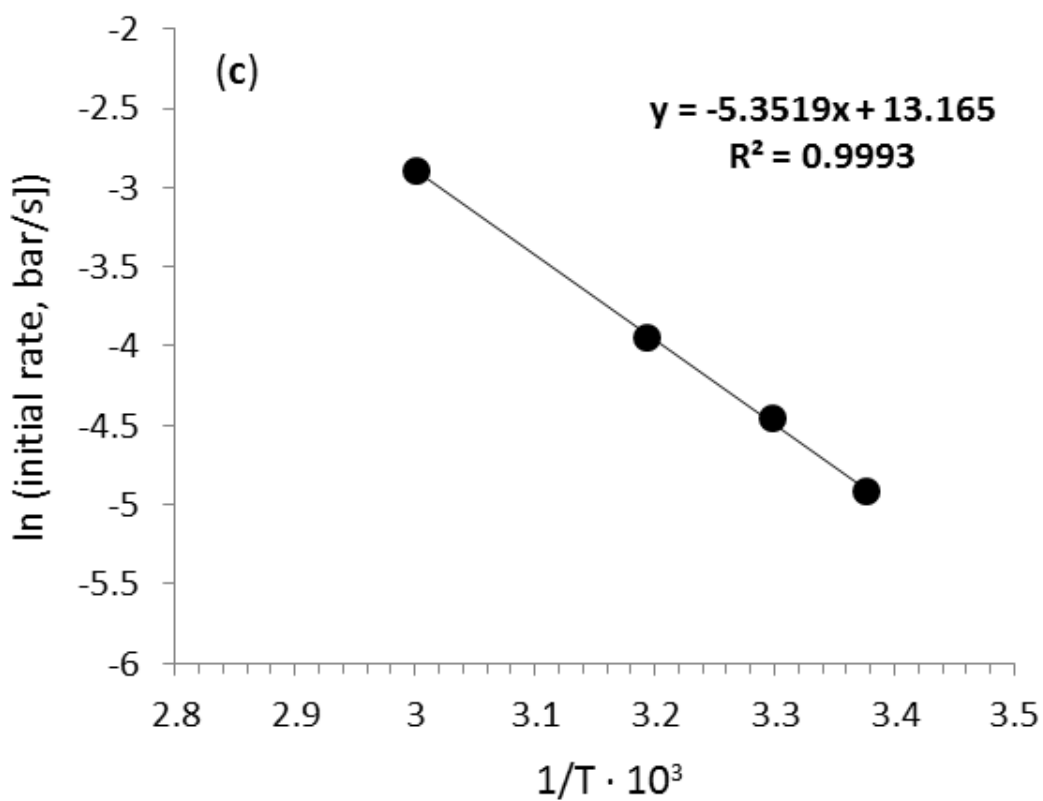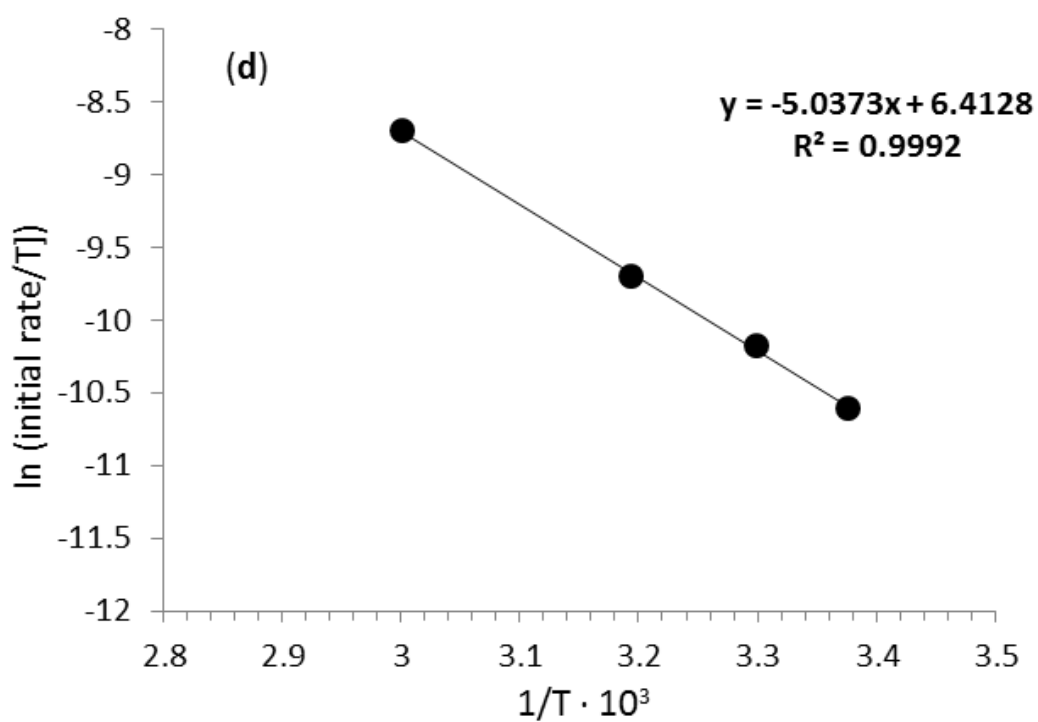

**Figure S7.** Pd/L2-catalyzed ethylene methoxycarbonylation at various reaction temperature: (a) Gas consumption of CO and ethylene, (b) calculation of the initial rate, (c) Arrhenius plot and (d) Eyring plot.

**a). Calculation of apparent activation energy and derivation of Arrhenius equation**

According to the reaction rate,

$$r = k[\text{ethylene}]^a[\text{CO}]^b[\text{MeOH}]^c[\text{cat.}]^d$$

and  $a = 0, b = 0, d = 1,$

So initial reaction rates,

$$r = k[\text{cat.}]^1[\text{MeOH}]^c$$

According to Arrhenius equation,

$$k = Ae^{-\frac{E_a}{RT}}$$

Initial reaction rates,

$$r = Ae^{-\frac{E_a}{RT}}[\text{cat.}]^1[\text{MeOH}]^c$$

So,

$$\ln r = -\frac{E_a}{RT} + \ln A + \ln([\text{cat.}] [\text{MeOH}]^c)$$

So,  $E_a = 44.5 \text{ kJ/mol}.$

**b). Calculation of Gibbs free energy, enthalpy, entropy, and derivation of Eyring equation**

According to Eyring equation ,

$$k = \frac{k_B T}{h} e^{-\frac{\Delta G^\ddagger}{RT}}$$

And

$$r = k[\text{cat.}]^1[\text{MeOH}]^c$$

So,

$$r = \frac{k_B T}{h} e^{-\frac{\Delta G^\ddagger}{RT}} [\text{cat.}]^1 [\text{MeOH}]^c$$

Gibbs free energy equation,

$$\Delta G^\ddagger = \Delta H^\ddagger - T\Delta S^\ddagger$$

Then,

$$\ln \frac{r}{T} = -\frac{\Delta H^\ddagger}{RT} + \frac{\Delta S}{R} + \ln \frac{k_B}{h} + \ln([\text{cat.}][\text{MeOH}]^c)$$

So,

$$\Delta H^\ddagger = 41.9 \text{ kJ/mol}$$

**Table S1.** Effect of reaction temperature (T) on initial rates (r).

| T/K    | 1/T, 1/K    | r, bar/min | ln (r, bar/s) | r/K         | Ln (r/K)     |
|--------|-------------|------------|---------------|-------------|--------------|
| 296.15 | 3.376667229 | 0.4404     | -4.914416436  | 2.47847E-05 | -10.60528252 |
| 303.15 | 3.298697015 | 0.6972     | -4.461502836  | 3.80835E-05 | -10.17573057 |
| 313.15 | 3.193357816 | 1.1518     | -3.953018626  | 6.13018E-05 | -9.699700935 |
| 333.15 | 3.001650908 | 3.3286     | -2.891792767  | 0.000166522 | -8.700385606 |

**2.8. Pd/L2-catalyzed ethylene methoxycarbonylation at 100 °C:** Under argon atmosphere, a 300 mL steel autoclave was charged with  $[\text{Pd}_2(\text{dba})_3 \cdot \text{CHCl}_3]$  (0.6 mg, 0.00058 mmol, 0.00116 mmol Pd), **L2** (258 mg, 0.5 mmol), and PTSA (760 mg, 4 mmol). Methanol (100 mL) was injected into the autoclave via syringe. The weight of the autoclave was determined. Then ethylene (12 g, circa, 357 mmol) was introduced into the autoclave (mass control by balance). After CO (30 bar) was introduced into the autoclave, the reaction mixture was carried out at 100 °C for 6 h. Significant gas consumption was observed. The autoclave was cooled to room temperature and depressurized slowly. Then the same amount of ethylene and CO was introduced into the autoclave again and the reaction was carried out at 100 °C for 6 h. After 4 times, we weighted the autoclave and total 74 g mass addition of the autoclave was detected by balance, which corresponded to 116 g of the desired product. The product methyl propionate was confirmed by GC analysis (>99% selectivity). Total TON (turnover number): 1,139,000, TOF for 24 h: 47,000  $\text{h}^{-1}$ .

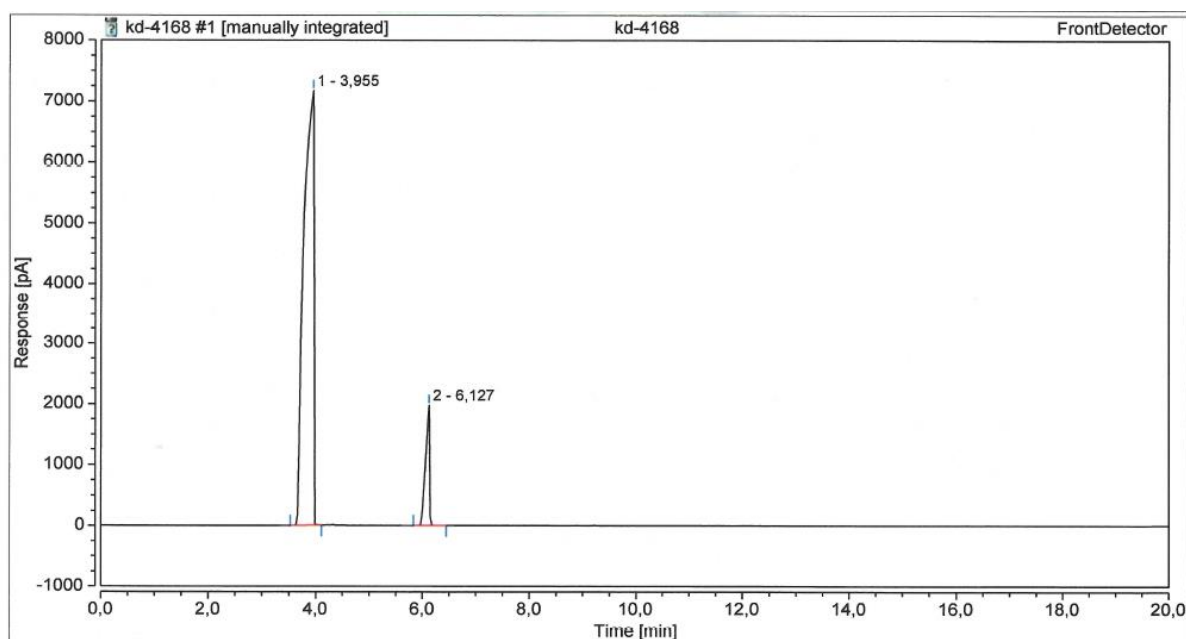

**Figure S8.** GC spectrum for Pd-catalyzed methoxycarbonylation of ethylene

**2.9. Kinetic isotope effect on ethylene methoxycarbonylation with Pd/L2:** Reaction conditions:  $[\text{Pd}_2(\text{dba})_3\text{-CHCl}_3]$  (11.1 mg, 0.0107 mmol, 0.0214 mmol Pd), **L2** (22.2 mg, 0.0430 mmol), PTSA (65.2 mg, 0.3432 mmol), MeOH or  $\text{CH}_3\text{OD}$  (20 mL), ethylene (2 g, 71.43 mmol), CO (30 bar), 23 °C.

To further check the H/D exchange products, we slightly modified our procedure and started the reaction at first using  $\text{CD}_3\text{OD}$  and ethylene without CO for 3 h; and then further with CO. Finally we found multi-deuterated  $\alpha$ - and  $\beta$ -isomer products (Figure S12). Reaction conditions:  $[\text{Pd}_2(\text{dba})_3]$  (9.82 mg, 0.0107 mmol, 0.0214 mmol Pd), **L2** (22.2 mg, 0.0430 mmol), PTSA (65.2 mg, 0.3432 mmol),  $\text{CD}_3\text{OD}$  (20 mL), ethylene (2 g, 71.43 mmol), CO (30 bar), 23 °C.

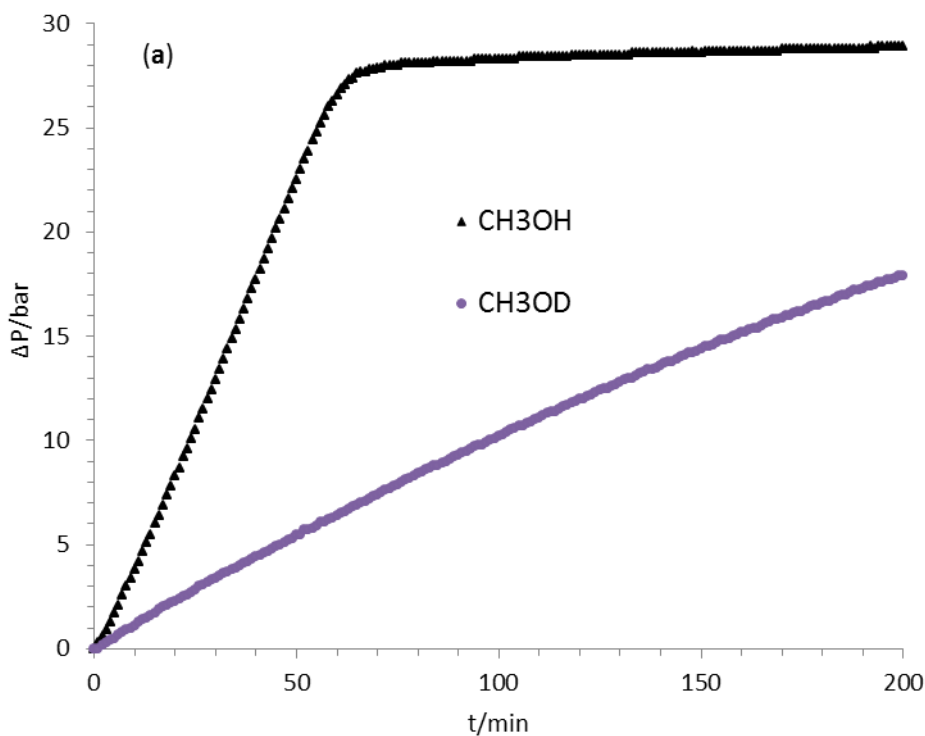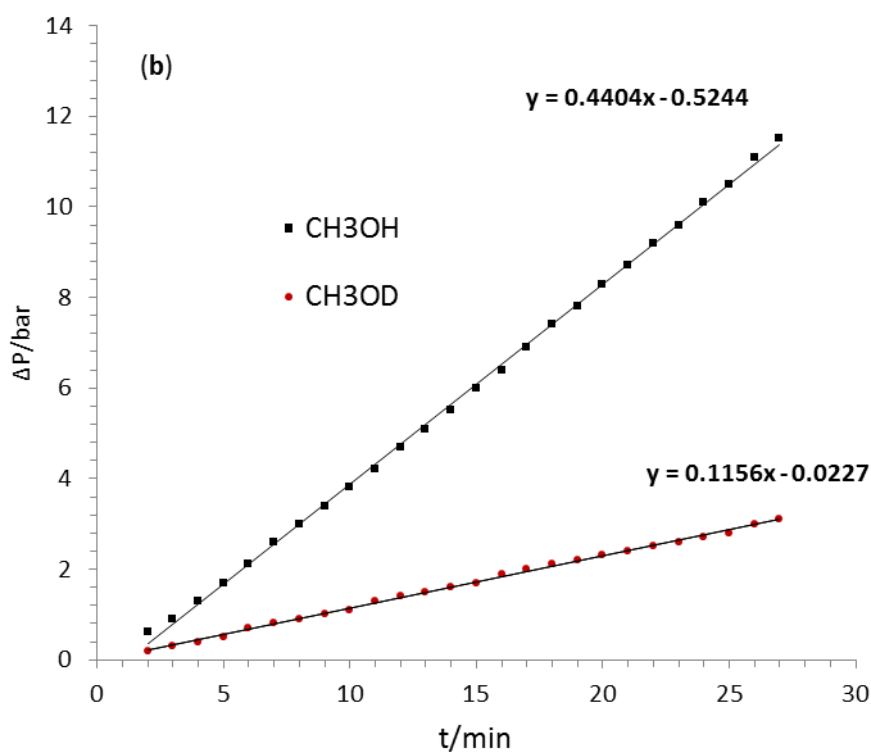

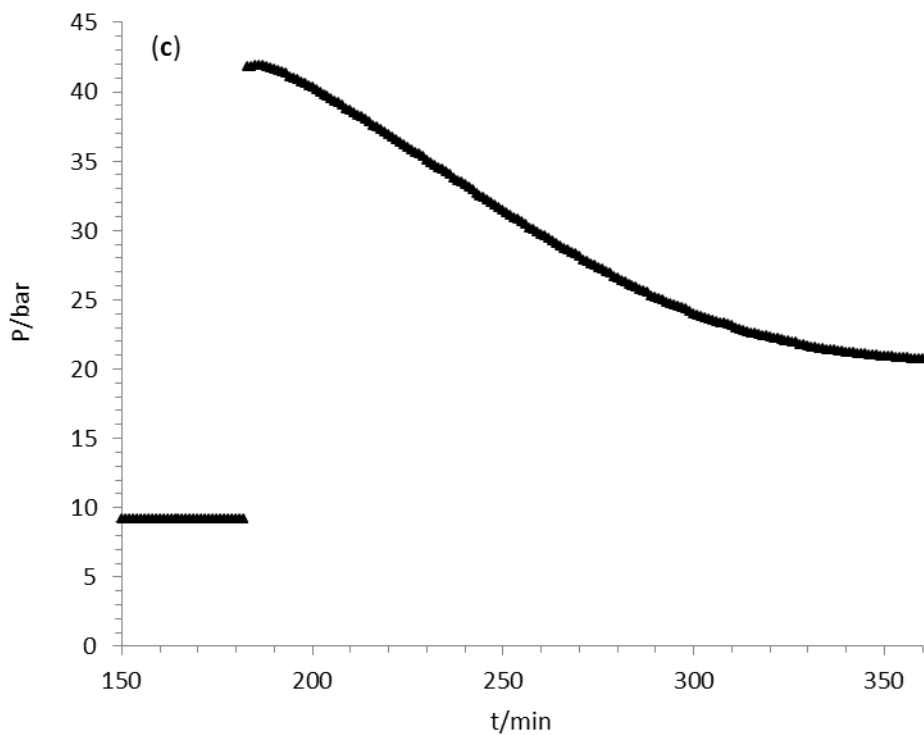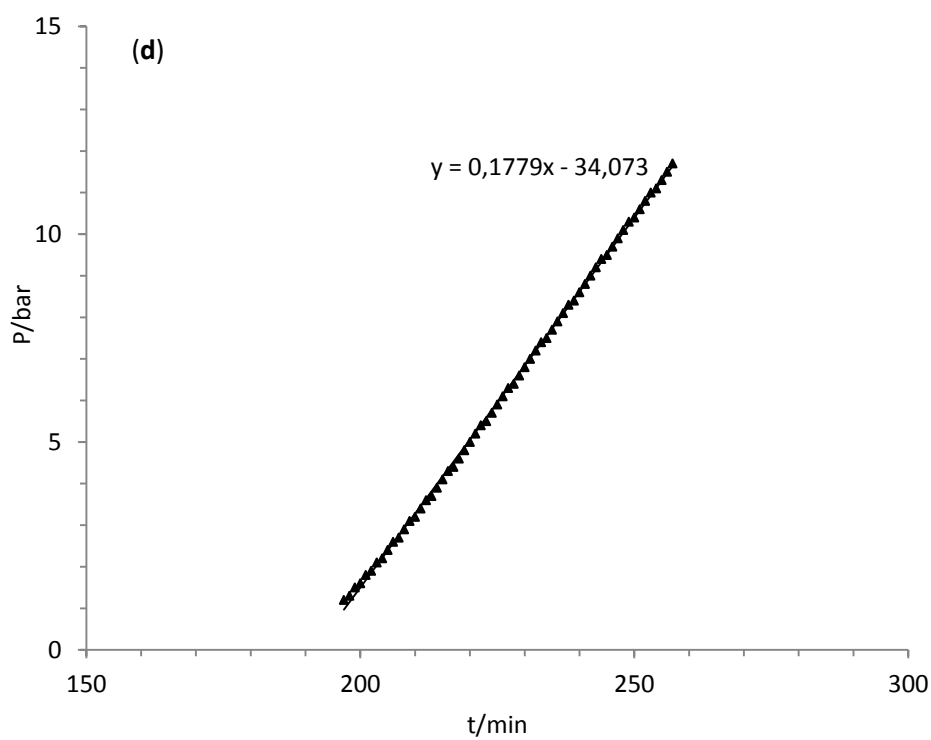

**Figure S9.** Kinetic isotope effect: (a) Gas consumption of CO and ethylene in CH<sub>3</sub>OH or CH<sub>3</sub>OD, (b) calculation of the initial rate in CH<sub>3</sub>OH or CH<sub>3</sub>O, (c) gas pressure of the reaction system versus time under modified conditions, (d) calculation of the initial rate under modified conditions.

### 3. Characterization of catalytic intermediates

**3.1. Methoxycarbonylation of ethylene catalyzed by [Pd(L2)(OTf)]OTf:** Reaction conditions: [Pd(L2)(OTf)]OTf (19.75 mg, 0.0214 mmol), L2 (11.1 mg, 0.0215 mmol), PTSA (65.2 mg, 0.3432 mmol), MeOH (20 mL), ethylene (1.5 g, 53.57 mmol), CO (30 bar), 23 °C.

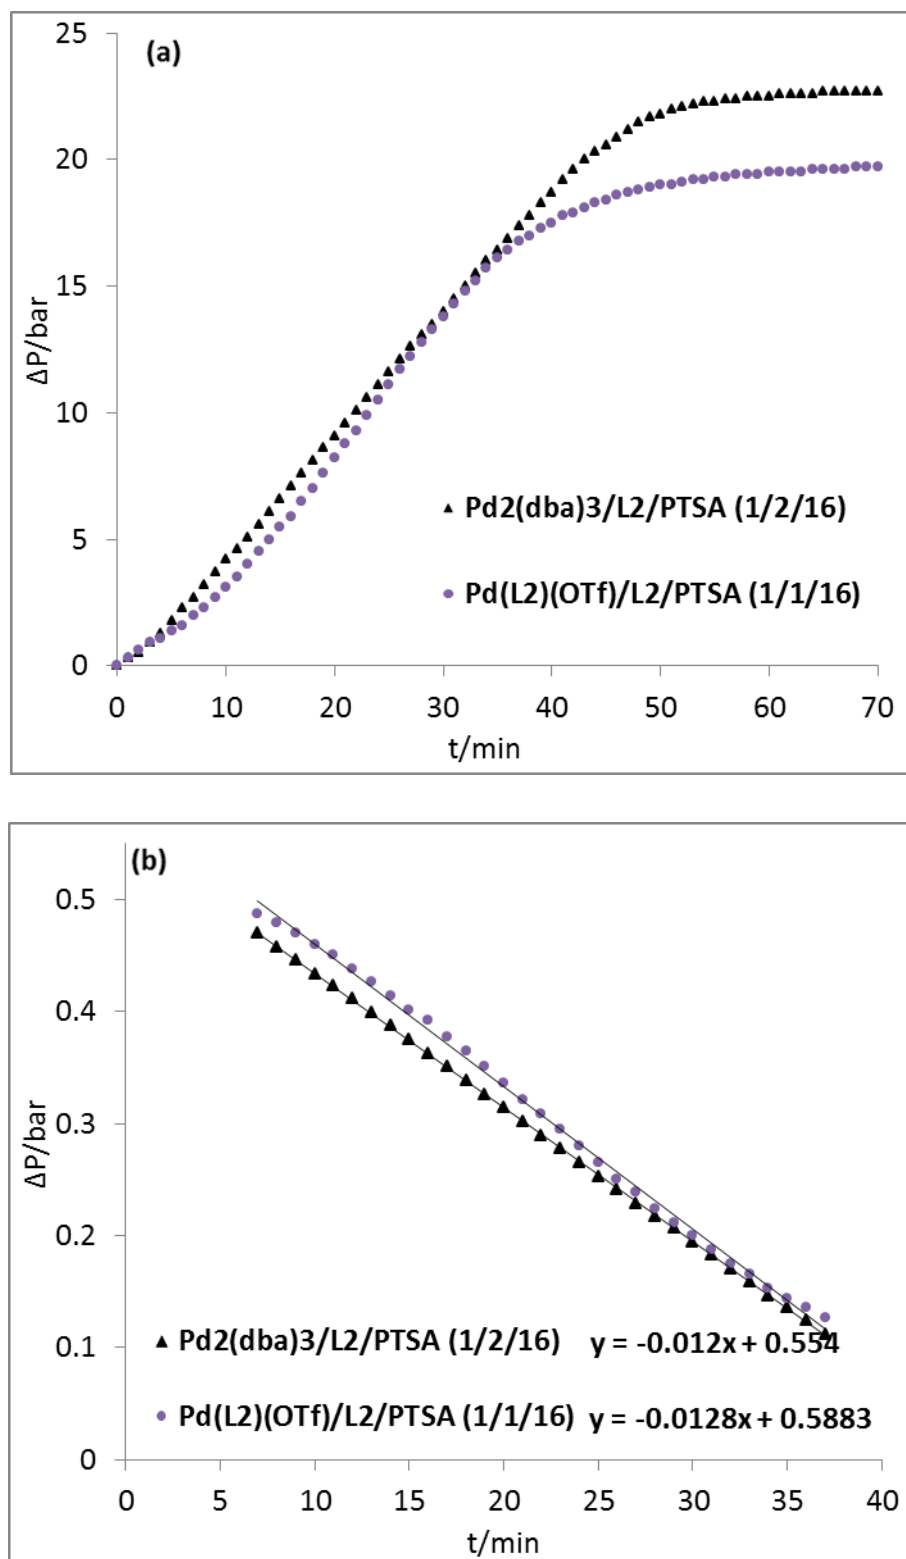

**Figure S10.** Methoxycarbonylation of ethylene catalyzed by [Pd(L2)(OTf)]OTf: (a) gas consumption of CO and ethylene, (b) ethylene concentration versus reaction time.

### 3.2. ESI-mass spectroscopy analysis

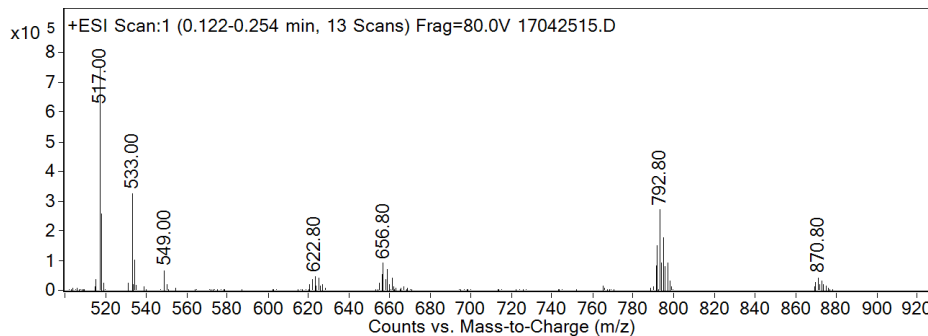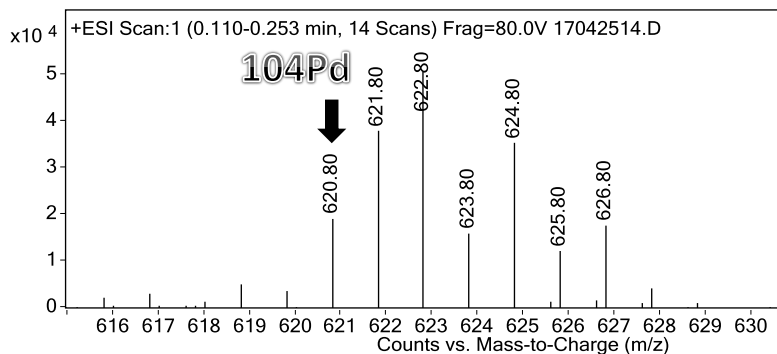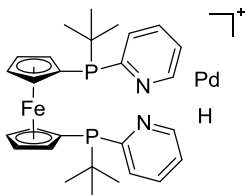

Exact Mass: 623,06542  
 Molecular Weight: 623,81398  
 m/z: 623.06542 (100.0%), 625.06583 (96.8%),  
 622.06702 (81.7%), 627.06709 (42.9%),

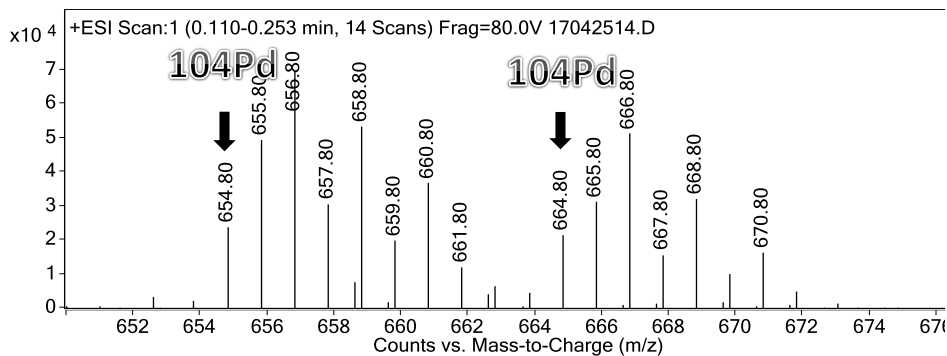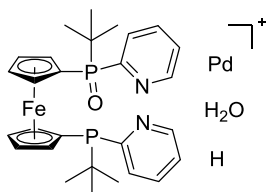

Exact Mass: 657,07090  
 Molecular Weight: 657,82798  
 m/z: 657.07090 (100.0%), 659.07131  
 (96.8%), 656.07250 (81.7%), 661.07257

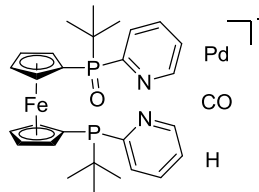

Exact Mass: 667,05525  
 Molecular Weight: 667,82298  
 m/z: 667.05525 (100.0%), 669.05566 (96.8%),  
 666.05685 (81.7%), 671.05692 (42.9%)



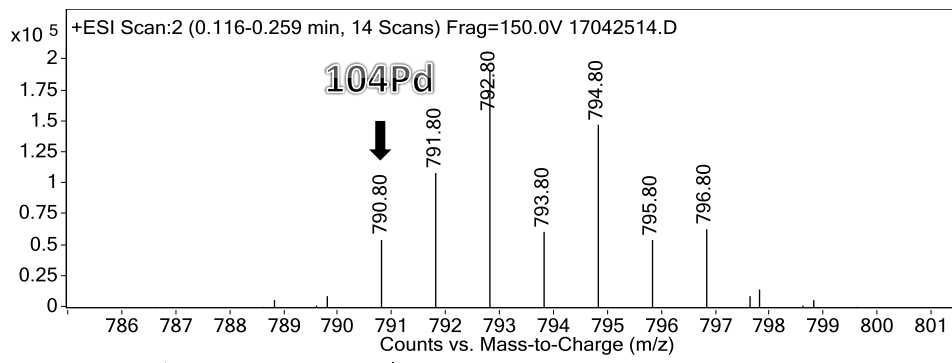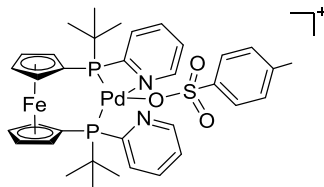

Exact Mass: 793,06919  
 Molecular Weight: 793,99598  
 m/z: 793.06919 (100.0%), 795.06960 (96.8%),  
 792.07079 (81.7%), 797.07086 (42.9%)

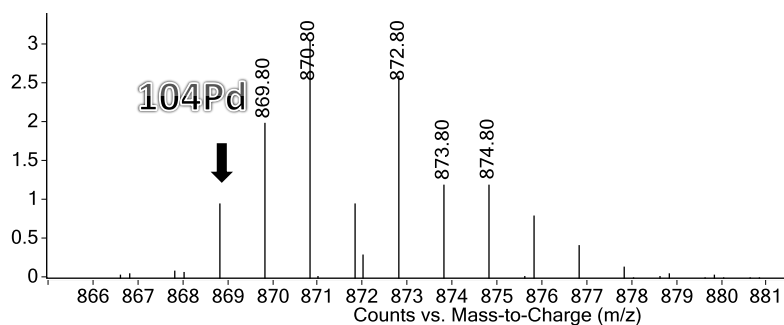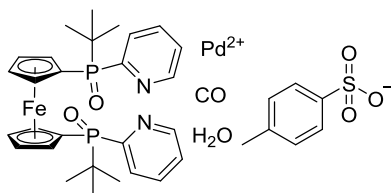

Exact Mass: 871,06450  
 Molecular Weight: 872,01898  
 m/z: 871.06450 (100.0%), 873.06491 (96.8%),  
 870.06610 (81.7%), 875.06617 (42.9%)

**Figure S11.** ESI-MS analysis of the crude reaction solution for detection of Pd complexes.

## 4. DFT calculation

### 4.1: Computational methods and models

All calculations were carried out by using the Gaussian 09 program.<sup>1</sup> All structures were optimized at the B3PW91<sup>2</sup> level of density functional theory (DFT) with the TZVP<sup>3</sup> basis set (LANL2DZ effective core potential for Pd and Fe<sup>4</sup>). All optimized structures were characterized either as energy minimums without imaginary frequencies or transition states with only one imaginary frequency by frequency calculations; and the imaginary model connects the initial and the final states. The thermal correction to Gibbs free energy at 298 K from frequency analysis was added to the total electronic energy, and the corrected Gibbs free energy ( $\Delta G$ ) at 298 K was used for discussion and comparison. We also carried out self-consistent reaction field (SCRF) structure optimization and frequency calculation at the B3PW91 level using the solvation model based on solute electron density (SMD)<sup>5</sup> and methanol as solvent to estimate the solvation effect (B3PW91-SCRF). To testing the effect of van der Waals dispersion correction, we computed the B3PW91-GD3BJ-SCRF/LANL2DZ(Pd)/TZVP/SMD(MeOH) single-point energies of the full potential energy surface using the GD3BJ parameter with the B3PW91-SCRF/LANL2DZ(Pd)/TZVP/SMD(MeOH) geometries. In all our calculations, we used the real-size model systems without constrains and simplifications for the ligands, *o*-C<sub>6</sub>H<sub>4</sub>(CH<sub>2</sub>P<sup>*t*</sup>Bu<sub>2</sub>)<sub>2</sub> (**L1**) and ferrocenyl(P<sup>*t*</sup>BuPy)<sub>2</sub> (**L2**), as well as their corresponding Pd complexes, **L1Pd** and **L2Pd**.

There are reports about the mechanism of alkoxycarbonylation of olefin (R-CH=CH<sub>2</sub>) catalyzed by Pd complexes (Scheme S1).<sup>6</sup> Starting from the cationic [LPd-H]<sup>+</sup> complex, the first step is olefin coordination and Pd-H insertion with the formation of the alkyl complex [LPd(-CH<sub>2</sub>CH<sub>2</sub>R)]<sup>+</sup>; and the second step is CO coordination and insertion with the formation of the acyl complex [LPd(-CO-R')]<sup>+</sup>; and the last step is methanolysis resulting the formation of ester and the regeneration of the active [LPd-H]<sup>+</sup> catalyst. In our study, we followed this mechanism for **L1Pd** and **L2Pd**. At first, we presented the results from gas phase calculations and then those under the consideration of solvation with methanol as solvent as well as those in methanol solution including van der Waals dispersion correction. Finally comparison between **L1Pd** and **L2Pd** has been made.

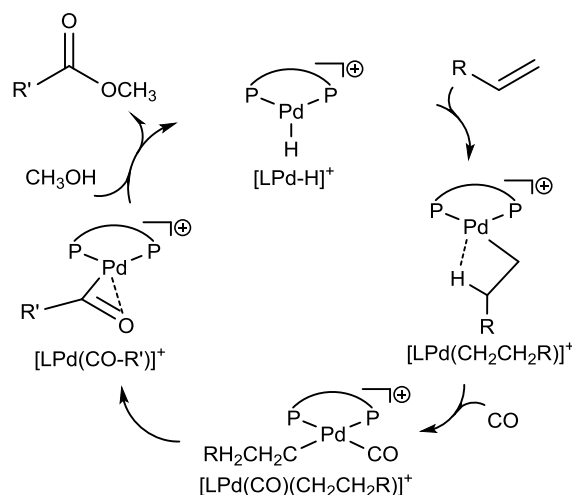

**Scheme S1.** Well-accepted mechanism of Pd-catalyzed methoxycarbonylation of olefins

### 4.2: Computational results

#### (a) Reaction with **L1Pd** complex in gas phase

For **L1Pd**, the classic mechanism starting with [**L1Pd**-H]<sup>+</sup> species (**1A**) for ethylene methoxycarbonylation in gas phase was computed at first. The potential energy surfaces is shown in Scheme S2. Surprisingly, no stable intermediate of side-on coordinated ethene could be located and all attempts to optimize such structures resulted in the

spontaneous formation of ethyl complex via  $\beta$ -H agostic interaction,  $[\mathbf{L1Pd}(\text{CH}_2\text{CH}_3)]^+$  (**1B**); and this is probably due to the rather small size of ethylene, which can free rotate in the side-on coordination. The formation of **1B** is therefore barrier-less and exergonic by 27.1 kJ/mol.

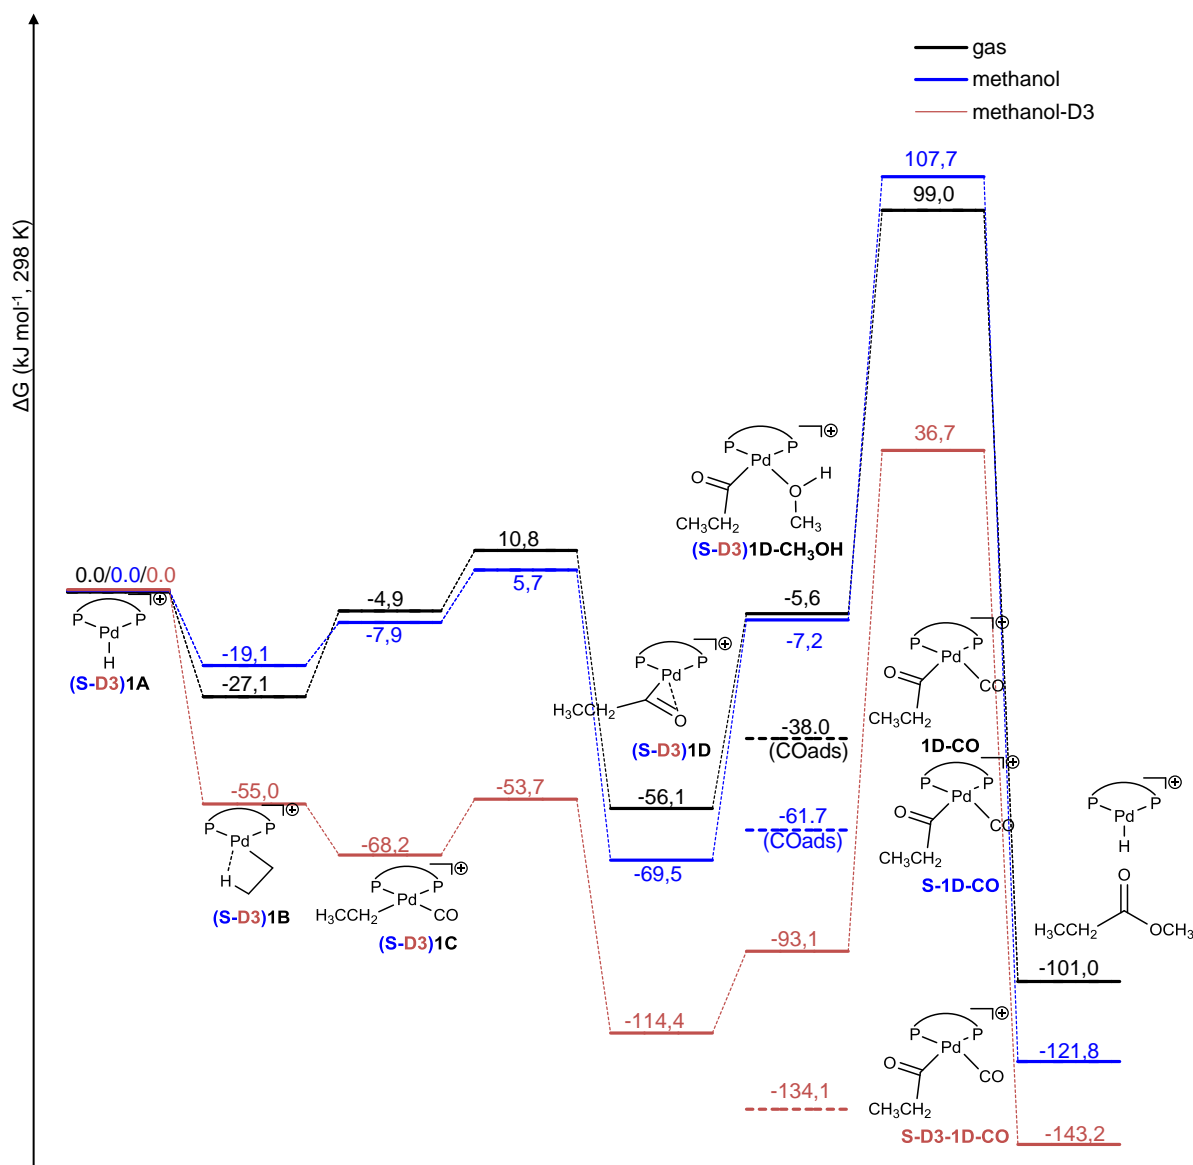

**Scheme S2.** Potential energy surface by using  $[\mathbf{L1Pd-H}]^+$  in ethene methoxycarbonylation in gas phase (black line), in methanol solution (blue line with **S**) and in methanol solution including van der Waals dispersion correction (black-red line with **D3**)

On the basis of the ethyl complex **1B**, the next step is CO coordination to form complex  $[\mathbf{L1Pd}(\text{CO})(-\text{CH}_2\text{CH}_3)]^+$  (**1C**), followed by CO insertion resulting in the formation of acyl complex,  $[\mathbf{L1Pd}(-\text{CO}-\text{CH}_2\text{CH}_3)]^+$  (**1D**). Starting from complex **1B**+CO, CO coordination is endergonic by 22.2 kJ/mol; and CO insertion has barrier of 37.9 kJ/mol and is exergonic by 29.0 kJ/mol. In acyl complex **1D**, not only the carbon atom but also the oxygen atom of the C=O group interact with the Pd center.

Starting from acyl complex **1D**, CO coordination resulting in the formation of  $[\mathbf{L1Pd}(\text{CO})(-\text{CO}-\text{CH}_2\text{CH}_3)]^+$  intermediate (**1D-CO**) which is endergonic by 18.1 kJ/mol and therefore CO does not affect the acyl complex. Alternatively, acyl complex **1D** undergoes methanolysis with  $\text{CH}_3\text{OH}$  to form ester  $[\text{CH}_3\text{CH}_2-\text{CO}-\text{OCH}_3]$  and then regenerates the

active catalyst  $[\mathbf{L1Pd-H}]^+$ . Starting from complex  $\mathbf{1D}+\text{CH}_3\text{OH}$ , methanolysis has barrier of 155.1 kJ/mol and is exergonic by 44.9 kJ/mol. On the basis of the potential energy surface, one can see that the acyl complex  $\mathbf{1D}$  as the most stable species is the resting state; and methanolysis as the highest energy point is the rate-determining step; and the effective barrier is 155.1 kJ/mol. Due to the structure of the ligand backbone, we searched different orientations of methanol, acyl group and ligand; the reported transition state has the lowest energy.

To reduce the barrier, Mecking *et al.*,<sup>7</sup> investigated a three-methanol cluster assisted methanolysis step for methyl oleate alkoxycarbonylation. It is found that the effective barrier is 124.3 kJ/mol, which is 20.0 kJ/mol (or 4.8 kcal/mol) lower than that of the single methanol route (144.3 kJ/mol or 29.7 kcal/mol). On the basis of this idea, we also calculated the methanolysis step by using a three-methanol cluster. However, we found that the effective barrier is 160.6 kJ/mol, and is 5.5 kJ/mol higher than that of the single methanol route (155.1 kJ/mol).

In order to find the reason for the opposite result as reported by Mecking *et al.*, we checked the reported structure of the three-methanol cluster at the same level of theory [B3LYP/6-31g(d) and LANL2DZ effective core potential for Pd]. It is found that the reported planar geometry in  $C_s$  symmetry of the three-methanol cluster by Mecking is indeed not an energy minimum structure. Instead, it has three imaginary frequencies ( $i175.3\text{ cm}^{-1}$ ,  $i102.2\text{ cm}^{-1}$  and  $i95.9\text{ cm}^{-1}$ ) and represents a higher order saddle point, which is 25.1 kJ/mol (or 6.0 kcal/mol) higher than the non-planar energy minimum structure used in our work (see Table S6). Taking this energy difference into account, the effective barrier of the three-methanol route by Mecking should be 149.4 kJ/mol, which is 5.1 kJ/mol higher in energy than the single methanol route (144.3 kJ/mol). This corrected result is in full agreement with our result obtained here. Therefore, the three-methanol cluster assisted route does not bring the expected energetic advantage.

#### (b) Reaction with $\mathbf{L1Pd}$ complex in methanol solution as well as including van der Waals dispersion

Under the consideration of methanol as solvent; we computed the same elementary steps as in gas phase and the potential energy surface is shown in Scheme S2 for comparison. Once again, no stable intermediate of side-on coordinated ethene to active catalyst  $[\mathbf{S-L1PdH}]^+$  species ( $\mathbf{S-1A}$ ) was located and all attempts to optimize such structures also resulted in the spontaneous formation of ethyl complex via  $\beta$ -H agostic interaction,  $[\mathbf{S-L1Pd}(-\text{CH}_2\text{CH}_3)]^+$  ( $\mathbf{S-1B}$ ); and this step is exergonic by 19.1 kJ/mol, which is less by 8.0 kJ/mol than that in gas phase.

On the basis of ethyl complex  $\mathbf{S-1B}$ , the next step is CO coordination to form complex  $[\mathbf{S-L1Pd}(\text{CO})(-\text{CH}_2\text{CH}_3)]^+$  ( $\mathbf{S-1C}$ ), followed by CO insertion leading to in the formation of acyl complex,  $[\mathbf{S-L1Pd}(-\text{CO}-\text{CH}_2\text{CH}_3)]^+$  ( $\mathbf{S-1D}$ ). Starting from complex  $\mathbf{S-1B}+\text{CO}$ , CO coordination is endergonic by 11.2 kJ/mol; and CO insertion has barrier of 24.8 kJ/mol and is exergonic by 50.4 kJ/mol.

Starting from acyl complex  $\mathbf{S-1D}$ , further CO coordination resulting in the formation of  $[\mathbf{L1Pd}(\text{CO})(-\text{CO}-\text{CH}_2\text{CH}_3)]^+$  ( $\mathbf{S-1D-CO}$ ) is endergonic by 7.8 kJ/mol and does not affect acyl complex. Alternatively, acyl complex  $\mathbf{S-1D}$  undergoes methanolysis with  $\text{CH}_3\text{OH}$  to form the ester  $[\text{CH}_3\text{CH}_2-\text{CO}-\text{OCH}_3]$  and then regenerates the active catalyst  $[\mathbf{S-L1PdH}]^+$ . Starting from complex  $\mathbf{S-1D}+\text{CH}_3\text{OH}$ , the methanolysis has barrier of 177.2 kJ/mol and is exergonic by 52.3 kJ/mol. The potential surfaces show that acyl complex  $\mathbf{S-1D}$  is the resting state; and methanolysis is the rate-determining step; and the effective barrier is 177.2 kJ/mol. Again, the reported transition state has the lowest energy among several conformations on the basis of different orientations among methanol, acyl group and ligand.

On the basis of a three-methanol cluster, we calculated the Gibbs free energies which are obtained from the solvent corrected electronic energies and thermal correction from the gas phase. It is found that the effective barrier is raised from 177.2 to 191.7 kJ/mol, and apparent barrier is raised from 107.7 to 122.2 kJ/mol, indicating that there is no expected energy lowering and stabilizing effect by methanol clustering, instead it raises the barrier by 14.5 kJ/mol.

Furthermore, van der Waals dispersion energies have been included by single point calculation at the B3PW91-GD3BJ-SCRF/LANL2DZ(Pd)/TZVP/SMD(MeOH) level of theory. Taking dispersion into consideration, the formation of  $[\text{L1Pd}(-\text{CH}_2\text{CH}_3)]^+$  (**S-D3-1B**) is highly exergonic by 55.0 kJ/mol, which is more exergonic by 27.9 and 35.9 kJ/mol than in gas phase and methanol without dispersion, respectively. Starting from complex **S-D3-1B**, CO coordination is exergonic by 13.2 kJ/mol which is opposite to the results calculated without dispersion and CO insertion has barrier of 14.5 kJ/mol and is exergonic by 46.2 kJ/mol.

Starting from acyl complex **S-D3-1D**, further CO coordination resulting in the formation of  $[\text{L1Pd}(\text{CO})(-\text{CO}-\text{CH}_2\text{CH}_3)]^+$  (**S-D3-1D-CO**) is exergonic by 19.7 kJ/mol and this is opposite to the results calculated without dispersion. The coordination of  $\text{CH}_3\text{OH}$  is endergonic by 21.2 kJ/mol, and methanolysis through  $[\text{L1Pd}(\text{CH}_3\text{OH})(-\text{CO}-\text{CH}_2\text{CH}_3)]^+$  (**S-D3-1D-CH<sub>3</sub>OH**) to form the ester  $[\text{CH}_3\text{CH}_2-\text{CO}-\text{OCH}_3]$  and to regenerate the active catalyst  $[\text{S-L1PdH}]^+$  has barrier of 170.8 kJ/mol and is exergonic by 9.1 kJ/mol. The potential surfaces show that acyl complex with CO coordination **S-D3-1D-CO** is also the resting state; and methanolysis as the highest energy point is the rate-determining step; and the effective barrier is 170.8 kJ/mol.

Compared with the potential energy surface without dispersion, all species were further stabilized. It is noted that the CO coordinated ethyl (**S-D3-1C**) and acyl complex (**S-D3-1D-CO**) become more stable than those without CO coordination, and this is just opposite to the results in gas and methanol without dispersion. Furthermore, it is found that the effective barrier is 155.1 kJ/mol in gas phase, 177.2 kJ/mol in methanol and 170.8 kJ/mol in methanol solution by including dispersion.

### (c) Reaction with L2Pd complex in gas phase

The potential energy surfaces for **L2Pd** are shown in Scheme S3. In contrast to **L1Pd**, the protonation of **L2Pd** can have two isomers, one with proton at the Pd center  $[\text{L2Pd-H}]^+$  (**2A**) and one with proton at the N center of the pyridyl substitution  $[\text{NH-L2Pd}]^+$  (**N-2A**). It is found that **2A** is more stable than **N-2A** in gas phase; and the energy difference of 7.0 kJ/mol indicates dynamic equilibrium in favor of **2A** (94 %). Starting from  $[\text{L2Pd-H}]^+$ , no stable complex of ethene side-on coordination was located, and spontaneous formation of ethyl complex via  $\beta$ -H agostic interaction,  $[\text{L2Pd}(\text{CH}_2\text{CH}_3)]^+$  (**2B**), was found. The formation of ethyl complex (**2B**) is barrier-less and exergonic by 28.7 kJ/mol.

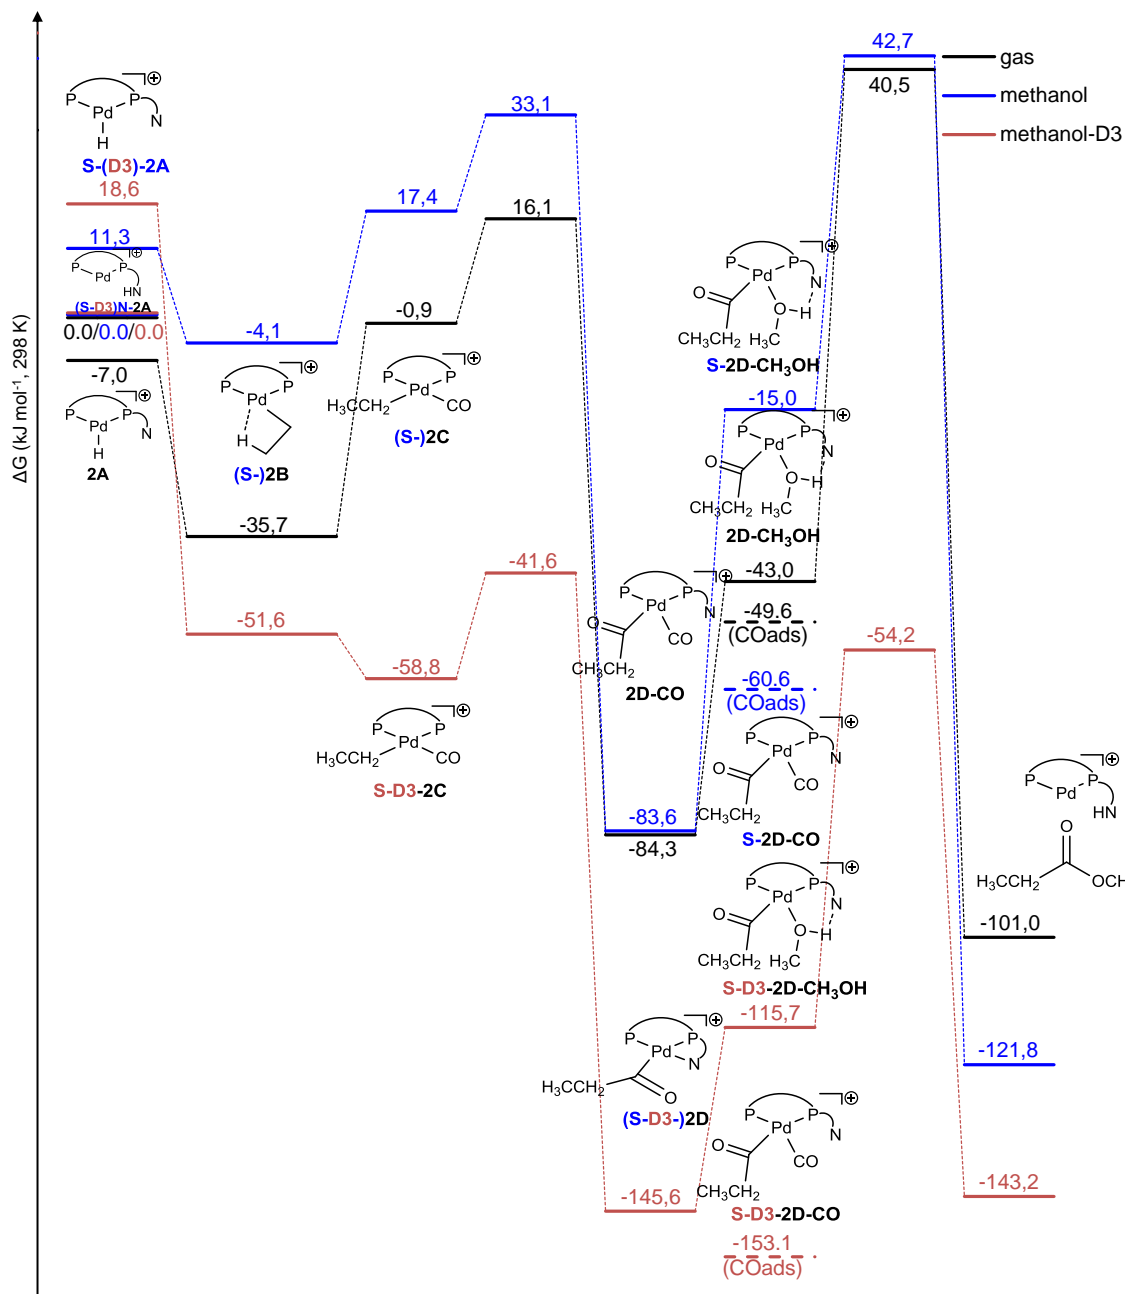

**Scheme S3.** Potential energy surface by using  $[\text{NH-L2Pd}]^+$  in ethene methoxycarbonylation in gas phase (black line), in methanol solution (blue line with **S**) and *n* methanol solution including van der Waals dispersion correction (bark-red line with **D3**)

On the basis of ethyl complex **2B**, the next step is CO coordination to form complex  $[\text{L2Pd}(\text{CO})(-\text{CH}_2\text{CH}_3)]^+$  (**2C**), followed by CO insertion resulting in the formation of acyl complex,  $[\text{L2Pd}(-\text{CO}-\text{CH}_2\text{CH}_3)]^+$  (**2D**). Starting from complex **2B**+CO, CO coordination is endergonic by 34.8 kJ/mol; and the formation of **2D** has barrier of 51.8 kJ/mol and is exergonic by 48.6 kJ/mol.

Starting from acyl complex **2D**, the formation of  $[\text{L2Pd}(\text{CO})(-\text{CO}-\text{CH}_2\text{CH}_3)]^+$  intermediate (**2D-CO**) from CO coordination is endergonic by 34.7 kJ/mol. Alternatively, the formation of the methanol adduct  $[\text{L1Pd}(\text{CH}_3\text{OH})(-\text{CO}-\text{CH}_2\text{CH}_3)]^+$  (**2D-CH<sub>3</sub>OH**) is endergonic by 41.3 kJ/mol. Starting from complex **1D**+CH<sub>3</sub>OH, methanolysis has barrier of 124.8 kJ/mol and is exergonic by 16.7 kJ/mol. The potential energy surface shows that acyl complex **2D** is the resting state and methanolysis is the rate-determining step and the effective barrier is 124.8 kJ/mol, which is lower than that for **L1Pd** (155.1 kJ/mol) in gas phase by 30.3 kJ/mol; indicating that **L2Pd** is more active than **L1Pd** in gas phase.

It is noted that the reported transition state has the lowest energy among several conformations on the basis of different orientations among methanol, the acyl group and the ligand.

#### (d) Reaction with L2Pd complex in methanol solution as well as including van der Waals dispersion

Under the consideration of methanol as solvent; we computed the same elementary steps as in gas phase; and the potential energy surface is shown in Scheme S3. It is worth noting that **S-N-2A** is more stable than **S-2A** by 11.3 kJ/mol indicates dynamic equilibrium in favor of **S-2A** (99.0%), and this is just the opposite to the results in gas phase. Once again, no stable intermediate of side-on coordinated ethene to active catalyst  $[\text{L2PdH}]^+$  species (**S-2A**) in methanol was located and all attempts to optimize such structures resulted in the spontaneous formation of ethyl complex via H-agostic interaction,  $[\text{L2Pd}(\text{CH}_2\text{CH}_3)]^+$  (**S-2B**); and this step is exergonic by 15.4 kJ/mol from **S-2A**.

On the basis of ethyl complex **S-2B**, the next step is CO coordination to form complex  $[\text{S-L2Pd}(\text{CO})(\text{CH}_2\text{CH}_3)]^+$  (**S-2C**), followed by CO insertion (carbonylation) leading to in the formation of acyl complex,  $[\text{L2Pd}(-\text{CO}-\text{CH}_2\text{CH}_3)]^+$  (**S-2D**). Starting from complex **S-2B**+CO, CO coordination is endergonic by 21.5 kJ/mol; and CO insertion has barrier of 37.2 kJ/mol and is exergonic by 79.5 kJ/mol.

Starting from acyl complex **S-2D**, further CO coordination resulting in the formation of  $[\text{L2Pd}(\text{CO})(-\text{CO}-\text{CH}_2\text{CH}_3)]^+$  (**S-2D-CO**) is endergonic by 23.0 kJ/mol and does not affect acyl complex. Alternatively, acyl complex **S-2D** can also coordinate one  $\text{CH}_3\text{OH}$  molecule to form the methanol adduct  $[\text{L2Pd}(\text{CH}_3\text{OH})(-\text{CO}-\text{CH}_2\text{CH}_3)]^+$ , (**S-2D-CH<sub>3</sub>OH**), which can undergo methanolysis to form the ester  $[\text{CH}_3\text{CH}_2-\text{CO}-\text{OCH}_3]$  and then regenerate the active catalyst  $[\text{S-L2PdH}]^+$ . Starting from complex **S-2D**+ $\text{CH}_3\text{OH}$ ,  $\text{CH}_3\text{OH}$  coordination is endergonic by 68.6 kJ/mol; and methanolysis has barrier of 126.3 kJ/mol and is exergonic by 38.2 kJ/mol. On the basis of the potential surfaces, one can see that acyl complex **S-2D** is the resting state; and methanolysis represents the rate-determining step; and the effective barrier is 126.3 kJ/mol, which is much lower than that (177.2 kJ/mol) for **L1Pd** in methanol solution by 50.9 kcal/mol. This indicates that **L2Pd** is also more active than **L1Pd** in methanol solution. It is noted that the reported transition state has the lowest energy among several conformations on the basis of different orientations among methanol, acyl group and ligand.

Taking dispersion into consideration,  $[\text{NH-L2Pd}]^+$  (**S-D3-N-2A**) is more strongly stabilized than  $[\text{L2PdH}]^+$  (**S-D3-2A**) by 18.6 kJ/mol. The formation of the ethyl complex  $[\text{L2Pd}(\text{CH}_2\text{CH}_3)]^+$  (**S-D3-2B**) is exergonic by 70.4 kJ/mol from **S-D3-2A**. The CO coordination to form complex  $[\text{L2Pd}(\text{CO})(\text{CH}_2\text{CH}_3)]^+$  (**S-D3-2C**) is exergonic by 7.2 kJ/mol, and the following CO insertion has energy barrier of 17.2 kJ/mol and the formation of  $[\text{L2Pd}(-\text{CO}-\text{CH}_2\text{CH}_3)]^+$  (**S-D3-2D**) is exergonic by 86.8 kJ/mol. Starting from the acyl complex **S-D3-2D**, further CO coordination  $[\text{L2Pd}(\text{CO})(-\text{CO}-\text{CH}_2\text{CH}_3)]^+$  (**S-2D-CO**) is exergonic by 7.5 kJ/mol, while  $\text{CH}_3\text{OH}$  coordination  $[\text{L2Pd}(\text{CH}_3\text{OH})(-\text{CO}-\text{CH}_2\text{CH}_3)]^+$  (**S-2D-CH<sub>3</sub>OH**) is endergonic by 29.9 kJ/mol. Starting from the resting state of **S-2D-CO**, the methanolysis has barrier of 98.9 kJ/mol and is endergonic by 2.4 kJ/mol.

Compared with the potential energy surface without dispersion, all species were further stabilized, except for  $[\text{L2PdH}]^+$  (**S-D3-2A**). It is also found that the CO coordinated ethyl  $[\text{L2Pd}(\text{CO})(\text{CH}_2\text{CH}_3)]^+$  (**S-D3-2C**) and acyl  $[\text{L2Pd}(\text{CO})(-\text{CO}-\text{CH}_2\text{CH}_3)]^+$  (**S-2D-CO**) complexes become more stable than that without CO coordination, and this is also the opposite to the results in gas and methanol without dispersion. And the effective barrier is 124.8 kJ/mol in gas phase, 126.3 kJ/mol in methanol and 98.9 kJ/mol in methanol solution including dispersion.

In addition, we also compared the theoretical and experimental results in gas phase and in methanol solution as well as in methanol solution including GD3BJ dispersion by single point calculation, as shown in Table S2.

Table S2. Effective barriers calculated in gas phase and in methanol solution as well as including GD3BJ dispersion by using L2 as ligand.

| $E_{eff}$                                    | Gas    | Methanol | Methanol-D3(SP) | exp. |
|----------------------------------------------|--------|----------|-----------------|------|
| $\Delta G/(\text{kJ mol}^{-1})$              | 124.8  | 126.3    | 98.9            | --   |
| $\Delta H/(\text{kJ mol}^{-1})$              | 66.9   | 67.0     | 86.1            | 41.9 |
| $\Delta S/(\text{J mol}^{-1} \text{K}^{-1})$ | -194.2 | -198.9   | -42.9           | --   |

Qualitatively, all results are in agreement with the experiment. The negative value of the entropy barriers in gas phase (-194.2 kJ/mol) and in methanol solution (-198.9 kJ/mol) as well as including GD3BJ dispersion (-42.9 kJ/mol) are reasonable as the transition state is more ordered. The highly corrected CCSD(T) method might give reasonable results, but it is not applicable for such larger systems. On the other hand, we are more interested in the difference between L1Pd and L2Pd systems rather than their absolute values.

### (e) Comparison between L1Pd and L2Pd.

To show the significant difference in activity of the currently used industrial ligand L1 and our ligand L2, we compared the effective and apparent barriers in gas phase and in methanol solution as well as in methanol solution including van der Waals dispersion correction (Table S3). It shows that the computed effective barrier of the L1Pd system in gas phase and in methanol solution as well as in methanol solution including van der Waals dispersion correction (155.1, 177.2 and 170.8 kJ/mol, respectively) are higher than those (124.8, 126.3 and 98.9 kJ/mol, respectively) of the L2Pd system by 30.3, 50.9 and 71.9 kJ/mol, respectively.

Table S3. Comparison between L1Pd and L2Pd system in effective ( $\Delta G_{eff}$ ) and apparent ( $\Delta G_{app}$ ) free energy barriers (kJ/mol)

| $\Delta G$      | L1Pd             | L2Pd             | L1Pd-L2Pd                         | L1Pd             | L2Pd             | L1Pd-L2Pd                         |
|-----------------|------------------|------------------|-----------------------------------|------------------|------------------|-----------------------------------|
|                 | $\Delta G_{eff}$ | $\Delta G_{eff}$ | $\Delta G_{eff} - \Delta G_{eff}$ | $\Delta G_{app}$ | $\Delta G_{app}$ | $\Delta G_{app} - \Delta G_{app}$ |
| Gas             | 155.1            | 124.8            | 30.3                              | 99.0             | 40.5             | 58.5                              |
| Methanol        | 177.2            | 126.3            | 50.9                              | 107.7            | 42.7             | 65.0                              |
| Methanol-D3(SP) | 170.8            | 98.9             | 71.9                              | 36.7             | -54.2            | 90.9                              |

It also shows that the computed apparent barrier of the L1Pd system in gas phase and in methanol solution as well as in methanol solution including van der Waals dispersion correction (99.0, 107.7 and 36.7 kJ/mol, respectively) are higher than those (40.5, 42.7 and -54.2 kJ/mol, respectively) of the L2Pd system by 58.5, 65.0 and 90.9 kJ/mol, respectively. It is noted that including dispersion lowers both effective and apparent energy barriers, however, the negative apparent free energy barrier for L2Pd system is unreasonable.

Consequently, all these calculation results show that the L2Pd system has both lower effective and apparent barriers than the L1Pd system; and therefore the L2Pd system is more active than the L1Pd system. This is qualitatively in full agreement with the experimental observation.



**Table S4.** The Cartesian Coordinates (xyz) for All Optimized Structures

| <b>B3PW91-gas phase</b>                              | <b>B3PW91-SCRF-methanol</b>                            |
|------------------------------------------------------|--------------------------------------------------------|
| <b>CO</b>                                            | <b>S-CO</b>                                            |
| C 0.00000000 0.00000000 -0.64366200                  | C 0.00000000 0.00000000 -0.64334700                    |
| O 0.00000000 0.00000000 0.48274700                   | O 0.00000000 0.00000000 0.48251000                     |
| <b>CH<sub>3</sub>OH</b>                              | <b>S-CH<sub>3</sub>OH</b>                              |
| C 0.04654900 0.66052000 0.00000000                   | C 0.04772500 0.66650000 0.00000000                     |
| H 1.08923700 0.97933700 0.00000000                   | H 1.08945100 0.99087300 0.00000000                     |
| H -0.43789900 1.07873600 0.89167400                  | H -0.44418500 1.07128400 0.89145300                    |
| H -0.43789900 1.07873600 -0.89167400                 | H -0.44418500 1.07128400 -0.89145300                   |
| O 0.04654900 -0.75523400 0.00000000                  | O 0.04772500 -0.75957400 0.00000000                    |
| H -0.86512200 -1.05805600 0.00000000                 | H -0.86923700 -1.05584500 0.00000000                   |
| <b>(CH<sub>3</sub>OH)<sub>3</sub></b>                | <b>S-(CH<sub>3</sub>OH)<sub>3</sub></b>                |
| O 0.70322300 -1.34359000 -0.49595500                 | O -2.29117100 -0.51716200 -0.70063000                  |
| C 1.33494200 -2.37717800 0.23405700                  | C -3.04871600 -0.98591300 0.40520700                   |
| H 2.34622000 -2.48977900 -0.15892400                 | H -3.94062600 -1.48224300 0.01668400                   |
| H 1.40201400 -2.15033300 1.30500800                  | H -2.48871000 -1.71111700 1.00845000                   |
| H 0.81400300 -3.33395400 0.11289500                  | H -3.37078100 -0.16648300 1.05951800                   |
| H -0.19540400 -1.19001400 -0.14289300                | H -1.48878200 -0.06931900 -0.35170100                  |
| O -1.52488500 -0.05340300 0.46919500                 | O -0.07817500 0.74233800 0.32549300                    |
| C -2.79860300 0.15368200 -0.11335200                 | C -0.04093400 2.13936900 0.05272700                    |
| H -3.30222400 1.02605000 0.31845000                  | H 0.81037500 2.61864600 0.54773200                     |
| H -2.74084500 0.28456500 -1.20020300                 | H 0.01653400 2.34106700 -1.02261800                    |
| H -3.40536300 -0.72780600 0.09723800                 | H -0.96029400 2.58056400 0.44109200                    |
| H -0.94640900 0.70923100 0.27195800                  | H 0.75045500 0.33505100 -0.01404800                    |
| O 0.63295100 1.41282300 -0.39578100                  | O 2.25634900 -0.35894700 -0.59380700                   |
| H 0.97440100 0.50772200 -0.53095900                  | H 2.07959500 -1.00612400 -1.28681400                   |
| C 1.61949400 2.20914400 0.23135000                   | C 3.04583300 -0.98343900 0.42100200                    |
| H 2.51887500 2.30008000 -0.38837500                  | H 4.00488500 -1.32271900 0.01856600                    |
| H 1.20053100 3.20649000 0.36967900                   | H 3.23173300 -0.23426200 1.19078500                    |
| H 1.90889300 1.81722000 1.21412600                   | H 2.52249700 -1.83299900 0.87028900                    |
| <b>C<sub>2</sub>H<sub>4</sub></b>                    | <b>S-C<sub>2</sub>H<sub>4</sub></b>                    |
| C 0.00000000 0.66233600 0.00000000                   | C 0.00000000 0.66303200 0.00000000                     |
| H 0.92286000 1.23317800 0.00000000                   | H 0.92428900 1.23438200 0.00000000                     |
| H -0.92281500 1.23323000 0.00000000                  | H -0.92423700 1.23444400 0.00000000                    |
| C 0.00000000 -0.66233600 0.00000000                  | C 0.00000000 -0.66303200 0.00000000                    |
| H -0.92286000 -1.23317800 0.00000000                 | H -0.92428900 -1.23438200 0.00000000                   |
| H 0.92281500 -1.23323000 0.00000000                  | H 0.92423700 -1.23444400 0.00000000                    |
| <b>CH<sub>3</sub>OCOCH<sub>2</sub>CH<sub>3</sub></b> | <b>S-CH<sub>3</sub>OCOCH<sub>2</sub>CH<sub>3</sub></b> |
| H 2.56694300 -0.56886200 0.87895300                  | H 2.57056700 -0.61088300 0.88377400                    |
| C 0.70130200 -1.23112300 0.00000000                  | C 0.69063200 -1.23535600 0.00000000                    |
| C 2.21486300 -1.11089800 0.00000000                  | C 2.20438000 -1.13828500 0.00000000                    |
| H 2.56694300 -0.56886200 -0.87895300                 | H 2.57056700 -0.61088300 -0.88377400                   |
| C 0.00000000 0.10428200 0.00000000                   | C 0.00000000 0.09821400 0.00000000                     |
| O 0.53592300 1.18278700 0.00000000                   | O 0.55046800 1.18063100 0.00000000                     |
| O -1.33822600 -0.05582000 0.00000000                 | O -1.33113900 -0.03651000 0.00000000                   |
| C -2.10739500 1.15002400 0.00000000                  | C -2.10524100 1.17505200 0.00000000                    |
| H -1.89058400 1.74645900 0.88746100                  | H -1.89294400 1.76406200 0.89336100                    |
| H -1.89058400 1.74645900 -0.88746100                 | H -1.89294400 1.76406200 -0.89336100                   |

|               |             |             |               |             |             |
|---------------|-------------|-------------|---------------|-------------|-------------|
| H -3.14859500 | 0.83537200  | 0.00000000  | H -3.14541100 | 0.85645000  | 0.00000000  |
| H 0.34345100  | -1.78947600 | 0.87070000  | H 0.32767300  | -1.78719500 | 0.87312900  |
| H 0.34345100  | -1.78947600 | -0.87070000 | H 0.32767300  | -1.78719500 | -0.87312900 |
| H 2.67477800  | -2.10106400 | 0.00000000  | H 2.64156200  | -2.13912800 | 0.00000000  |
| <b>1A</b>     |             |             | <b>S-1A</b>   |             |             |
| Pd 0.06946100 | -1.26799100 | 0.81346900  | Pd 0.06181000 | -1.31779700 | 0.83429000  |
| P -1.98351600 | -0.30527800 | -0.06088900 | P -1.94185000 | -0.28338700 | -0.07515600 |
| P 1.93987700  | -0.36589500 | -0.02309700 | P 1.88705600  | -0.36495500 | -0.03000600 |
| C -1.70562000 | 1.01835400  | -1.35600000 | C -1.71736000 | 1.08294000  | -1.32777500 |
| C 1.40272200  | 0.83361400  | -1.37390200 | C 1.38295000  | 0.85634500  | -1.36637600 |
| C 0.62533100  | 2.09842000  | -1.11245200 | C 0.62712000  | 2.13087100  | -1.09380300 |
| C 1.36068700  | 3.28633400  | -1.02441900 | C 1.37934300  | 3.30918000  | -1.00367400 |
| C 0.75913700  | 4.52462600  | -0.88749200 | C 0.79410500  | 4.55471500  | -0.84808800 |
| C -0.62542100 | 4.60376900  | -0.86638900 | C -0.59034200 | 4.65124200  | -0.80518600 |
| C -1.36937100 | 3.44340400  | -0.98820000 | C -1.35155000 | 3.50042400  | -0.92814300 |
| C -0.77940400 | 2.18007800  | -1.10365600 | C -0.77704700 | 2.23100000  | -1.06972400 |
| H 2.44203200  | 3.23861000  | -1.08732100 | H 2.45931400  | 3.24104300  | -1.07115500 |
| H 1.36623100  | 5.41994600  | -0.82489000 | H 1.41487200  | 5.44173500  | -0.78079900 |
| H -1.12345600 | 5.56259500  | -0.78369600 | H -1.07626800 | 5.61531000  | -0.69888600 |
| H -2.45148600 | 3.51698600  | -1.02028800 | H -2.43360600 | 3.58254400  | -0.93494100 |
| H 2.33097200  | 1.11144100  | -1.87690700 | H 2.31953200  | 1.12921200  | -1.85540100 |
| H 0.86226900  | 0.18201600  | -2.06496300 | H 0.83037700  | 0.22591100  | -2.06779500 |
| H -1.35296600 | 0.45096800  | -2.22254300 | H -1.39388300 | 0.55180400  | -2.22830300 |
| H -2.68463600 | 1.41205200  | -1.63382600 | H -2.70590500 | 1.49005800  | -1.54641100 |
| C 2.95003600  | -1.63762700 | -1.03621600 | C 2.90315500  | -1.62365300 | -1.05730200 |
| C 2.94500500  | 0.55969500  | 1.30422200  | C 2.91027200  | 0.54150900  | 1.29975800  |
| C -2.98020500 | -1.58717900 | -1.06950500 | C -2.92487900 | -1.55228900 | -1.11136600 |
| C -2.99129400 | 0.42978500  | 1.37754300  | C -2.97005800 | 0.39922600  | 1.37352800  |
| H 1.40679800  | -1.88504900 | 1.35928100  | H 1.35634400  | -1.98145300 | 1.41636100  |
| C -2.96295800 | -0.59178600 | 2.52360000  | C -2.92997100 | -0.64335400 | 2.49776200  |
| H -3.47147100 | -0.16407400 | 3.39283600  | H -3.43232100 | -0.23103400 | 3.37967400  |
| H -3.46185500 | -1.52897900 | 2.28235700  | H -3.43316400 | -1.57417900 | 2.23831900  |
| H -1.93564100 | -0.81569100 | 2.83219200  | H -1.89913100 | -0.87705500 | 2.78625200  |
| C -4.43389300 | 0.79638800  | 1.03166900  | C -4.41481700 | 0.74800900  | 1.02553200  |
| H -4.88489300 | 1.30787500  | 1.88750200  | H -4.87794700 | 1.24175300  | 1.88736600  |
| H -4.49875400 | 1.47752700  | 0.18019600  | H -4.48139400 | 1.43648100  | 0.17979200  |
| H -5.04878600 | -0.07932600 | 0.82093500  | H -5.01044000 | -0.13750900 | 0.79894700  |
| C -2.24889500 | 1.68102500  | 1.85904100  | C -2.25632700 | 1.65390500  | 1.88615200  |
| H -2.67192500 | 1.99168100  | 2.81891700  | H -2.70109000 | 1.94046900  | 2.84514300  |
| H -1.18411200 | 1.49077900  | 2.01133400  | H -1.19022300 | 1.47969000  | 2.05357300  |
| H -2.34559200 | 2.51615900  | 1.16874900  | H -2.36312600 | 2.49766100  | 1.20627000  |
| C 1.99154600  | 1.56170600  | 1.96872400  | C 1.97131500  | 1.54701500  | 1.97597600  |
| H 2.54736300  | 2.10165300  | 2.74073900  | H 2.53279800  | 2.06394600  | 2.76101700  |
| H 1.58163500  | 2.29596000  | 1.27874500  | H 1.58307200  | 2.30099200  | 1.29412400  |
| H 1.16424100  | 1.04491800  | 2.46041600  | H 1.12736100  | 1.03858200  | 2.44928600  |
| C 4.14174400  | 1.28029600  | 0.67611400  | C 4.11237500  | 1.25291000  | 0.67542300  |
| H 4.61855700  | 1.89753200  | 1.44244800  | H 4.59374800  | 1.86311200  | 1.44651500  |
| H 4.89543700  | 0.58160000  | 0.31057000  | H 4.85474300  | 0.54258100  | 0.30756500  |
| H 3.85864300  | 1.94458800  | -0.14043400 | H 3.83368200  | 1.91823400  | -0.14205100 |
| C 3.43901500  | -0.38582500 | 2.40338400  | C 3.40116300  | -0.40965600 | 2.39394500  |
| H 4.18773100  | -1.09627000 | 2.06257300  | H 4.14046500  | -1.12604600 | 2.04342200  |
| H 3.90019500  | 0.22575400  | 3.18416200  | H 3.87481600  | 0.19952800  | 3.17086600  |
| H 2.61801800  | -0.93783400 | 2.86419900  | H 2.57760000  | -0.95583100 | 2.85806900  |
| C -3.54922600 | -2.65124100 | -0.12659400 | C -3.49617300 | -2.63571400 | -0.19429000 |

|               |             |             |               |             |             |
|---------------|-------------|-------------|---------------|-------------|-------------|
| H -3.95416200 | -3.47407900 | -0.72264200 | H -3.87672300 | -3.45536500 | -0.81313300 |
| H -2.78244800 | -3.07185400 | 0.53034400  | H -2.73340900 | -3.05144500 | 0.47065500  |
| H -4.36276300 | -2.26954500 | 0.49018700  | H -4.32661200 | -2.27234600 | 0.41233000  |
| C -1.97974800 | -2.27521700 | -2.00811700 | C -1.90861000 | -2.21814300 | -2.04729300 |
| H -1.17388100 | -2.76145800 | -1.45499700 | H -1.12339000 | -2.72955900 | -1.48685900 |
| H -2.50414700 | -3.04400500 | -2.58317800 | H -2.42911500 | -2.96341500 | -2.65840800 |
| H -1.53516800 | -1.58728800 | -2.73108800 | H -1.43739400 | -1.50908700 | -2.73206400 |
| C -4.10913400 | -0.98511700 | -1.91117100 | C -4.04670400 | -0.94647500 | -1.95741600 |
| H -4.62629600 | -1.79601900 | -2.43315700 | H -4.54081400 | -1.75519300 | -2.50738700 |
| H -4.85171300 | -0.46012200 | -1.31239200 | H -4.80716400 | -0.44690400 | -1.35786800 |
| H -3.73970500 | -0.30238700 | -2.67806600 | H -3.67103800 | -0.23781500 | -2.69807900 |
| C 3.83281200  | -2.48923300 | -0.12274500 | C 3.79268300  | -2.47976800 | -0.15684300 |
| H 4.21944500  | -3.32927700 | -0.70633500 | H 4.18537700  | -3.30656900 | -0.75748700 |
| H 4.69285000  | -1.93649300 | 0.25447100  | H 4.64636700  | -1.92119300 | 0.22744400  |
| H 3.27907900  | -2.90612800 | 0.72099700  | H 3.24241200  | -2.91356000 | 0.68137900  |
| C 3.82491700  | -0.97096700 | -2.10742300 | C 3.77452300  | -0.95010600 | -2.12468300 |
| H 4.44199700  | -1.74601100 | -2.57013200 | H 4.38944100  | -1.72560300 | -2.59251800 |
| H 3.23671800  | -0.51702500 | -2.90574700 | H 3.18135600  | -0.48994800 | -2.91624500 |
| H 4.50264900  | -0.21939800 | -1.70223800 | H 4.45066500  | -0.20017800 | -1.71329100 |
| C 1.93871200  | -2.56048300 | -1.72742100 | C 1.89491200  | -2.54073700 | -1.75714100 |
| H 1.36140100  | -3.13760900 | -1.00202600 | H 1.30688000  | -3.11543200 | -1.03746200 |
| H 1.24498700  | -2.02036500 | -2.37437400 | H 1.21240300  | -1.98961800 | -2.40683300 |
| H 2.48703800  | -3.26610000 | -2.35826500 | H 2.44869800  | -3.24689900 | -2.38474600 |
| <b>1B</b>     |             |             | <b>S-1B</b>   |             |             |
| Pd 0.08432300 | -1.32788400 | -0.58761000 | Pd 0.07349000 | -1.32243900 | -0.58869700 |
| P 1.88062500  | -0.06630900 | 0.21978700  | P 1.86852500  | -0.07505000 | 0.21613400  |
| P -1.91293600 | -0.20611600 | 0.21768800  | P -1.90446400 | -0.18751400 | 0.22183300  |
| C 1.36510100  | 1.43021000  | 1.23683500  | C 1.35842400  | 1.41688600  | 1.24050500  |
| C -1.68334100 | 1.31636200  | 1.28093900  | C -1.69634400 | 1.34621900  | 1.26798300  |
| C -0.90763000 | 2.49742000  | 0.76753200  | C -0.89960000 | 2.51410200  | 0.75829000  |
| C -1.63433200 | 3.64517300  | 0.43751000  | C -1.60924700 | 3.67029500  | 0.41380900  |
| C -1.01944300 | 4.81895100  | 0.03709900  | C -0.97499000 | 4.83830600  | 0.02311100  |
| C 0.36519700  | 4.87360900  | -0.00507400 | C 0.41242500  | 4.87763100  | 0.00159000  |
| C 1.09960300  | 3.75431000  | 0.35027400  | C 1.12933400  | 3.74796400  | 0.36407000  |
| C 0.49630100  | 2.54725700  | 0.71728500  | C 0.50689500  | 2.54643900  | 0.72264700  |
| H -2.71625500 | 3.61901300  | 0.51453700  | H -2.69290400 | 3.64831700  | 0.46749600  |
| H -1.61576400 | 5.68941500  | -0.20982600 | H -1.55927500 | 5.71435700  | -0.23777900 |
| H 0.87399900  | 5.78985600  | -0.28051700 | H 0.93720900  | 5.78774700  | -0.26898000 |
| H 2.17849900  | 3.83916400  | 0.38625800  | H 2.20949800  | 3.81279500  | 0.40790900  |
| H -2.67739400 | 1.65782300  | 1.57007100  | H -2.69583500 | 1.69822700  | 1.52328500  |
| H -1.22095800 | 0.92496400  | 2.19232100  | H -1.25269700 | 0.96727500  | 2.19386200  |
| H 0.87870700  | 0.98116100  | 2.10318700  | H 0.84954400  | 0.96189600  | 2.09078400  |
| H 2.29954700  | 1.85990300  | 1.60506200  | H 2.29079900  | 1.83562400  | 1.62560700  |
| C -2.90764400 | -1.31004800 | 1.43604300  | C -2.90325000 | -1.28459100 | 1.44050400  |
| C -2.95694500 | 0.32509300  | -1.29456300 | C -2.95046900 | 0.31731900  | -1.29829700 |
| C 2.86920300  | -1.03538500 | 1.56098900  | C 2.85014600  | -1.04958400 | 1.55919900  |
| C 3.02504800  | 0.58184400  | -1.16908500 | C 3.02539900  | 0.56813800  | -1.16653000 |
| C 1.16172800  | -2.70509000 | -1.72524200 | C 1.14088800  | -2.70042200 | -1.72225600 |
| C -0.16341500 | -3.35140100 | -1.80562100 | C -0.16999000 | -3.38193800 | -1.75955700 |
| H 1.51258900  | -2.23811900 | -2.64078300 | H 1.45218900  | -2.23255600 | -2.65290000 |
| H -0.57453700 | -3.42575300 | -2.81268600 | H -0.59373000 | -3.49615800 | -2.75859000 |
| H 1.93689500  | -3.24961400 | -1.20184400 | H 1.94538500  | -3.22257500 | -1.21943800 |
| C 3.91768000  | -0.53971100 | -1.70718600 | C 3.89819700  | -0.56318700 | -1.71425800 |
| H 4.42376600  | -0.17460400 | -2.60557300 | H 4.41697900  | -0.19126000 | -2.60422000 |

|                |             |             |                |             |             |
|----------------|-------------|-------------|----------------|-------------|-------------|
| H 4.69272200   | -0.82569600 | -0.99566800 | H 4.66033600   | -0.87407100 | -0.99877300 |
| H 3.36023800   | -1.43040600 | -1.98695900 | H 3.32457500   | -1.43857100 | -2.01135800 |
| C 3.92761300   | 1.73881600  | -0.73117800 | C 3.94842600   | 1.70590100  | -0.72542100 |
| H 4.55656800   | 2.02005600  | -1.58103200 | H 4.57743000   | 1.98032300  | -1.57926900 |
| H 3.36014400   | 2.62217400  | -0.45246300 | H 3.39992600   | 2.59785700  | -0.43373900 |
| H 4.59307500   | 1.47654800  | 0.08916600  | H 4.61209200   | 1.42397400  | 0.09043500  |
| C 2.09514000   | 1.07443800  | -2.28553500 | C 2.10613000   | 1.08025900  | -2.28147700 |
| H 2.70268200   | 1.46359100  | -3.10797900 | H 2.72440300   | 1.46008100  | -3.10189600 |
| H 1.47352500   | 0.26753100  | -2.67832700 | H 1.46875000   | 0.28662200  | -2.67754100 |
| H 1.43906300   | 1.87955600  | -1.94935100 | H 1.46662600   | 1.89823200  | -1.94297300 |
| C -2.11376300  | 1.32968500  | -2.09315200 | C -2.13152300  | 1.34631200  | -2.08786700 |
| H -2.62364300  | 1.53412800  | -3.03947600 | H -2.62378700  | 1.51352500  | -3.05193800 |
| H -1.97554900  | 2.27717000  | -1.57882200 | H -2.05869200  | 2.30642100  | -1.58181200 |
| H -1.12729600  | 0.92343100  | -2.32986600 | H -1.11889300  | 0.98609600  | -2.28944000 |
| C -4.29772200  | 0.95303500  | -0.91354200 | C -4.31183700  | 0.90788800  | -0.93677800 |
| H -4.77412800  | 1.35028400  | -1.81501100 | H -4.79187700  | 1.27577800  | -1.85071800 |
| H -4.98577100  | 0.22594000  | -0.48041800 | H -4.97652100  | 0.16235100  | -0.49733400 |
| H -4.18979800  | 1.78506600  | -0.21546000 | H -4.23286300  | 1.75229700  | -0.24831600 |
| C -3.19464000  | -0.87331700 | -2.22135100 | C -3.13713700  | -0.88893300 | -2.22504700 |
| H -3.77068600  | -1.67609800 | -1.76709900 | H -3.71743800  | -1.69533400 | -1.78115900 |
| H -3.75362400  | -0.52486600 | -3.09481700 | H -3.67203300  | -0.55180300 | -3.11962200 |
| H -2.25215600  | -1.28356500 | -2.59000500 | H -2.17526700  | -1.29179100 | -2.55038300 |
| C 3.16833300   | -2.45519000 | 1.07410500  | C 3.13351000   | -2.47265200 | 1.07530200  |
| H 3.76630600   | -2.96486000 | 1.83501800  | H 3.72376700   | -2.98445400 | 1.84265900  |
| H 2.24823600   | -3.02481200 | 0.93932900  | H 2.20819700   | -3.03389100 | 0.93645800  |
| H 3.73373300   | -2.48048100 | 0.14380200  | H 3.70146200   | -2.50543000 | 0.14623100  |
| C 1.99034000   | -1.16048600 | 2.81323600  | C 1.97092900   | -1.16261800 | 2.81069100  |
| H 0.98469000   | -1.51059900 | 2.57337400  | H 0.96143200   | -1.50346100 | 2.57246500  |
| H 2.44314700   | -1.89979000 | 3.47985600  | H 2.42117700   | -1.90474000 | 3.47786700  |
| H 1.91833100   | -0.22922200 | 3.37640500  | H 1.90428500   | -0.22718300 | 3.36828900  |
| C 4.18094200   | -0.34654800 | 1.94791900  | C 4.16916900   | -0.37701400 | 1.94455300  |
| H 4.61693900   | -0.88757300 | 2.79325200  | H 4.59363400   | -0.92332100 | 2.79404100  |
| H 4.91604600   | -0.36499100 | 1.14356200  | H 4.90306500   | -0.40963100 | 1.13873800  |
| H 4.04162800   | 0.68674000  | 2.27028000  | H 4.04097100   | 0.66025300  | 2.25946600  |
| C -3.62254000  | -2.44464400 | 0.69880200  | C -3.61817600  | -2.41474200 | 0.69856600  |
| H -4.00180600  | -3.15635600 | 1.43785700  | H -3.99601000  | -3.12914000 | 1.43776200  |
| H -4.47972300  | -2.09157500 | 0.12513200  | H -4.47465400  | -2.05410500 | 0.12702500  |
| H -2.95794200  | -2.99730200 | 0.03105100  | H -2.95248300  | -2.96055100 | 0.02563800  |
| C -3.93581800  | -0.54077500 | 2.27381600  | C -3.92939200  | -0.51376300 | 2.27662300  |
| H -4.48908100  | -1.25791400 | 2.88755200  | H -4.47870900  | -1.23262900 | 2.89441300  |
| H -3.46958300  | 0.16775600  | 2.95942700  | H -3.45950700  | 0.19947900  | 2.95582400  |
| H -4.66564600  | -0.00562600 | 1.66645600  | H -4.66069800  | 0.01825800  | 1.66716600  |
| C -1.87687600  | -1.93413900 | 2.38552100  | C -1.87675200  | -1.90990300 | 2.39244300  |
| H -1.15496800  | -2.55716100 | 1.85165200  | H -1.15932800  | -2.54148400 | 1.86196800  |
| H -1.32873200  | -1.18233800 | 2.95780600  | H -1.32300800  | -1.15727500 | 2.95861700  |
| H -2.39661800  | -2.56930000 | 3.10913900  | H -2.40516100  | -2.53856200 | 3.11752300  |
| H -0.24018600  | -4.29799200 | -1.27296500 | H -0.20739700  | -4.31563900 | -1.19903900 |
| H -0.99215000  | -2.70246000 | -1.28493600 | H -1.00342900  | -2.74737800 | -1.24814400 |
| <b>1C</b>      |             |             | <b>S-1C</b>    |             |             |
| Pd -0.11772700 | -1.32149500 | -0.48524200 | Pd -0.10877900 | -1.31745100 | -0.46814400 |
| P -1.91016500  | 0.17811700  | 0.19051800  | P -1.91227500  | 0.18051100  | 0.19512500  |
| P 1.90375800   | -0.07029100 | 0.33033700  | P 1.89498000   | -0.06108700 | 0.34174300  |
| C -1.35288900  | 1.73735500  | 1.08057800  | C -1.37194600  | 1.74700400  | 1.07626600  |
| C 1.65478400   | 1.50941100  | 1.31156700  | C 1.63986100   | 1.51422700  | 1.32438800  |

|   |             |             |             |   |             |             |             |
|---|-------------|-------------|-------------|---|-------------|-------------|-------------|
| C | 0.98138600  | 2.69214300  | 0.67120500  | C | 0.97066600  | 2.69524300  | 0.67966900  |
| C | 1.75111000  | 3.81110900  | 0.34107100  | C | 1.74443500  | 3.81309400  | 0.34913400  |
| C | 1.19093100  | 4.96380300  | -0.18383000 | C | 1.18894400  | 4.96433600  | -0.18663200 |
| C | -0.18292400 | 5.03165400  | -0.35750500 | C | -0.18475400 | 5.03040600  | -0.37463700 |
| C | -0.96475600 | 3.95284000  | 0.01923100  | C | -0.97083600 | 3.95262100  | 0.00053100  |
| C | -0.41235800 | 2.77095300  | 0.52258400  | C | -0.42335600 | 2.77375500  | 0.51994600  |
| H | 2.81618200  | 3.79611900  | 0.53820600  | H | 2.80853100  | 3.79280200  | 0.55183600  |
| H | 1.82124600  | 5.81116300  | -0.42661200 | H | 1.82339800  | 5.80959700  | -0.43132400 |
| H | -0.64768800 | 5.93045300  | -0.74525400 | H | -0.64692700 | 5.92548100  | -0.77715800 |
| H | -2.04269100 | 4.04155700  | -0.05424900 | H | -2.04799200 | 4.03359500  | -0.08927800 |
| H | 2.63637200  | 1.81116500  | 1.68187400  | H | 2.61642400  | 1.81667100  | 1.70689400  |
| H | 1.08224200  | 1.19192400  | 2.18442400  | H | 1.05083300  | 1.19477100  | 2.18543600  |
| H | -0.95438800 | 1.35244300  | 2.02309800  | H | -0.98407900 | 1.37009200  | 2.02649600  |
| H | -2.27658100 | 2.25132300  | 1.34119100  | H | -2.29826000 | 2.26727100  | 1.31452800  |
| C | 2.72496400  | -1.19063700 | 1.65692900  | C | 2.68111500  | -1.19454200 | 1.67468600  |
| C | 3.13721500  | 0.38518200  | -1.06486000 | C | 3.16090700  | 0.37915700  | -1.02815000 |
| C | -3.08547300 | -0.49469900 | 1.57912400  | C | -3.12590600 | -0.48138000 | 1.55724000  |
| C | -2.85603900 | 0.78683100  | -1.35791400 | C | -2.83241500 | 0.75483900  | -1.37980900 |
| C | -1.58243400 | -2.81512400 | -1.00152200 | C | -1.53761100 | -2.85569300 | -0.92582200 |
| C | -1.38816100 | -4.07067800 | -0.17474600 | C | -1.20530900 | -4.11818900 | -0.15472900 |
| H | -2.55266900 | -2.37193300 | -0.83230400 | H | -2.50975200 | -2.47086200 | -0.65221800 |
| H | -0.46021500 | -4.59759300 | -0.40456000 | H | -0.29599100 | -4.60640200 | -0.51350800 |
| H | -1.39435300 | -3.87639200 | 0.89955300  | H | -1.08078800 | -3.94083000 | 0.91631000  |
| C | 0.91009300  | -2.57912700 | -1.54355700 | C | 0.89701800  | -2.48975700 | -1.62094300 |
| O | 1.37111700  | -3.32200400 | -2.26280300 | O | 1.32981900  | -3.16419100 | -2.42454600 |
| H | -2.20731400 | -4.77263300 | -0.37336700 | H | -2.02385800 | -4.84307500 | -0.26206000 |
| H | -1.50721900 | -3.01658700 | -2.07042500 | H | -1.54505700 | -3.03072400 | -2.00239700 |
| C | 2.28652800  | 0.96551300  | -2.20246300 | C | 2.33945400  | 0.93010500  | -2.19994900 |
| H | 2.94517800  | 1.27271200  | -3.02046800 | H | 3.02317000  | 1.24741900  | -2.99491100 |
| H | 1.58621000  | 0.22745800  | -2.60008900 | H | 1.67371800  | 0.16980500  | -2.61587200 |
| H | 1.71923200  | 1.84281300  | -1.88822500 | H | 1.73856900  | 1.79627300  | -1.91538200 |
| C | 4.18033500  | 1.42177500  | -0.63849500 | C | 4.18510300  | 1.42766900  | -0.58956000 |
| H | 4.76805300  | 1.10786900  | 0.22308700  | H | 4.73825300  | 1.13192200  | 0.30167500  |
| H | 4.87648500  | 1.56959900  | -1.46954300 | H | 4.91096600  | 1.55592500  | -1.39991900 |
| H | 3.73447200  | 2.38880200  | -0.42602200 | H | 3.73201400  | 2.39884700  | -0.41123300 |
| C | 3.88515300  | -0.84432500 | -1.58664600 | C | 3.93499500  | -0.84919300 | -1.51181100 |
| H | 4.59554600  | -1.24198700 | -0.86141200 | H | 4.64424700  | -1.21224800 | -0.76714000 |
| H | 3.22676700  | -1.64991700 | -1.90424500 | H | 3.29480200  | -1.67617200 | -1.81175500 |
| H | 4.46035100  | -0.54251600 | -2.46688400 | H | 4.51195700  | -0.55393100 | -2.39481800 |
| C | -1.81270700 | 1.44833300  | -2.26911400 | C | -1.78804200 | 1.42079100  | -2.28383900 |
| H | -2.29963400 | 1.72912900  | -3.20774700 | H | -2.26547500 | 1.67191700  | -3.23703800 |
| H | -1.37126100 | 2.34592400  | -1.84251500 | H | -1.38009700 | 2.33904700  | -1.86612000 |
| H | -1.00701300 | 0.75091200  | -2.51143000 | H | -0.96016500 | 0.73882400  | -2.49614300 |
| C | -3.96439400 | 1.77890700  | -0.99670400 | C | -3.96633000 | 1.73085600  | -1.06389100 |
| H | -4.37109900 | 2.20009800  | -1.92093900 | H | -4.37633000 | 2.10277300  | -2.00917000 |
| H | -4.79112700 | 1.29642500  | -0.47333900 | H | -4.78088700 | 1.24853400  | -0.52123400 |
| H | -3.61500300 | 2.61379900  | -0.39020400 | H | -3.63658600 | 2.59622800  | -0.48939200 |
| C | -3.47254100 | -0.36361600 | -2.16098500 | C | -3.39946500 | -0.42901900 | -2.16802700 |
| H | -2.71058000 | -1.03315800 | -2.55638600 | H | -2.60851500 | -1.09434100 | -2.51345200 |
| H | -4.20160900 | -0.94978100 | -1.60375100 | H | -4.13148300 | -1.01376700 | -1.61313700 |
| H | -3.99647300 | 0.07291900  | -3.01639900 | H | -3.90281300 | -0.02739200 | -3.05394500 |
| C | -3.80816200 | 0.61545500  | 2.35822100  | C | -3.78907600 | 0.63960500  | 2.36940300  |
| H | -4.40448100 | 1.26923400  | 1.72125900  | H | -4.34647800 | 1.34242300  | 1.74785400  |
| H | -4.49794700 | 0.13407400  | 3.05717000  | H | -4.50463500 | 0.17010600  | 3.05213400  |
| H | -3.13557100 | 1.22836500  | 2.95697100  | H | -3.08275200 | 1.19779100  | 2.98388400  |

|                 |             |             |             |                   |             |             |             |
|-----------------|-------------|-------------|-------------|-------------------|-------------|-------------|-------------|
| C               | -4.16545900 | -1.44807200 | 1.05531900  | C                 | -4.25774800 | -1.35345500 | 1.00355800  |
| H               | -3.76792900 | -2.32333600 | 0.54580100  | H                 | -3.91203600 | -2.22216200 | 0.44612300  |
| H               | -4.73286500 | -1.81538300 | 1.91549700  | H                 | -4.82984000 | -1.73124300 | 1.85778600  |
| H               | -4.87629900 | -0.94821300 | 0.39747500  | H                 | -4.94802600 | -0.78671800 | 0.37824900  |
| C               | -2.18080800 | -1.25437700 | 2.55607900  | C                 | -2.26493700 | -1.31874200 | 2.50673500  |
| H               | -1.44132500 | -0.60134800 | 3.02464100  | H                 | -1.46635500 | -0.72740400 | 2.96046200  |
| H               | -2.79207600 | -1.67432700 | 3.36038300  | H                 | -2.89550700 | -1.69677000 | 3.31870600  |
| H               | -1.65379800 | -2.07683900 | 2.07014200  | H                 | -1.81675400 | -2.17560600 | 2.00181900  |
| C               | 2.82579600  | -2.63042600 | 1.14012600  | C                 | 2.79942100  | -2.62654500 | 1.14253700  |
| H               | 1.83776100  | -3.06170600 | 0.96671700  | H                 | 1.81860200  | -3.04690000 | 0.91007100  |
| H               | 3.41230600  | -2.72183800 | 0.22717800  | H                 | 3.42888700  | -2.70838800 | 0.25758500  |
| H               | 3.31599300  | -3.24223900 | 1.90296700  | H                 | 3.24765700  | -3.24855400 | 1.92456200  |
| C               | 4.11202900  | -0.70855900 | 2.09034900  | C                 | 4.05159700  | -0.71398800 | 2.15498300  |
| H               | 4.85209800  | -0.79355400 | 1.29453000  | H                 | 4.81466100  | -0.79377200 | 1.37988800  |
| H               | 4.10822500  | 0.32120000  | 2.45243200  | H                 | 4.03289500  | 0.31496500  | 2.51929100  |
| H               | 4.45660800  | -1.33572300 | 2.91823900  | H                 | 4.36689500  | -1.34858100 | 2.99066800  |
| C               | 1.80090100  | -1.21234800 | 2.88242800  | C                 | 1.71940900  | -1.23504900 | 2.86856600  |
| H               | 1.81610700  | -0.27642600 | 3.44256300  | H                 | 1.70452500  | -0.30257000 | 3.43511600  |
| H               | 0.76927500  | -1.44556800 | 2.60923900  | H                 | 0.69976800  | -1.47465900 | 2.55854100  |
| H               | 2.14241000  | -1.99675700 | 3.56366200  | H                 | 2.05022700  | -2.02402700 | 3.55160900  |
| <b>TS-1C_1D</b> |             |             |             | <b>S-TS-1C_1D</b> |             |             |             |
| Pd              | 0.09328900  | -1.34104400 | -0.24516700 | Pd                | 0.11602600  | -1.34249000 | -0.25955100 |
| P               | -1.90657800 | 0.02133800  | 0.31210000  | P                 | -1.90463400 | -0.01581100 | 0.31344500  |
| P               | 1.89023200  | 0.17522100  | 0.26885000  | P                 | 1.87533300  | 0.20613800  | 0.27042100  |
| C               | -1.57798700 | 1.68029100  | 1.12617200  | C                 | -1.59924700 | 1.64194300  | 1.13561300  |
| C               | 1.46089000  | 1.81115900  | 1.07401700  | C                 | 1.43569800  | 1.83199000  | 1.08137000  |
| C               | 0.58470000  | 2.84143200  | 0.41993700  | C                 | 0.54008600  | 2.84652900  | 0.43146400  |
| C               | 1.19912700  | 3.98167100  | -0.10754100 | C                 | 1.13396000  | 3.99779200  | -0.09956600 |
| C               | 0.46888800  | 5.03559900  | -0.62961900 | C                 | 0.38214000  | 5.04113300  | -0.61554900 |
| C               | -0.91722700 | 4.97844600  | -0.60333600 | C                 | -1.00439600 | 4.95877600  | -0.58496600 |
| C               | -1.53921600 | 3.86877600  | -0.05672000 | C                 | -1.60551800 | 3.83449500  | -0.04184000 |
| C               | -0.81578800 | 2.78229600  | 0.44516200  | C                 | -0.86024000 | 2.76014500  | 0.45773900  |
| H               | 2.28142600  | 4.05220500  | -0.08922200 | H                 | 2.21626300  | 4.07684100  | -0.09369900 |
| H               | 0.97833200  | 5.90462700  | -1.02893400 | H                 | 0.87557700  | 5.91875600  | -1.01943000 |
| H               | -1.51075900 | 5.80237300  | -0.98163800 | H                 | -1.61523200 | 5.77171000  | -0.96302000 |
| H               | -2.62211700 | 3.85086000  | 0.00114500  | H                 | -2.68763300 | 3.78701200  | 0.01261600  |
| H               | 2.41760600  | 2.27973400  | 1.30292700  | H                 | 2.38727400  | 2.31585100  | 1.29879500  |
| H               | 1.03553900  | 1.51321400  | 2.03702000  | H                 | 1.01630500  | 1.52700200  | 2.04449900  |
| H               | -1.08045400 | 1.40709800  | 2.06130000  | H                 | -1.08485300 | 1.36859900  | 2.06121400  |
| H               | -2.55355300 | 2.07191700  | 1.41152100  | H                 | -2.57905400 | 2.01607800  | 1.42995500  |
| C               | 3.01092300  | -0.55221700 | 1.65689500  | C                 | 3.02167700  | -0.51263900 | 1.64174700  |
| C               | 2.86312900  | 0.57794600  | -1.32517000 | C                 | 2.83090700  | 0.62592500  | -1.32884900 |
| C               | -2.85727500 | -0.82672800 | 1.76916800  | C                 | -2.80096300 | -0.89789200 | 1.78041900  |
| C               | -3.04542200 | 0.38285800  | -1.17982900 | C                 | -3.08930300 | 0.33314100  | -1.14547900 |
| C               | -2.21407300 | 1.18261400  | -2.19200600 | C                 | -2.30225000 | 1.15474500  | -2.17355600 |
| H               | -2.82305600 | 1.35116600  | -3.08532700 | H                 | -2.93531300 | 1.30394600  | -3.05485900 |
| H               | -1.89521800 | 2.15327500  | -1.81972200 | H                 | -2.01058000 | 2.13673200  | -1.80635000 |
| H               | -1.32748100 | 0.62574800  | -2.50283600 | H                 | -1.40254400 | 0.62699500  | -2.49999200 |
| C               | -4.30241700 | 1.16482200  | -0.79403700 | C                 | -4.34909300 | 1.08631400  | -0.71884500 |
| H               | -4.97459700 | 0.58127900  | -0.16366800 | H                 | -4.98236500 | 0.48294100  | -0.06635800 |
| H               | -4.08185300 | 2.10397300  | -0.28509500 | H                 | -4.13353000 | 2.02963900  | -0.21499400 |
| H               | -4.85317400 | 1.41721500  | -1.70513700 | H                 | -4.93344300 | 1.32327300  | -1.61491200 |
| C               | -3.45460900 | -0.91667600 | -1.88135900 | C                 | -3.49612700 | -0.96537400 | -1.84754300 |
| H               | -4.04844500 | -0.65548500 | -2.76234100 | H                 | -4.11905600 | -0.70057500 | -2.70881900 |

|                                            |                                            |
|--------------------------------------------|--------------------------------------------|
| H -2.58595600 -1.47092900 -2.23755000      | H -2.62984700 -1.50363400 -2.23226900      |
| H -4.06486800 -1.57474800 -1.26670400      | H -4.07823100 -1.63771500 -1.22053800      |
| C -3.78023600 -1.95156200 1.29094800       | C -3.72298100 -2.02541100 1.31309500       |
| H -4.64450800 -1.57411900 0.74467500       | H -4.61272500 -1.64809700 0.80801400       |
| H -3.27355900 -2.69446500 0.67526000       | H -3.22624900 -2.74283200 0.66014500       |
| H -4.16218200 -2.47709900 2.17131000       | H -4.05921200 -2.57418700 2.19952900       |
| C -3.70072800 0.14960800 2.59880500        | C -3.62674100 0.05106400 2.65502900        |
| H -4.43516700 0.68971100 2.00057600        | H -4.39138900 0.58842800 2.09192400        |
| H -4.25503900 -0.42699100 3.34524800       | H -4.14079800 -0.55105300 3.41196100       |
| H -3.09700700 0.87405200 3.14518600        | H -3.01141200 0.77682400 3.18743600        |
| C -1.77866500 -1.43368500 2.67353500       | C -1.68382300 -1.50425200 2.63548800       |
| H -2.25616900 -1.90420700 3.53835200       | H -2.12686800 -1.98330200 3.51557700       |
| H -1.19648500 -2.19888900 2.15457400       | H -1.12163900 -2.26252000 2.08388500       |
| H -1.08614100 -0.68136400 3.05716600       | H -0.98113000 -0.74712700 2.99001900       |
| C 3.95936100 -1.62558500 1.11753500        | C 4.01923100 -1.52757300 1.08358800        |
| H 3.45354700 -2.40021000 0.54395400        | H 3.54666000 -2.31653900 0.50046900        |
| H 4.75472500 -1.19979100 0.50499400        | H 4.78914500 -1.05266100 0.47421100        |
| H 4.43966300 -2.11658500 1.96882500        | H 4.52214900 -2.00566100 1.93062600        |
| C 2.07180300 -1.19734600 2.68337800        | C 2.10525700 -1.22677100 2.64140900        |
| H 1.49958900 -2.02236800 2.25564300        | H 1.60205200 -2.08451400 2.18964900        |
| H 2.66996200 -1.59747200 3.50730600        | H 2.71440700 -1.59506900 3.47400700        |
| H 1.37017300 -0.48115100 3.11751000        | H 1.34704400 -0.56162400 3.06118000        |
| C 3.85430500 0.50937500 2.37777500         | C 3.81492400 0.56336400 2.39357000         |
| H 4.52008200 -0.00670900 3.07545700        | H 4.49669700 0.05389700 3.08258100         |
| H 4.48464600 1.08804900 1.70223400         | H 4.42259300 1.18356000 1.73306900         |
| H 3.25151500 1.19874100 2.96928400         | H 3.17809600 1.21258200 2.99523400         |
| C 3.30450600 -0.70342900 -2.04017500       | C 3.27475000 -0.64724600 -2.05521200       |
| H 3.84379600 -0.41559500 -2.94737000       | H 3.79909200 -0.34670900 -2.96854000       |
| H 3.96911300 -1.33060100 -1.45137000       | H 3.95416500 -1.26902200 -1.47653000       |
| H 2.44867600 -1.30200400 -2.35518600       | H 2.41843900 -1.25309700 -2.35870400       |
| C 1.89471300 1.29959700 -2.27112700        | C 1.85095200 1.34192200 -2.26565500        |
| H 2.40602000 1.47264500 -3.22269100        | H 2.34559900 1.49206000 -3.23111400        |
| H 1.01665200 0.68371500 -2.47834800        | H 0.95650200 0.73896800 -2.44209400        |
| H 1.55742100 2.26190800 -1.89333100        | H 1.54107400 2.31707800 -1.89582300        |
| C 4.08767300 1.45353100 -1.04897800        | C 4.04565700 1.51369500 -1.05625000        |
| H 4.85473900 0.92171100 -0.48459500        | H 4.81849500 0.98612200 -0.49456500        |
| H 4.53473700 1.74483900 -2.00396800        | H 4.48311500 1.81441700 -2.01444500        |
| H 3.84310600 2.37425500 -0.51718900        | H 3.78664300 2.42599400 -0.51553700        |
| C -0.93770200 -3.32533500 -0.93557900      | C -0.88587300 -3.29055600 -1.01493400      |
| C -0.91492800 -3.72341400 -2.39511500      | C -0.80426100 -3.57353000 -2.49779900      |
| H -0.79030300 -4.15713300 -0.24944500      | H -0.72002500 -4.16619500 -0.38937100      |
| H -0.97303500 -2.86149500 -3.06229100      | H -0.86328200 -2.66058300 -3.09451500      |
| H -0.02392800 -4.29384000 -2.66029000      | H 0.11507500 -4.09401900 -2.77566400       |
| C 1.08153400 -2.89034400 -0.66765800       | C 1.14804700 -2.86189000 -0.64086100       |
| O 1.81882400 -3.74692700 -0.85376300       | O 1.88302300 -3.73051200 -0.79444100       |
| H -1.78150000 -4.35766600 -2.60984000      | H -1.64354700 -4.21325100 -2.79666900      |
| H -1.86288900 -2.83057200 -0.66434500      | H -1.83918700 -2.86063700 -0.73266600      |
| <b>1D</b>                                  | <b>S-1D</b>                                |
| Pd 0.3063838394 -1.1544992646 0.2573880986 | Pd 0.2725926267 -1.168096816 -0.2855131138 |
| P -1.8952297739 -0.228348852 0.2708883732  | P -1.9061162883 -0.2089437782 0.2791815634 |
| P 1.7899384363 0.5330813166 0.2967264542   | P 1.7734041766 0.4994832527 0.2736468633   |
| C -2.0617733356 1.4336791426 1.1089474332  | C -2.0839695747 1.4559924277 1.0994465823  |
| C 0.9654216233 1.9581230094 1.2098485243   | C 0.9535332695 1.9307683784 1.179502679    |

|   |               |               |               |   |               |               |               |
|---|---------------|---------------|---------------|---|---------------|---------------|---------------|
| C | -0.0267540927 | 2.9023588075  | 0.5827980606  | C | -0.02746758   | 2.8898802117  | 0.5586327763  |
| C | 0.4463395926  | 4.1507039625  | 0.1640479592  | C | 0.4620196291  | 4.1327794195  | 0.1370732551  |
| C | -0.3942069551 | 5.1324490515  | -0.3315980603 | C | -0.3678236103 | 5.1293094575  | -0.3503819733 |
| C | -1.7585000284 | 4.8886309703  | -0.3910426575 | C | -1.7377399533 | 4.9069086165  | -0.4019070973 |
| C | -2.2472673048 | 3.6716041123  | 0.0524580883  | C | -2.2427343831 | 3.6956166618  | 0.0428388823  |
| C | -1.409184299  | 2.6620500225  | 0.5356750808  | C | -1.4157690605 | 2.673382713   | 0.5233892623  |
| H | 1.5059645998  | 4.3652381213  | 0.2473199313  | H | 1.5267953728  | 4.3250285508  | 0.2071138417  |
| H | 0.0110793262  | 6.0873512507  | -0.6448517324 | H | 0.0518038657  | 6.0776300686  | -0.6688987278 |
| H | -2.4403431216 | 5.6482166355  | -0.7549018474 | H | -2.410860171  | 5.6760576343  | -0.7654962041 |
| H | -3.3192348947 | 3.5030368077  | 0.0479738218  | H | -3.3162433187 | 3.5362972702  | 0.0389771907  |
| H | 1.7892296891  | 2.559553259   | 1.5939958074  | H | 1.7858751229  | 2.5249691567  | 1.5552408213  |
| H | 0.5210848078  | 1.462090447   | 2.0772593129  | H | 0.502268273   | 1.4385599633  | 2.0454074685  |
| H | -1.6804733875 | 1.2538772335  | 2.1189640823  | H | -1.712428366  | 1.2874807723  | 2.1147755636  |
| H | -3.1291225093 | 1.6293411422  | 1.2239776974  | H | -3.1525869381 | 1.6561580756  | 1.1911215154  |
| C | 3.0420593434  | -0.0141163005 | 1.6546815474  | C | 3.0125872985  | -0.0485653394 | 1.6442650531  |
| C | 2.6466846861  | 1.2382638655  | -1.2558832421 | C | 2.6510284456  | 1.2041609014  | -1.2663156681 |
| C | -2.6566249215 | -1.3626947897 | 1.6184270308  | C | -2.6514288108 | -1.3382244177 | 1.6378441259  |
| C | -2.9720875257 | -0.1822168298 | -1.3047843948 | C | -2.9997999009 | -0.1803391589 | -1.2846930782 |
| C | 2.5937058754  | -3.4815172011 | -1.1222467409 | C | 2.6173688121  | -3.4137309211 | -1.1061121011 |
| C | 2.4689640383  | -4.7929296815 | -1.8878875262 | C | 2.571445942   | -4.7173059168 | -1.8899680831 |
| H | 3.2700038772  | -2.7769810465 | -1.6106933968 | H | 3.2988170272  | -2.6881721998 | -1.5521354778 |
| H | 3.4542583026  | -5.2476007083 | -1.9993118891 | H | 3.5784685739  | -5.1336407662 | -1.963090371  |
| H | 1.8228341771  | -5.4979929196 | -1.3646113636 | H | 1.9326930535  | -5.455592312  | -1.4016768358 |
| C | 1.298284692   | -2.7810807228 | -0.8772972259 | C | 1.292789565   | -2.7590551551 | -0.9185199591 |
| O | 0.2010489056  | -3.2690281415 | -1.0202917748 | O | 0.2255808726  | -3.3015367547 | -1.1267317965 |
| H | 2.0554075092  | -4.6308543132 | -2.8841321698 | H | 2.1971802931  | -4.5567549316 | -2.9034140681 |
| H | 3.0184450024  | -3.6432429938 | -0.123014127  | H | 2.990693587   | -3.5783661975 | -0.087387511  |
| C | 1.5434265758  | 1.7776289594  | -2.1751950922 | C | 1.5693299913  | 1.7722788664  | -2.1916679695 |
| H | 2.0102239957  | 2.1515579976  | -3.0914562222 | H | 2.0545056012  | 2.1227911004  | -3.108896111  |
| H | 0.8522106163  | 0.9817138944  | -2.4611584835 | H | 0.8476219102  | 1.0016609414  | -2.4739921712 |
| H | 0.9730911597  | 2.5925279936  | -1.7357492954 | H | 1.0305785205  | 2.6130517811  | -1.7602008806 |
| C | 3.6486553475  | 2.3440133305  | -0.9161292959 | C | 3.664944833   | 2.2887952115  | -0.8997171855 |
| H | 4.5128869079  | 1.9643459861  | -0.369854453  | H | 4.5220024511  | 1.8803322279  | -0.3624216674 |
| H | 4.0215124924  | 2.7792349367  | -1.8480405706 | H | 4.0412220533  | 2.7420653569  | -1.8231539461 |
| H | 3.2038750441  | 3.1547157493  | -0.3389601063 | H | 3.2301699129  | 3.0867219427  | -0.297106119  |
| C | 3.3566096081  | 0.1262591745  | -2.0332987774 | C | 3.3500012476  | 0.0910693816  | -2.0492538159 |
| H | 4.1958888138  | -0.3109532354 | -1.4970667219 | H | 4.1500237641  | -0.3935860107 | -1.4938576003 |
| H | 2.657338601   | -0.664896714  | -2.3078591218 | H | 2.6370317077  | -0.6669984131 | -2.3780541713 |
| H | 3.7475008043  | 0.5545018406  | -2.9607240657 | H | 3.7932422571  | 0.5369838711  | -2.9459583941 |
| C | -2.4735675709 | 0.9819809861  | -2.1689834335 | C | -2.5295382182 | 0.9903075658  | -2.1546183208 |
| H | -2.9521375578 | 0.9149258527  | -3.1505402741 | H | -3.0079542594 | 0.906132053   | -3.1363075681 |
| H | -2.7175065915 | 1.95510241    | -1.7481546478 | H | -2.804448925  | 1.9572946279  | -1.7362469321 |
| H | -1.393987465  | 0.9416568973  | -2.3251715317 | H | -1.4485447102 | 0.9786127725  | -2.312983137  |
| C | -4.4641408196 | -0.0010197618 | -1.0258630735 | C | -4.4910187726 | -0.0216147483 | -0.9952931719 |
| H | -4.9026715552 | -0.8695199209 | -0.534155786  | H | -4.9095586373 | -0.8962585263 | -0.4957888086 |
| H | -4.674920301  | 0.883433458   | -0.4207010329 | H | -4.7046127125 | 0.8610283643  | -0.3879823486 |
| H | -4.9876099326 | 0.1295375319  | -1.9779578702 | H | -5.0247889938 | 0.0987977248  | -1.944836258  |
| C | -2.7403640093 | -1.4736529443 | -2.0985361741 | C | -2.7506453486 | -1.4676798361 | -2.0777670088 |
| H | -1.6880836664 | -1.5989261725 | -2.3639410473 | H | -1.6933875359 | -1.5802585934 | -2.3330441172 |
| H | -3.0639934904 | -2.3698280544 | -1.5734341275 | H | -3.0718130885 | -2.3651927109 | -1.5511260977 |
| H | -3.3089287169 | -1.4151157257 | -3.0314615556 | H | -3.3146708373 | -1.4147626877 | -3.0152766045 |
| C | -3.0070423053 | -2.7318977283 | 1.030008899   | C | -3.0065708162 | -2.7089795539 | 1.0600324336  |
| H | -3.2578064552 | -3.4117731466 | 1.8496904624  | H | -3.2429497341 | -3.3864862244 | 1.8877311855  |
| H | -3.8750378704 | -2.6899688732 | 0.3718274408  | H | -3.8813885302 | -2.6717993627 | 0.4097184497  |
| H | -2.1736672825 | -3.1748543894 | 0.4801663436  | H | -2.1755349255 | -3.1493923698 | 0.5034793946  |



|                                            |                                            |
|--------------------------------------------|--------------------------------------------|
| C -1.5624395128 -1.5656310279 2.674933266  | C -1.5411064147 -1.5352798736 2.6773495346 |
| H -0.6826847373 -2.0570507233 2.2539592033 | H -0.6784812286 -2.047521307 2.2448690267  |
| H -1.2441212803 -0.6290492082 3.139237795  | H -1.1995424681 -0.593151419 3.1128737649  |
| H -1.9524387967 -2.202207963 3.4747318535  | H -1.9272460845 -2.1521614317 3.4960504792 |
| C -3.8913823552 -0.7693672368 2.3051728435 | C -3.8770304624 -0.744942361 2.3372469012  |
| H -4.7032504251 -0.5532245322 1.6121655581 | H -4.7008945524 -0.5408241465 1.6536283133 |
| H -4.2685621827 -1.4979874539 3.0292448987 | H -4.2363387395 -1.4692300524 3.076690489  |
| H -3.6624492131 0.1401649246 2.8622585731  | H -3.6411202947 0.1733077542 2.8778143691  |
| C 4.1872620132 -0.8278084241 1.0507990476  | C 4.1951772284 -0.8162787034 1.0554836976  |
| H 4.8882809226 -0.2055038094 0.4939331619  | H 4.8753331612 -0.1655554537 0.5046180744  |
| H 4.7485455775 -1.2959356714 1.8646188595  | H 4.760840203 -1.2559624371 1.8835157896   |
| H 3.8313236875 -1.6224448347 0.3970341793  | H 3.8860065734 -1.6309760577 0.403424484   |
| C 2.266438008 -0.908864083 2.6283296404    | C 2.2353928753 -0.9808401103 2.5782944846  |
| H 1.8805926758 -1.8039963974 2.1368380843  | H 1.8819082805 -1.8725756433 2.0557186487  |
| H 2.9384571786 -1.2265131127 3.4313112248  | H 2.8993841386 -1.3031017349 3.3877546046  |
| H 1.4280052009 -0.3900057659 3.096971806   | H 1.3768975231 -0.484619878 3.0359566654   |
| C 3.6453336114 1.1555446063 2.4444106019   | C 3.5666716804 1.1184954703 2.4707989306   |
| H 4.1133977367 1.9072967916 1.8083947381   | H 4.0338388079 1.8913531925 1.8591520789   |
| H 2.9171946439 1.6484151916 3.0892678635   | H 2.8086854886 1.5828629114 3.1029016294   |
| H 4.4257239364 0.756340315 3.0987950481    | H 4.3377154692 0.719395016 3.137993188     |
| <b>1D-CO</b>                               | <b>S-1D-CO</b>                             |
| Pd -0.29623000 -1.15572800 -0.21610100     | Pd -0.31551000 -1.14762900 -0.21642600     |
| P 2.09141700 -0.32032100 0.26352100        | P 2.06756400 -0.35555400 0.28695500        |
| P -1.62407200 0.74565600 0.61205500        | P -1.63910900 0.77773800 0.55013000        |
| C 2.34247500 1.46513200 0.77967000         | C 2.35275100 1.41952200 0.80976400         |
| C -0.56212000 2.20003900 1.15545700        | C -0.55381800 2.22153800 1.07070000        |
| C 0.33677900 2.93554200 0.19361800         | C 0.40108800 2.92568000 0.14612100         |
| C -0.13167800 4.09681000 -0.42680100       | C -0.02619200 4.09788700 -0.48796200       |
| C 0.67434500 4.88450300 -1.23171800        | C 0.82565500 4.87657700 -1.25526700        |
| C 2.00561300 4.53968000 -1.40269700        | C 2.16017400 4.51211300 -1.36877800        |
| C 2.49836000 3.41507100 -0.76271600        | C 2.60982200 3.37672000 -0.71344700        |
| C 1.68902400 2.58857900 0.02173100         | C 1.75409000 2.55848300 0.03244700         |
| H -1.15194500 4.41503400 -0.25699100       | H -1.05248200 4.42022900 -0.35736200       |
| H 0.27031600 5.77692400 -1.69494800        | H 0.45381800 5.77546700 -1.73538100        |
| H 2.66499100 5.15729300 -2.00103400        | H 2.85444500 5.12087400 -1.93822800        |
| H 3.55613600 3.19419500 -0.84319100        | H 3.66601200 3.13593100 -0.75014200        |
| H -1.24390000 2.91320900 1.62348300        | H -1.23876200 2.96619900 1.47570200        |
| H 0.03956800 1.78194300 1.96070100         | H -0.00611000 1.81340500 1.92196400        |
| H 2.00930900 1.48885900 1.81822200         | H 1.97812700 1.45190600 1.83400200         |
| H 3.42114200 1.63570900 0.80531500         | H 3.43388300 1.56125700 0.87004500         |
| C -2.32971600 0.16980300 2.30954600        | C -2.38486000 0.35404900 2.28226900        |
| C -2.98659900 1.51614600 -0.49681900       | C -2.93878700 1.53094100 -0.64732700       |
| C 3.11827400 -1.21381500 1.62921400        | C 3.03864600 -1.27448600 1.67229100        |
| C 2.92620900 -0.48298200 -1.45605300       | C 2.94183600 -0.54145500 -1.41177900       |
| C -1.85191500 -1.85745600 -1.45840400      | C -1.88206300 -1.89952700 -1.36297500      |
| C -2.87985700 -2.88309100 -1.04826500      | C -2.92458100 -2.83609600 -0.81686600      |
| H -3.41314300 -2.48909800 -0.18159000      | H -3.56345700 -2.23600200 -0.16298500      |
| H -2.31938100 -3.74146600 -0.66264700      | H -2.41833700 -3.54000700 -0.14999200      |
| O -1.70204800 -1.44406300 -2.56355600      | O -1.77611900 -1.61907200 -2.52671300      |
| C -3.82363500 -3.29282200 -2.16962400      | C -3.74396800 -3.55062800 -1.87978400      |
| H -4.40738700 -2.44512100 -2.53087300      | H -4.29656000 -2.84507100 -2.50352900      |
| H -3.27572700 -3.70354100 -3.01808900      | H -3.10891300 -4.15503300 -2.53150000      |
| H -4.51692700 -4.05355000 -1.80721900      | H -4.46636900 -4.21469300 -1.39963000      |
| C 4.22468200 0.31463000 -1.59566300        | C 4.25267000 0.23870300 -1.52065600        |

|                            |             |             |                              |             |             |
|----------------------------|-------------|-------------|------------------------------|-------------|-------------|
| H 4.62542700               | 0.14404900  | -2.59949800 | H 4.68070600                 | 0.04800300  | -2.51094900 |
| H 4.05998400               | 1.38505400  | -1.50124200 | H 4.10271300                 | 1.31281800  | -1.44018700 |
| H 4.99249600               | 0.01497300  | -0.88585500 | H 4.99149400                 | -0.06483000 | -0.78118200 |
| C 1.90789600               | 0.05154600  | -2.47364200 | C 1.95852000                 | -0.00441100 | -2.46005100 |
| H 2.34863100               | 0.00163500  | -3.47413200 | H 2.43327000                 | -0.05301000 | -3.44617500 |
| H 0.99315800               | -0.54711000 | -2.49157000 | H 1.04555800                 | -0.60531700 | -2.50062700 |
| H 1.63783800               | 1.09123200  | -2.28395200 | H 1.67998700                 | 1.03502900  | -2.27671000 |
| C 3.21353300               | -1.95129400 | -1.78103200 | C 3.22477800                 | -2.01119600 | -1.72974800 |
| H 3.98881000               | -2.38332900 | -1.14772600 | H 3.97949800                 | -2.44711300 | -1.07450000 |
| H 2.32277500               | -2.57680400 | -1.71754300 | H 2.32865400                 | -2.63110100 | -1.69108000 |
| H 3.56947100               | -2.01273400 | -2.81358300 | H 3.60832300                 | -2.06893800 | -2.75407600 |
| C 4.63155400               | -1.05084700 | 1.46174700  | C 4.55717300                 | -1.12084600 | 1.56402300  |
| H 5.12487300               | -1.50154000 | 2.32853300  | H 5.00901300                 | -1.57479100 | 2.45308000  |
| H 5.01397400               | -1.55808200 | 0.57671900  | H 4.96993900                 | -1.63291800 | 0.69471700  |
| H 4.94291200               | -0.00511800 | 1.42777800  | H 4.87366700                 | -0.07611200 | 1.53920900  |
| C 2.72996200               | -0.63865200 | 2.99856400  | C 2.59549100                 | -0.70848700 | 3.02646400  |
| H 1.65044900               | -0.60908000 | 3.15311400  | H 1.50954400                 | -0.67960800 | 3.12513300  |
| H 3.14824000               | -1.28605900 | 3.77449600  | H 2.97970500                 | -1.36511600 | 3.81373800  |
| H 3.13599000               | 0.35952600  | 3.16662400  | H 2.99228800                 | 0.28986700  | 3.21618000  |
| C 2.76655700               | -2.70253100 | 1.63558200  | C 2.67561200                 | -2.75967000 | 1.65311200  |
| H 3.37167100               | -3.20670500 | 2.39469300  | H 3.25731900                 | -3.27028500 | 2.42778900  |
| H 1.71961400               | -2.86187700 | 1.90005700  | H 1.61991300                 | -2.91346500 | 1.88618100  |
| H 2.96874300               | -3.19394800 | 0.68439600  | H 2.90203100                 | -3.24287700 | 0.70285500  |
| C -3.06491000              | -1.16239700 | 2.14210500  | C -3.67030000                | -0.46380000 | 2.17168000  |
| H -3.42700900              | -1.48997200 | 3.12108300  | H -3.93330900                | -0.81602100 | 3.17458300  |
| H -3.93149100              | -1.08906700 | 1.48639400  | H -4.50976300                | 0.12752500  | 1.80735300  |
| H -2.39599100              | -1.93566700 | 1.75927700  | H -3.55244400                | -1.34406900 | 1.54052200  |
| C -3.26523500              | 1.18557100  | 2.96741400  | C -2.67613300                | 1.59520300  | 3.13312500  |
| H -2.82317800              | 2.17947000  | 3.05521600  | H -1.77180800                | 2.13755500  | 3.41076500  |
| H -4.21617700              | 1.27204000  | 2.44234300  | H -3.36466400                | 2.28950900  | 2.65109900  |
| H -3.49021900              | 0.84367500  | 3.98234700  | H -3.14783600                | 1.25888500  | 4.06256200  |
| C -1.13942300              | -0.09014100 | 3.24075900  | C -1.33858900                | -0.49443000 | 3.00976500  |
| H -0.39051900              | -0.72297800 | 2.75824500  | H -1.08570000                | -1.40004900 | 2.45117100  |
| H -0.66191200              | 0.82630100  | 3.58949500  | H -0.42296700                | 0.06570100  | 3.20318600  |
| H -1.49794800              | -0.62007700 | 4.12742100  | H -1.74517200                | -0.79550600 | 3.98113900  |
| C -4.16256100              | 0.55463500  | -0.67823000 | C -4.07379400                | 0.56600500  | -1.00252200 |
| H -4.84405600              | 0.98318600  | -1.41883300 | H -4.74559300                | 1.09616300  | -1.68611500 |
| H -3.86083200              | -0.41982500 | -1.05483400 | H -3.72929700                | -0.31781800 | -1.53306200 |
| H -4.73353900              | 0.41673700  | 0.24048000  | H -4.66524800                | 0.25666100  | -0.14423400 |
| C -2.33453700              | 1.77252400  | -1.86400000 | C -2.18487200                | 1.84101300  | -1.94729700 |
| H -3.08742700              | 2.20370900  | -2.53081500 | H -2.90500100                | 2.21137300  | -2.68457400 |
| H -1.50856900              | 2.47971700  | -1.80231400 | H -1.41773300                | 2.60270900  | -1.82342700 |
| H -1.96970700              | 0.85713300  | -2.32770900 | H -1.71565700                | 0.94619300  | -2.36105600 |
| C -3.55396000              | 2.83105900  | 0.05050900  | C -3.58069100                | 2.80033400  | -0.08284300 |
| H -4.22498200              | 3.24810000  | -0.70627300 | H -4.17231400                | 3.26616600  | -0.87821700 |
| H -4.13860600              | 2.69377500  | 0.95793300  | H -4.26315600                | 2.57558400  | 0.73869200  |
| H -2.79617300              | 3.58451900  | 0.24935200  | H -2.86098000                | 3.54152600  | 0.26064800  |
| C 0.24387800               | -3.03057500 | -0.33944200 | C 0.24595400                 | -3.01158000 | -0.39285400 |
| O 0.45562900               | -4.14341100 | -0.34008000 | O 0.42645100                 | -4.12937300 | -0.43299900 |
| <b>1D-CH<sub>3</sub>OH</b> |             |             | <b>S-1D-CH<sub>3</sub>OH</b> |             |             |
| Pd 0.29655600              | -1.05160900 | -0.16765400 | Pd 0.26713000                | -1.05014900 | -0.19432600 |
| P 1.69768500               | 0.71599400  | 0.49747600  | P 1.73635000                 | 0.64354000  | 0.49901400  |
| P -2.09235800              | -0.21617300 | 0.21227800  | P -2.06886400                | -0.11631000 | 0.24282300  |
| C 2.89174200               | 1.47386600  | -0.79121500 | C 3.02407300                 | 1.32453100  | -0.74925300 |

|   |             |             |             |   |             |             |             |
|---|-------------|-------------|-------------|---|-------------|-------------|-------------|
| C | 2.61021000  | 0.23103500  | 2.13319200  | C | 2.56522500  | 0.10002100  | 2.15846500  |
| C | -3.10999600 | -1.10309000 | 1.58928700  | C | -3.12869300 | -0.94676200 | 1.62316900  |
| C | -2.97063800 | -0.30593200 | -1.48441800 | C | -2.95851000 | -0.18570600 | -1.44721000 |
| C | 3.91192600  | 0.45482200  | -1.30661200 | C | 4.01603100  | 0.26368800  | -1.23241600 |
| C | 2.03101600  | 1.90360400  | -1.98634000 | C | 2.23394200  | 1.79115400  | -1.97692500 |
| C | 3.66082700  | 2.66821500  | -0.21883500 | C | 3.82980500  | 2.47983300  | -0.14941600 |
| C | 1.68551500  | -0.74423500 | 2.87023900  | C | 1.55877600  | -0.80851100 | 2.86873300  |
| C | 2.88307900  | 1.42788400  | 3.05506800  | C | 2.89368200  | 1.27241200  | 3.09117100  |
| C | 3.94371300  | -0.47310700 | 1.86404300  | C | 3.85380600  | -0.68848300 | 1.91822700  |
| C | -3.56223100 | -2.49669300 | 1.14974500  | C | -3.68819800 | -2.29860200 | 1.17954400  |
| C | -4.34322600 | -0.32563200 | 2.06465600  | C | -4.29654600 | -0.08737000 | 2.11859300  |
| C | -2.14562900 | -1.26439500 | 2.77074600  | C | -2.16793500 | -1.18242500 | 2.79244600  |
| C | -2.80597700 | -1.71503800 | -2.06720100 | C | -2.85477700 | -1.60699300 | -2.00918500 |
| C | -4.45174300 | 0.06550300  | -1.44672400 | C | -4.42084100 | 0.25082500  | -1.40333300 |
| C | -2.21896100 | 0.65006400  | -2.42063600 | C | -2.18015700 | 0.72907900  | -2.40096300 |
| C | 0.65436500  | 2.14480500  | 1.15847600  | C | 0.78269600  | 2.13886600  | 1.12981700  |
| C | -2.32081300 | 1.54566900  | 0.80879500  | C | -2.21660400 | 1.65838200  | 0.82186300  |
| C | -1.62867400 | 2.70292800  | 0.14678000  | C | -1.48475800 | 2.77425200  | 0.13375800  |
| C | -2.42692600 | 3.61796700  | -0.54784700 | C | -2.25314700 | 3.71045300  | -0.56931000 |
| C | -1.91507700 | 4.78872300  | -1.07944900 | C | -1.69658000 | 4.84469600  | -1.13707600 |
| C | -0.57323900 | 5.08594800  | -0.88985000 | C | -0.33622600 | 5.08007800  | -0.98354300 |
| C | 0.22437100  | 4.19807400  | -0.18897100 | C | 0.43359400  | 4.17113100  | -0.27585600 |
| C | -0.26478400 | 2.98727300  | 0.31409000  | C | -0.10489500 | 2.99990200  | 0.27190300  |
| H | 0.70903000  | -0.30732200 | 3.08775400  | H | 0.61915300  | -0.29447100 | 3.07692300  |
| H | 2.14349800  | -1.00803700 | 3.82858800  | H | 1.98446400  | -1.12004600 | 3.82896200  |
| H | 1.53819400  | -1.66506500 | 2.30307200  | H | 1.34037500  | -1.70659800 | 2.28626800  |
| H | 1.97405900  | 1.86219800  | 3.47186100  | H | 2.00241500  | 1.76996800  | 3.47528000  |
| H | 3.47681600  | 1.06693200  | 3.89986600  | H | 3.43172200  | 0.86643600  | 3.95444300  |
| H | 3.46024800  | 2.21876400  | 2.57472600  | H | 3.53997600  | 2.02032700  | 2.62965600  |
| H | 4.30495600  | -0.88117300 | 2.81298300  | H | 4.15712900  | -1.13386700 | 2.87198400  |
| H | 3.85197000  | -1.30415200 | 1.16788800  | H | 3.72722400  | -1.49851500 | 1.20116200  |
| H | 4.70771400  | 0.21867700  | 1.50782400  | H | 4.66935700  | -0.04295500 | 1.58984500  |
| H | 3.01791300  | 3.42684300  | 0.22527400  | H | 3.21182500  | 3.27589900  | 0.26423100  |
| H | 4.39095000  | 2.35885800  | 0.53036000  | H | 4.50758500  | 2.13153300  | 0.63201100  |
| H | 4.21555100  | 3.14973700  | -1.02975800 | H | 4.44412600  | 2.92120100  | -0.94172300 |
| H | 4.59153200  | 0.09318700  | -0.54038600 | H | 4.66327200  | -0.11708800 | -0.44682200 |
| H | 4.51419900  | 0.94628500  | -2.07654200 | H | 4.65566300  | 0.73629600  | -1.98542800 |
| H | 3.43611700  | -0.40227500 | -1.77648000 | H | 3.52643300  | -0.57681000 | -1.71815000 |
| H | 2.68996400  | 2.26779700  | -2.78008100 | H | 2.94353100  | 2.13985100  | -2.73460900 |
| H | 1.46120600  | 1.06207800  | -2.38722200 | H | 1.65805100  | 0.97177700  | -2.41402200 |
| H | 1.32918300  | 2.69818700  | -1.74487000 | H | 1.55170200  | 2.61004900  | -1.75928200 |
| H | -1.14280100 | 0.45624000  | -2.41286100 | H | -1.10612500 | 0.52220800  | -2.37544900 |
| H | -2.37138600 | 1.69618600  | -2.16592500 | H | -2.32689700 | 1.78473000  | -2.18033400 |
| H | -2.57937500 | 0.49855600  | -3.44279800 | H | -2.53121100 | 0.54981500  | -3.42303200 |
| H | -3.29941600 | -2.48721900 | -1.47631200 | H | -3.36286800 | -2.35258900 | -1.39871900 |
| H | -3.25384200 | -1.74094700 | -3.06491500 | H | -3.31457200 | -1.62524900 | -3.00313200 |
| H | -1.74806400 | -1.96512000 | -2.18924700 | H | -1.80990700 | -1.90482500 | -2.12997300 |
| H | -4.62101500 | 1.05155200  | -1.01136400 | H | -4.54181900 | 1.24958600  | -0.97914300 |
| H | -5.04861400 | -0.66086800 | -0.89375900 | H | -5.04159500 | -0.44375800 | -0.83548900 |
| H | -4.84228100 | 0.09489600  | -2.46884400 | H | -4.81363500 | 0.28045200  | -2.42619400 |
| H | -2.72817200 | -3.10362700 | 0.79648800  | H | -2.91726100 | -2.96453000 | 0.79311100  |
| H | -4.33187600 | -2.46523600 | 0.37793400  | H | -4.47340100 | -2.19886000 | 0.42886200  |
| H | -3.99294100 | -3.01544800 | 2.01130900  | H | -4.13285100 | -2.78912700 | 2.05227100  |
| H | -5.04366300 | -0.10328100 | 1.25976500  | H | -4.98842900 | 0.18923900  | 1.32231600  |
| H | -4.87700400 | -0.93805700 | 2.79796100  | H | -4.86085600 | -0.67184300 | 2.85373900  |

|                |             |             |                  |             |             |
|----------------|-------------|-------------|------------------|-------------|-------------|
| H -4.08590500  | 0.60855500  | 2.56430000  | H -3.96590100    | 0.82242100  | 2.62126600  |
| H -2.66839600  | -1.74749300 | 3.60189100  | H -2.71907900    | -1.63733600 | 3.62290600  |
| H -1.77679100  | -0.30483200 | 3.14132700  | H -1.73120900    | -0.25165600 | 3.16211200  |
| H -1.28339500  | -1.87961900 | 2.50764500  | H -1.35581100    | -1.85744500 | 2.51566500  |
| H -3.39224600  | 1.74832000  | 0.81199700  | H -3.27824100    | 1.90473600  | 0.82869800  |
| H -2.02547500  | 1.49864100  | 1.86168300  | H -1.90319800    | 1.61167600  | 1.86957000  |
| H 0.09515800   | 1.67132300  | 1.96954400  | H 0.20599300     | 1.71801600  | 1.95692100  |
| H 1.37089400   | 2.81309700  | 1.63573200  | H 1.53850400     | 2.78443100  | 1.57736400  |
| H -3.48772800  | 3.41372900  | -0.65067000 | H -3.32247100    | 3.54541200  | -0.65288500 |
| H -2.56452100  | 5.47636700  | -1.60832200 | H -2.32372000    | 5.54889000  | -1.67354600 |
| H -0.15468000  | 6.01351900  | -1.26236900 | H 0.12105300     | 5.97433700  | -1.39349700 |
| H 1.25923500   | 4.46363300  | -0.00870600 | H 1.48592400     | 4.38224700  | -0.12697100 |
| C 1.87222400   | -2.08844000 | -0.87219200 | C 1.74513200     | -2.11946200 | -1.00167800 |
| C 1.77473900   | -2.25132200 | -2.38458500 | C 1.51718100     | -2.22644300 | -2.49988600 |
| C 2.89937200   | -3.09158300 | -2.97732000 | C 2.16609400     | -3.44968800 | -3.13041900 |
| H 0.80283200   | -2.71917300 | -2.57091000 | H 0.43849900     | -2.20638000 | -2.68134100 |
| H 1.71919000   | -1.26024000 | -2.84027100 | H 1.90272500     | -1.30155200 | -2.94059800 |
| O 2.60915200   | -2.71319400 | -0.17325200 | O 2.53997500     | -2.79009000 | -0.39810400 |
| O -0.46104800  | -3.35001000 | -0.35168200 | O -0.47487400    | -3.35779300 | -0.29250300 |
| C -0.11191800  | -4.42646700 | 0.53204500  | C -0.24185300    | -4.27490500 | 0.77984900  |
| H -0.15227800  | -5.38042600 | 0.00224200  | H -0.38635000    | -5.30256100 | 0.43537600  |
| H 0.90837600   | -4.24650900 | 0.86077900  | H 0.79261700     | -4.15152400 | 1.09514100  |
| H -0.77541200  | -4.45594900 | 1.39978100  | H -0.90442300    | -4.07941100 | 1.62685800  |
| H -1.33812000  | -3.49850800 | -0.71752000 | H -1.35688400    | -3.50614800 | -0.65154700 |
| H 3.87436700   | -2.63471600 | -2.80063700 | H 3.24772700     | -3.44694100 | -2.97949500 |
| H 2.91732000   | -4.08952900 | -2.53918700 | H 1.76638700     | -4.37342700 | -2.70603900 |
| H 2.75900700   | -3.18968500 | -4.05516200 | H 1.97232400     | -3.45826200 | -4.20565900 |
| <b>TS-1D_P</b> |             |             | <b>S-TS-1D_P</b> |             |             |
| Pd -0.04451600 | -0.62703000 | 0.00948800  | Pd -0.04827100   | -0.63286100 | -0.02239100 |
| P 2.16996400   | 0.10776000  | 0.38581100  | P 2.17867300     | -0.01974300 | 0.37784500  |
| P -2.10464000  | 0.36581900  | 0.34110600  | P -2.03046700    | 0.49640200  | 0.36756400  |
| C 3.36260000   | 0.30930500  | -1.09017000 | C 3.38759900     | 0.07311700  | -1.10146400 |
| C 3.04177600   | -0.58167900 | 1.94988800  | C 3.00626100     | -0.76051300 | 1.94590400  |
| C -3.14129000  | -0.11144400 | 1.89086600  | C -3.06312700    | 0.05336100  | 1.93004100  |
| C -3.19841400  | 0.69241700  | -1.18834600 | C -3.14476600    | 0.90108100  | -1.13280900 |
| C 1.72406400   | 1.84244100  | 1.01474100  | C 1.88709500     | 1.74892400  | 0.99317100  |
| C -1.43427500  | 2.03986400  | 0.94659900  | C -1.26860900    | 2.12794900  | 0.97538300  |
| C -0.48386900  | 2.89865900  | 0.14721000  | C -0.27825400    | 2.92855900  | 0.16520400  |
| C -1.06350000  | 3.95838700  | -0.56410100 | C -0.80525500    | 4.02184300  | -0.54028500 |
| C -0.31887200  | 4.90331700  | -1.24535600 | C -0.01688300    | 4.91798500  | -1.24095700 |
| C 1.06548300   | 4.82860900  | -1.20006400 | C 1.36219900     | 4.75425000  | -1.22997300 |
| C 1.65892700   | 3.80903300  | -0.47894500 | C 1.90666500     | 3.69952300  | -0.51836700 |
| C 0.92454500   | 2.81969900  | 0.18889400  | C 1.12594500     | 2.76308300  | 0.17680300  |
| H -2.30961700  | 2.64994900  | 1.17700700  | H -2.10542600    | 2.78799400  | 1.21167900  |
| H -0.98604700  | 1.77670400  | 1.90757100  | H -0.82088500    | 1.83343000  | 1.92729200  |
| H 1.20404200   | 1.62569600  | 1.95098700  | H 1.37939900     | 1.58602800  | 1.94652100  |
| H 2.66088900   | 2.32851200  | 1.29252700  | H 2.86445600     | 2.17638700  | 1.22567200  |
| H -2.14378500  | 4.05613700  | -0.55819300 | H -1.87848000    | 4.17847100  | -0.51668300 |
| H -0.81443500  | 5.70652500  | -1.77799700 | H -0.47484000    | 5.74769500  | -1.76910700 |
| H 1.67799300   | 5.57212000  | -1.69652400 | H 2.00992500     | 5.45243600  | -1.74967500 |
| H 2.74090100   | 3.78537200  | -0.40752900 | H 2.98597600     | 3.59709400  | -0.47720900 |
| C 0.28521200   | -3.11139700 | -1.10463600 | C -0.07966300    | -3.12032700 | -1.10289300 |
| C -0.00275900  | -2.67166400 | -2.49636200 | C -0.26249500    | -2.59984900 | -2.48439600 |
| C -0.43922000  | -3.87023700 | -3.35251100 | C -0.82343200    | -3.70634800 | -3.38860500 |

|   |             |             |             |   |             |             |             |
|---|-------------|-------------|-------------|---|-------------|-------------|-------------|
| H | -0.76521000 | -1.89427600 | -2.48664400 | H | -0.92728000 | -1.73596700 | -2.47129800 |
| H | 0.92390800  | -2.23875400 | -2.87567900 | H | 0.72181800  | -2.28265100 | -2.82938500 |
| O | 1.15629300  | -3.69838100 | -0.59103200 | O | 0.74853100  | -3.80760200 | -0.61662300 |
| O | -1.18406800 | -3.24478600 | -0.34339900 | O | -1.47648500 | -3.12744000 | -0.38100300 |
| C | -1.17723700 | -4.13348700 | 0.80385600  | C | -1.58887200 | -4.03582400 | 0.75701300  |
| H | -2.16340800 | -4.07100600 | 1.25760700  | H | -2.59567100 | -3.90671900 | 1.14406800  |
| H | -0.99614400 | -5.13781700 | 0.43067300  | H | -1.45368800 | -5.04027400 | 0.36575500  |
| H | -0.39945700 | -3.84131800 | 1.50738800  | H | -0.83693000 | -3.79394400 | 1.50396600  |
| H | -1.28731000 | -2.24735300 | -0.05768300 | H | -1.61139800 | -2.14875900 | -0.11161200 |
| H | 0.32765800  | -4.64528100 | -3.36847000 | H | -0.15572100 | -4.56941000 | -3.41482400 |
| H | -1.37178400 | -4.30154000 | -2.98744300 | H | -1.81001800 | -4.03329800 | -3.05610700 |
| C | 3.97720600  | 0.41525100  | 2.64119400  | C | 4.08719600  | 0.12089900  | 2.57394800  |
| C | 1.92148200  | -0.96444100 | 2.92462600  | C | 1.87905100  | -0.95896100 | 2.96709500  |
| C | 3.82539900  | -1.85316200 | 1.60995400  | C | 3.59670400  | -2.13685600 | 1.62973100  |
| C | 4.60148000  | 1.15811600  | -0.80237200 | C | 4.69402200  | 0.81638600  | -0.83048600 |
| C | 3.79733700  | -1.07729500 | -1.58234000 | C | 3.68957200  | -1.34991900 | -1.58363000 |
| C | 2.53284700  | 0.94651200  | -2.21333800 | C | 2.61837100  | 0.77499500  | -2.22757000 |
| C | -4.31892300 | 1.70620600  | -0.95441000 | C | -4.19181300 | 1.98091400  | -0.86764300 |
| C | -2.25222200 | 1.19307900  | -2.28782000 | C | -2.20119000 | 1.34846600  | -2.25595700 |
| C | -3.80432200 | -0.62759100 | -1.68170300 | C | -3.83411300 | -0.37759300 | -1.62117000 |
| C | -3.92113900 | 1.05496800  | 2.50850000  | C | -3.76704100 | 1.24635200  | 2.58203100  |
| C | -4.12411300 | -1.23815200 | 1.56222800  | C | -4.10261100 | -1.01733700 | 1.59296300  |
| C | -2.13961100 | -0.63069400 | 2.92997900  | C | -2.07573600 | -0.54290800 | 2.94045500  |
| H | 2.36494900  | -1.39512300 | 3.82769700  | H | 2.29765300  | -1.41757100 | 3.86980000  |
| H | 1.32264400  | -0.10673300 | 3.23745800  | H | 1.41090600  | -0.01924800 | 3.26761300  |
| H | 1.24773900  | -1.70294200 | 2.48538600  | H | 1.10104900  | -1.62120000 | 2.58039800  |
| H | 4.10287100  | -2.35297400 | 2.54307800  | H | 3.82919300  | -2.64503000 | 2.57207700  |
| H | 3.24095200  | -2.55996400 | 1.01754300  | H | 2.89858300  | -2.77115700 | 1.07723300  |
| H | 4.75189900  | -1.63414400 | 1.07905600  | H | 4.52568800  | -2.06553900 | 1.06377900  |
| H | 4.46443200  | -0.08671800 | 3.48299900  | H | 4.49804300  | -0.39735200 | 3.44806900  |
| H | 4.76562900  | 0.78155400  | 1.98382900  | H | 4.91611900  | 0.31835100  | 1.89411100  |
| H | 3.44386400  | 1.27469000  | 3.04983100  | H | 3.69497100  | 1.07722800  | 2.92463100  |
| H | 3.12881700  | 0.95559300  | -3.13114300 | H | 3.20995600  | 0.71847800  | -3.14791200 |
| H | 1.62187700  | 0.37310300  | -2.40509000 | H | 1.65436000  | 0.29426700  | -2.41707600 |
| H | 2.23804500  | 1.97089700  | -1.99671500 | H | 2.43238600  | 1.82674600  | -2.01714600 |
| H | 5.15634200  | 1.31263700  | -1.73320600 | H | 5.24270900  | 0.93365600  | -1.77242600 |
| H | 4.35673600  | 2.14510700  | -0.40612800 | H | 4.52932600  | 1.81650600  | -0.42361400 |
| H | 5.28043300  | 0.66785700  | -0.10293400 | H | 5.34421000  | 0.26852300  | -0.14624400 |
| H | 4.26619200  | -0.96814500 | -2.56489300 | H | 4.17938900  | -1.29292900 | -2.56195000 |
| H | 4.52236400  | -1.55648800 | -0.92840200 | H | 4.35736700  | -1.89166700 | -0.91590400 |
| H | 2.94736500  | -1.75372200 | -1.69196200 | H | 2.77599800  | -1.93777900 | -1.70453000 |
| H | -4.26008800 | -0.45610900 | -2.66151000 | H | -4.27462500 | -0.17905000 | -2.60433100 |
| H | -3.04484300 | -1.40317300 | -1.80727300 | H | -3.12546000 | -1.20172700 | -1.74218000 |
| H | -4.58172800 | -1.01530800 | -1.02683900 | H | -4.63818900 | -0.70756700 | -0.96601200 |
| H | -2.81583500 | 1.28986200  | -3.22082700 | H | -2.78744800 | 1.49155700  | -3.17029800 |
| H | -1.80960500 | 2.16069200  | -2.06193900 | H | -1.69153000 | 2.28511700  | -2.03696000 |
| H | -1.43526300 | 0.48691400  | -2.45732200 | H | -1.44098500 | 0.58941100  | -2.46137300 |
| H | -4.80776200 | 1.92824800  | -1.90791700 | H | -4.70358300 | 2.22493400  | -1.80564600 |
| H | -5.08654900 | 1.32073200  | -0.28218900 | H | -4.95272800 | 1.64546500  | -0.16111400 |
| H | -3.95460400 | 2.65220100  | -0.55118000 | H | -3.75079000 | 2.90415600  | -0.48714500 |
| H | -2.67835500 | -0.89711500 | 3.84467200  | H | -2.61460700 | -0.77793500 | 3.86516800  |
| H | -1.60761400 | -1.51623900 | 2.57699700  | H | -1.62807100 | -1.46787800 | 2.57032000  |
| H | -1.39088000 | 0.11629800  | 3.19931000  | H | -1.26902400 | 0.14717200  | 3.19704100  |
| H | -4.49869900 | -1.66520400 | 2.49732500  | H | -4.48252000 | -1.44473800 | 2.52733200  |
| H | -4.98983800 | -0.87960000 | 1.00529700  | H | -4.95683700 | -0.60580000 | 1.05454900  |

|               |             |             |                |             |             |
|---------------|-------------|-------------|----------------|-------------|-------------|
| H -3.66498900 | -2.04850200 | 0.99049200  | H -3.68260800  | -1.83674700 | 1.00358400  |
| H -4.53574700 | 0.67011700  | 3.32818600  | H -4.38323900  | 0.87748200  | 3.40973800  |
| H -3.26665000 | 1.81544200  | 2.93561900  | H -3.06212200  | 1.96481400  | 3.00364100  |
| H -4.59280200 | 1.53785100  | 1.79923200  | H -4.42797400  | 1.77414200  | 1.89408900  |
| H -0.60094500 | -3.52794400 | -4.37521700 | H -0.91670900  | -3.31106000 | -4.40171800 |
| <b>2A</b>     |             |             | <b>S-2A</b>    |             |             |
| Pd 0.00485200 | -0.01305500 | -1.01964000 | Pd 0.00051200  | 0.11212000  | -0.99372800 |
| P -2.14667900 | 0.68393700  | -0.62227100 | P -2.15111000  | 0.76272200  | -0.53585100 |
| P 2.15549500  | -0.71251700 | -0.59395600 | P 2.15370000   | -0.62989000 | -0.64972800 |
| C 2.98021200  | -2.23249100 | -1.35157100 | C 2.96308500   | -2.07840600 | -1.55169000 |
| C -2.99022200 | 2.19396000  | -1.37233700 | C -2.96829400  | 2.34892200  | -1.14313400 |
| C 3.47971300  | -1.79119300 | -2.73098800 | C 3.47525200   | -1.51890600 | -2.88117600 |
| H 3.91762800  | -2.65231400 | -3.24306700 | H 3.90819200   | -2.33861000 | -3.46267100 |
| H 2.66759900  | -1.40858900 | -3.35326800 | H 2.66975500   | -1.07784700 | -3.47467300 |
| H 4.24948600  | -1.01995600 | -2.66117100 | H 4.25276700   | -0.76486000 | -2.73856500 |
| C 1.90727600  | -3.31267100 | -1.50570000 | C 1.88641000   | -3.13153600 | -1.81443100 |
| H 2.32828700  | -4.15094000 | -2.06768400 | H 2.31002100   | -3.90841800 | -2.45867100 |
| H 1.57717200  | -3.70158400 | -0.54058600 | H 1.55277800   | -3.61400100 | -0.89394100 |
| H 1.03769200  | -2.94345700 | -2.05460400 | H 1.01697800   | -2.70813600 | -2.32393700 |
| C 4.13453000  | -2.75481500 | -0.49800600 | C 4.10806600   | -2.68505900 | -0.74522100 |
| H 3.81675200  | -3.00101000 | 0.51790700  | H 3.77903300   | -3.02673900 | 0.23914500  |
| H 4.52444800  | -3.67112300 | -0.95114700 | H 4.49608100   | -3.55362900 | -1.28735300 |
| H 4.96207400  | -2.04614100 | -0.44825400 | H 4.93474100   | -1.98483900 | -0.61472500 |
| C -3.56389500 | 1.74210800  | -2.71863500 | C -3.56721500  | 2.02642300  | -2.51443700 |
| H -4.01235600 | 2.60482000  | -3.21847000 | H -3.96948800  | 2.94783800  | -2.94644600 |
| H -2.78880600 | 1.34394500  | -3.37853300 | H -2.81455600  | 1.63620800  | -3.20555700 |
| H -4.34393900 | 0.98733100  | -2.60144200 | H -4.38445700  | 1.30468100  | -2.44840500 |
| C -1.92080800 | 3.26487200  | -1.59638800 | C -1.87637500  | 3.40915800  | -1.29327100 |
| H -2.37301400 | 4.10782000  | -2.12634000 | H -2.32088500  | 4.30640100  | -1.73523700 |
| H -1.52664600 | 3.64968800  | -0.65408400 | H -1.44752800  | 3.69386600  | -0.33061900 |
| H -1.09027900 | 2.89309600  | -2.20097700 | H -1.06917600  | 3.07266900  | -1.94852900 |
| C -4.09312800 | 2.71889600  | -0.45349100 | C -4.04714900  | 2.83468400  | -0.17723600 |
| H -3.69344900 | 3.05429800  | 0.50568500  | H -3.63279500  | 3.06536300  | 0.80719700  |
| H -4.57240600 | 3.57748900  | -0.93360600 | H -4.48782700  | 3.75362900  | -0.57813200 |
| H -4.85819100 | 1.96791200  | -0.25607700 | H -4.84541400  | 2.10217300  | -0.05219600 |
| Fe 0.01500100 | 0.01199800  | 2.02239500  | Fe -0.01629800 | -0.20627700 | 2.04880200  |
| C 2.00104600  | -0.46642800 | 2.34494500  | C 2.00957200   | -0.59755300 | 2.29149100  |
| C 0.24563000  | -1.89012400 | 2.79252600  | C 0.34157000   | -2.14746500 | 2.64808800  |
| C 1.17604600  | -0.98742900 | 3.37507500  | C 1.23088200   | -1.24052100 | 3.28834500  |
| C -0.43698500 | 1.91759600  | 1.31802400  | C -0.57213400  | 1.77176600  | 1.64377700  |
| C -1.15235900 | 1.07288900  | 3.32496800  | C -1.29108500  | 0.55416400  | 3.44943100  |
| C -0.20919600 | 1.94247200  | 2.71169200  | C -0.38828800  | 1.57036100  | 3.02944300  |
| H 2.78823600  | 0.25841500  | 2.47517200  | H 2.76355800   | 0.15237000  | 2.47082500  |
| H -0.52721300 | -2.43315700 | 3.31429800  | H -0.39452500  | -2.77049800 | 3.13456300  |
| H 1.24377100  | -0.73390800 | 4.42189500  | H 1.29875300   | -1.05961700 | 4.35086800  |
| H 0.12609400  | 2.46164600  | 0.57507300  | H -0.02386800  | 2.46646900  | 1.02602100  |
| H -1.22901200 | 0.86581200  | 4.38141000  | H -1.38153000  | 0.15924800  | 4.45054200  |
| H 0.56474800  | 2.50081200  | 3.21545000  | H 0.33780400   | 2.07464500  | 3.64996700  |
| C 0.48005900  | -1.91865000 | 1.40043000  | C 0.55661700   | -2.05838200 | 1.25509200  |
| C 1.60567000  | -1.06150000 | 1.11044400  | C 1.63316900   | -1.12705100 | 1.02196800  |
| C -1.97968300 | 0.51957300  | 2.31537600  | C -2.04928100  | 0.13487500  | 2.32625100  |
| C -1.57059600 | 1.05873200  | 1.06283500  | C -1.64204400  | 0.91131500  | 1.20254700  |
| H -0.07579800 | -2.49801200 | 0.68018500  | H 0.01892700   | -2.60537300 | 0.49628500  |
| H -2.80039200 | -0.16313400 | 2.45883600  | H -2.81598900  | -0.62339200 | 2.32743700  |

|             |             |             |             |               |             |             |             |
|-------------|-------------|-------------|-------------|---------------|-------------|-------------|-------------|
| C           | 3.42351500  | 0.62593100  | -0.46233000 | C             | 3.43791600  | 0.68126700  | -0.43017100 |
| N           | 3.17677500  | 1.67321700  | -1.25191400 | N             | 3.23442100  | 1.77593200  | -1.17210200 |
| C           | 4.54256200  | 0.54786900  | 0.36543500  | C             | 4.53087000  | 0.53850700  | 0.42049000  |
| C           | 4.04843000  | 2.67883400  | -1.24644600 | C             | 4.12436600  | 2.76411600  | -1.08470600 |
| C           | 5.44120400  | 1.60693900  | 0.36450300  | C             | 5.44717700  | 1.57884700  | 0.50441900  |
| H           | 6.32205400  | 1.57824600  | 0.99581700  | H             | 6.30642500  | 1.49806800  | 1.16101000  |
| C           | 5.19309600  | 2.69418700  | -0.45829100 | C             | 5.24220600  | 2.71511400  | -0.26209400 |
| H           | 5.86971100  | 3.53945200  | -0.49303100 | H             | 5.93089200  | 3.55119700  | -0.22813000 |
| H           | 4.71293700  | -0.31474300 | 0.99662800  | H             | 4.66610400  | -0.36009800 | 1.00801700  |
| H           | 3.81813500  | 3.51094800  | -1.90464900 | H             | 3.93116700  | 3.63766600  | -1.70018400 |
| C           | -3.41552800 | -0.64713200 | -0.46671000 | C             | -3.40759700 | -0.58849900 | -0.58079800 |
| N           | -4.38031400 | -0.48552800 | 0.44101800  | N             | -4.50220700 | -0.46552000 | 0.17660600  |
| C           | -3.34100100 | -1.75005600 | -1.31305300 | C             | -3.17623600 | -1.67959100 | -1.41207500 |
| C           | -5.31337700 | -1.43100600 | 0.53019000  | C             | -5.40550300 | -1.44357700 | 0.12267200  |
| C           | -4.32592900 | -2.72488900 | -1.21484800 | C             | -4.12785800 | -2.69062000 | -1.45987400 |
| H           | -4.30489000 | -3.59433800 | -1.86194600 | H             | -3.97931100 | -3.55449300 | -2.09826400 |
| C           | -5.33252900 | -2.56370100 | -0.27635000 | C             | -5.26560400 | -2.57118500 | -0.67843000 |
| H           | -6.12078400 | -3.29837000 | -0.16502900 | H             | -6.03563600 | -3.33384000 | -0.68200700 |
| H           | -2.53045300 | -1.83590800 | -2.02660700 | H             | -2.26977200 | -1.73113900 | -2.00347800 |
| H           | -6.08314000 | -1.27172500 | 1.27917800  | H             | -6.28367300 | -1.31986300 | 0.74978800  |
| H           | 0.00075500  | -0.07649800 | -2.54390700 | H             | 0.00335900  | 0.26622100  | -2.51679500 |
| <b>N-2A</b> |             |             |             | <b>S-N-2A</b> |             |             |             |
| Pd          | 0.05271600  | 0.13452200  | -1.62510900 | Pd            | 0.03773700  | 0.06524800  | -1.64282500 |
| P           | -1.90630600 | 0.75146800  | -0.49399900 | P             | -1.92215300 | 0.73283600  | -0.57820500 |
| P           | 1.96940300  | -0.70882600 | -0.71207900 | P             | 1.93192400  | -0.71964500 | -0.63862800 |
| C           | 3.19448700  | -2.00780500 | -1.37245900 | C             | 3.03284900  | -2.15236700 | -1.24653800 |
| C           | -2.94034000 | 2.32312700  | -0.76926500 | C             | -2.96632700 | 2.27783900  | -0.98208300 |
| C           | 3.87619300  | -1.40488800 | -2.60159800 | C             | 3.78607000  | -1.64484000 | -2.47665600 |
| H           | 4.48596800  | -2.16870800 | -3.09225800 | H             | 4.30601700  | -2.48238700 | -2.95287600 |
| H           | 3.14549200  | -1.04535600 | -3.33071900 | H             | 3.10591700  | -1.21171500 | -3.21646600 |
| H           | 4.54158300  | -0.57722300 | -2.34109800 | H             | 4.53619300  | -0.89312400 | -2.21766500 |
| C           | 2.29998700  | -3.17723400 | -1.80385100 | C             | 2.05086500  | -3.25096600 | -1.66777000 |
| H           | 2.91738600  | -3.93563800 | -2.29355900 | H             | 2.61373100  | -4.07657200 | -2.11536300 |
| H           | 1.80895000  | -3.65185200 | -0.95168300 | H             | 1.49480800  | -3.65199300 | -0.81682300 |
| H           | 1.53347900  | -2.85834900 | -2.51449300 | H             | 1.33229000  | -2.89010900 | -2.40903900 |
| C           | 4.22285300  | -2.49920700 | -0.35703600 | C             | 4.00226300  | -2.70765700 | -0.20833100 |
| H           | 3.75712800  | -2.82518200 | 0.57474800  | H             | 3.49328600  | -3.00072000 | 0.71262900  |
| H           | 4.75871200  | -3.35706100 | -0.77452300 | H             | 4.48656700  | -3.60155000 | -0.61653300 |
| H           | 4.97736000  | -1.74360400 | -0.13015500 | H             | 4.79493500  | -2.00064400 | 0.04113800  |
| C           | -3.68626100 | 2.14111200  | -2.09309300 | C             | -3.74548500 | 1.96621300  | -2.26075700 |
| H           | -4.19379100 | 3.07453400  | -2.35359100 | H             | -4.24520000 | 2.87497900  | -2.61246400 |
| H           | -3.00470900 | 1.89428400  | -2.91230600 | H             | -3.08676000 | 1.61827000  | -3.06278700 |
| H           | -4.44585000 | 1.35969900  | -2.03069200 | H             | -4.51394500 | 1.20691300  | -2.09704800 |
| C           | -1.95648000 | 3.48893300  | -0.89763300 | C             | -1.97889600 | 3.41489200  | -1.25270900 |
| H           | -2.50984800 | 4.40723900  | -1.11620000 | H             | -2.53184300 | 4.31248300  | -1.55032400 |
| H           | -1.40180000 | 3.65559700  | 0.02889300  | H             | -1.39377700 | 3.66835700  | -0.36498100 |
| H           | -1.24522300 | 3.32195900  | -1.71162700 | H             | -1.28482800 | 3.16234800  | -2.05957400 |
| C           | -3.91915100 | 2.58808900  | 0.37273800  | C             | -3.91939800 | 2.67701000  | 0.14071500  |
| H           | -3.39733300 | 2.76848100  | 1.31464200  | H             | -3.37957900 | 2.93666300  | 1.05472400  |
| H           | -4.50931600 | 3.48091800  | 0.14200100  | H             | -4.49309500 | 3.55919500  | -0.16644300 |
| H           | -4.60504400 | 1.75397100  | 0.52284000  | H             | -4.62479200 | 1.87900700  | 0.37679500  |
| Fe          | 0.04548400  | -0.38490200 | 2.14149100  | Fe            | -0.00490200 | -0.16602600 | 2.17570700  |
| C           | 1.97454300  | -1.07713800 | 2.25117600  | C             | 1.92583500  | -0.84429600 | 2.34953900  |
| C           | 0.11499100  | -2.41925800 | 2.45226900  | C             | 0.06377100  | -2.16286400 | 2.66679600  |

|                   |             |             |                     |             |             |
|-------------------|-------------|-------------|---------------------|-------------|-------------|
| C 1.15249900      | -1.77440600 | 3.17647500  | C 1.09869600        | -1.45259500 | 3.33344500  |
| C -0.22767900     | 1.58767800  | 1.67477400  | C -0.24719900       | 1.75778300  | 1.50704500  |
| C -1.10587600     | 0.58614100  | 3.54009500  | C -1.14252500       | 0.95550800  | 3.46410800  |
| C -0.07159700     | 1.44208900  | 3.07743800  | C -0.09681200       | 1.74942500  | 2.91887200  |
| H 2.83433900      | -0.48044400 | 2.51211600  | H 2.78468300        | -0.22571900 | 2.55749900  |
| H -0.68396800     | -3.00820700 | 2.87530200  | H -0.73775300       | -2.71306300 | 3.13773400  |
| H 1.28063600      | -1.78488900 | 4.24812600  | H 1.22332400        | -1.36233400 | 4.40299700  |
| H 0.40889800      | 2.16350900  | 1.02338800  | H 0.40456500        | 2.25333600  | 0.80372000  |
| H -1.24716400     | 0.25396600  | 4.55743400  | H -1.28950200       | 0.72766700  | 4.51028000  |
| H 0.70585200      | 1.88487600  | 3.68113300  | H 0.69033100        | 2.23744500  | 3.47524800  |
| C 0.28230400      | -2.11622700 | 1.07823500  | C 0.24232500        | -1.98839700 | 1.26986500  |
| C 1.45107900      | -1.29483500 | 0.93605300  | C 1.40923100        | -1.18078900 | 1.05776600  |
| C -1.90830500     | 0.21493100  | 2.42914900  | C -1.94584500       | 0.48180900  | 2.39045400  |
| C -1.37627600     | 0.83629000  | 1.25948600  | C -1.40410000       | 0.98213700  | 1.16559200  |
| H -0.36642000     | -2.42616600 | 0.27356400  | H -0.39856100       | -2.38097300 | 0.49486500  |
| H -2.77248100     | -0.42779200 | 2.44473400  | H -2.81194600       | -0.15429600 | 2.47794000  |
| C 3.02654100      | 0.79193100  | -0.30188700 | C 3.13526000        | 0.68074000  | -0.33127800 |
| N 2.49793600      | 1.91062200  | -0.83836600 | N 2.81515600        | 1.79975300  | -1.01460300 |
| C 4.21185200      | 0.92852600  | 0.40591400  | C 4.27849400        | 0.72072700  | 0.44930600  |
| C 3.03176200      | 3.13291600  | -0.73693500 | C 3.52358400        | 2.93420100  | -0.99437100 |
| C 4.80482300      | 2.17996900  | 0.53096200  | C 5.04478200        | 1.88034800  | 0.49767800  |
| H 5.73192600      | 2.28405900  | 1.08324300  | H 5.93905300        | 1.90609600  | 1.10972000  |
| C 4.21532600      | 3.29760300  | -0.04998300 | C 4.67011900        | 2.99885100  | -0.23351100 |
| H 4.66022000      | 4.28045700  | 0.03154200  | H 5.24991900        | 3.91198800  | -0.21413600 |
| H 4.66744500      | 0.06125000  | 0.86085300  | H 4.57343300        | -0.14604600 | 1.02237300  |
| H 2.49396100      | 3.94135800  | -1.21519000 | H 3.14321500        | 3.75249400  | -1.59097200 |
| C -3.14939500     | -0.63157000 | -0.55793300 | C -3.16748000       | -0.65161600 | -0.49891700 |
| N -4.07978600     | -0.73176100 | 0.39495800  | N -4.16558800       | -0.62340000 | 0.39205100  |
| C -3.09037600     | -1.50898300 | -1.63974500 | C -3.02257400       | -1.68872500 | -1.41946000 |
| C -4.97974100     | -1.70825000 | 0.29377100  | C -5.04239800       | -1.62822500 | 0.38567900  |
| C -4.03696700     | -2.51953000 | -1.73864600 | C -3.94404500       | -2.72724300 | -1.42027600 |
| H -4.01838700     | -3.21179500 | -2.57285400 | H -3.85251700       | -3.54408200 | -2.12814600 |
| C -5.00444600     | -2.62344800 | -0.75196600 | C -4.97839900       | -2.69832000 | -0.49782100 |
| H -5.76474700     | -3.39436900 | -0.78536500 | H -5.72235500       | -3.48549900 | -0.45594600 |
| H -2.31475200     | -1.39174200 | -2.38853000 | H -2.19135000       | -1.67258300 | -2.11668900 |
| H -5.71947500     | -1.75775600 | 1.08751400  | H -5.83773400       | -1.57397300 | 1.12430300  |
| H 1.57183400      | 1.72842500  | -1.31502900 | H 1.94534000        | 1.75158500  | -1.56404100 |
| <b>TS-2A_N-2A</b> |             |             | <b>S-TS-2A_N-2A</b> |             |             |
| Pd -0.03199200    | -0.16754900 | -1.34583700 | Pd -0.07788300      | -0.06892600 | -1.31203800 |
| P -2.02678500     | 0.75794400  | -0.53033700 | P -2.05619800       | 0.79665400  | -0.48114800 |
| P 2.10344300      | -0.69504400 | -0.64023600 | P 2.10301500        | -0.59331200 | -0.67252100 |
| C 3.17682200      | -2.04190000 | -1.41701200 | C 3.08945100        | -1.96974500 | -1.52417300 |
| C -2.92849400     | 2.35525700  | -0.99090500 | C -2.87622400       | 2.44292800  | -0.91375700 |
| C 3.70050600      | -1.47397200 | -2.73899600 | C 3.66647000        | -1.35878900 | -2.80320300 |
| H 4.25460700      | -2.25322300 | -3.26956300 | H 4.16225000        | -2.14607600 | -3.37974400 |
| H 2.88682800      | -1.14132700 | -3.38812800 | H 2.88554200        | -0.92471500 | -3.43414200 |
| H 4.37900700      | -0.63253500 | -2.58410100 | H 4.40741100        | -0.58456100 | -2.59063300 |
| C 2.24801800      | -3.22925300 | -1.68965800 | C 2.09080200        | -3.07087800 | -1.88549800 |
| H 2.80712200      | -4.00307900 | -2.22305500 | H 2.60374600        | -3.83049600 | -2.48393700 |
| H 1.87088500      | -3.67586300 | -0.76733800 | H 1.68774100        | -3.56624100 | -0.99968400 |
| H 1.39931600      | -2.94409400 | -2.31752100 | H 1.25730000        | -2.68392200 | -2.47869000 |
| C 4.33034700      | -2.48229600 | -0.51729400 | C 4.20229100        | -2.53907300 | -0.64959200 |
| H 3.98418500      | -2.80907200 | 0.46588700  | H 3.82333900        | -2.91524400 | 0.30375500  |
| H 4.84034800      | -3.32993400 | -0.98460600 | H 4.66946500        | -3.37906900 | -1.17502500 |



|               |             |             |               |             |             |
|---------------|-------------|-------------|---------------|-------------|-------------|
| H 5.07473200  | -1.69547700 | -0.38830400 | H 4.98527400  | -1.80556200 | -0.45035000 |
| C -3.58040200 | 2.12641400  | -2.35649500 | C -3.52119300 | 2.26257800  | -2.28959100 |
| H -4.04975300 | 3.05745400  | -2.68594500 | H -3.93039400 | 3.22345900  | -2.61635200 |
| H -2.84682700 | 1.84000600  | -3.11483000 | H -2.79407000 | 1.93784500  | -3.03948200 |
| H -4.35910400 | 1.36216600  | -2.31918400 | H -4.34110700 | 1.54110300  | -2.26839400 |
| C -1.88589400 | 3.46995800  | -1.09445300 | C -1.78828600 | 3.51417400  | -0.98993700 |
| H -2.38211900 | 4.38540100  | -1.42904200 | H -2.24850100 | 4.45470900  | -1.30921200 |
| H -1.41997000 | 3.68491500  | -0.13126500 | H -1.31626400 | 3.68997700  | -0.02137200 |
| H -1.10314400 | 3.22989800  | -1.81792400 | H -1.01056100 | 3.25649500  | -1.71315500 |
| C -3.97583700 | 2.70039200  | 0.06665000  | C -3.92114800 | 2.83438600  | 0.12933000  |
| H -3.52079800 | 2.87360900  | 1.04365800  | H -3.47747400 | 2.95585700  | 1.12045500  |
| H -4.48997300 | 3.61980400  | -0.22960200 | H -4.36198900 | 3.79489500  | -0.15786000 |
| H -4.72460200 | 1.91513400  | 0.17631900  | H -4.72524200 | 2.10087700  | 0.19974100  |
| Fe 0.06555100 | -0.25261100 | 2.08139500  | Fe 0.00888100 | -0.35248200 | 2.10441700  |
| C 1.99850700  | -0.90268700 | 2.32879300  | C 1.99424200  | -0.87350300 | 2.29238700  |
| C 0.14891800  | -2.26017100 | 2.54611200  | C 0.24716500  | -2.36598500 | 2.47223700  |
| C 1.13943500  | -1.53885800 | 3.26366900  | C 1.19183500  | -1.60302500 | 3.21058400  |
| C -0.20841300 | 1.68922000  | 1.45810000  | C -0.37770400 | 1.63328900  | 1.68685400  |
| C -1.00186600 | 0.85468600  | 3.44305100  | C -1.19548700 | 0.51202600  | 3.51745700  |
| C 0.01850900  | 1.65080900  | 2.85567800  | C -0.21080700 | 1.44076700  | 3.08121900  |
| H 2.82768200  | -0.26044800 | 2.57813200  | H 2.78138900  | -0.18706600 | 2.56027700  |
| H -0.65623600 | -2.83674800 | 2.97404400  | H -0.51323700 | -3.01347800 | 2.88357800  |
| H 1.21567200  | -1.46446500 | 4.33760400  | H 1.27345800  | -1.56029800 | 4.28690500  |
| H 0.41210700  | 2.18188400  | 0.72600900  | H 0.23420300  | 2.26142200  | 1.05775400  |
| H -1.09378200 | 0.61281600  | 4.49100500  | H -1.31235400 | 0.13400400  | 4.52274100  |
| H 0.83809100  | 2.12146900  | 3.37651100  | H 0.55343300  | 1.89510700  | 3.69467800  |
| C 0.39400500  | -2.07632500 | 1.16324700  | C 0.46530200  | -2.11248600 | 1.09533300  |
| C 1.55859600  | -1.24418900 | 1.01247000  | C 1.57014800  | -1.20276700 | 0.96842400  |
| C -1.87147000 | 0.40974900  | 2.41484600  | C -1.98279700 | 0.13791500  | 2.39657100  |
| C -1.39949000 | 0.93780100  | 1.17482500  | C -1.50066300 | 0.85017600  | 1.25593800  |
| H -0.18595800 | -2.51751400 | 0.36475200  | H -0.09973000 | -2.54151800 | 0.28007400  |
| H -2.74791100 | -0.20562600 | 2.52764200  | H -2.80840200 | -0.55538200 | 2.40426400  |
| C 3.14357600  | 0.81835200  | -0.40274900 | C 3.28303000  | 0.80178300  | -0.37553100 |
| N 2.72281600  | 1.88318700  | -1.08983300 | N 3.05210200  | 1.89838600  | -1.10474000 |
| C 4.27740300  | 0.85288800  | 0.40588100  | C 4.35420000  | 0.70303900  | 0.50972500  |
| C 3.42131400  | 3.01250300  | -1.00410300 | C 3.88225300  | 2.93181300  | -0.96757200 |
| C 4.99658100  | 2.03805600  | 0.49445300  | C 5.20880700  | 1.78897500  | 0.64686600  |
| H 5.88227200  | 2.09489400  | 1.11691300  | H 6.04811300  | 1.73957400  | 1.33184400  |
| C 4.56650100  | 3.13962300  | -0.22762700 | C 4.97063000  | 2.92808500  | -0.10539200 |
| H 5.10086600  | 4.08107800  | -0.19184100 | H 5.61155600  | 3.79880400  | -0.03171600 |
| H 4.59576500  | -0.02076500 | 0.95834200  | H 4.52378100  | -0.19915200 | 1.08141800  |
| H 3.04674700  | 3.85046600  | -1.58356000 | H 3.66438500  | 3.80454800  | -1.57616200 |
| C -3.31888000 | -0.57112500 | -0.49823000 | C -3.37109800 | -0.50462100 | -0.56084400 |
| N -4.12955000 | -0.66554000 | 0.55730600  | N -4.37898600 | -0.48018900 | 0.31663700  |
| C -3.41394800 | -1.41916500 | -1.60121300 | C -3.26162500 | -1.46744800 | -1.56107500 |
| C -5.06576200 | -1.61181600 | 0.54291900  | C -5.31426700 | -1.42429400 | 0.21440900  |
| C -4.39946500 | -2.39805700 | -1.60756500 | C -4.24405700 | -2.44440300 | -1.65752400 |
| H -4.50398000 | -3.06798500 | -2.45337200 | H -4.18813300 | -3.20654700 | -2.42700800 |
| C -5.24360500 | -2.49837000 | -0.51355600 | C -5.29331400 | -2.42248900 | -0.75288500 |
| H -6.02635400 | -3.24598400 | -0.47252300 | H -6.08458900 | -3.16225900 | -0.78746500 |
| H -2.73770000 | -1.30392100 | -2.44136300 | H -2.42172200 | -1.44527700 | -2.24780000 |
| H -5.70726500 | -1.66020700 | 1.41771100  | H -6.12087300 | -1.37995500 | 0.94072300  |
| H 0.65074200  | 1.12024200  | -1.74798900 | H 0.37216000  | 1.32117100  | -1.66391600 |
| <b>2B</b>     |             |             | <b>S-2B</b>   |             |             |

|    |             |             |             |    |             |             |             |
|----|-------------|-------------|-------------|----|-------------|-------------|-------------|
| Pd | 0.08860100  | -1.75436000 | -0.01491800 | Pd | -0.03008300 | -1.75111500 | 0.01378000  |
| P  | -1.78733600 | -0.51500800 | -0.61005800 | P  | -1.75650000 | -0.36967300 | -0.69063700 |
| P  | 1.70701100  | -0.09338700 | 0.78380000  | P  | 1.79265400  | -0.27279500 | 0.70194100  |
| C  | 2.46592500  | -0.46395400 | 2.49451100  | C  | 2.67332400  | -0.90668200 | 2.27258600  |
| C  | -3.03146800 | -1.19534100 | -1.88763200 | C  | -2.77851800 | -0.89372700 | -2.21658800 |
| C  | -2.80199400 | -0.15198400 | 0.90187500  | C  | -2.98445300 | -0.16020100 | 0.68630500  |
| C  | 3.11093600  | -0.22700700 | -0.42098500 | C  | 3.10553800  | -0.21433300 | -0.60819100 |
| N  | -3.67681900 | 0.85342300  | 0.84291100  | N  | -3.97952200 | 0.71597800  | 0.51792100  |
| N  | 2.95391100  | -1.24803300 | -1.27245600 | N  | 2.89756300  | -1.09232900 | -1.59804600 |
| C  | 4.23201300  | 0.59968200  | -0.44987200 | C  | 4.23042400  | 0.60734100  | -0.57007800 |
| C  | 3.90488500  | -1.46946000 | -2.17823700 | C  | 3.79918200  | -1.17002400 | -2.57705700 |
| C  | 5.21542000  | 0.36082400  | -1.40058200 | C  | 5.15883400  | 0.52122900  | -1.59887000 |
| H  | 6.09794400  | 0.98895500  | -1.44482800 | H  | 6.04077300  | 1.15245200  | -1.59181600 |
| C  | 5.05148400  | -0.69321300 | -2.28542600 | C  | 4.94238500  | -0.38467200 | -2.62520000 |
| H  | 5.79361100  | -0.91480900 | -3.04267100 | H  | 5.64109400  | -0.48594600 | -3.44742200 |
| H  | 4.34235100  | 1.41193600  | 0.25528000  | H  | 4.39064600  | 1.29865300  | 0.24562000  |
| H  | 3.73958000  | -2.30660400 | -2.84955000 | H  | 3.59512100  | -1.89487000 | -3.35974800 |
| C  | -2.65596600 | -0.95716300 | 2.02849000  | C  | -2.85423500 | -0.93771100 | 1.83342400  |
| C  | -4.43354200 | 1.08993400  | 1.91233400  | C  | -4.87429100 | 0.84403300  | 1.49700000  |
| C  | -3.45698300 | -0.70768300 | 3.13537000  | C  | -3.79488400 | -0.79702500 | 2.84601600  |
| H  | -3.37076200 | -1.31995700 | 4.02584000  | H  | -3.71898600 | -1.38978600 | 3.75099200  |
| C  | -4.36431400 | 0.33814100  | 3.07942400  | C  | -4.82624900 | 0.11240600  | 2.67721800  |
| H  | -5.00871200 | 0.57144800  | 3.91825300  | H  | -5.58297200 | 0.25734000  | 3.43937200  |
| H  | -1.92696800 | -1.75841300 | 2.02934700  | H  | -2.03151400 | -1.63769500 | 1.92380200  |
| H  | -5.13114400 | 1.91785000  | 1.82879100  | H  | -5.66863200 | 1.56582000  | 1.32905100  |
| C  | 1.31465800  | -0.47969600 | 3.50382400  | C  | 1.56974500  | -1.28727800 | 3.26292800  |
| H  | 1.70084300  | -0.77570200 | 4.48355700  | H  | 2.02626500  | -1.69142700 | 4.17242300  |
| H  | 0.85586300  | 0.50383300  | 3.61814300  | H  | 0.96633400  | -0.42382400 | 3.55356500  |
| H  | 0.53880500  | -1.19555200 | 3.22089900  | H  | 0.90209100  | -2.04948100 | 2.85246800  |
| C  | 3.49650900  | 0.58581500  | 2.90878300  | C  | 3.58133800  | 0.14519800  | 2.90585800  |
| H  | 3.80781600  | 0.39216000  | 3.93981700  | H  | 4.01383400  | -0.26970700 | 3.82280800  |
| H  | 4.39516100  | 0.54269400  | 2.29186500  | H  | 4.41166300  | 0.42578700  | 2.25531200  |
| H  | 3.09068300  | 1.59861200  | 2.87195400  | H  | 3.03330600  | 1.04930300  | 3.17939400  |
| C  | 3.12030900  | -1.84516100 | 2.44375400  | C  | 3.48898200  | -2.14582800 | 1.90592300  |
| H  | 3.91839100  | -1.89828400 | 1.70047300  | H  | 4.32462900  | -1.90510500 | 1.24500100  |
| H  | 3.56200300  | -2.06847900 | 3.41912700  | H  | 3.90273300  | -2.58277800 | 2.82046800  |
| H  | 2.39449500  | -2.63299900 | 2.23063900  | H  | 2.88002800  | -2.91344700 | 1.42179400  |
| C  | -3.77590400 | -2.38575600 | -1.28306600 | C  | -3.77488200 | -1.98017400 | -1.81038200 |
| H  | -4.46656400 | -2.78627000 | -2.03051200 | H  | -4.28302100 | -2.34189500 | -2.71024600 |
| H  | -3.10782500 | -3.19362600 | -0.98896500 | H  | -3.29745800 | -2.83670800 | -1.33558800 |
| H  | -4.36954200 | -2.09361300 | -0.41464700 | H  | -4.53953600 | -1.59444200 | -1.13274500 |
| C  | -2.24073000 | -1.61063200 | -3.12974600 | C  | -1.79865900 | -1.42187900 | -3.26608200 |
| H  | -2.93247900 | -2.02106500 | -3.87081100 | H  | -2.36010400 | -1.70265400 | -4.16326300 |
| H  | -1.73815700 | -0.75713300 | -3.58895900 | H  | -1.06938200 | -0.66199800 | -3.55802800 |
| H  | -1.49107200 | -2.37214400 | -2.91363800 | H  | -1.25398600 | -2.30193600 | -2.92011000 |
| C  | -4.04106100 | -0.11100400 | -2.27532600 | C  | -3.54397700 | 0.29687200  | -2.79704100 |
| H  | -4.76734500 | -0.55104500 | -2.96557800 | H  | -4.15427200 | -0.06252800 | -3.63258400 |
| H  | -4.58451500 | 0.27669200  | -1.41366100 | H  | -4.21042700 | 0.75060900  | -2.06231700 |
| H  | -3.56456300 | 0.72607800  | -2.78591000 | H  | -2.87474200 | 1.06747100  | -3.18329500 |
| Fe | -0.04063000 | 2.44462000  | -0.51045200 | Fe | 0.05664800  | 2.49352900  | -0.07045100 |
| C  | 1.83688300  | 2.80068000  | 0.18617700  | C  | 1.94253500  | 2.69343500  | 0.66975400  |
| C  | -0.07318100 | 3.51852300  | 1.25081200  | C  | 0.04024500  | 3.18563400  | 1.87241100  |
| C  | 1.01865000  | 3.93206600  | 0.44394900  | C  | 1.12900900  | 3.75220900  | 1.15644900  |
| C  | -0.10554700 | 1.21850900  | -2.13300200 | C  | -0.03376500 | 1.57991200  | -1.89075200 |
| C  | -1.15320200 | 3.26255700  | -2.04079800 | C  | -1.03352900 | 3.59741700  | -1.42196700 |

|           |             |             |             |             |             |             |             |
|-----------|-------------|-------------|-------------|-------------|-------------|-------------|-------------|
| C         | -0.03271800 | 2.56604600  | -2.56805600 | C           | 0.07154100  | 2.98369200  | -2.07209200 |
| H         | 2.71797300  | 2.79866600  | -0.43363100 | H           | 2.82503300  | 2.81737700  | 0.06353100  |
| H         | -0.88375000 | 4.14331700  | 1.59247700  | H           | -0.76559100 | 3.72970400  | 2.34314300  |
| H         | 1.18551800  | 4.92754700  | 0.06204200  | H           | 1.29761700  | 4.80516200  | 0.98238600  |
| H         | 0.61066800  | 0.43858800  | -2.34342900 | H           | 0.66740200  | 0.83939000  | -2.24522800 |
| H         | -1.36398700 | 4.31335000  | -2.16913200 | H           | -1.22351100 | 4.65902400  | -1.35585700 |
| H         | 0.75568600  | 2.99266100  | -3.16880900 | H           | 0.87183000  | 3.49448600  | -2.58750500 |
| C         | 0.05926600  | 2.12800400  | 1.49310000  | C           | 0.17142900  | 1.77344700  | 1.82742300  |
| C         | 1.25335600  | 1.66640800  | 0.84203400  | C           | 1.35681800  | 1.45257100  | 1.08395200  |
| C         | -1.93031000 | 2.35276800  | -1.27914100 | C           | -1.82998400 | 2.57708100  | -0.83687000 |
| C         | -1.28486700 | 1.07352700  | -1.32733700 | C           | -1.21444200 | 1.31404700  | -1.12247000 |
| H         | -0.63909300 | 1.51486000  | 2.04012400  | H           | -0.51965700 | 1.05937700  | 2.24897800  |
| H         | -2.83327400 | 2.56596300  | -0.73207500 | H           | -2.73520800 | 2.72019000  | -0.26998500 |
| H         | 1.37683800  | -3.12720200 | 0.27143300  | H           | 1.02777600  | -3.28052700 | 0.43711300  |
| C         | -0.63169200 | -3.64240200 | -0.44886300 | C           | -1.03825300 | -3.53286500 | -0.26628000 |
| C         | 0.72777000  | -4.04822800 | -0.02627000 | C           | 0.23057900  | -4.10605900 | 0.22879400  |
| H         | 1.33390400  | -4.48025600 | -0.82155600 | H           | 0.75724600  | -4.72155000 | -0.50113500 |
| H         | -1.44342000 | -3.92507500 | 0.21513400  | H           | -1.89904500 | -3.61582800 | 0.39148600  |
| H         | -0.87503100 | -3.78961000 | -1.49517700 | H           | -1.27469000 | -3.72638100 | -1.30745900 |
| H         | 0.75856700  | -4.65754800 | 0.87637400  | H           | 0.15895800  | -4.59901500 | 1.19806200  |
| <b>2C</b> |             |             |             | <b>S-2C</b> |             |             |             |
| Pd        | 0.20243200  | -1.53831600 | -0.69364200 | Pd          | 0.18302900  | -1.55448000 | -0.61109300 |
| P         | -1.95764500 | -0.25026900 | -0.41835600 | P           | -1.94534200 | -0.20159400 | -0.45153200 |
| P         | 1.68544300  | -0.03852500 | 0.53711100  | P           | 1.70764600  | -0.04776700 | 0.54309000  |
| C         | 1.55609500  | -0.18139900 | 2.43108000  | C           | 1.60975600  | -0.22197800 | 2.43620700  |
| C         | -3.34983400 | -0.65641000 | -1.68237900 | C           | -3.21218200 | -0.56548600 | -1.85023900 |
| C         | -2.77789100 | -0.72414800 | 1.18184600  | C           | -2.88752700 | -0.69849200 | 1.07077300  |
| C         | 3.51527500  | -0.24226900 | 0.23189000  | C           | 3.53027900  | -0.25152400 | 0.18140200  |
| N         | -3.69761700 | 0.09908300  | 1.68292700  | N           | -3.89712000 | 0.07530100  | 1.47772400  |
| N         | 4.04889700  | -1.36276900 | 0.72508100  | N           | 4.10187300  | -1.34995200 | 0.68576900  |
| C         | 4.27376700  | 0.71413500  | -0.43816200 | C           | 4.24918600  | 0.68379200  | -0.55980000 |
| C         | 5.35466000  | -1.56783300 | 0.56991400  | C           | 5.40183100  | -1.54844400 | 0.47214800  |
| C         | 5.63540300  | 0.48830300  | -0.59505200 | C           | 5.60343000  | 0.46539200  | -0.77632100 |
| H         | 6.25169500  | 1.21767800  | -1.10831300 | H           | 6.18398400  | 1.18204700  | -1.34702100 |
| C         | 6.19154500  | -0.67292400 | -0.08387400 | C           | 6.19702000  | -0.67172900 | -0.25232600 |
| H         | 7.24896900  | -0.88493600 | -0.18375100 | H           | 7.25061500  | -0.87991500 | -0.39694100 |
| H         | 3.82067300  | 1.61789300  | -0.82069900 | H           | 3.77310500  | 1.56849300  | -0.95815500 |
| H         | 5.74549000  | -2.48969700 | 0.98974900  | H           | 5.82483700  | -2.45175400 | 0.90256900  |
| C         | -2.46969400 | -1.95283100 | 1.76317500  | C           | -2.55295100 | -1.89354700 | 1.70244300  |
| C         | -4.34056900 | -0.27473700 | 2.78735900  | C           | -4.60560900 | -0.32433700 | 2.53351100  |
| C         | -3.15259900 | -2.33793500 | 2.90869300  | C           | -3.30197700 | -2.30215000 | 2.79803300  |
| H         | -2.93966100 | -3.28978100 | 3.38175800  | H           | -3.06568000 | -3.22864300 | 3.30992000  |
| C         | -4.10758800 | -1.48220700 | 3.43510400  | C           | -4.35012600 | -1.50222400 | 3.22475200  |
| H         | -4.66310700 | -1.73898600 | 4.32889200  | H           | -4.96032300 | -1.77689500 | 4.07726600  |
| H         | -1.71149000 | -2.59285900 | 1.32637400  | H           | -1.72068600 | -2.48717400 | 1.34074200  |
| H         | -5.07958800 | 0.42424400  | 3.16724400  | H           | -5.41787300 | 0.32851500  | 2.84048300  |
| C         | 0.24345600  | 0.44494300  | 2.89671300  | C           | 0.31396100  | 0.41535700  | 2.93162600  |
| H         | 0.13989600  | 0.27158500  | 3.97180300  | H           | 0.20559600  | 0.18620000  | 3.99657400  |
| H         | 0.20484300  | 1.51923200  | 2.72502400  | H           | 0.31479500  | 1.49899200  | 2.82326800  |
| H         | -0.61596200 | -0.01404900 | 2.40846600  | H           | -0.55962500 | 0.01188800  | 2.41853200  |
| C         | 2.73847500  | 0.50184700  | 3.12364000  | C           | 2.80620400  | 0.42955800  | 3.13146300  |
| H         | 2.57540800  | 0.45914300  | 4.20461600  | H           | 2.65599900  | 0.35297500  | 4.21343200  |
| H         | 3.68046900  | -0.00232400 | 2.91282900  | H           | 3.74395700  | -0.07195700 | 2.89184700  |
| H         | 2.84274800  | 1.55186500  | 2.84778700  | H           | 2.90803300  | 1.48821200  | 2.88687800  |

|                 |             |             |             |                   |             |             |             |
|-----------------|-------------|-------------|-------------|-------------------|-------------|-------------|-------------|
| C               | 1.54883100  | -1.67539600 | 2.77604400  | C                 | 1.57549900  | -1.72141000 | 2.75195600  |
| H               | 2.46680300  | -2.16786500 | 2.45698500  | H                 | 2.48916300  | -2.22469700 | 2.43556200  |
| H               | 1.45778100  | -1.78189200 | 3.86115300  | H                 | 1.47224700  | -1.84452600 | 3.83505500  |
| H               | 0.70058700  | -2.18787000 | 2.31594200  | H                 | 0.72477800  | -2.21266600 | 2.27201800  |
| C               | -3.91148100 | -2.04202400 | -1.34947200 | C                 | -3.86328700 | -1.92299700 | -1.57080200 |
| H               | -4.57953700 | -2.35117700 | -2.15810600 | H                 | -4.43890100 | -2.21637200 | -2.45434900 |
| H               | -3.14455000 | -2.81193900 | -1.25515200 | H                 | -3.14801700 | -2.72032600 | -1.37173700 |
| H               | -4.49328000 | -2.03155000 | -0.42753500 | H                 | -4.55385600 | -1.87193300 | -0.72708100 |
| C               | -2.76627800 | -0.66501200 | -3.09730100 | C                 | -2.45773900 | -0.61271300 | -3.18114200 |
| H               | -3.56220400 | -0.90860800 | -3.80681700 | H                 | -3.17316400 | -0.80233200 | -3.98794600 |
| H               | -2.36101000 | 0.30325600  | -3.39159000 | H                 | -1.94855900 | 0.32644500  | -3.40643600 |
| H               | -1.97902100 | -1.40980300 | -3.22241900 | H                 | -1.71286100 | -1.41153900 | -3.20331700 |
| C               | -4.48542900 | 0.36547300  | -1.58541800 | C                 | -4.32542600 | 0.48252700  | -1.90983500 |
| H               | -5.31193800 | 0.02454300  | -2.21653000 | H                 | -5.08686400 | 0.12940300  | -2.61349200 |
| H               | -4.85663400 | 0.46511300  | -0.56464000 | H                 | -4.80550100 | 0.62104800  | -0.93934800 |
| H               | -4.18712700 | 1.35307700  | -1.93455500 | H                 | -3.97566400 | 1.45120800  | -2.26422800 |
| Fe              | -0.23119100 | 2.76308300  | -0.38725200 | Fe                | -0.20357100 | 2.79090900  | -0.30254400 |
| C               | 1.36386000  | 2.02565500  | -1.38797600 | C                 | 1.33439000  | 2.01546500  | -1.36390200 |
| C               | 1.41771600  | 3.98444600  | -0.18609400 | C                 | 1.47638100  | 3.97918700  | -0.17610800 |
| C               | 1.35396000  | 3.44085300  | -1.49641900 | C                 | 1.34674400  | 3.42991400  | -1.48055500 |
| C               | -1.86321600 | 2.42729600  | -1.53722200 | C                 | -1.88048300 | 2.55800400  | -1.41545100 |
| C               | -1.88102700 | 3.77365600  | 0.32347800  | C                 | -1.81142800 | 3.76484600  | 0.54134500  |
| C               | -1.86320700 | 3.77623100  | -1.09488700 | C                 | -1.84425300 | 3.87144800  | -0.87449500 |
| H               | 1.31714500  | 1.32336800  | -2.20688300 | H                 | 1.23632500  | 1.30729600  | -2.17375900 |
| H               | 1.38487500  | 5.03277400  | 0.06842700  | H                 | 1.47301100  | 5.03023700  | 0.07412600  |
| H               | 1.27216100  | 4.00291000  | -2.41404100 | H                 | 1.23401000  | 3.98868000  | -2.39809400 |
| H               | -1.82505000 | 2.11579000  | -2.56786500 | H                 | -1.88251800 | 2.32046900  | -2.46686400 |
| H               | -1.86021900 | 4.64413900  | 0.96107700  | H                 | -1.75228700 | 4.58549200  | 1.24145900  |
| H               | -1.82237500 | 4.64688100  | -1.73128300 | H                 | -1.81191000 | 4.78660500  | -1.44758900 |
| C               | 1.47946800  | 2.91225600  | 0.74000200  | C                 | 1.55944400  | 2.90972100  | 0.75309500  |
| C               | 1.44959900  | 1.68273300  | 0.00567700  | C                 | 1.47465100  | 1.67947300  | 0.02624300  |
| C               | -1.89962000 | 2.42671500  | 0.76474500  | C                 | -1.83111300 | 2.38736900  | 0.88115800  |
| C               | -1.90235700 | 1.57527600  | -0.38526200 | C                 | -1.88961300 | 1.62359900  | -0.32955400 |
| H               | 1.53019400  | 3.02108000  | 1.81050000  | H                 | 1.65686400  | 3.01678700  | 1.82146800  |
| H               | -1.93481100 | 2.10098700  | 1.78927800  | H                 | -1.81706100 | 1.98756000  | 1.88116400  |
| C               | 1.91208200  | -2.78581700 | -1.06349000 | C                 | 1.86378900  | -2.83084500 | -0.97177500 |
| C               | -0.57484300 | -3.00155900 | -1.69038300 | C                 | -0.64860800 | -3.10959500 | -1.39217400 |
| O               | -0.92445000 | -3.90633600 | -2.27382300 | O                 | -1.02244500 | -4.09024100 | -1.81963400 |
| C               | 2.57312900  | -2.39458300 | -2.36512100 | C                 | 2.44274400  | -2.49573400 | -2.32633600 |
| H               | 1.92771700  | -2.54630800 | -3.23304600 | H                 | 1.73726000  | -2.68733400 | -3.13923100 |
| H               | 2.89974400  | -1.35287500 | -2.37083600 | H                 | 2.75759700  | -1.45184300 | -2.39819300 |
| H               | 3.46712500  | -3.01094700 | -2.52201400 | H                 | 3.33033900  | -3.11505800 | -2.51636400 |
| H               | 1.58974700  | -3.82651000 | -1.06878900 | H                 | 1.55049100  | -3.87332500 | -0.91268800 |
| H               | 2.55215300  | -2.64123800 | -0.19887200 | H                 | 2.55567500  | -2.64760800 | -0.15589900 |
| <b>TS-2C_2D</b> |             |             |             | <b>S-TS-2C_2D</b> |             |             |             |
| Pd              | 0.18061900  | -1.50383100 | -0.54311500 | Pd                | 0.17429800  | -1.49640800 | -0.55821700 |
| P               | -1.91864300 | -0.33202600 | -0.40452600 | P                 | -1.92108400 | -0.31811900 | -0.41177100 |
| P               | 1.64966000  | 0.12774300  | 0.59497100  | P                 | 1.64160100  | 0.11564100  | 0.61440500  |
| C               | 1.59598300  | 0.15384200  | 2.49831800  | C                 | 1.58841400  | 0.14708600  | 2.51806000  |
| C               | -3.27569200 | -0.90055800 | -1.63214400 | C                 | -3.26114000 | -0.87386700 | -1.66319100 |
| C               | -2.70702800 | -0.69714900 | 1.23894800  | C                 | -2.71515100 | -0.72410700 | 1.21732800  |
| C               | 3.45293100  | -0.17403700 | 0.25248100  | C                 | 3.44543300  | -0.18847700 | 0.26775000  |
| N               | -3.66433600 | 0.12522400  | 1.66502100  | N                 | -3.69319200 | 0.06409400  | 1.66823400  |
| N               | 3.87976700  | -1.39559800 | 0.58629800  | N                 | 3.88975200  | -1.39735000 | 0.62888500  |

|    |             |             |             |    |             |             |             |
|----|-------------|-------------|-------------|----|-------------|-------------|-------------|
| C  | 4.29757200  | 0.79312800  | -0.28719900 | C  | 4.27452600  | 0.76398200  | -0.32113900 |
| C  | 5.16745100  | -1.68802400 | 0.40939000  | C  | 5.17319700  | -1.69145500 | 0.41994500  |
| C  | 5.63621700  | 0.47420200  | -0.47135100 | C  | 5.60843300  | 0.44465100  | -0.53505800 |
| H  | 6.31975500  | 1.20774200  | -0.88375000 | H  | 6.27617600  | 1.16989100  | -0.98743400 |
| C  | 6.08532200  | -0.78790300 | -0.11411900 | C  | 6.07207800  | -0.80667900 | -0.15826900 |
| H  | 7.12248100  | -1.07411800 | -0.23836700 | H  | 7.10552600  | -1.09643700 | -0.30769000 |
| H  | 3.92215500  | 1.77332700  | -0.54795200 | H  | 3.89396900  | 1.73725400  | -0.60003500 |
| H  | 5.47383100  | -2.68860600 | 0.69910100  | H  | 5.49388300  | -2.68246900 | 0.72866000  |
| C  | -2.34116400 | -1.85058000 | 1.92958400  | C  | -2.30992400 | -1.87887500 | 1.88249300  |
| C  | -4.28911700 | -0.17388700 | 2.80227300  | C  | -4.29320800 | -0.27450600 | 2.80959400  |
| C  | -3.00484100 | -2.15862700 | 3.10910300  | C  | -2.94866800 | -2.22607100 | 3.06494200  |
| H  | -2.74809900 | -3.05210600 | 3.66670200  | H  | -2.65674900 | -3.12050300 | 3.60429300  |
| C  | -3.99884200 | -1.30353900 | 3.55825500  | C  | -3.95962600 | -1.40645900 | 3.54222800  |
| H  | -4.54168700 | -1.50226800 | 4.47432800  | H  | -4.48314800 | -1.63280600 | 4.46379800  |
| H  | -1.55745000 | -2.49380900 | 1.54620500  | H  | -1.51122500 | -2.48913400 | 1.47549800  |
| H  | -5.06057600 | 0.52168800  | 3.11835900  | H  | -5.08077600 | 0.39062000  | 3.15229300  |
| C  | 0.28110100  | 0.77753600  | 2.96478100  | C  | 0.28750500  | 0.79777200  | 2.98296500  |
| H  | 0.22309500  | 0.69204200  | 4.05390400  | H  | 0.20626800  | 0.66764500  | 4.06710900  |
| H  | 0.19646300  | 1.83226900  | 2.70863800  | H  | 0.25476500  | 1.86619800  | 2.77423200  |
| H  | -0.57959900 | 0.25196400  | 2.55006400  | H  | -0.58473000 | 0.32632300  | 2.52852400  |
| C  | 2.78724400  | 0.91987500  | 3.07708800  | C  | 2.78909200  | 0.89197000  | 3.10181800  |
| H  | 2.68267200  | 0.96026800  | 4.16548100  | H  | 2.67796000  | 0.92908200  | 4.19072100  |
| H  | 3.73409000  | 0.42607200  | 2.85701000  | H  | 3.73135300  | 0.38579500  | 2.88480200  |
| H  | 2.84784500  | 1.94646800  | 2.71365700  | H  | 2.86051600  | 1.91962800  | 2.74188800  |
| C  | 1.64512500  | -1.30550000 | 2.96544800  | C  | 1.60588300  | -1.31090600 | 2.98849900  |
| H  | 2.54716200  | -1.81425600 | 2.62562000  | H  | 2.51022600  | -1.83291000 | 2.67417800  |
| H  | 1.63011500  | -1.32451200 | 4.05929700  | H  | 1.56802800  | -1.32215700 | 4.08278400  |
| H  | 0.77804200  | -1.86729200 | 2.60991900  | H  | 0.74012000  | -1.86486600 | 2.61745900  |
| C  | -3.74737600 | -2.29209500 | -1.20058000 | C  | -3.72941500 | -2.27260000 | -1.25329800 |
| H  | -4.41976300 | -2.68387900 | -1.96863500 | H  | -4.36955700 | -2.66919200 | -2.04741600 |
| H  | -2.92951500 | -3.00562200 | -1.09543700 | H  | -2.90534800 | -2.97410400 | -1.11651900 |
| H  | -4.30222300 | -2.26125400 | -0.26244600 | H  | -4.31692400 | -2.25063900 | -0.33370700 |
| C  | -2.69260700 | -0.97521800 | -3.04547200 | C  | -2.65776800 | -0.92450900 | -3.06825400 |
| H  | -3.47553400 | -1.31634200 | -3.72870000 | H  | -3.42844000 | -1.26859400 | -3.76552400 |
| H  | -2.34964400 | -0.00759500 | -3.41185400 | H  | -2.31942800 | 0.05279700  | -3.41467300 |
| H  | -1.86514600 | -1.68126800 | -3.11943900 | H  | -1.81799800 | -1.61755600 | -3.13641900 |
| C  | -4.46464600 | 0.06360500  | -1.60026100 | C  | -4.46222500 | 0.07308700  | -1.64493400 |
| H  | -5.26529100 | -0.35671800 | -2.21639800 | H  | -5.23938400 | -0.34541200 | -2.29324400 |
| H  | -4.85176500 | 0.20245900  | -0.59011600 | H  | -4.88390600 | 0.17919700  | -0.64377300 |
| H  | -4.21481400 | 1.04415400  | -2.00431300 | H  | -4.21583900 | 1.06594900  | -2.02232200 |
| Fe | -0.28768800 | 2.75868900  | -0.58962400 | Fe | -0.29457500 | 2.76211700  | -0.55843400 |
| C  | 1.38090200  | 2.03667100  | -1.48136500 | C  | 1.33572000  | 1.98769400  | -1.48450400 |
| C  | 1.28493400  | 4.08134200  | -0.43743700 | C  | 1.30595300  | 4.05623200  | -0.48278500 |
| C  | 1.29797600  | 3.43561700  | -1.70187100 | C  | 1.26847400  | 3.38283400  | -1.73369400 |
| C  | -1.87483400 | 2.24538900  | -1.74338700 | C  | -1.93378000 | 2.30890900  | -1.67038800 |
| C  | -2.00163200 | 3.73707000  | -0.00108300 | C  | -1.96947300 | 3.73835900  | 0.13102000  |
| C  | -1.94955300 | 3.62399700  | -1.41437000 | C  | -1.97485900 | 3.67638500  | -1.28790100 |
| H  | 1.40145000  | 1.27294400  | -2.24441000 | H  | 1.31897200  | 1.20504500  | -2.22898400 |
| H  | 1.18937300  | 5.14284000  | -0.26718000 | H  | 1.23160700  | 5.12355300  | -0.33230200 |
| H  | 1.21890100  | 3.91938000  | -2.66327900 | H  | 1.16460500  | 3.84672900  | -2.70373000 |
| H  | -1.79859600 | 1.85263600  | -2.74359700 | H  | -1.90337200 | 1.94950800  | -2.68619900 |
| H  | -2.03558900 | 4.65649800  | 0.56292200  | H  | -1.96623700 | 4.63716300  | 0.73041000  |
| H  | -1.93388300 | 4.44070900  | -2.11958300 | H  | -1.97370300 | 4.51905400  | -1.96384400 |
| C  | 1.37417900  | 3.08870800  | 0.57225900  | C  | 1.41139300  | 3.08325800  | 0.54584900  |
| C  | 1.43751600  | 1.80741200  | -0.06325700 | C  | 1.43364700  | 1.78967400  | -0.06458900 |

|           |             |             |             |             |             |             |             |
|-----------|-------------|-------------|-------------|-------------|-------------|-------------|-------------|
| C         | -1.96600700 | 2.43178600  | 0.55032800  | C           | -1.92882000 | 2.41108700  | 0.63163500  |
| C         | -1.90346100 | 1.48938800  | -0.52563100 | C           | -1.92401800 | 1.50881900  | -0.48116300 |
| H         | 1.37740000  | 3.28445600  | 1.63144400  | H           | 1.45361000  | 3.29655600  | 1.60174600  |
| H         | -2.00898700 | 2.19058700  | 1.59779000  | H           | -1.91420700 | 2.13100500  | 1.67089900  |
| C         | 1.75806100  | -3.12350000 | -1.03794000 | C           | 1.76458600  | -3.06395500 | -1.05715900 |
| C         | -0.24140300 | -3.09020700 | -1.47500400 | C           | -0.25274700 | -3.05301600 | -1.51971600 |
| O         | -0.69188600 | -3.95826500 | -2.07313400 | O           | -0.67981200 | -3.92314200 | -2.13530000 |
| C         | 2.43292000  | -2.94505100 | -2.37742800 | C           | 2.47280400  | -2.78061700 | -2.35840900 |
| H         | 1.85156000  | -3.35594600 | -3.20481000 | H           | 1.90575000  | -3.12175500 | -3.22805500 |
| H         | 2.64179800  | -1.89664300 | -2.59449600 | H           | 2.68369700  | -1.71759000 | -2.48914300 |
| H         | 3.39315800  | -3.47203600 | -2.36615100 | H           | 3.43290000  | -3.31103700 | -2.36881000 |
| H         | 1.55213500  | -4.16183600 | -0.78465600 | H           | 1.55583600  | -4.12010500 | -0.89435900 |
| H         | 2.32456600  | -2.69124400 | -0.21234100 | H           | 2.30339300  | -2.70108400 | -0.18281800 |
| <b>2D</b> |             |             |             | <b>S-2D</b> |             |             |             |
| Pd        | -0.20979400 | 1.42213300  | 0.10283000  | Pd          | -0.29136300 | 1.40594000  | 0.09528800  |
| P         | 1.82057400  | 0.31430100  | -0.18556600 | P           | 1.79737000  | 0.41108000  | -0.16765900 |
| P         | -1.66664700 | -0.48895300 | 0.83159600  | P           | -1.61973800 | -0.58224600 | 0.81354100  |
| C         | -2.45423900 | -0.84119300 | 2.52638200  | C           | -2.35040500 | -0.98814200 | 2.51946500  |
| C         | 3.44305800  | 1.07871900  | -0.82875400 | C           | 3.39809900  | 1.25444100  | -0.76944000 |
| C         | 2.30967200  | -0.50654800 | 1.40446900  | C           | 2.29605500  | -0.39401300 | 1.42631000  |
| C         | -2.91574200 | 0.56026900  | -0.05278100 | C           | -2.93540500 | 0.39818700  | -0.04540500 |
| N         | 2.80919400  | -1.74159300 | 1.36513900  | N           | 2.79820700  | -1.62981900 | 1.40581200  |
| N         | -2.35826300 | 1.77666500  | -0.24646700 | N           | -2.44426100 | 1.64499800  | -0.22641200 |
| C         | -4.20644600 | 0.28182900  | -0.47568100 | C           | -4.21548000 | 0.05677900  | -0.44857600 |
| C         | -3.06270200 | 2.74100000  | -0.83869600 | C           | -3.21026400 | 2.58565500  | -0.77957700 |
| C         | -4.94227200 | 1.28975300  | -1.08951500 | C           | -5.01367100 | 1.03758900  | -1.02724100 |
| H         | -5.95532100 | 1.09954400  | -1.42504500 | H           | -6.02182300 | 0.80006900  | -1.34777600 |
| C         | -4.36641700 | 2.53832700  | -1.26668200 | C           | -4.50957900 | 2.31930200  | -1.18483000 |
| H         | -4.90908200 | 3.34622500  | -1.74117100 | H           | -5.10516600 | 3.10849800  | -1.62710300 |
| H         | -4.62898800 | -0.70361100 | -0.33097700 | H           | -4.58337800 | -0.95195500 | -0.31508900 |
| H         | -2.56272600 | 3.69065600  | -0.98534200 | H           | -2.76950900 | 3.56718800  | -0.90579800 |
| C         | 2.18583000  | 0.21819300  | 2.58888200  | C           | 2.16619100  | 0.34758200  | 2.59928400  |
| C         | 3.20577500  | -2.29412600 | 2.51057400  | C           | 3.18632800  | -2.16689100 | 2.56348800  |
| C         | 2.62322900  | -0.35850700 | 3.77320000  | C           | 2.59786400  | -0.21274000 | 3.79324400  |
| H         | 2.55287500  | 0.18476900  | 4.70878100  | H           | 2.51853100  | 0.34423200  | 4.72032700  |
| C         | 3.14359400  | -1.64313300 | 3.73645000  | C           | 3.11661700  | -1.49854000 | 3.77839400  |
| H         | 3.49405200  | -2.13570700 | 4.63526500  | H           | 3.45782500  | -1.98125000 | 4.68668100  |
| H         | 1.74797400  | 1.20925200  | 2.57818900  | H           | 1.72930100  | 1.33880500  | 2.57825500  |
| H         | 3.60131800  | -3.30307000 | 2.44078300  | H           | 3.57881700  | -3.17863100 | 2.51343100  |
| C         | -1.41410800 | -1.58793100 | 3.36626000  | C           | -1.23141500 | -1.59084000 | 3.37082200  |
| H         | -1.79420900 | -1.69636700 | 4.38623200  | H           | -1.60299900 | -1.72994000 | 4.39115400  |
| H         | -1.22577100 | -2.59185000 | 2.98354100  | H           | -0.91391900 | -2.56790300 | 3.00285800  |
| H         | -0.46573900 | -1.04884900 | 3.41886300  | H           | -0.35888200 | -0.93600400 | 3.41780100  |
| C         | -3.72742600 | -1.67593900 | 2.41371200  | C           | -3.51938500 | -1.96397900 | 2.42624000  |
| H         | -4.08242100 | -1.92680100 | 3.41825900  | H           | -3.86112300 | -2.20355300 | 3.43914100  |
| H         | -4.53227200 | -1.13099200 | 1.91799000  | H           | -4.36884400 | -1.54152300 | 1.88677300  |
| H         | -3.55604300 | -2.61292200 | 1.88023800  | H           | -3.23108500 | -2.90079800 | 1.94381400  |
| C         | -2.74941700 | 0.51729500  | 3.16679200  | C           | -2.79785900 | 0.33903100  | 3.13463900  |
| H         | -3.51336400 | 1.07388300  | 2.61995000  | H           | -3.63180900 | 0.78689900  | 2.58961800  |
| H         | -3.12113200 | 0.36162400  | 4.18351300  | H           | -3.13088700 | 0.15717000  | 4.16120600  |
| H         | -1.85270800 | 1.13872300  | 3.23320200  | H           | -1.98135500 | 1.06590100  | 3.17377300  |
| C         | 3.80163400  | 2.28002800  | 0.04650000  | C           | 3.67938300  | 2.46948100  | 0.11305800  |
| H         | 4.75075700  | 2.69807500  | -0.30024500 | H           | 4.61901700  | 2.92672500  | -0.21287200 |
| H         | 3.05468600  | 3.07182900  | -0.01991200 | H           | 2.89896700  | 3.22674100  | 0.03088200  |

|              |             |             |             |                |             |             |             |
|--------------|-------------|-------------|-------------|----------------|-------------|-------------|-------------|
| H            | 3.93222000  | 2.00644300  | 1.09621300  | H              | 3.79405100  | 2.20041800  | 1.16576700  |
| C            | 3.22385700  | 1.52456800  | -2.27712200 | C              | 3.19517500  | 1.69390300  | -2.22021300 |
| H            | 4.12682200  | 2.03763300  | -2.62105900 | H              | 4.07672500  | 2.26084400  | -2.53667200 |
| H            | 3.05782800  | 0.67349800  | -2.93871800 | H              | 3.09258600  | 0.83981100  | -2.89220800 |
| H            | 2.38765400  | 2.21571100  | -2.38497900 | H              | 2.32253600  | 2.33718400  | -2.34067000 |
| C            | 4.57140700  | 0.04698800  | -0.77559500 | C              | 4.57402800  | 0.28107100  | -0.68991300 |
| H            | 5.46625400  | 0.49202700  | -1.22132800 | H              | 5.45602200  | 0.77269200  | -1.11420600 |
| H            | 4.81981200  | -0.24641100 | 0.24477700  | H              | 4.81253100  | 0.00460800  | 0.33850400  |
| H            | 4.33370700  | -0.85291300 | -1.34432100 | H              | 4.39708800  | -0.63047700 | -1.26402100 |
| Fe           | -0.10339000 | -2.35532400 | -1.49958400 | Fe             | 0.04680000  | -2.34864900 | -1.53667700 |
| C            | -2.14966300 | -2.37676000 | -1.34956600 | C              | -1.99789700 | -2.46414300 | -1.38788700 |
| C            | -0.79584300 | -4.13115400 | -0.73283300 | C              | -0.56365200 | -4.16372100 | -0.79230300 |
| C            | -1.67734800 | -3.65740700 | -1.73911400 | C              | -1.46468900 | -3.71652300 | -1.79547700 |
| C            | 0.55826000  | -0.71151900 | -2.52679000 | C              | 0.60689800  | -0.64698900 | -2.52553200 |
| C            | 1.43026600  | -2.82079200 | -2.78801900 | C              | 1.60027700  | -2.69559000 | -2.83965400 |
| C            | 0.57669800  | -1.84782400 | -3.37392700 | C              | 0.68710100  | -1.76106800 | -3.40005800 |
| H            | -2.81501700 | -1.75129800 | -1.92310000 | H              | -2.69631900 | -1.86335200 | -1.94993200 |
| H            | -0.25520700 | -5.06486600 | -0.74990900 | H              | 0.01963800  | -5.07255500 | -0.81903900 |
| H            | -1.92729100 | -4.16768100 | -2.65661500 | H              | -1.68878200 | -4.22403700 | -2.72250600 |
| H            | 0.00871400  | 0.20277400  | -2.69261700 | H              | -0.00344600 | 0.23344400  | -2.66268200 |
| H            | 1.62420500  | -3.80928500 | -3.17604700 | H              | 1.84976800  | -3.66394900 | -3.24920100 |
| H            | 0.01491200  | -1.96189500 | -4.28824900 | H              | 0.12577500  | -1.88817000 | -4.31422700 |
| C            | -0.70506500 | -3.14206900 | 0.28013500  | C              | -0.52485200 | -3.18578800 | 0.23650700  |
| C            | -1.56594600 | -2.05233100 | -0.08420500 | C              | -1.43248400 | -2.13254400 | -0.11700400 |
| C            | 1.95190200  | -2.29137400 | -1.57993000 | C              | 2.09569400  | -2.16132600 | -1.62118200 |
| C            | 1.42151800  | -0.97325700 | -1.40857700 | C              | 1.48881000  | -0.88108200 | -1.41624900 |
| H            | -0.07587100 | -3.19699000 | 1.15348500  | H              | 0.09136400  | -3.22751400 | 1.12063300  |
| H            | 2.60444600  | -2.78589500 | -0.88048000 | H              | 2.78610100  | -2.63835700 | -0.94600200 |
| C            | 0.46827500  | 4.24428700  | 0.52256300  | C              | 0.20803800  | 4.26393800  | 0.47161700  |
| C            | 0.35663300  | 3.21827200  | -0.59904800 | C              | 0.16928200  | 3.21551600  | -0.62162700 |
| O            | 0.41344700  | 3.48120000  | -1.76178600 | O              | 0.22979000  | 3.47538300  | -1.79772800 |
| C            | 0.78246100  | 5.65474200  | 0.04167000  | C              | 0.36814200  | 5.69069500  | -0.03119200 |
| H            | 1.73629600  | 5.68877400  | -0.48633000 | H              | 1.29935200  | 5.81424700  | -0.58856000 |
| H            | 0.01579400  | 6.02123800  | -0.64174800 | H              | -0.45811200 | 5.97709900  | -0.68556600 |
| H            | 0.83764600  | 6.33529700  | 0.89316400  | H              | 0.38533400  | 6.38180600  | 0.81491300  |
| H            | 1.22019700  | 3.87857200  | 1.22772200  | H              | 1.01402900  | 3.98383400  | 1.15634800  |
| H            | -0.47794100 | 4.21140700  | 1.07565900  | H              | -0.71409100 | 4.14606000  | 1.05214900  |
| <b>2D-CO</b> |             |             |             | <b>S-2D-CO</b> |             |             |             |
| Pd           | 0.04606200  | 1.54464000  | 0.28512600  | Pd             | 0.03585700  | 1.54117300  | 0.32016800  |
| P            | 1.90829600  | 0.09027100  | -0.30283100 | P              | 1.91330600  | 0.11767200  | -0.30673800 |
| P            | -1.73677500 | -0.24881700 | 0.71443500  | P              | -1.72811100 | -0.26898200 | 0.71489100  |
| C            | -2.35992500 | -0.44487600 | 2.51300600  | C              | -2.36759400 | -0.47396400 | 2.50785200  |
| C            | 3.60904500  | 0.64003100  | -1.00851400 | C              | 3.60693600  | 0.70268400  | -0.99630400 |
| C            | 2.40922700  | -0.75802200 | 1.26959100  | C              | 2.41407100  | -0.76472200 | 1.24531900  |
| C            | -3.20816100 | 0.37706400  | -0.24288400 | C              | -3.18977100 | 0.33103300  | -0.27382800 |
| N            | 2.82383000  | -2.02297500 | 1.21136100  | N              | 2.91864700  | -1.99748500 | 1.16449000  |
| H            | 2.76216500  | 4.80999500  | -1.90847300 | H              | 2.67934300  | 4.88467600  | -1.80785800 |
| N            | -3.04615200 | 1.59780300  | -0.76037000 | N              | -3.01849700 | 1.53435500  | -0.83017300 |
| C            | 0.83241900  | 3.93331300  | -1.41593800 | C              | 0.77340800  | 3.93201400  | -1.36842700 |
| C            | 1.72514800  | 5.11634000  | -1.76394100 | C              | 1.62420800  | 5.14681900  | -1.70359500 |
| H            | 1.70956200  | 5.86553900  | -0.97205700 | H              | 1.54085800  | 5.91333200  | -0.93031200 |
| C            | -4.39403400 | -0.33949700 | -0.40297900 | C              | -4.37674400 | -0.38537400 | -0.41934900 |
| C            | -4.04902000 | 2.14305100  | -1.44629900 | C              | -4.01658800 | 2.06444400  | -1.53633000 |
| C            | -5.43555900 | 0.23727200  | -1.11669900 | C              | -5.41221100 | 0.17509900  | -1.15457500 |

|    |             |             |             |    |             |             |             |
|----|-------------|-------------|-------------|----|-------------|-------------|-------------|
| H  | -6.36832500 | -0.29881100 | -1.25039500 | H  | -6.34555400 | -0.36318300 | -1.27781100 |
| C  | -5.26327000 | 1.50389500  | -1.65311400 | C  | -5.23319700 | 1.42544200  | -1.72615600 |
| H  | -6.04925300 | 1.99015900  | -2.21783900 | H  | -6.01492600 | 1.89903000  | -2.30830000 |
| H  | -4.50270800 | -1.33061300 | 0.01453300  | H  | -4.49549900 | -1.36451100 | 0.02294100  |
| H  | -3.87151900 | 3.13692200  | -1.84583100 | H  | -3.83181900 | 3.04373500  | -1.96833300 |
| C  | 2.41774700  | -0.01149700 | 2.44704200  | C  | 2.31139100  | -0.06665400 | 2.44603100  |
| C  | 3.25353700  | -2.59240600 | 2.33720000  | C  | 3.32405300  | -2.58027100 | 2.29339300  |
| C  | 2.88195300  | -0.61084600 | 3.60970000  | C  | 2.75231100  | -0.67802400 | 3.61167600  |
| H  | 2.91188200  | -0.05457900 | 4.53966400  | H  | 2.68959400  | -0.15822600 | 4.56128000  |
| C  | 3.30594900  | -1.93000200 | 3.55725200  | C  | 3.26537900  | -1.96364300 | 3.53671000  |
| H  | 3.67479600  | -2.43905800 | 4.43939200  | H  | 3.61573800  | -2.48462400 | 4.42007000  |
| H  | 2.08018400  | 1.01894100  | 2.44623400  | H  | 1.89570500  | 0.93444100  | 2.46098300  |
| H  | 3.57998300  | -3.62470100 | 2.25431800  | H  | 3.72025200  | -3.58712200 | 2.19664200  |
| C  | 1.19692500  | 3.23934700  | -0.11945700 | C  | 1.12995300  | 3.25638300  | -0.06704900 |
| O  | 1.97584100  | 3.64533000  | 0.68228100  | O  | 1.88135300  | 3.71240000  | 0.74966900  |
| H  | 0.80390600  | 3.18136600  | -2.20927600 | H  | 0.79096700  | 3.17768900  | -2.15938900 |
| C  | -1.15935200 | -0.84615600 | 3.37379500  | C  | -1.15218100 | -0.74614800 | 3.39544800  |
| H  | -1.46009700 | -0.84044800 | 4.42559600  | H  | -1.48190400 | -0.78936300 | 4.43868800  |
| H  | -0.80534900 | -1.85160100 | 3.14461500  | H  | -0.67160500 | -1.69824100 | 3.16497900  |
| H  | -0.32632500 | -0.14938500 | 3.26155900  | H  | -0.40982400 | 0.04990700  | 3.31314200  |
| C  | -3.45791000 | -1.49986000 | 2.64293300  | C  | -3.37085200 | -1.61696000 | 2.64509600  |
| H  | -3.66931300 | -1.65660400 | 3.70512700  | H  | -3.60667900 | -1.74287800 | 3.70720900  |
| H  | -4.39101700 | -1.18097600 | 2.17769200  | H  | -4.30925400 | -1.40910400 | 2.12924300  |
| H  | -3.16128100 | -2.46171900 | 2.22107300  | H  | -2.97232300 | -2.56565200 | 2.28027700  |
| C  | -2.88200100 | 0.91080500  | 2.99078600  | C  | -3.01289700 | 0.83965800  | 2.94929200  |
| H  | -3.68944000 | 1.29592700  | 2.36468100  | H  | -3.83491700 | 1.14751700  | 2.29917100  |
| H  | -3.27811200 | 0.79959300  | 4.00419400  | H  | -3.42025900 | 0.70338600  | 3.95620800  |
| H  | -2.08718500 | 1.65662200  | 3.03940800  | H  | -2.28441300 | 1.65030900  | 3.00599800  |
| C  | 4.38733400  | 1.42446000  | 0.05013800  | C  | 4.36084400  | 1.47855200  | 0.08421500  |
| H  | 5.30956100  | 1.79559000  | -0.40643600 | H  | 5.27967100  | 1.87830300  | -0.35700800 |
| H  | 3.84206200  | 2.28431100  | 0.43628600  | H  | 3.78944200  | 2.31860900  | 0.47801800  |
| H  | 4.67520200  | 0.79071900  | 0.89030300  | H  | 4.65034600  | 0.83518800  | 0.91765200  |
| C  | 3.36806600  | 1.49806500  | -2.24975700 | C  | 3.36537300  | 1.58226200  | -2.22101800 |
| H  | 4.32859900  | 1.69276400  | -2.73540000 | H  | 4.32775500  | 1.78264900  | -2.70294600 |
| H  | 2.73019400  | 0.99572200  | -2.98084300 | H  | 2.72360600  | 1.09493200  | -2.95940800 |
| H  | 2.93078500  | 2.46412200  | -2.00404000 | H  | 2.92840100  | 2.54392200  | -1.95894400 |
| C  | 4.42143600  | -0.59485500 | -1.40765200 | C  | 4.44643200  | -0.50589600 | -1.41412700 |
| H  | 5.42244300  | -0.26008700 | -1.69612800 | H  | 5.44014000  | -0.14179500 | -1.69566600 |
| H  | 4.53285400  | -1.30487100 | -0.58727300 | H  | 4.57221400  | -1.22765200 | -0.60583200 |
| H  | 3.98804000  | -1.11482300 | -2.26141300 | H  | 4.02603900  | -1.01910600 | -2.27939500 |
| Fe | -0.19904800 | -2.45630800 | -1.35853300 | Fe | -0.15392800 | -2.44206700 | -1.37085300 |
| C  | -2.20387400 | -2.56181000 | -1.02716600 | C  | -2.14934800 | -2.61504400 | -1.00172300 |
| C  | -0.69343500 | -4.08493700 | -0.20069100 | C  | -0.56800000 | -4.07191000 | -0.18130600 |
| C  | -1.68261100 | -3.87103100 | -1.19489800 | C  | -1.58063900 | -3.90660500 | -1.16360600 |
| C  | 0.33765000  | -0.84960000 | -2.48568700 | C  | 0.31594600  | -0.79586600 | -2.47760100 |
| C  | 1.09508500  | -2.98491300 | -2.86960700 | C  | 1.09497500  | -2.90992900 | -2.93765100 |
| C  | 0.19641300  | -1.98307700 | -3.32516400 | C  | 0.16304500  | -1.91310900 | -3.33767600 |
| H  | -2.94621300 | -2.10073000 | -1.65705700 | H  | -2.92264000 | -2.19215000 | -1.62239300 |
| H  | -0.09131500 | -4.97251500 | -0.08235300 | H  | 0.06923200  | -4.93580400 | -0.06096500 |
| H  | -1.96880100 | -4.56672500 | -1.96853100 | H  | -1.85323400 | -4.62214900 | -1.92550200 |
| H  | -0.22298600 | 0.07062400  | -2.56001500 | H  | -0.25974300 | 0.11775900  | -2.51019700 |
| H  | 1.19719400  | -3.97808800 | -3.27999400 | H  | 1.20164800  | -3.89225800 | -3.37500000 |
| H  | -0.49931300 | -2.07881800 | -4.14451600 | H  | -0.56007200 | -2.00142100 | -4.13535800 |
| C  | -0.59173900 | -2.90843700 | 0.58432800  | C  | -0.50095400 | -2.88207100 | 0.58893300  |
| C  | -1.54180800 | -1.95199400 | 0.09053400  | C  | -1.49041900 | -1.96879500 | 0.09607600  |



|                                       |                                       |
|---------------------------------------|---------------------------------------|
| C 1.80157700 -2.47917100 -1.74902800  | C 1.83118500 -2.41516700 -1.82962500  |
| C 1.33968300 -1.14571400 -1.49843800  | C 1.35451500 -1.09602200 -1.53229000  |
| H 0.11206600 -2.75658600 1.38514300   | H 0.19612800 -2.69382500 1.38896500   |
| H 2.52386500 -3.00408200 -1.14743100  | H 2.59007800 -2.94492000 -1.27891200  |
| H -0.20985700 4.25146400 -1.29585700  | H -0.28291900 4.21089000 -1.27055000  |
| H 1.37808800 5.58262300 -2.68749000   | H 1.28866400 5.57983000 -2.64869600   |
| C -1.23727200 2.93930000 0.85215900   | C -1.28482200 2.88627700 0.88652000   |
| O -1.89715600 3.78246100 1.21529100   | O -1.97527500 3.71163200 1.23574900   |
| <b>2D-CH<sub>3</sub>OH</b>            | <b>S-2D-CH<sub>3</sub>OH</b>          |
| Pd 0.10876100 1.48897200 -0.00921900  | Pd 0.06112100 1.50285900 0.09205300   |
| P 1.98191000 0.09222200 -0.15842000   | P 1.99211700 0.20882500 -0.09699900   |
| P -1.73849300 -0.26913000 0.58112600  | P -1.70637200 -0.38436100 0.59648200  |
| C -2.22592100 -0.54544000 2.41522700  | C -2.24719900 -0.86577000 2.37540200  |
| C 3.74096000 0.61118200 -0.73761800   | C 3.74567000 0.84791100 -0.54671300   |
| C 2.32585700 -0.53457800 1.55520400   | C 2.29009400 -0.54706600 1.57232700   |
| C -3.38952200 0.25196800 -0.13354500  | C -3.34748300 0.13522500 -0.13173200  |
| N 2.54646700 -1.83391500 1.74363200   | N 2.58270100 -1.84427600 1.66655200   |
| H 2.60637500 4.62199200 -2.51483900   | H 1.97976700 4.98280500 -2.50523800   |
| N -3.55230400 1.57082900 -0.31158500  | N -3.53975400 1.45913400 -0.21238400  |
| C 0.79867300 3.50828800 -2.03714000   | C 0.54344200 3.41223500 -2.06306800   |
| C 1.52386000 4.76017100 -2.51413700   | C 0.90300800 4.80638100 -2.55409600   |
| H 1.30053100 5.61308400 -1.87274500   | H 0.40613200 5.57679500 -1.96032000   |
| C -4.42026100 -0.64112500 -0.41960700 | C -4.34753100 -0.75853000 -0.50703000 |
| C -4.71348000 2.03540600 -0.77564300  | C -4.70358500 1.93251400 -0.66148800  |
| C -5.62855200 -0.15476200 -0.89867100 | C -5.55818300 -0.26430900 -0.97243000 |
| H -6.44030900 -0.83777800 -1.12206600 | H -6.34752600 -0.94796300 -1.26490400 |
| C -5.78217800 1.21041600 -1.08567800  | C -5.74362900 1.10725800 -1.05551900  |
| H -6.70657700 1.63108000 -1.46105500  | H -6.67200400 1.53379700 -1.41544400  |
| H -4.27738400 -1.70256500 -0.27335800 | H -4.18783200 -1.82553700 -0.43659400 |
| H -4.78212200 3.11082100 -0.90335600  | H -4.79634800 3.01289600 -0.70463700  |
| C 2.40429600 0.40243900 2.58679800    | C 2.25651600 0.30042200 2.67944500    |
| C 2.85658200 -2.24515000 2.97367400   | C 2.85044600 -2.34002200 2.87633500   |
| C 2.74840000 -0.03488700 3.85705000   | C 2.56305300 -0.22120200 3.92733000   |
| H 2.83097200 0.67054500 4.67608900    | H 2.55531600 0.41651200 4.80446600    |
| C 2.97857000 -1.38806300 4.05879000   | C 2.86435500 -1.57112300 4.03174600   |
| H 3.24779600 -1.77539800 5.03390100   | H 3.10218000 -2.02542900 4.98648900   |
| H 2.20369500 1.44993400 2.39329100    | H 1.99099200 1.34473900 2.56367400    |
| H 3.02557000 -3.31154700 3.09022600   | H 3.07298200 -3.40250500 2.91883200   |
| C 1.13992900 3.10673200 -0.61495700   | C 0.93722900 3.14490800 -0.62648200   |
| O 1.75981700 3.76876000 0.15873800    | O 1.52958900 3.92428900 0.07071900    |
| O -1.44918400 3.09770500 0.13655500   | O -1.53755000 3.05432300 0.34977500   |
| H -2.32078500 2.60693100 0.01277500   | H -2.37786000 2.50270600 0.20851500   |
| C -1.52708800 4.10033000 1.14697200   | C -1.60450500 3.82866100 1.54444500   |
| H -1.90121700 3.69731300 2.09181100   | H -1.68228700 3.20203200 2.43687200   |
| H -0.52761300 4.50117200 1.30598700   | H -0.69586800 4.42690800 1.61317400   |
| H -2.18355200 4.91051900 0.81822500   | H -2.46636900 4.50147100 1.50268000   |
| H 0.98591000 2.65016800 -2.68716200   | H 1.01479900 2.63613800 -2.67293000   |
| C -0.95814800 -0.87685400 3.20251900  | C -0.98193900 -1.04967600 3.21163600  |
| H -1.21016600 -0.94823500 4.26472200  | H -1.26854200 -1.30984800 4.23597200  |
| H -0.51428200 -1.82821900 2.91139900  | H -0.33815500 -1.84710100 2.83722000  |
| H -0.20377700 -0.09807000 3.08933900  | H -0.40046000 -0.12762100 3.25119200  |
| C -3.26709300 -1.64610800 2.60097900  | C -3.10418900 -2.12692100 2.42002600  |
| H -3.45665200 -1.77512000 3.67115500  | H -3.36902200 -2.32859000 3.46368800  |
| H -4.22061100 -1.39214300 2.13558900  | H -4.03721800 -2.01070500 1.86542600  |

|                |             |             |                  |             |             |
|----------------|-------------|-------------|------------------|-------------|-------------|
| H -2.93206500  | -2.60670000 | 2.20730800  | H -2.57981400    | -3.00334300 | 2.03693400  |
| C -2.77755600  | 0.78602900  | 2.93152200  | C -3.04102700    | 0.30981000  | 2.94830300  |
| H -3.70710100  | 1.07361000  | 2.43822300  | H -4.00315600    | 0.44569400  | 2.45096000  |
| H -2.98748200  | 0.69173200  | 4.00079500  | H -3.24076500    | 0.11103200  | 4.00623500  |
| H -2.05324400  | 1.59444300  | 2.80887900  | H -2.48522300    | 1.24852000  | 2.89095800  |
| C 4.35421900   | 1.61630500  | 0.23948700  | C 4.22504300     | 1.85383900  | 0.50099700  |
| H 5.30607800   | 1.95962000  | -0.17636500 | H 5.17973200     | 2.26993400  | 0.16286800  |
| H 3.72856700   | 2.49386600  | 0.39766200  | H 3.53099400     | 2.68376400  | 0.63568200  |
| H 4.57124300   | 1.16148900  | 1.20671500  | H 4.40065300     | 1.38314500  | 1.46976900  |
| C 3.63986500   | 1.23094500  | -2.13119700 | C 3.70364400     | 1.51183100  | -1.92220100 |
| H 4.65080800   | 1.40800700  | -2.50931000 | H 4.72933500     | 1.74794600  | -2.22332700 |
| H 3.13674100   | 0.57312600  | -2.84273400 | H 3.27898500     | 0.85901800  | -2.68795000 |
| H 3.13040800   | 2.19357000  | -2.11682700 | H 3.14849100     | 2.44919800  | -1.91072800 |
| C 4.63377900   | -0.63088600 | -0.80326700 | C 4.71966900     | -0.33079200 | -0.58994400 |
| H 5.64992100   | -0.30750600 | -1.04863500 | H 5.72327900     | 0.06534000  | -0.77719100 |
| H 4.68018600   | -1.16283100 | 0.14841900  | H 4.75454400     | -0.88042000 | 0.35258000  |
| H 4.31319400   | -1.33006000 | -1.57518100 | H 4.48603900     | -1.03017500 | -1.39380200 |
| Fe -0.00508900 | -2.55479500 | -1.36322700 | Fe 0.16932500    | -2.42126500 | -1.53056000 |
| C -2.01902800  | -2.30853100 | -1.46504000 | C -1.86004400    | -2.27510200 | -1.61297200 |
| C -1.00109100  | -4.14912200 | -0.54092800 | C -0.73684400    | -4.11637800 | -0.81569300 |
| C -1.68853900  | -3.67196700 | -1.68666800 | C -1.45373300    | -3.60013600 | -1.92787600 |
| C 0.91511900   | -1.13439300 | -2.49191200 | C 1.00135700     | -0.85637200 | -2.53307100 |
| C 1.61235000   | -3.32087600 | -2.37418600 | C 1.80993900     | -3.00667500 | -2.62303800 |
| C 0.92856500   | -2.37295600 | -3.18266300 | C 1.06822600     | -2.02431100 | -3.33515200 |
| H -2.52542200  | -1.66515500 | -2.16675900 | H -2.40495200    | -1.61407700 | -2.26876100 |
| H -0.58799500  | -5.13769900 | -0.41200300 | H -0.27085100    | -5.08896000 | -0.75250500 |
| H -1.89723500  | -4.23312100 | -2.58453000 | H -1.63202100    | -4.10808800 | -2.86451800 |
| H 0.45698300   | -0.21891800 | -2.83446400 | H 0.49471600     | 0.06326800  | -2.78465300 |
| H 1.75509300   | -4.36520300 | -2.60720300 | H 2.00311300     | -4.01777900 | -2.95163300 |
| H 0.46448400   | -2.56820700 | -4.13723900 | H 0.59936900     | -2.15528000 | -4.29955900 |
| C -0.89970100  | -3.08449500 | 0.39283300  | C -0.69463400    | -3.11220300 | 0.18893100  |
| C -1.55670100  | -1.93557200 | -0.15960400 | C -1.41613100    | -1.96844600 | -0.28560200 |
| C 2.03539800   | -2.67535300 | -1.18525000 | C 2.21529600     | -2.44976200 | -1.38244700 |
| C 1.60942700   | -1.30994000 | -1.24594100 | C 1.71817100     | -1.10855700 | -1.31391200 |
| H -0.39673600  | -3.14318300 | 1.34315500  | H -0.20547500    | -3.20580500 | 1.14490500  |
| H 2.55051500   | -3.11968900 | -0.35111900 | H 2.77097800     | -2.94821900 | -0.60644400 |
| H -0.28672600  | 3.65100300  | -2.04115700 | H -0.53199100    | 3.22580200  | -2.13845300 |
| H 1.21189400   | 5.00385700  | -3.53127200 | H 0.58722700     | 4.92365200  | -3.59345400 |
| <b>TS-2D_P</b> |             |             | <b>S-TS-2D_P</b> |             |             |
| Pd -0.30314700 | 1.27923900  | 0.34457300  | Pd -0.27105500   | 1.35096700  | 0.31068600  |
| P 1.90382700   | 0.75410300  | -0.20441000 | P 1.90263900     | 0.69325500  | -0.18534000 |
| P -1.41731100  | -0.88459900 | 0.75663300  | P -1.45651700    | -0.85090300 | 0.73320100  |
| C -1.97351300  | -1.59074700 | 2.45877100  | C -1.97953300    | -1.53391400 | 2.45256700  |
| C 3.27109100   | 1.96935500  | -0.75395500 | C 3.32379000     | 1.86795900  | -0.69504100 |
| C 2.65735600   | -0.00759800 | 1.31868900  | C 2.61029800     | -0.11975800 | 1.33108000  |
| C -3.09523600  | -0.63537700 | -0.04544000 | C -3.13004500    | -0.59061600 | -0.05970400 |
| N 3.43795400   | -1.08359400 | 1.21207700  | N 3.41668700     | -1.17724300 | 1.21025100  |
| H -1.19110200  | 5.41365100  | -1.98315000 | H -0.88594200    | 5.54202300  | -1.91673300 |
| N -3.50802900  | 0.64540900  | -0.16567100 | N -3.53066100    | 0.69156400  | -0.20062000 |
| C -1.01050000  | 3.26315200  | -1.77584100 | C -0.86430900    | 3.37379700  | -1.75583000 |
| C -1.78063300  | 4.51846500  | -2.18377000 | C -1.55020800    | 4.69360700  | -2.09596000 |
| H -2.71961000  | 4.60158800  | -1.63385200 | H -2.45412800    | 4.83530000  | -1.49885500 |
| C -3.96347300  | -1.63151300 | -0.47791200 | C -4.00729400    | -1.58728300 | -0.45908500 |
| C -4.70076000  | 0.99392500  | -0.66698400 | C -4.72268100    | 1.04311900  | -0.69675300 |

|    |             |             |             |    |             |             |             |
|----|-------------|-------------|-------------|----|-------------|-------------|-------------|
| C  | -5.20623100 | -1.30118300 | -1.00172200 | C  | -5.25153200 | -1.25362900 | -0.98009600 |
| H  | -5.87961000 | -2.08484000 | -1.33003500 | H  | -5.93317000 | -2.03882800 | -1.28619200 |
| C  | -5.58639100 | 0.03181400  | -1.09933400 | C  | -5.61831100 | 0.07818900  | -1.10245900 |
| H  | -6.54736900 | 0.32217800  | -1.50274900 | H  | -6.57972400 | 0.37084800  | -1.50328900 |
| H  | -3.65959900 | -2.66523000 | -0.39837000 | H  | -3.72340700 | -2.62482100 | -0.36069100 |
| H  | -4.90350400 | 2.05642900  | -0.70834200 | H  | -4.91928700 | 2.10571300  | -0.75420700 |
| C  | 2.40997400  | 0.61723200  | 2.54258500  | C  | 2.30850600  | 0.45253100  | 2.56645400  |
| C  | 3.99971800  | -1.56698200 | 2.32026300  | C  | 3.94248200  | -1.69731700 | 2.32051000  |
| C  | 3.01728500  | 0.11896500  | 3.68569700  | C  | 2.88090700  | -0.08174100 | 3.71189000  |
| H  | 2.85624700  | 0.59575400  | 4.64614500  | H  | 2.67113100  | 0.35198400  | 4.68358500  |
| C  | 3.83019200  | -0.99972200 | 3.57608700  | C  | 3.71447800  | -1.18323800 | 3.58970600  |
| H  | 4.32448800  | -1.42601200 | 4.44063400  | H  | 4.17900000  | -1.64062800 | 4.45549500  |
| H  | 1.75654600  | 1.48118000  | 2.58588600  | H  | 1.63587600  | 1.30078100  | 2.62141600  |
| H  | 4.62511200  | -2.44581700 | 2.19216900  | H  | 4.58482800  | -2.56320500 | 2.18526700  |
| C  | -0.61741200 | 3.29832900  | -0.31331900 | C  | -0.41232800 | 3.30705800  | -0.30985900 |
| O  | -0.04380600 | 4.18365400  | 0.25654000  | O  | 0.13911700  | 4.21852100  | 0.28254900  |
| O  | -2.04517600 | 2.75224300  | 0.46776500  | O  | -1.95475200 | 2.78474700  | 0.47202500  |
| H  | -2.86549700 | 1.45718100  | 0.12909000  | H  | -2.89046300 | 1.48579400  | 0.08475200  |
| C  | -2.29058700 | 3.40671700  | 1.70614000  | C  | -2.18402000 | 3.37509600  | 1.73573000  |
| H  | -2.55718400 | 2.67868900  | 2.47622000  | H  | -2.45815800 | 2.61992200  | 2.47836100  |
| H  | -1.39805900 | 3.95327600  | 2.01968000  | H  | -1.29003800 | 3.89960800  | 2.09022300  |
| H  | -3.10949500 | 4.12124300  | 1.58070300  | H  | -2.99852000 | 4.10452200  | 1.65363500  |
| H  | -0.08368700 | 3.18913300  | -2.34677200 | H  | 0.03153100  | 3.24853200  | -2.36921800 |
| C  | -0.69840400 | -1.76372500 | 3.29042600  | C  | -0.74097600 | -1.44569200 | 3.34663900  |
| H  | -0.98011200 | -1.99797800 | 4.32125200  | H  | -1.00748300 | -1.78914200 | 4.35155600  |
| H  | -0.08307300 | -2.58800500 | 2.93032900  | H  | 0.07824500  | -2.07338700 | 2.99195700  |
| H  | -0.09031600 | -0.85717300 | 3.30640900  | H  | -0.37950900 | -0.41869000 | 3.42605300  |
| C  | -2.71772900 | -2.91896900 | 2.37364600  | C  | -2.49658900 | -2.96706200 | 2.40772500  |
| H  | -2.87982300 | -3.30455300 | 3.38511100  | H  | -2.74048100 | -3.28218500 | 3.42825700  |
| H  | -3.70312800 | -2.81375300 | 1.91596100  | H  | -3.40772700 | -3.06044100 | 1.81407000  |
| H  | -2.15066900 | -3.67153700 | 1.82248700  | H  | -1.75274500 | -3.66284900 | 2.01565000  |
| C  | -2.84807000 | -0.52044900 | 3.11334200  | C  | -3.05654700 | -0.60244000 | 3.00990800  |
| H  | -3.80093700 | -0.38357800 | 2.59626200  | H  | -4.00575900 | -0.69741600 | 2.47838900  |
| H  | -3.07931100 | -0.82186000 | 4.13886500  | H  | -3.23763100 | -0.86480800 | 4.05708400  |
| H  | -2.33392600 | 0.44279700  | 3.16238300  | H  | -2.74652600 | 0.44540600  | 2.98457500  |
| C  | 3.41200100  | 3.03866700  | 0.33205200  | C  | 3.54595200  | 2.87170700  | 0.43732800  |
| H  | 4.10948600  | 3.80652900  | -0.01565800 | H  | 4.27976100  | 3.61562600  | 0.10994400  |
| H  | 2.45933700  | 3.52699700  | 0.54856500  | H  | 2.62827500  | 3.40212500  | 0.70059700  |
| H  | 3.81774100  | 2.62784400  | 1.25830000  | H  | 3.94094200  | 2.39423800  | 1.33657800  |
| C  | 2.82779800  | 2.62757900  | -2.06084000 | C  | 2.90906000  | 2.61003100  | -1.96448900 |
| H  | 3.62985500  | 3.28048300  | -2.41753900 | H  | 3.74864700  | 3.22708200  | -2.30135600 |
| H  | 2.62531700  | 1.89738000  | -2.84723800 | H  | 2.65407800  | 1.92833600  | -2.77945600 |
| H  | 1.94526000  | 3.25055400  | -1.91344300 | H  | 2.06485100  | 3.27607500  | -1.78604400 |
| C  | 4.60072800  | 1.24751100  | -0.96791200 | C  | 4.61480100  | 1.09506800  | -0.95988200 |
| H  | 5.35850000  | 1.98465400  | -1.25233400 | H  | 5.40428200  | 1.81296500  | -1.20856500 |
| H  | 4.95096300  | 0.74466100  | -0.06565300 | H  | 4.94610300  | 0.52758400  | -0.08873200 |
| H  | 4.54204000  | 0.50927600  | -1.76958900 | H  | 4.51797900  | 0.40827500  | -1.80308100 |
| Fe | 0.75368100  | -2.23478400 | -1.58241300 | Fe | 0.70502600  | -2.24055600 | -1.60514000 |
| C  | -1.18854200 | -2.84819300 | -1.44718700 | C  | -1.25158600 | -2.81368800 | -1.46677800 |
| C  | 0.60456800  | -4.09511000 | -0.72821600 | C  | 0.51833600  | -4.09779300 | -0.75000000 |
| C  | -0.35020300 | -3.95035400 | -1.76732500 | C  | -0.43438500 | -3.93144700 | -1.78997100 |
| C  | 0.95289100  | -0.46794000 | -2.58657800 | C  | 0.90338400  | -0.45818800 | -2.58240100 |
| C  | 2.30747000  | -2.28847600 | -2.92787700 | C  | 2.22933900  | -2.29059200 | -2.98535800 |
| C  | 1.21929600  | -1.54883200 | -3.46427400 | C  | 1.13990600  | -1.52613200 | -3.48538300 |
| H  | -1.98254700 | -2.47136300 | -2.07163600 | H  | -2.04595600 | -2.42281500 | -2.08289200 |

|                                       |             |             |                                         |             |             |
|---------------------------------------|-------------|-------------|-----------------------------------------|-------------|-------------|
| H 1.40209600                          | -4.82097000 | -0.69303600 | H 1.29941200                            | -4.84312500 | -0.71280100 |
| H -0.41199600                         | -4.54773800 | -2.66397000 | H -0.50833200                           | -4.52537800 | -2.68933000 |
| H 0.17704400                          | 0.27312300  | -2.70257000 | H 0.13241800                            | 0.29296100  | -2.67218600 |
| H 2.72594400                          | -3.19184500 | -3.34548000 | H 2.62875300                            | -3.19169900 | -3.42842700 |
| H 0.66989200                          | -1.78668700 | -4.36233000 | H 0.56659800                            | -1.74010900 | -4.37574200 |
| C 0.36919500                          | -3.08068800 | 0.23549500  | C 0.29917000                            | -3.08121400 | 0.21706500  |
| C -0.76949100                         | -2.31340500 | -0.18379500 | C -0.81956700                           | -2.29006700 | -0.20550600 |
| C 2.72691000                          | -1.66112800 | -1.72647000 | C 2.67752000                            | -1.69316000 | -1.77808500 |
| C 1.89236600                          | -0.52324100 | -1.50189000 | C 1.85949600                            | -0.54882300 | -1.51412900 |
| H 0.97251000                          | -2.90579700 | 1.11076000  | H 0.88020500                            | -2.93605100 | 1.11395200  |
| H 3.50102200                          | -1.99101400 | -1.05468700 | H 3.46912600                            | -2.05104800 | -1.14157000 |
| H -1.58686800                         | 2.35960100  | -1.98297800 | H -1.51790600                           | 2.52718400  | -1.96973500 |
| H -2.00825000                         | 4.49002600  | -3.25134300 | H -1.83530700                           | 4.70579200  | -3.15112300 |
| <b>N2A-C<sub>2</sub>H<sub>4</sub></b> |             |             | <b>S-N2A-C<sub>2</sub>H<sub>4</sub></b> |             |             |
| Pd 0.24987800                         | -1.72180500 | -0.33902500 | Pd 0.11569200                           | -1.78872200 | 0.02850500  |
| P -1.86134900                         | -0.56498800 | -0.57084600 | P -1.79366500                           | -0.48700000 | -0.66550500 |
| P 1.59364300                          | -0.07583000 | 0.68281700  | P 1.71491000                            | -0.19678100 | 0.79583900  |
| C 2.14258800                          | -0.42655400 | 2.48951400  | C 2.66842400                            | -0.56297800 | 2.41345400  |
| C -3.24595100                         | -1.24516500 | -1.69892000 | C -2.95065600                           | -1.15754900 | -2.03017300 |
| C -2.73481900                         | -0.34257800 | 1.05463600  | C -2.93488000                           | -0.21364800 | 0.78032600  |
| C 3.26425000                          | -0.09692300 | -0.17276000 | C 3.06028900                            | -0.11306000 | -0.50114100 |
| N -3.41932300                         | 0.77398400  | 1.31215900  | N -3.89723800                           | 0.71390300  | 0.72556200  |
| N 3.43440900                          | -1.19733600 | -0.92765500 | N 2.89310300                            | -1.00989600 | -1.49510000 |
| C 4.32081700                          | 0.80182600  | -0.10322000 | C 4.18505100                            | 0.69286900  | -0.55767300 |
| C 4.55437200                          | -1.49098600 | -1.59966300 | C 3.73203900                            | -1.17099000 | -2.52431400 |
| C 5.49885000                          | 0.53697600  | -0.78983900 | C 5.08288000                            | 0.55801600  | -1.61087500 |
| H 6.32645300                          | 1.23481200  | -0.73083100 | H 5.96265800                            | 1.19006400  | -1.64838400 |
| C 5.62258200                          | -0.62330700 | -1.54872400 | C 4.85886100                            | -0.38292300 | -2.60593400 |
| H 6.52968800                          | -0.85082600 | -2.09270400 | H 5.54226300                            | -0.50848400 | -3.43515100 |
| H 4.21592000                          | 1.69953500  | 0.48933600  | H 4.36927600                            | 1.42185800  | 0.21724700  |
| H 4.55564900                          | -2.41423500 | -2.16431000 | H 3.46834700                            | -1.93080600 | -3.24751100 |
| C -2.66975000                         | -1.40276600 | 1.96008000  | C -2.75511800                           | -1.03294900 | 1.89429500  |
| C -4.05800700                         | 0.86555000  | 2.47807400  | C -4.70048300                           | 0.85011100  | 1.78143300  |
| C -3.35706800                         | -1.30593700 | 3.16109200  | C -3.60318100                           | -0.88877000 | 2.98391000  |
| H -3.33454400                         | -2.12085100 | 3.87600100  | H -3.48448600                           | -1.51663000 | 3.86042700  |
| C -4.06644600                         | -0.14519400 | 3.43058000  | C -4.59828000                           | 0.07496700  | 2.92927800  |
| H -4.61567400                         | -0.02037100 | 4.35590100  | H -5.28363800                           | 0.22919400  | 3.75464400  |
| H -2.08747300                         | -2.28383000 | 1.71569400  | H -1.95471800                           | -1.76561200 | 1.89540100  |
| H -4.59794400                         | 1.79168000  | 2.65301400  | H -5.46670000                           | 1.61689000  | 1.70371600  |
| C 0.85587600                          | -0.62018900 | 3.29786300  | C 1.58935300                            | -0.94090100 | 3.43318200  |
| H 1.11907900                          | -0.94434100 | 4.30905800  | H 2.07112900                            | -1.20897600 | 4.37912200  |
| H 0.28305200                          | 0.30255900  | 3.39382600  | H 0.90682300                            | -0.11135500 | 3.63436800  |
| H 0.21269100                          | -1.38217300 | 2.85366200  | H 0.99972600                            | -1.79819400 | 3.09837700  |
| C 2.97684000                          | 0.69713200  | 3.09648600  | C 3.47000700                            | 0.62344600  | 2.93922300  |
| H 3.17559700                          | 0.46646100  | 4.14767600  | H 3.91630900                            | 0.34743600  | 3.90085400  |
| H 3.94792600                          | 0.80206900  | 2.60817800  | H 4.28818600                            | 0.90369700  | 2.27362500  |
| H 2.46129000                          | 1.65795500  | 3.06043000  | H 2.84253600                            | 1.50118600  | 3.10656600  |
| C 2.92787300                          | -1.73934400 | 2.49128000  | C 3.58546700                            | -1.76067800 | 2.17062600  |
| H 3.89639600                          | -1.64700200 | 1.99330200  | H 4.40781700                            | -1.51811100 | 1.49324900  |
| H 3.12743200                          | -2.03440000 | 3.52524100  | H 4.02388100                            | -2.07254000 | 3.12418600  |
| H 2.36477000                          | -2.54585700 | 2.01657900  | H 3.03993800                            | -2.61369300 | 1.76115400  |
| C -3.67266300                         | -2.61420900 | -1.16789500 | C -3.64509900                           | -2.40358300 | -1.48043600 |
| H -4.41720000                         | -3.04443400 | -1.84422600 | H -4.21505800                           | -2.88340900 | -2.28319600 |
| H -2.83306800                         | -3.30891100 | -1.11264400 | H -2.92758700                           | -3.13398300 | -1.09865000 |

|                                             |             |             |             |                                               |             |             |             |
|---------------------------------------------|-------------|-------------|-------------|-----------------------------------------------|-------------|-------------|-------------|
| H                                           | -4.13170200 | -2.54551700 | -0.17969000 | H                                             | -4.34592500 | -2.15905500 | -0.67826400 |
| C                                           | -2.65165700 | -1.39578500 | -3.10117700 | C                                             | -2.06026600 | -1.54230800 | -3.21347600 |
| H                                           | -3.39285300 | -1.86073100 | -3.75802600 | H                                             | -2.67811200 | -1.98688800 | -4.00121100 |
| H                                           | -2.38626200 | -0.43043400 | -3.53605300 | H                                             | -1.55467800 | -0.67351400 | -3.64288000 |
| H                                           | -1.76192000 | -2.02909600 | -3.09869000 | H                                             | -1.30083300 | -2.27437500 | -2.92739600 |
| C                                           | -4.45005100 | -0.30624100 | -1.74380500 | C                                             | -3.99164900 | -0.13788900 | -2.48393800 |
| H                                           | -5.20872500 | -0.73140600 | -2.40866900 | H                                             | -4.62815300 | -0.59340300 | -3.25122900 |
| H                                           | -4.90602500 | -0.17368100 | -0.76158200 | H                                             | -4.63260800 | 0.18312000  | -1.66137800 |
| H                                           | -4.18564600 | 0.67865800  | -2.13108100 | H                                             | -3.52812900 | 0.74857900  | -2.92249000 |
| Fe                                          | -0.22483500 | 2.48967300  | -0.60928100 | Fe                                            | -0.10928300 | 2.46493700  | -0.30205300 |
| C                                           | 1.74785800  | 2.74369400  | -0.18649600 | C                                             | 1.76630300  | 2.76876200  | 0.44899800  |
| C                                           | 0.04826200  | 3.67291900  | 1.05256500  | C                                             | -0.16789900 | 3.30802800  | 1.57727300  |
| C                                           | 1.04458900  | 3.94912600  | 0.08177400  | C                                             | 0.91679600  | 3.84252800  | 0.83117300  |
| C                                           | -0.54259700 | 1.31522400  | -2.24076800 | C                                             | -0.18651900 | 1.41534100  | -2.04605800 |
| C                                           | -1.60427400 | 3.31971100  | -1.88963500 | C                                             | -1.21149900 | 3.44759800  | -1.73373800 |
| C                                           | -0.57198800 | 2.67983000  | -2.62712000 | C                                             | -0.09441900 | 2.80292900  | -2.33210200 |
| H                                           | 2.53416900  | 2.63530100  | -0.91603500 | H                                             | 2.65890900  | 2.86783200  | -0.14741800 |
| H                                           | -0.67201300 | 4.37501800  | 1.44304400  | H                                             | -0.99507900 | 3.86684700  | 1.99007800  |
| H                                           | 1.22039200  | 4.89935400  | -0.39850800 | H                                             | 1.06095600  | 4.88143200  | 0.57150800  |
| H                                           | 0.14087400  | 0.56105300  | -2.60087800 | H                                             | 0.52669800  | 0.65945700  | -2.33921500 |
| H                                           | -1.85555700 | 4.36877700  | -1.93139500 | H                                             | -1.41480700 | 4.50894500  | -1.74591900 |
| H                                           | 0.09368400  | 3.15420200  | -3.33199100 | H                                             | 0.70060900  | 3.28522000  | -2.88213900 |
| C                                           | 0.12257500  | 2.29598700  | 1.38661800  | C                                             | 0.00154100  | 1.90089700  | 1.65336000  |
| C                                           | 1.19607200  | 1.70594700  | 0.63739100  | C                                             | 1.20905400  | 1.55164300  | 0.96054100  |
| C                                           | -2.22561700 | 2.35309200  | -1.05720100 | C                                             | -2.00087100 | 2.45920400  | -1.08506200 |
| C                                           | -1.57191300 | 1.09815500  | -1.26322200 | C                                             | -1.37151800 | 1.18648900  | -1.27008500 |
| H                                           | -0.54530800 | 1.78431700  | 2.05969000  | H                                             | -0.67644600 | 1.20649700  | 2.12545100  |
| H                                           | -3.01886000 | 2.51794400  | -0.34798900 | H                                             | -2.90487800 | 2.63098000  | -0.52382300 |
| H                                           | 2.59920300  | -1.84067400 | -0.93249500 | H                                             | 2.04875400  | -1.59897100 | -1.42976600 |
| C                                           | -0.06462500 | -3.70012700 | -1.10743700 | C                                             | -0.27734300 | -3.89853500 | -0.35103100 |
| C                                           | 1.30326300  | -3.60354900 | -0.82195200 | C                                             | 0.98669300  | -3.77740300 | 0.23137700  |
| H                                           | 1.99384000  | -3.56822900 | -1.66404200 | H                                             | 1.88150000  | -3.86869400 | -0.37844800 |
| H                                           | -0.72214300 | -4.21925600 | -0.41749500 | H                                             | -1.12560300 | -4.21915900 | 0.24715800  |
| H                                           | -0.40640400 | -3.67433900 | -2.13560200 | H                                             | -0.37432300 | -4.07898600 | -1.41774000 |
| H                                           | 1.70712400  | -4.06970600 | 0.07096600  | H                                             | 1.12678800  | -4.00483300 | 1.28448900  |
| <b>TS-N2A-C<sub>2</sub>H<sub>4</sub>_2B</b> |             |             |             | <b>S-TS-N2A-C<sub>2</sub>H<sub>4</sub>_2B</b> |             |             |             |
| Pd                                          | 0.28336300  | -1.66625600 | -0.37381200 | Pd                                            | 0.27234900  | -1.65976100 | -0.39202300 |
| P                                           | -1.83796400 | -0.60495400 | -0.53091900 | P                                             | -1.83706400 | -0.59983300 | -0.53404200 |
| P                                           | 1.57703800  | 0.01765700  | 0.71633700  | P                                             | 1.58041900  | 0.00667900  | 0.71932100  |
| C                                           | 2.05009100  | -0.28912800 | 2.54290100  | C                                             | 2.01592600  | -0.31235600 | 2.55058600  |
| C                                           | -3.22533500 | -1.32882800 | -1.62345800 | C                                             | -3.23550700 | -1.31727200 | -1.61927300 |
| C                                           | -2.66521600 | -0.40395800 | 1.11868100  | C                                             | -2.65330600 | -0.40065900 | 1.12103000  |
| C                                           | 3.22762300  | -0.16836900 | -0.13437100 | C                                             | 3.23077200  | -0.17494100 | -0.12503700 |
| N                                           | -3.31963600 | 0.72291200  | 1.40198600  | N                                             | -3.29805400 | 0.72866500  | 1.42463300  |
| N                                           | 3.34415500  | -1.33302000 | -0.78177900 | N                                             | 3.33543600  | -1.32241400 | -0.80294800 |
| C                                           | 4.29329000  | 0.72391200  | -0.10365400 | C                                             | 4.30042200  | 0.70973400  | -0.06487100 |
| C                                           | 4.47526800  | -1.67136700 | -1.39829200 | C                                             | 4.46325600  | -1.65057800 | -1.42970500 |
| C                                           | 5.47548400  | 0.38904800  | -0.75230300 | C                                             | 5.47979100  | 0.38318200  | -0.72304800 |
| H                                           | 6.31513900  | 1.07458300  | -0.73970400 | H                                             | 6.32449800  | 1.06223200  | -0.68984400 |
| C                                           | 5.57423200  | -0.82888600 | -1.41035500 | C                                             | 5.56774400  | -0.81473800 | -1.41728500 |
| H                                           | 6.48024900  | -1.12234200 | -1.92512500 | H                                             | 6.47097300  | -1.09982000 | -1.94253100 |
| H                                           | 4.19995200  | 1.66681000  | 0.41786300  | H                                             | 4.21898400  | 1.63732500  | 0.48541300  |
| H                                           | 4.48800500  | -2.63551500 | -1.89457600 | H                                             | 4.46772500  | -2.59962700 | -1.95457400 |
| C                                           | -2.60930400 | -1.48113500 | 2.00334200  | C                                             | -2.58703900 | -1.48392500 | 1.99683100  |

|    |             |             |             |    |             |             |             |
|----|-------------|-------------|-------------|----|-------------|-------------|-------------|
| C  | -3.94049100 | 0.80953000  | 2.57785000  | C  | -3.89149800 | 0.81097800  | 2.61667300  |
| C  | -3.27802300 | -1.38834900 | 3.21535500  | C  | -3.22786100 | -1.39469200 | 3.22398100  |
| H  | -3.26308400 | -2.21481400 | 3.91693000  | H  | -3.19879500 | -2.22597900 | 3.92003100  |
| C  | -3.95804100 | -0.21716200 | 3.51310900  | C  | -3.89237100 | -0.22065200 | 3.54542500  |
| H  | -4.49168300 | -0.09617800 | 4.44795600  | H  | -4.40006700 | -0.09935900 | 4.49520500  |
| H  | -2.05021600 | -2.37137500 | 1.73949700  | H  | -2.03825900 | -2.37617300 | 1.71924900  |
| H  | -4.45703800 | 1.74425300  | 2.77526400  | H  | -4.39719300 | 1.74757000  | 2.83503900  |
| C  | 0.75134900  | -0.39398000 | 3.34581400  | C  | 0.70529400  | -0.54145300 | 3.30503600  |
| H  | 0.99322100  | -0.68174700 | 4.37304900  | H  | 0.93657000  | -0.77514200 | 4.34947600  |
| H  | 0.21410800  | 0.55332800  | 3.39550800  | H  | 0.05554000  | 0.33527000  | 3.30216600  |
| H  | 0.08205600  | -1.15017900 | 2.93219900  | H  | 0.14973700  | -1.38326900 | 2.88693000  |
| C  | 2.93238700  | 0.81897900  | 3.11150100  | C  | 2.79581300  | 0.83954400  | 3.17662300  |
| H  | 3.12490900  | 0.61451400  | 4.16920900  | H  | 3.01512700  | 0.59062500  | 4.22059900  |
| H  | 3.90322600  | 0.86821100  | 2.61487000  | H  | 3.75043300  | 1.01287100  | 2.67540200  |
| H  | 2.45666300  | 1.79872500  | 3.04474300  | H  | 2.22780400  | 1.77186700  | 3.17073600  |
| C  | 2.77720500  | -1.63528900 | 2.60538600  | C  | 2.84133300  | -1.59984700 | 2.60266300  |
| H  | 3.74640100  | -1.60912700 | 2.10359400  | H  | 3.82846600  | -1.47929500 | 2.15152400  |
| H  | 2.95966700  | -1.89225900 | 3.65266900  | H  | 2.98872000  | -1.87957700 | 3.65062000  |
| H  | 2.18103600  | -2.43960700 | 2.16665400  | H  | 2.33205800  | -2.43122800 | 2.10710700  |
| C  | -3.58205300 | -2.72250300 | -1.10530300 | C  | -3.57346100 | -2.72173300 | -1.11978800 |
| H  | -4.33341600 | -3.16609200 | -1.76492100 | H  | -4.32940200 | -3.15931100 | -1.78004800 |
| H  | -2.71783800 | -3.38799200 | -1.09244600 | H  | -2.70383500 | -3.38107700 | -1.12581900 |
| H  | -4.01040300 | -2.69045200 | -0.10153700 | H  | -3.98985100 | -2.70923200 | -0.10985800 |
| C  | -2.68605300 | -1.42377300 | -3.05240800 | C  | -2.71699200 | -1.38610800 | -3.05651600 |
| H  | -3.43295800 | -1.91373300 | -3.68370100 | H  | -3.46404100 | -1.88873600 | -3.67944700 |
| H  | -2.48871900 | -0.43896200 | -3.47855600 | H  | -2.55017500 | -0.39226000 | -3.47684800 |
| H  | -1.76772100 | -2.01177600 | -3.10568600 | H  | -1.78534600 | -1.95145300 | -3.13140200 |
| C  | -4.46358600 | -0.43302200 | -1.59842400 | C  | -4.48465200 | -0.43991700 | -1.56578300 |
| H  | -5.22745000 | -0.86853200 | -2.25003400 | H  | -5.24613000 | -0.87019800 | -2.22543800 |
| H  | -4.89150900 | -0.34647200 | -0.59884800 | H  | -4.90971700 | -0.38863900 | -0.56153700 |
| H  | -4.24859400 | 0.57105200  | -1.96624800 | H  | -4.28736100 | 0.57735200  | -1.90980100 |
| Fe | -0.24804700 | 2.49960600  | -0.69112100 | Fe | -0.24919400 | 2.50651300  | -0.68711200 |
| C  | 1.74682500  | 2.73907600  | -0.35691600 | C  | 1.75130500  | 2.72855000  | -0.34910600 |
| C  | 0.11239200  | 3.81631100  | 0.84932700  | C  | 0.12032900  | 3.81310600  | 0.85899300  |
| C  | 1.08084700  | 3.98011600  | -0.17395300 | C  | 1.09016300  | 3.97350300  | -0.16606500 |
| C  | -0.59831200 | 1.26969400  | -2.27348200 | C  | -0.58687200 | 1.26666600  | -2.26757700 |
| C  | -1.71023600 | 3.24939600  | -1.93095000 | C  | -1.69002500 | 3.25726000  | -1.94956800 |
| C  | -0.69021600 | 2.62089700  | -2.69475000 | C  | -0.66344600 | 2.61711800  | -2.69685900 |
| H  | 2.51154400  | 2.54410400  | -1.09136700 | H  | 2.52114800  | 2.52980600  | -1.07825400 |
| H  | -0.57620800 | 4.56938000  | 1.20026700  | H  | -0.56349100 | 4.57013800  | 1.21464100  |
| H  | 1.26343100  | 4.88065400  | -0.73990100 | H  | 1.27809600  | 4.87445500  | -0.73194400 |
| H  | 0.09271100  | 0.52874500  | -2.64630200 | H  | 0.10685900  | 0.51988400  | -2.62560400 |
| H  | -1.99636600 | 4.28857400  | -1.99015500 | H  | -1.96974300 | 4.29887900  | -2.01703400 |
| H  | -0.06906600 | 3.09504800  | -3.43916500 | H  | -0.02690000 | 3.08308200  | -3.43501000 |
| C  | 0.16589400  | 2.47256700  | 1.30115300  | C  | 0.17158400  | 2.46749800  | 1.31003200  |
| C  | 1.20008600  | 1.79369400  | 0.57200100  | C  | 1.19963600  | 1.78655300  | 0.57742900  |
| C  | -2.26334500 | 2.29000700  | -1.04483400 | C  | -2.25979600 | 2.30364300  | -1.06512100 |
| C  | -1.57920600 | 1.04994400  | -1.24683900 | C  | -1.58111600 | 1.05709300  | -1.25251500 |
| H  | -0.48640200 | 2.04306100  | 2.04320400  | H  | -0.46340500 | 2.03891700  | 2.06875700  |
| H  | -3.03215700 | 2.45031400  | -0.30820600 | H  | -3.04224800 | 2.48150600  | -0.34672400 |
| H  | 2.15567100  | -2.12525600 | -0.73367600 | H  | 2.12288100  | -2.15053000 | -0.76265300 |
| C  | 0.02902000  | -3.55635300 | -1.23887100 | C  | 0.03653100  | -3.53987000 | -1.27998000 |
| C  | 1.44159000  | -3.44940500 | -1.02406700 | C  | 1.44852600  | -3.43721400 | -1.04103400 |
| H  | 2.05070400  | -3.44958000 | -1.92749900 | H  | 2.07601400  | -3.44369600 | -1.93300400 |
| H  | -0.55537900 | -4.17291700 | -0.56294000 | H  | -0.55932800 | -4.16377200 | -0.61913300 |

|                                       |                                       |
|---------------------------------------|---------------------------------------|
| H -0.34627600 -3.52617400 -2.25489200 | H -0.31916400 -3.50109100 -2.30424900 |
| H 1.87555600 -4.03205300 -0.21535300  | H 1.86492100 -4.01992200 -0.22217100  |

**Table S5.** Computed Energetic Data for All Optimized Structures

|                                                                                                                                                |                                                                                                                                                                                                       |
|------------------------------------------------------------------------------------------------------------------------------------------------|-------------------------------------------------------------------------------------------------------------------------------------------------------------------------------------------------------|
| <b>CO</b><br>HF= -113.304332<br>ZPE= 0.005076<br>NImag= 0<br>Htot = -113.295951<br>Gtot = -113.318375                                          | <b>S-CO</b><br>HF= -113.29534<br>ZPE= 0.005061<br>NImag= 0<br>Htot = -113.286973<br>Gtot = -113.309397<br><br>HF(empiricaldispersion=gd3bj)= -113.2960501                                             |
| <b>CH<sub>3</sub>OH</b><br>HF= -115.724973<br>ZPE= 0.05124<br>NImag= 0<br>Htot = -115.669466<br>Gtot = -115.696472                             | <b>S-CH<sub>3</sub>OH</b><br>HF= -115.733956<br>ZPE= 0.051124<br>NImag= 0<br>Htot = -115.678545<br>Gtot = -115.7056<br><br>HF(empiricaldispersion=gd3bj)= -115.7370073                                |
| <b>(CH<sub>3</sub>OH)<sub>3</sub></b><br>HF= -347.201075<br>ZPE= 0.159369<br>NImag= 0<br>Htot = -347.02903<br>Gtot = -347.081073               | <b>S-(CH<sub>3</sub>OH)<sub>3</sub></b><br>HF= -347.211996<br>ZPE= 0.157196<br>NImag= 0<br>Htot = -347.041392<br>Gtot = -347.096782                                                                   |
| <b>C<sub>2</sub>H<sub>4</sub></b><br>HF= -78.586425<br>ZPE= 0.050974<br>NImag= 0<br>Htot = -78.531465<br>Gtot = -78.55697                      | <b>S-C<sub>2</sub>H<sub>4</sub></b><br>HF= -78.587419<br>ZPE= 0.050828<br>NImag= 0<br>Htot = -78.532607<br>Gtot = -78.558114<br><br>HF(empiricaldispersion=gd3bj)= -78.5913029                        |
| <b>CH<sub>3</sub>OCOCH<sub>2</sub>CH<sub>3</sub></b><br>HF= -307.696533<br>ZPE= 0.11834<br>NImag= 0<br>Htot = -307.569849<br>Gtot = -307.61028 | <b>S-CH<sub>3</sub>OCOCH<sub>2</sub>CH<sub>3</sub></b><br>HF= -307.705488<br>ZPE= 0.117962<br>NImag= 0<br>Htot = -307.579256<br>Gtot = -307.619487<br><br>HF(empiricaldispersion=gd3bj)= -307.7213122 |
| <b>1A</b><br>HF= -1750.913535<br>ZPE= 0.638122<br>NImag= 0<br>Htot = -1750.239247                                                              | <b>S-1A</b><br>HF= -1750.995839<br>ZPE= 0.637165<br>NImag= 0<br>Htot = -1750.322857                                                                                                                   |

|                                                                                                                               |                                                                                                                                                                                |
|-------------------------------------------------------------------------------------------------------------------------------|--------------------------------------------------------------------------------------------------------------------------------------------------------------------------------|
| Gtot = -1750.338511                                                                                                           | Gtot = -1750.420551<br>HF(empiricaldispersion=gd3bj)= -1751.20763                                                                                                              |
| <b>1B</b><br><br>HF= -1829.537997<br>ZPE= 0.696643<br>NImag= 0<br>Htot = -1828.802673<br>Gtot = -1828.905819                  | <b>S-1B</b><br><br>HF= -1829.615231<br>ZPE= 0.694619<br>NImag= 0<br>Htot = -1828.881876<br>Gtot = -1828.985922<br><br>HF(empiricaldispersion=gd3bj)= -1829.844582              |
| <b>1C</b><br><br>HF= -1942.85383<br>ZPE= 0.706346<br>NImag= 0<br>Htot = -1942.105995<br>Gtot = -1942.215727                   | <b>S-1C</b><br><br>HF= -1942.928593<br>ZPE= 0.704867<br>NImag= 0<br>Htot = -1942.182513<br>Gtot = -1942.291065<br><br>HF(empiricaldispersion=gd3bj)= -1943.167947              |
| <b>TS-1C_1D</b><br><br>HF= -1942.846745<br>ZPE= 0.705066<br>NImag= -257.9799<br>Htot = -1942.100634<br>Gtot = -1942.209744    | <b>S-TS-1C_1D</b><br><br>HF= -1942.923448<br>ZPE= 0.704438<br>NImag= -276.339<br>Htot = -1942.178517<br>Gtot = -1942.285885<br><br>HF(empiricaldispersion=gd3bj)= -1943.162462 |
| <b>1D</b><br><br>HF= -1942.873842<br>ZPE= 0.707165<br>NImag= 0<br>Htot = -1942.125504<br>Gtot = -1942.23523                   | <b>S-1D</b><br><br>HF= -1942.95389<br>ZPE= 0.706024<br>NImag= 0<br>Htot = -1942.207284<br>Gtot = -1942.314547<br><br>HF(empiricaldispersion=gd3bj)= -1943.187352               |
| <b>1D-CO</b><br><br>HF= -2056.188629<br>ZPE= 0.71547<br>NImag= 0<br>Htot = -2055.429357<br>Gtot = -2055.544354                | <b>S-1D-CO</b><br><br>HF= -2056.265852<br>ZPE= 0.714658<br>NImag= 0<br>Htot = -2055.50795<br>Gtot = -2055.620963<br><br>HF(empiricaldispersion=gd3bj)= -2056.51052             |
| <b>1D-CH<sub>3</sub>OH</b><br><br>HF= -2058.600113<br>ZPE= 0.760869<br>NImag= 0<br>Htot = -2057.793678<br>Gtot = -2057.912468 | <b>S-1D-CH<sub>3</sub>OH</b><br><br>HF= -2058.684212<br>ZPE= 0.760004<br>NImag= 0<br>Htot = -2057.879131<br>Gtot = -2057.996415                                                |



|                                                                                                                            |                                                                                                                                                                             |
|----------------------------------------------------------------------------------------------------------------------------|-----------------------------------------------------------------------------------------------------------------------------------------------------------------------------|
|                                                                                                                            | HF(empiricaldispersion=gd3bj)= -2058.936367                                                                                                                                 |
| <b>TS-1D_P</b><br><br>HF= -2058.554972<br>ZPE= 0.757328<br>NImag= -200.9275<br>Htot = -2057.752368<br>Gtot = -2057.872637  | <b>S-TS-1D_P</b><br><br>HF= -2058.637796<br>ZPE=0.75711<br>NImag= -118.594<br>Htot = -2057.836319<br>Gtot = -2057.952647<br><br>HF(empiricaldispersion=gd3bj)= -2058.884264 |
| <b>2A</b><br><br>HF= -2130.260054<br>ZPE= 0.563231<br>NImag= 0<br>Htot = -2129.659883<br>Gtot = -2129.76543                | <b>S-2A</b><br><br>HF= -2130.339641<br>ZPE= 0.561649<br>NImag= 0<br>Htot = -2129.74097<br>Gtot = -2129.847214<br><br>HF(empiricaldispersion=gd3bj)= -2130.553763            |
| <b>N-2A</b><br><br>HF= -2130.262915<br>ZPE= 0.567239<br>NImag= 0<br>Htot = -2129.659207<br>Gtot = -2129.762776             | <b>S-N-2A</b><br><br>HF= -2130.348594<br>ZPE= 0.566356<br>NImag= 0<br>Htot = -2129.745515<br>Gtot = -2129.851519<br><br>HF(empiricaldispersion=gd3bj)= -2130.565485         |
| <b>2B</b><br><br>HF= -2208.885043<br>ZPE= 0.621005<br>NImag= 0<br>Htot = -2208.224669<br>Gtot = -2208.333327               | <b>S-2B</b><br><br>HF= -2208.961541<br>ZPE= 0.619138<br>NImag= 0<br>Htot = -2208.302981<br>Gtot = -2208.411201<br><br>HF(empiricaldispersion=gd3bj)= -2209.200394           |
| <b>2C</b><br><br>HF= -2322.197185<br>ZPE= 0.630552<br>NImag= 0<br>Htot = -2321.5245<br>Gtot = -2321.638464                 | <b>S-2C</b><br><br>HF= -2322.270886<br>ZPE= 0.629535<br>NImag= 0<br>Htot = -2321.599457<br>Gtot = -2321.712412<br><br>HF(empiricaldispersion=gd3bj)= -2322.521399           |
| <b>TS-2C_2D</b><br><br>HF= -2322.189872<br>ZPE= 0.629662<br>NImag= -245.4711<br>Htot = -2321.518556<br>Gtot = -2321.631978 | <b>S-TS-2C_2D</b><br><br>HF= -2322.264303<br>ZPE= 0.628406<br>NImag= -302.9848<br>Htot = -2321.594472<br>Gtot = -2321.706433                                                |

|                                                                                                                                                         |                                                                                                                                                                                                               |
|---------------------------------------------------------------------------------------------------------------------------------------------------------|---------------------------------------------------------------------------------------------------------------------------------------------------------------------------------------------------------------|
|                                                                                                                                                         | HF(empiricaldispersion=gd3bj)= -2322.514233                                                                                                                                                                   |
| <b>2D</b><br><br>HF= -2322.228336<br>ZPE= 0.631796<br>NImag= 0<br>Htot = -2321.554724<br>Gtot = -2321.670231                                            | <b>S-2D</b><br><br>HF= -2322.308537<br>ZPE= 0.630137<br>NImag= 0<br>Htot = -2321.636699<br>Gtot = -2321.750884<br><br>HF(empiricaldispersion=gd3bj)= -2322.553633                                             |
| <b>2D-CO</b><br><br>HF= -2435.539526<br>ZPE= 0.640219<br>NImag= 0<br>Htot = -2434.855047<br>Gtot = -2434.975384                                         | <b>S-2D-CO</b><br><br>HF= -2435.615277<br>ZPE= 0.638533<br>NImag= 0<br>Htot = -2434.932607<br>Gtot = -2435.051504<br><br>HF(empiricaldispersion=gd3bj)= -2435.872701                                          |
| <b>2D-CH<sub>3</sub>OH</b><br><br>HF= -2437.961477<br>ZPE= 0.686778<br>NImag= 0<br>Htot = -2437.229365<br>Gtot = -2437.350969                           | <b>S-2D-CH<sub>3</sub>OH</b><br><br>HF= -2438.038432<br>ZPE= 0.683966<br>NImag= 0<br>Htot = -2437.309068<br>Gtot = -2437.430327<br><br>HF(empiricaldispersion=gd3bj)= -2438.301335                            |
| <b>TS-2D_P</b><br><br>HF= -2437.928708<br>ZPE= 0.685337<br>NImag= -286.6979<br>Htot = -2437.198713<br>Gtot = -2437.319175                               | <b>S-TS-2D_P</b><br><br>HF= -2438.01858<br>ZPE= 0.684537<br>NImag= -272.5647<br>Htot = -2437.289712<br>Gtot = -2437.408366<br><br>HF(empiricaldispersion=gd3bj)= -2438.280008                                 |
| <b>N2A-C<sub>2</sub>H<sub>4</sub></b><br><br>HF= -2208.879327<br>ZPE= 0.622266<br>NImag= 0<br>Htot = -2208.217861<br>Gtot = -2208.325585                | <b>S-N2A-C<sub>2</sub>H<sub>4</sub></b><br><br>HF= -2208.966698<br>ZPE= 0.620384<br>NImag= 0<br>Htot = -2208.306744<br>Gtot = -2208.415826<br><br>HF(empiricaldispersion=gd3bj)= -2209.204806                 |
| <b>TS-N2A-C<sub>2</sub>H<sub>4</sub>_2B</b><br><br>HF= -2208.865755<br>ZPE= 0.616606<br>NImag= -1229.1429<br>Htot = -2208.210368<br>Gtot = -2208.317015 | <b>S-TS-N2A-C<sub>2</sub>H<sub>4</sub>_2B</b><br><br>HF= -2208.940619<br>ZPE= 0.615249<br>NImag= -1292.5934<br>Htot = -2208.286738<br>Gtot = -2208.392276<br><br>HF(empiricaldispersion=gd3bj)= -2209.1808308 |

**Table S6.** Computed geometry and energetic data for the three-methanol cluster at B3LYP/LANL2DZ(Pd)/6-31g(d) level of theory

| Mecking's work <sup>7</sup>                                                                                                                                                                                                                                                                                                                                                                                                                                                                                                                                                                                         | This work                                                                                                                                                                                                                                                                                                                                                                                                                                                                                                                                                                                                           |
|---------------------------------------------------------------------------------------------------------------------------------------------------------------------------------------------------------------------------------------------------------------------------------------------------------------------------------------------------------------------------------------------------------------------------------------------------------------------------------------------------------------------------------------------------------------------------------------------------------------------|---------------------------------------------------------------------------------------------------------------------------------------------------------------------------------------------------------------------------------------------------------------------------------------------------------------------------------------------------------------------------------------------------------------------------------------------------------------------------------------------------------------------------------------------------------------------------------------------------------------------|
| Cartesian coordinates                                                                                                                                                                                                                                                                                                                                                                                                                                                                                                                                                                                               | Cartesian coordinates                                                                                                                                                                                                                                                                                                                                                                                                                                                                                                                                                                                               |
| O 1.554293 0.238264 0.000000<br>H 1.082673 -0.619779 0.000000<br>O -0.573437 -1.465259 0.000000<br>H -1.078382 -0.625989 0.000000<br>O -0.977030 1.224410 0.000000<br>H 0.000000 1.238611 0.000000<br>C 2.954052 0.035606 0.000000<br>C -1.452182 -2.573314 0.000000<br>C -1.508964 2.538171 0.000000<br>H -0.838855 -3.479215 0.000000<br>H -2.095161 -2.594909 0.892928<br>H -2.095161 -2.594909 -0.892928<br>H 3.428725 1.021206 0.000000<br>H 3.295658 -0.509274 0.893004<br>H 3.295658 -0.509274 -0.893004<br>H -0.717337 3.297430 0.000000<br>H -2.132929 2.697003 -0.889910<br>H -2.132929 2.697003 0.889910 | O 0.642949 -1.338737 -0.600143<br>C 1.419624 -2.135314 0.283759<br>H 2.408689 -2.257182 -0.167002<br>H 1.541452 -1.670122 1.273352<br>H 0.979494 -3.132912 0.422038<br>H -0.232648 -1.169840 -0.178158<br>O -1.492087 -0.076750 0.563637<br>C -2.733967 0.078273 -0.113090<br>H -3.277716 0.965274 0.240852<br>H -2.609717 0.155497 -1.202709<br>H -3.338987 -0.805773 0.106591<br>H -0.912700 0.684158 0.323039<br>O 0.554592 1.410447 -0.491960<br>H 0.852919 0.491491 -0.688359<br>C 1.560544 2.060179 0.273123<br>H 2.495861 2.165049 -0.294444<br>H 1.192755 3.061154 0.515066<br>H 1.779756 1.534693 1.214707 |
| 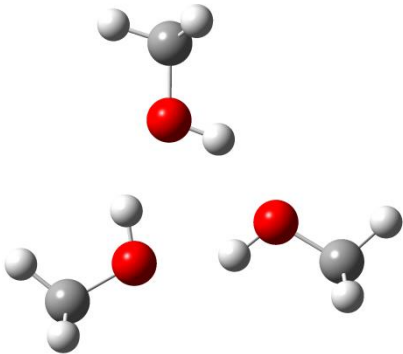                                                                                                                                                                                                                                                                                                                                                                                                                                                                                                                                 |                                                                                                                                                                                                                                                                                                                                                                                                                                                                                                                                 |
| -347.1736537 a.u.<br>$\Delta E = 23.1$ kJ/mol                                                                                                                                                                                                                                                                                                                                                                                                                                                                                                                                                                       | -347.1817391 a.u.<br>$\Delta E = 0.0$ kJ/mol                                                                                                                                                                                                                                                                                                                                                                                                                                                                                                                                                                        |
| -347.049626 a.u.<br>$\Delta G = 25.1$ kJ/mol                                                                                                                                                                                                                                                                                                                                                                                                                                                                                                                                                                        | -347.059231 a.u.<br>$\Delta G = 0.0$ kJ/mol                                                                                                                                                                                                                                                                                                                                                                                                                                                                                                                                                                         |

## 5. Alkoxyacylation of various alkenes with ferrocenyl phosphine ligands

General procedure: Under argon atmosphere, a vial (4 mL) was charged with [Pd(acac)<sub>2</sub>] (1.22 mg, 0.2 mol%), **L2** (8.2 mg, 0.8 mol%), PTSA (12.2 mg, 3.2 mol%) and a stirring bar. Then MeOH (2.0 mL) and the alkene **1** (2.0 mmol) were added. The vial was placed in an alloyed plate, which was then transferred into an autoclave (300 mL) under argon atmosphere. The autoclave was flushed with CO three times at room temperature and then pressurized with CO to 40 bar. The reaction was performed at 120 °C for 20 h. After the reaction finished, the autoclave was cooled to room temperature and the pressure was carefully released. The regioselectivity of the product was measured by GC analysis. The yield of the desired ester **2**<sup>8</sup> was determined by isolated products through column chromatography on silica gel or detected by GC analysis using isooctane as internal standard. Methoxyacylation of **1b** (40 mmol) and **1c** (80 mmol) on large scale was carried out in a 100 mL autoclave following modified procedure.

### methyl 3,5,5-trimethylhexanoate **2b**

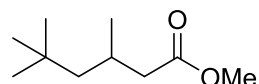

<sup>1</sup>H-NMR (CDCl<sub>3</sub>, 300 MHz): δ = 0.65 (s, 9 H, -CH<sub>3</sub>), 0.72 (d, <sup>2</sup>J (<sup>1</sup>H, <sup>1</sup>H) = 6.523 Hz, 3 H, -CH<sub>3</sub>), 0.92 (m, 2 H, -CH<sub>2</sub>), 1.88 (m, 2 H, -CH<sub>2</sub>), 2.05 (m, 1 H, -CH), 3.40 (s, 3 H, -CH<sub>3</sub>). <sup>13</sup>C-NMR (CDCl<sub>3</sub>, 300 MHz): δ = 22.66 (s, -CH<sub>3</sub>), 26.94 (s, -CH), 29.86 (s, -CH<sub>3</sub>), 31.00 (s, -C<sub>quartär</sub>), 43.77 (s, -CH), 50.48 (s, -CH<sub>2</sub>), 51.21 (s, -CH<sub>3</sub>), 173.48 (s, -C=O).

### methyl cyclooctanecarboxylate **2d**

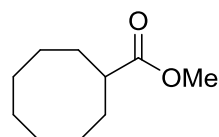

<sup>1</sup>H-NMR (CDCl<sub>3</sub>, 300 MHz): δ = 1.62 (s, 14 H, -CH<sub>2</sub>), 2.50 (m, 1 H, -CH), 3.63 (s, 3 H, -CH<sub>3</sub>). <sup>13</sup>C-NMR (CDCl<sub>3</sub>, 300 MHz): δ = 25.19 (s, -CH<sub>2</sub>), 26.08 (s, -CH<sub>2</sub>), 26.73 (s, -CH<sub>2</sub>), 28.69 (s, -CH<sub>2</sub>), 43.43 (s, -CH), 51.45 (s, -CH<sub>3</sub>), 177.71 (s, -C=O).

### methyl 2,3-dihydro-1H-indene-1-carboxylate **2e**

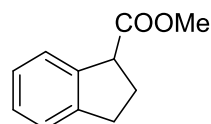

major product

<sup>1</sup>H-NMR (CDCl<sub>3</sub>, 300 MHz): δ = 2.40-3.42 (m, 4 H, aliph. -CH<sub>2</sub>), 3.84 (s, 3 H, -CH<sub>3</sub>), 4.18 (t, <sup>3</sup>J (<sup>1</sup>H, <sup>1</sup>H) = 7.292 Hz), 1 H, -CH), 7.29-7.53 (s, 4H, -CH). <sup>13</sup>C-NMR (CDCl<sub>3</sub>, 300 MHz): major: δ = 28.87 (s, -CH<sub>2</sub>), 31.87 (s, -CH<sub>2</sub>), 50.20 (s, -CH), 52.01 (s, CH<sub>3</sub>), 124.42 (s, -CH<sub>arom.</sub>), 124.77 (s, -CH<sub>arom.</sub>), 126.54 (s, -CH<sub>arom.</sub>), 127.65 (s, -CH<sub>arom.</sub>), 140.82 (s, -CH<sub>arom.</sub>), 144.16 (s, -C<sub>arom.</sub>), 174.34 (s, -C=O). minor: δ = 36.31 (s, -CH<sub>2</sub>), 43.58 (s, -CH), 51.91 (s, CH<sub>3</sub>), 124.88 (s, -CH<sub>arom.</sub>), 126.72 (s, -CH<sub>arom.</sub>), 141.63 (s, -C<sub>arom.</sub>), 175.71 (s, -C=O).

### methyl 4-phenylbutanoate **2i**

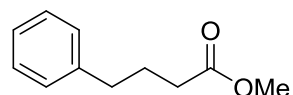

major product

<sup>1</sup>H-NMR (CDCl<sub>3</sub>, 300 MHz): δ = 1.86 (m, 2H, -CH<sub>2</sub>), 2.22 (t, <sup>3</sup>J (<sup>1</sup>H, <sup>1</sup>H) = 7.63 Hz, 2 H, -CH<sub>2</sub>-C<sub>arom.</sub>), 2.54 (t, <sup>3</sup>J (<sup>1</sup>H, <sup>1</sup>H) = 7.32 Hz, 2 H, -CH<sub>2</sub>-C=O), 3.54 (s, 3 H, -CH<sub>3</sub>), 7.05-7.21 (s, 5 H, -CH<sub>arom.</sub>). <sup>13</sup>C-NMR (CDCl<sub>3</sub>, 300 MHz): δ = 26.53 (s, -CH<sub>2</sub>), 33.37 (s, -CH<sub>2</sub>-C=O), 35.15 (s, -CH<sub>2</sub>), 51.47 (s, -CH<sub>3</sub>), 126.0-141.38 (s, -C<sub>arom.</sub>), 173.87 (s, -C=O).

methyl 3-methyldecanoate **2j**

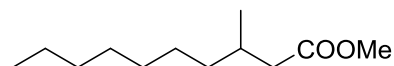

$^1\text{H-NMR}$  ( $\text{CDCl}_3$ , 300 MHz):  $\delta$  = 0.82 (m, 6 H,  $-\text{CH}_3$ ), 1.19 (s, 12 H,  $-\text{CH}_2$ ), 2.01 (m, 2 H,  $-\text{CH}_2$ ), 2.23 (m, 1 H,  $-\text{CH}$ ), 3.59 (s, 3 H,  $-\text{CH}_3$ ).  $^{13}\text{C-NMR}$  ( $\text{CDCl}_3$ , 300 MHz):  $\delta$  = 14.02 (s,  $-\text{CH}_3$ ), 19.68 (s,  $-\text{CH}_3$ ), 22.63 (s,  $-\text{CH}_2$ ), 26.89 (s,  $-\text{CH}_2$ ), 29.26 (s,  $-\text{CH}$ ), 29.68 (s,  $-\text{CH}_2$ ), 30.31 (s,  $-\text{CH}_2$ ), 31.84 (s,  $-\text{CH}_2$ ), 36.71 (s,  $-\text{CH}_2$ ), 41.61 (s,  $-\text{CH}_2$ ), 51.50 (s,  $-\text{CH}_3$ ), 173.68 (s,  $-\text{C}=\text{O}$ ).

methyl 3-phenylbutanoate **2k**

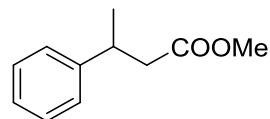

$^1\text{H-NMR}$  ( $\text{CDCl}_3$ , 300 MHz):  $\delta$  = 1.20 (d,  $^2J$  ( $^1\text{H}$ ,  $^1\text{H}$ ) = 6.954 Hz, 3 H,  $-\text{CH}_3$ ), 2.47 (m, 2 H,  $-\text{CH}_2$ ), 3.18 (m, 1 H,  $-\text{CH}$ ), 3.50 (s, 3 H,  $-\text{CH}_3$ ), 7.06-7.21 (m/s, 5 H,  $-\text{CH}_{\text{arom}}$ ).  $^{13}\text{C-NMR}$  ( $\text{CDCl}_3$ , 300 MHz):  $\delta$  = 21.84 (s,  $-\text{CH}_3$ ), 36.50 (s,  $-\text{CH}_2$ ), 42.77 (s,  $-\text{CH}$ ), 51.49 (s,  $-\text{CH}_3$ ), 126.47 (s,  $-\text{CH}_{\text{arom}}$ ), 126.76 (s,  $-\text{CH}_{\text{arom}}$ ), 128.57 (s,  $-\text{CH}_{\text{arom}}$ ), 145.76 (s,  $-\text{C}_{\text{arom}}$ ), 172.82 (s,  $-\text{C}=\text{O}$ ).

methyl 3,3-diphenylpropanoate **2l**

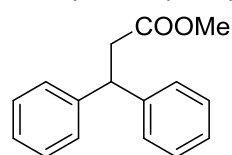

$^1\text{H-NMR}$  ( $\text{CDCl}_3$ , 300 MHz):  $\delta$  = 3.16 (d,  $^2J$  ( $^1\text{H}$ ,  $^1\text{H}$ ) = 7.986 Hz, 2 H,  $-\text{CH}_2$ ), 3.65 (s, 3 H,  $-\text{CH}_3$ ), 4.66 (t,  $^3J$  ( $^1\text{H}$ ,  $^1\text{H}$ ) = 4.659 Hz, 1 H,  $-\text{CH}$ ), 7.24-7.39 (m, 10 H,  $\text{CH}_{\text{arom}}$ ).  $^{13}\text{C-NMR}$  ( $\text{CDCl}_3$ , 300 MHz):  $\delta$  = 40.65 (s,  $-\text{CH}_2$ ), 47.05 (s,  $-\text{CH}$ ), 51.72 (s,  $-\text{CH}_3$ ), 126.62 (s,  $-\text{CH}_{\text{arom}}$ ), 127.72 (s,  $-\text{CH}_{\text{arom}}$ ), 128.64 (s,  $-\text{CH}_{\text{arom}}$ ), 143.55 (s,  $-\text{C}_{\text{arom}}$ ), 172.30 (s,  $-\text{C}=\text{O}$ ).

dimethyl 3,3'-(1,3-phenylene)dibutyrates **2m**

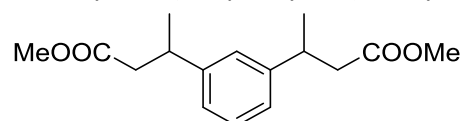

$^1\text{H-NMR}$  ( $\text{CDCl}_3$ , 300 MHz):  $\delta$  = 1.32 (d,  $^2J$  ( $^1\text{H}$ ,  $^1\text{H}$ ) = 6.960 Hz, 6 H,  $-\text{CH}_3$ ), 2.60 (m, 4 H,  $-\text{CH}_2$ ), 3.31 (m, 2 H,  $-\text{CH}$ ), 3.63 (s, 6 H,  $-\text{CH}_3$ ), 7.07-7.27 (s, 4H,  $-\text{CH}$ ).  $^{13}\text{C-NMR}$  ( $\text{CDCl}_3$ , 300 MHz):  $\delta$  = 21.72 (s,  $-\text{CH}_3$ ), 36.47 (s,  $-\text{CH}_2$ ), 42.75 (s,  $-\text{CH}$ ), 51.37 (s,  $-\text{CH}_3$ ), 124.68 (s,  $-\text{CH}_{\text{arom}}$ ), 125.36 (s,  $-\text{CH}_{\text{arom}}$ ), 128.67 (s,  $-\text{CH}_{\text{arom}}$ ), 145.92 (s,  $-\text{C}_{\text{arom}}$ ), 172.66 (s,  $-\text{C}=\text{O}$ ).

methyl 5-cyanopentanoate **2o**

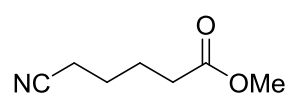

$^1\text{H-NMR}$  ( $\text{CDCl}_3$ , 300 MHz):  $\delta$  = 1.69 (m, 4 H,  $-\text{CH}_2$ ), 2.32 (m, 4 H,  $-\text{CH}_2$ ), 3.61 (s, 3 H,  $-\text{CH}_3$ ).  $^{13}\text{C-NMR}$  ( $\text{CDCl}_3$ , 300 MHz):  $\delta$  = 16.84 (s,  $-\text{CH}_2$ ), 23.80 (s,  $-\text{CH}_2$ ), 24.74 (s,  $-\text{CH}_2$ ), 32.94 (s,  $-\text{CH}_2$ ), 51.55 (s,  $-\text{CH}_3$ ), 119.39 (s,  $-\text{CN}$ ), 173.12 (s,  $-\text{C}=\text{O}$ ).

dimethyl acetylaspartate **2p**

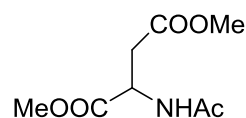

$^1\text{H-NMR}$  ( $\text{CDCl}_3$ , 300 MHz):  $\delta$  = 1.97 (s, 3 H,  $-\text{CH}_3$ ), 2.86 (m, 2 H,  $-\text{CH}_2$ ), 3.62 (s, 3 H,  $-\text{CH}_3$ ), 3.69 (s, 3 H,  $-\text{CH}_3$ ), 4.80 (m, 1 H,  $-\text{CH}$ ), 6.78 (d,  $^2J$  ( $^1\text{H}$ ,  $^1\text{H}$ ) = 7.923 Hz, 1 H,  $-\text{NH}$ ).  $^{13}\text{C-NMR}$  ( $\text{CDCl}_3$ , 300 MHz):  $\delta$  = 22.92 (s,  $-\text{CH}_3$ ), 36.06 (s,  $-\text{CH}_2$ ), 48.48 (s,  $-\text{CH}_3$ ), 51.95 (s,  $-\text{CH}_3$ ), 52.68 (s,  $-\text{CH}$ ), 169.99 (s,  $-\text{C}=\text{O}$ ), 171.24 (s,  $-\text{C}=\text{O}$ ), 171.45 (s,  $-\text{C}=\text{O}$ ).

## 6. References

- (1) Frisch, M. J.; Trucks, G. W.; Schlegel, H. B.; Scuseria, G. E.; Robb, M. A.; Cheeseman, J. R.; Scalmani, G.; Barone, V.; Petersson, G. A.; Nakatsuji, H.; Li, X.; Caricato, M.; Marenich, A.; Bloino, J.; Janesko, B. G.; Gomperts, R.; Mennucci, B.; Hratchian, H. P.; Ortiz, J. V.; Izmaylov, A. F.; Sonnenberg, J. L.; Williams-Young, D.; F. Ding, F. L.; F. Egidi, J. G.; B. Peng, A. P.; Henderson, T.; Ranasinghe, D.; Zakrzewski, V. G.; J. Gao, N. R.; G. Zheng, W. L.; M. Hada, M. E.; Toyota, K.; Fukuda, R.; Hasegawa, J.; Ishida, M.; Nakajima, T.; Honda, Y.; Kitao, O.; Nakai, H.; Vreven, T.; Throssell, K.; Jr., J. A. M.; Peralta, J. E.; Ogliaro, F.; Bearpark, M.; Heyd, J. J.; Brothers, E.; Kudin, K. N.; Staroverov, V. N.; Keith, T.; Kobayashi, R.; Normand, J.; Raghavachari, K.; Rendell, A.; Burant, J. C.; Iyengar, S. S.; Tomasi, J.; Cossi, M.; Millam, J. M.; Klene, M.; Adamo, C.; Cammi, R.; Ochterski, J. W.; R. L. Martin; Morokuma, K.; Farkas, O.; Foresman, J. B.; Fox, D. J. *Gaussian Inc.: Wallingford, CT, USA* **2009**.
- (2) Becke, A. D. *J. Chem. Phys.* **1993**, *98*, 5648-5652.
- (3) Schäfer, A.; Huber, C.; Ahlrichs, R. *J. Chem. Phys.* **1994**, *100*, 5829-5835.
- (4) Hay, P. J.; Wadt, W. R. *J. Chem. Phys.* **1985**, *82*, 299-310.
- (5) Marenich, A. V.; Cramer, C. J.; Truhlar, D. G. *The Journal of Physical Chemistry B* **2009**, *113*, 6378-6396.
- (6) (a) Walther, G.; Knöpke, L. R.; Rabeah, J.; Chęciński, M. P.; Jiao, H.; Bentrup, U.; Brückner, A.; Martin, A.; Köckritz, A. *J. Catal.* **2013**, *297*, 44-55. (b) Crawford, L.; Cole-Hamilton, D. J.; Drent, E.; Bühl, M. *Chem. Eur. J.* **2014**, *20*, 13923-13926.
- (7) (a) Roesle, P.; Dürr, C. J.; Möller, H. M.; Cavallo, L.; Caporaso, L.; Mecking, S. *J. Am. Chem. Soc.* **2012**, *134*, 17696-17703. (b) Roesle, P.; Caporaso, L.; Schnitte, M.; Goldbach, V.; Cavallo, L.; Mecking, S. *J. Am. Chem. Soc.* **2014**, *136*, 16871-16881.
- (8) Dong, K.; Fang, X.; Gülak, S.; Franke, R.; Spannenberg, A.; Neumann, H.; Jackstell, R.; Beller, M. *Nat. Commun.* **2017**, *8*, 14117-14123.

## 7. Spectra of the carbonylation products (Figure S12)

170908.40a.1.fid

Kaiwu Dong / K61178-b

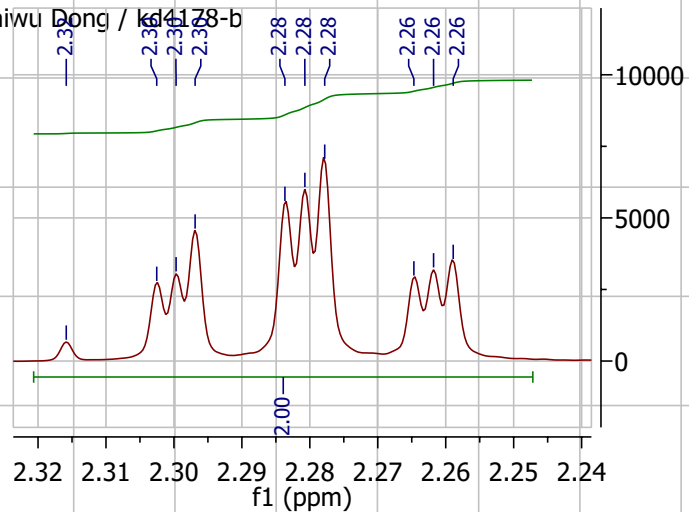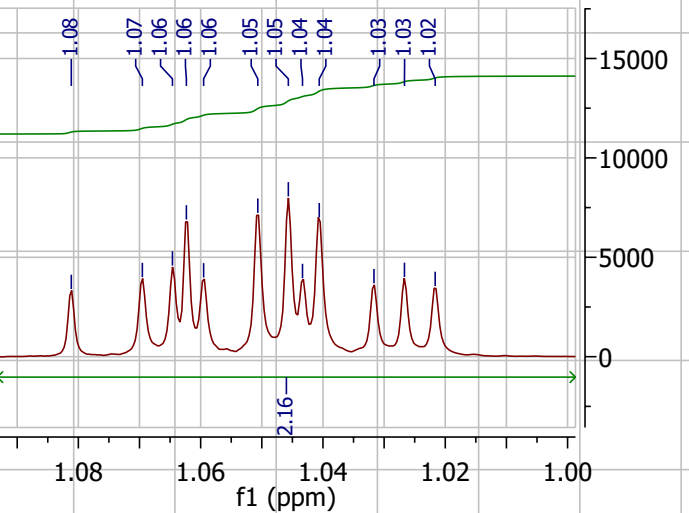

3.61 3.31 2.32 2.30 2.30 2.28 2.28 2.26 2.26 1.08 1.07 1.06 1.06 1.05 1.05 1.04 1.04 1.03 1.02

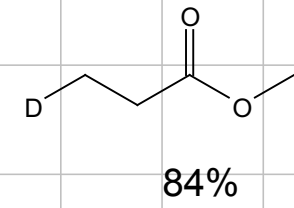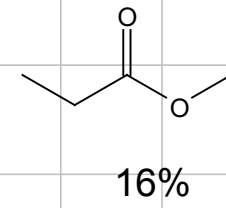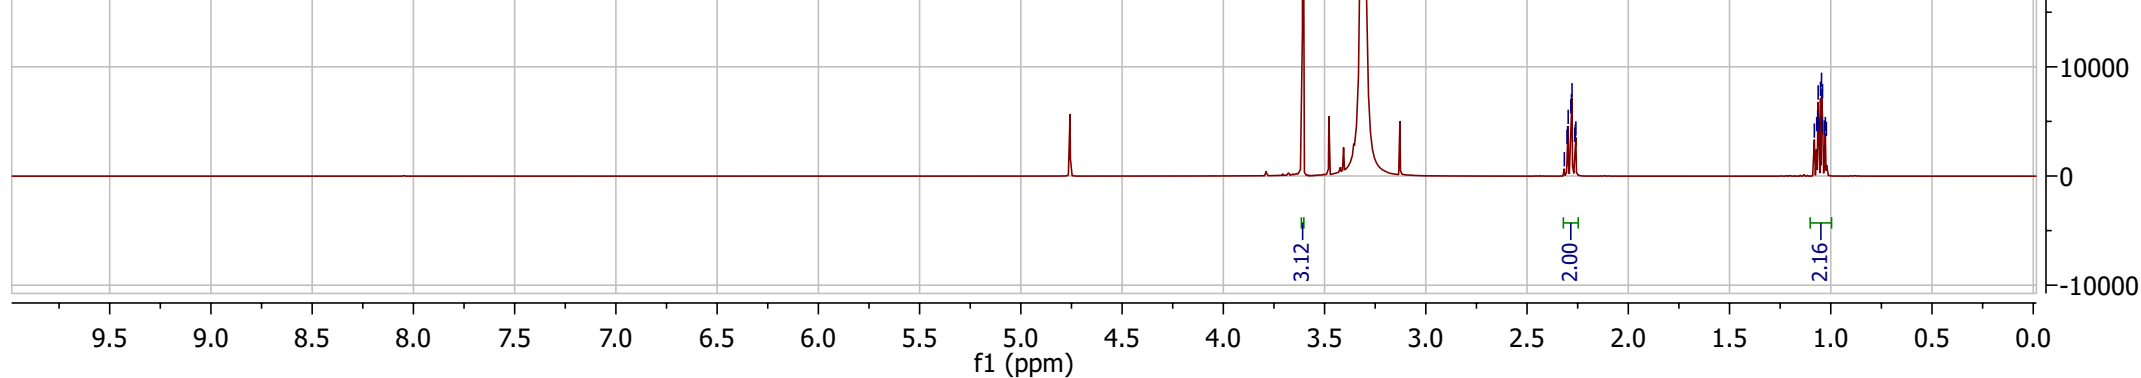

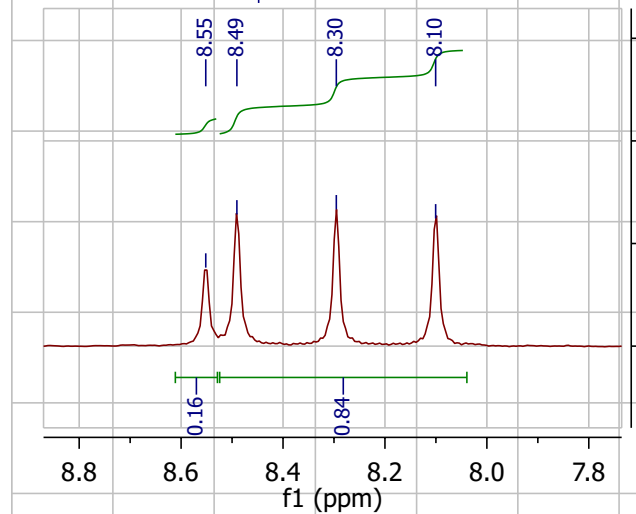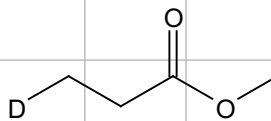

84%

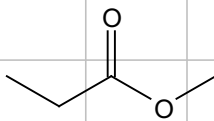

16%

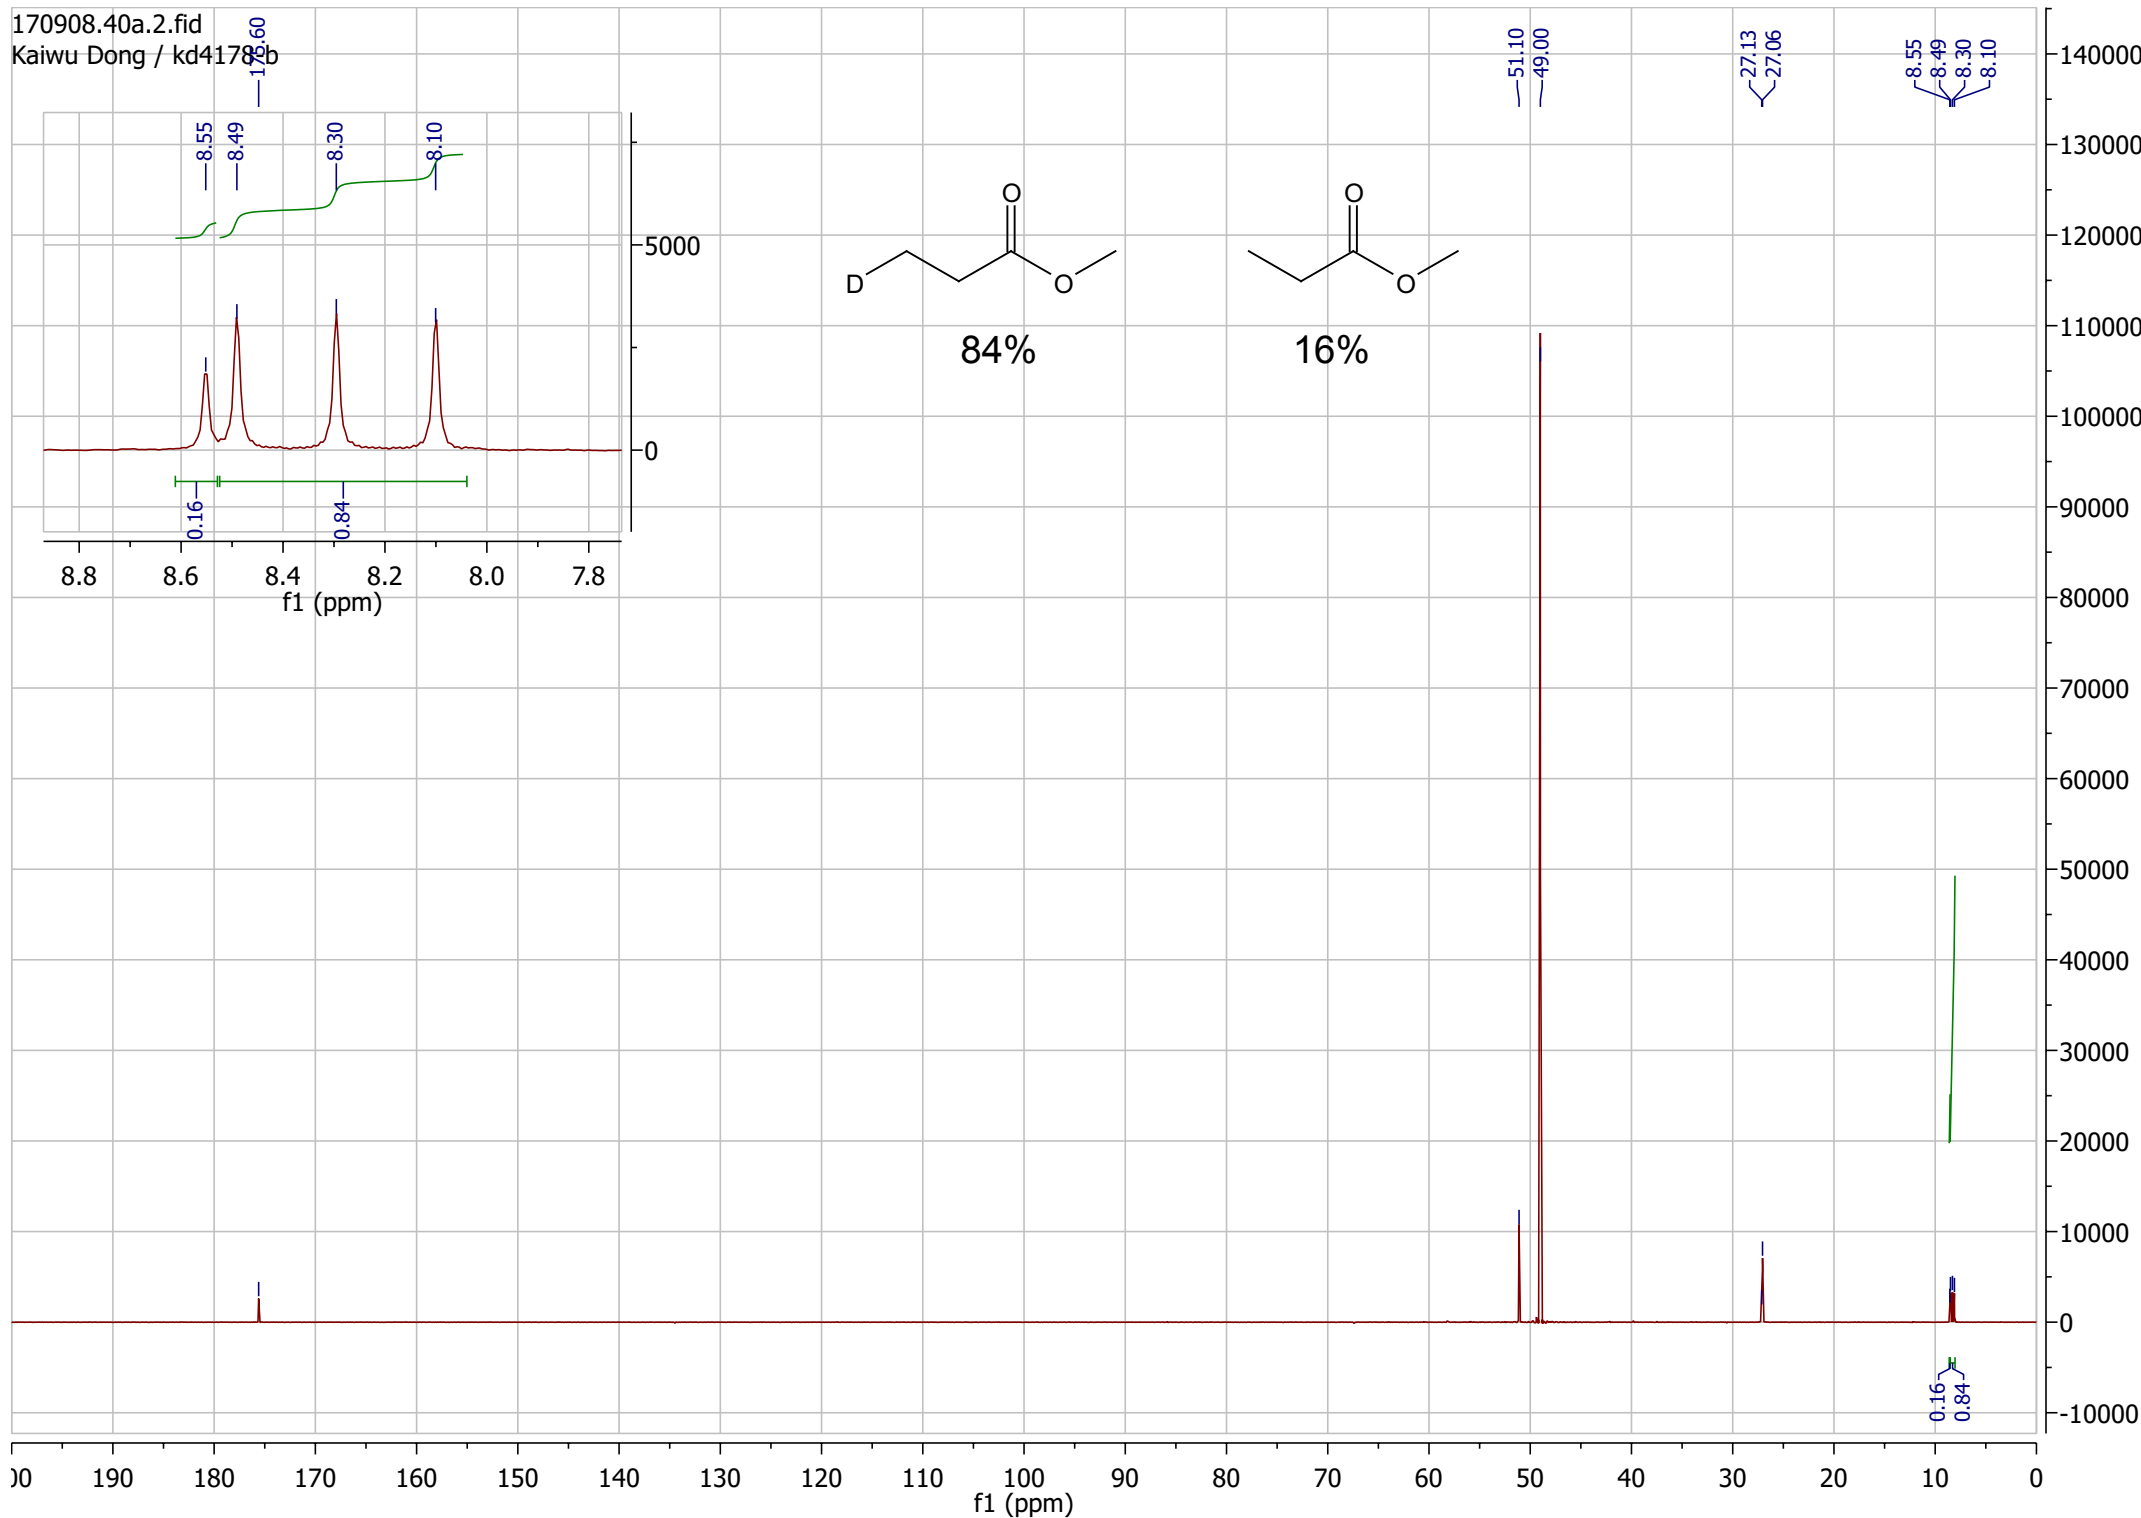



171220.f322.10.fid  
Dong, Kd4194  
PROTON CD3OD\_SPE {C:\Bruker\TopSpin3.5\pl6} 1712 22

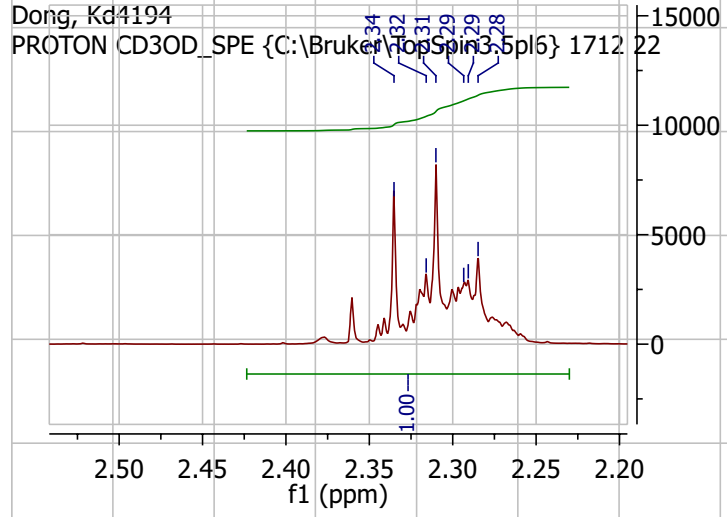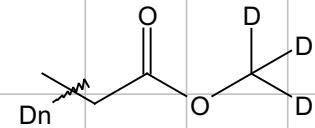

2.34  
2.32  
2.31  
2.29  
2.29  
2.28  
1.12  
1.10  
1.10  
1.09  
1.08  
1.08  
1.08  
1.07  
1.07  
1.07  
1.06  
1.06  
1.06

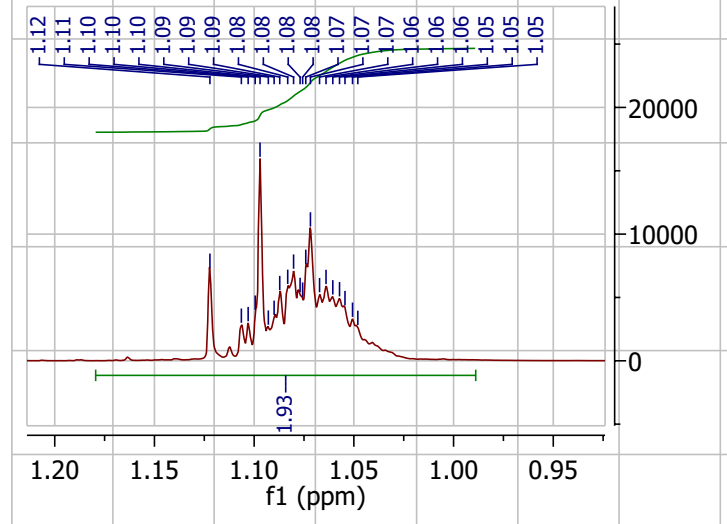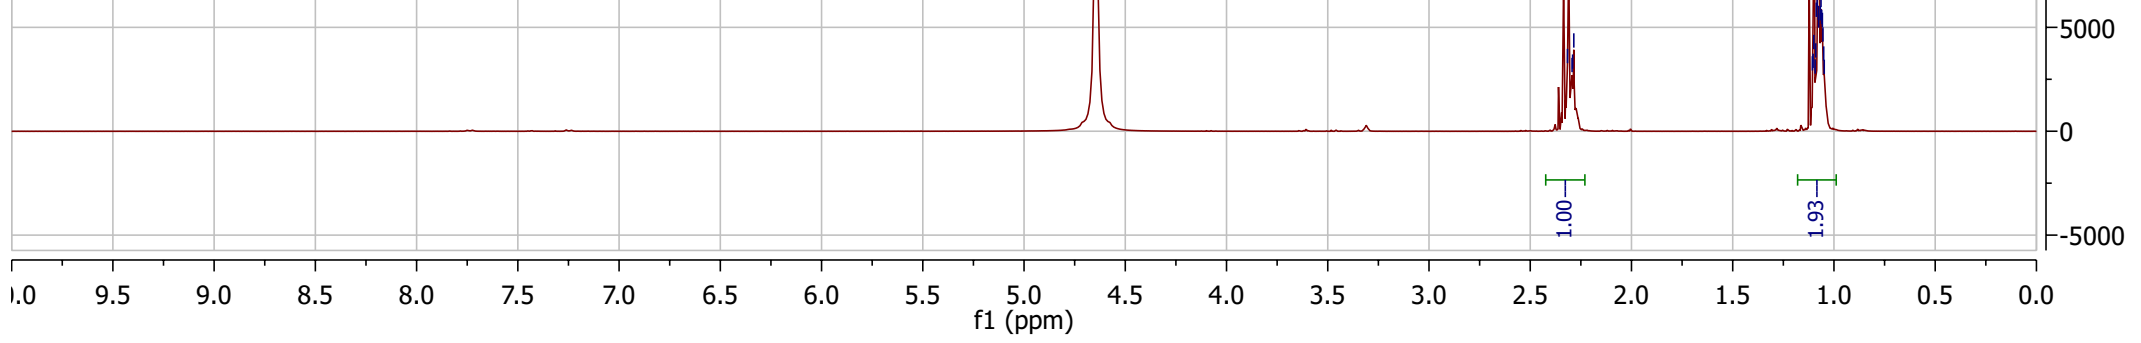

171220.f322.11.fid  
Dong, Kd4194  
C13CPD CD3OD\_SPE (C:\Bruker\TopSpin3.5\pl6) 1712 22

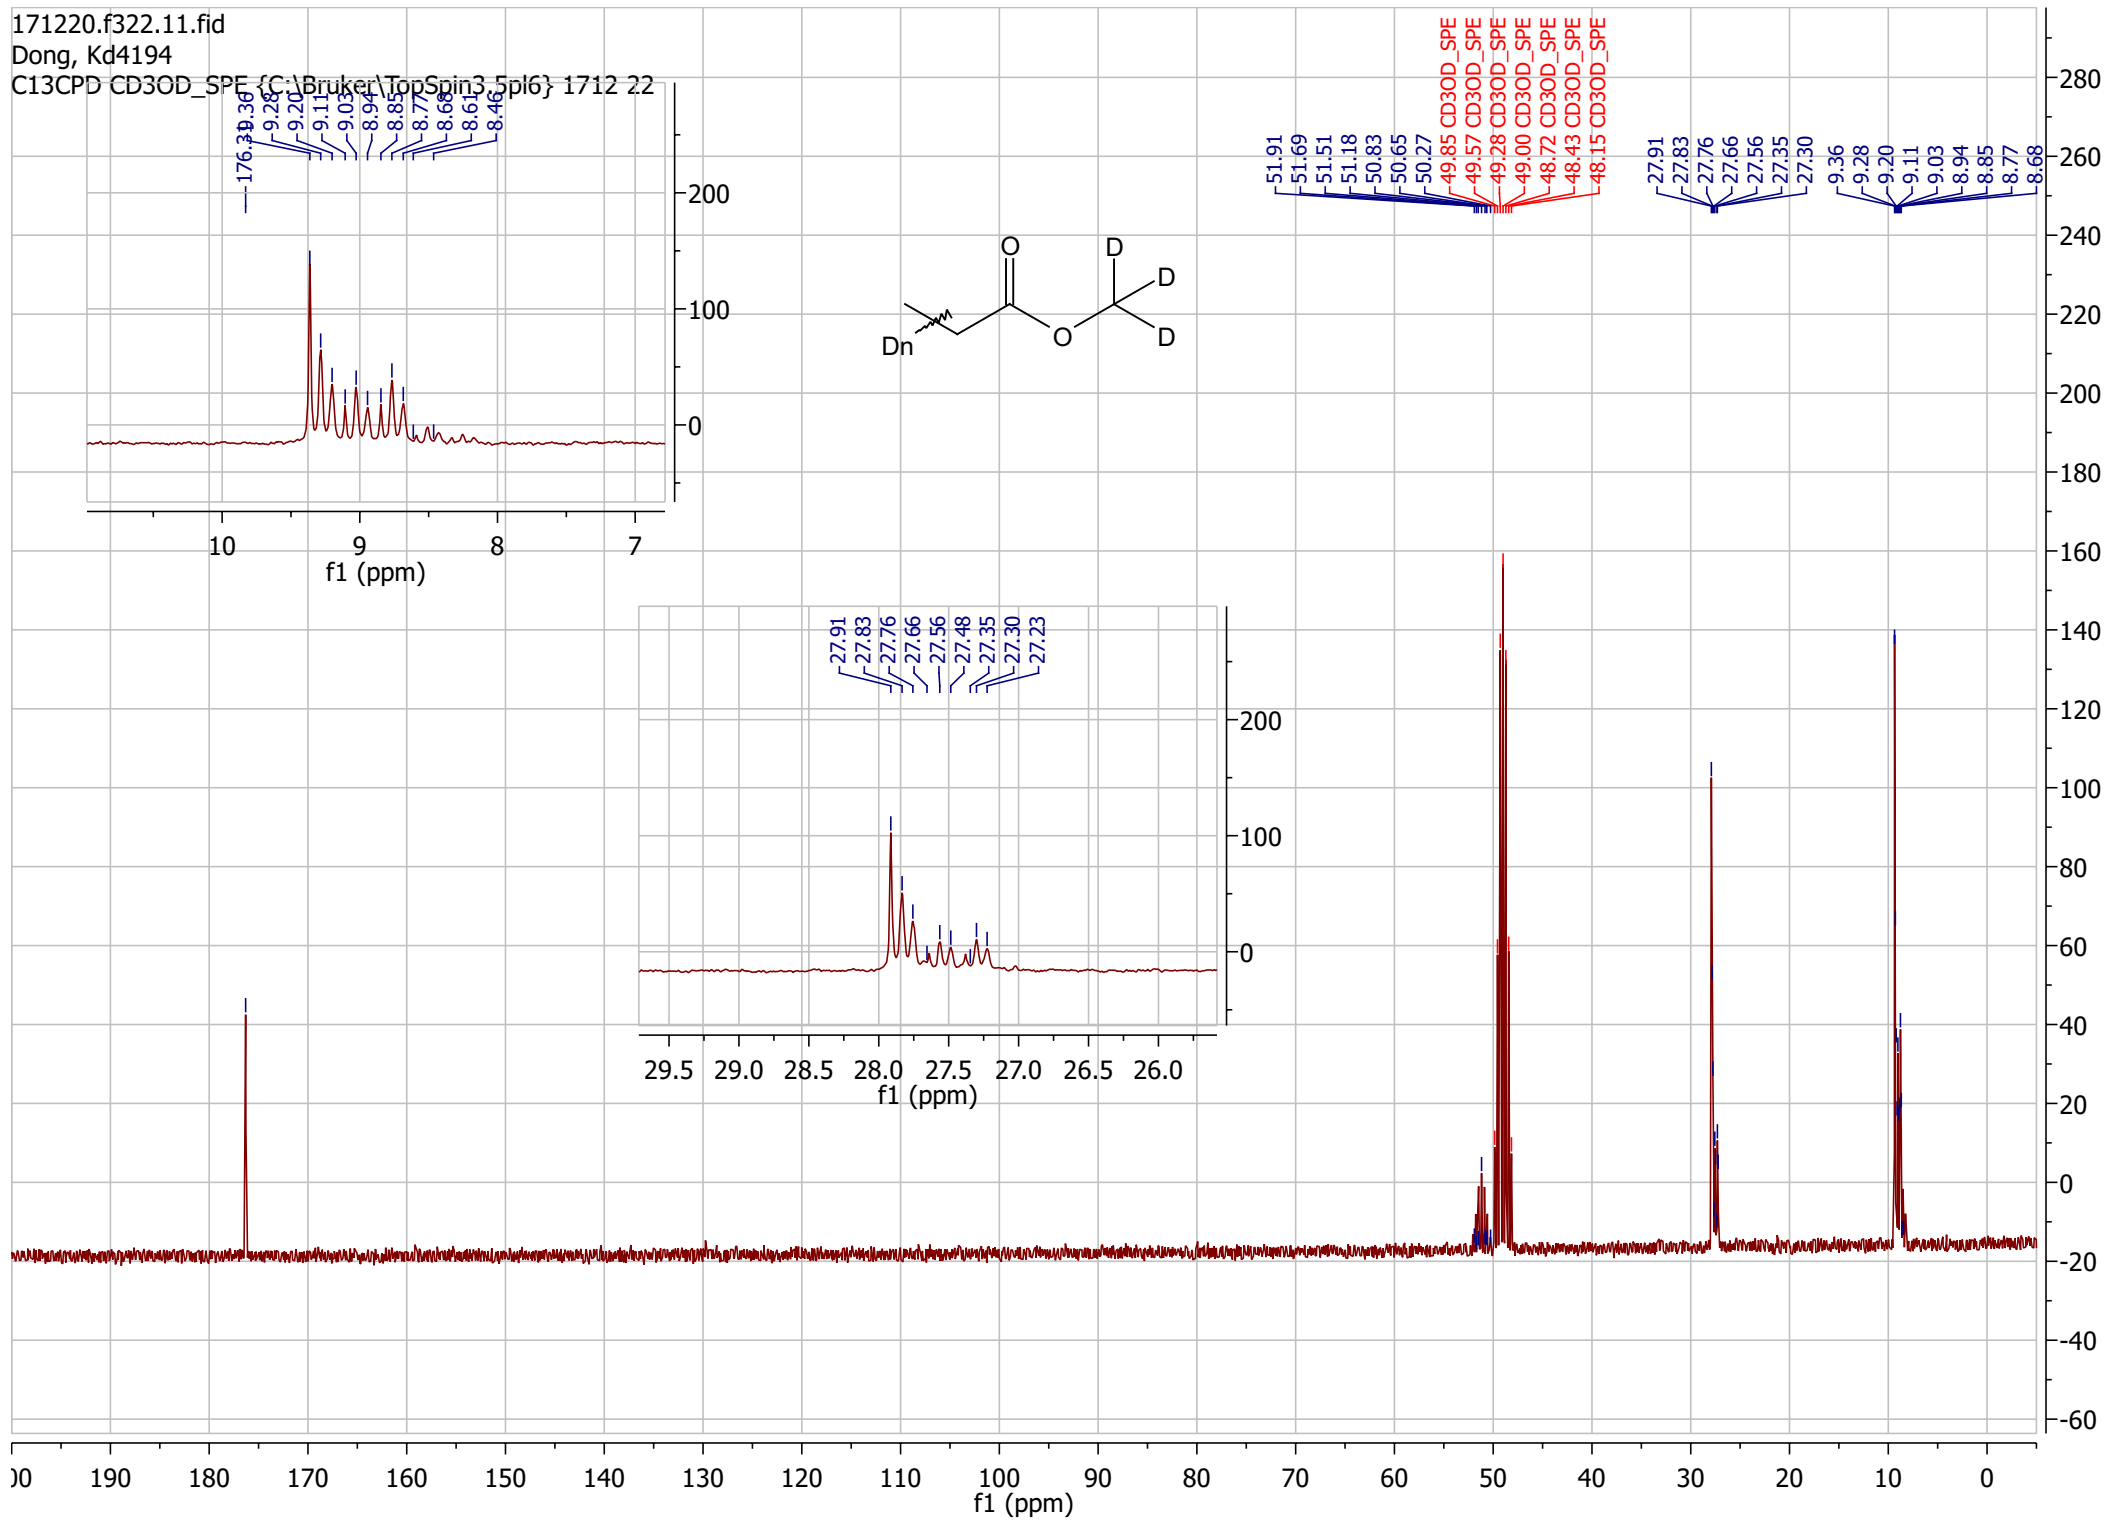

[Type text]

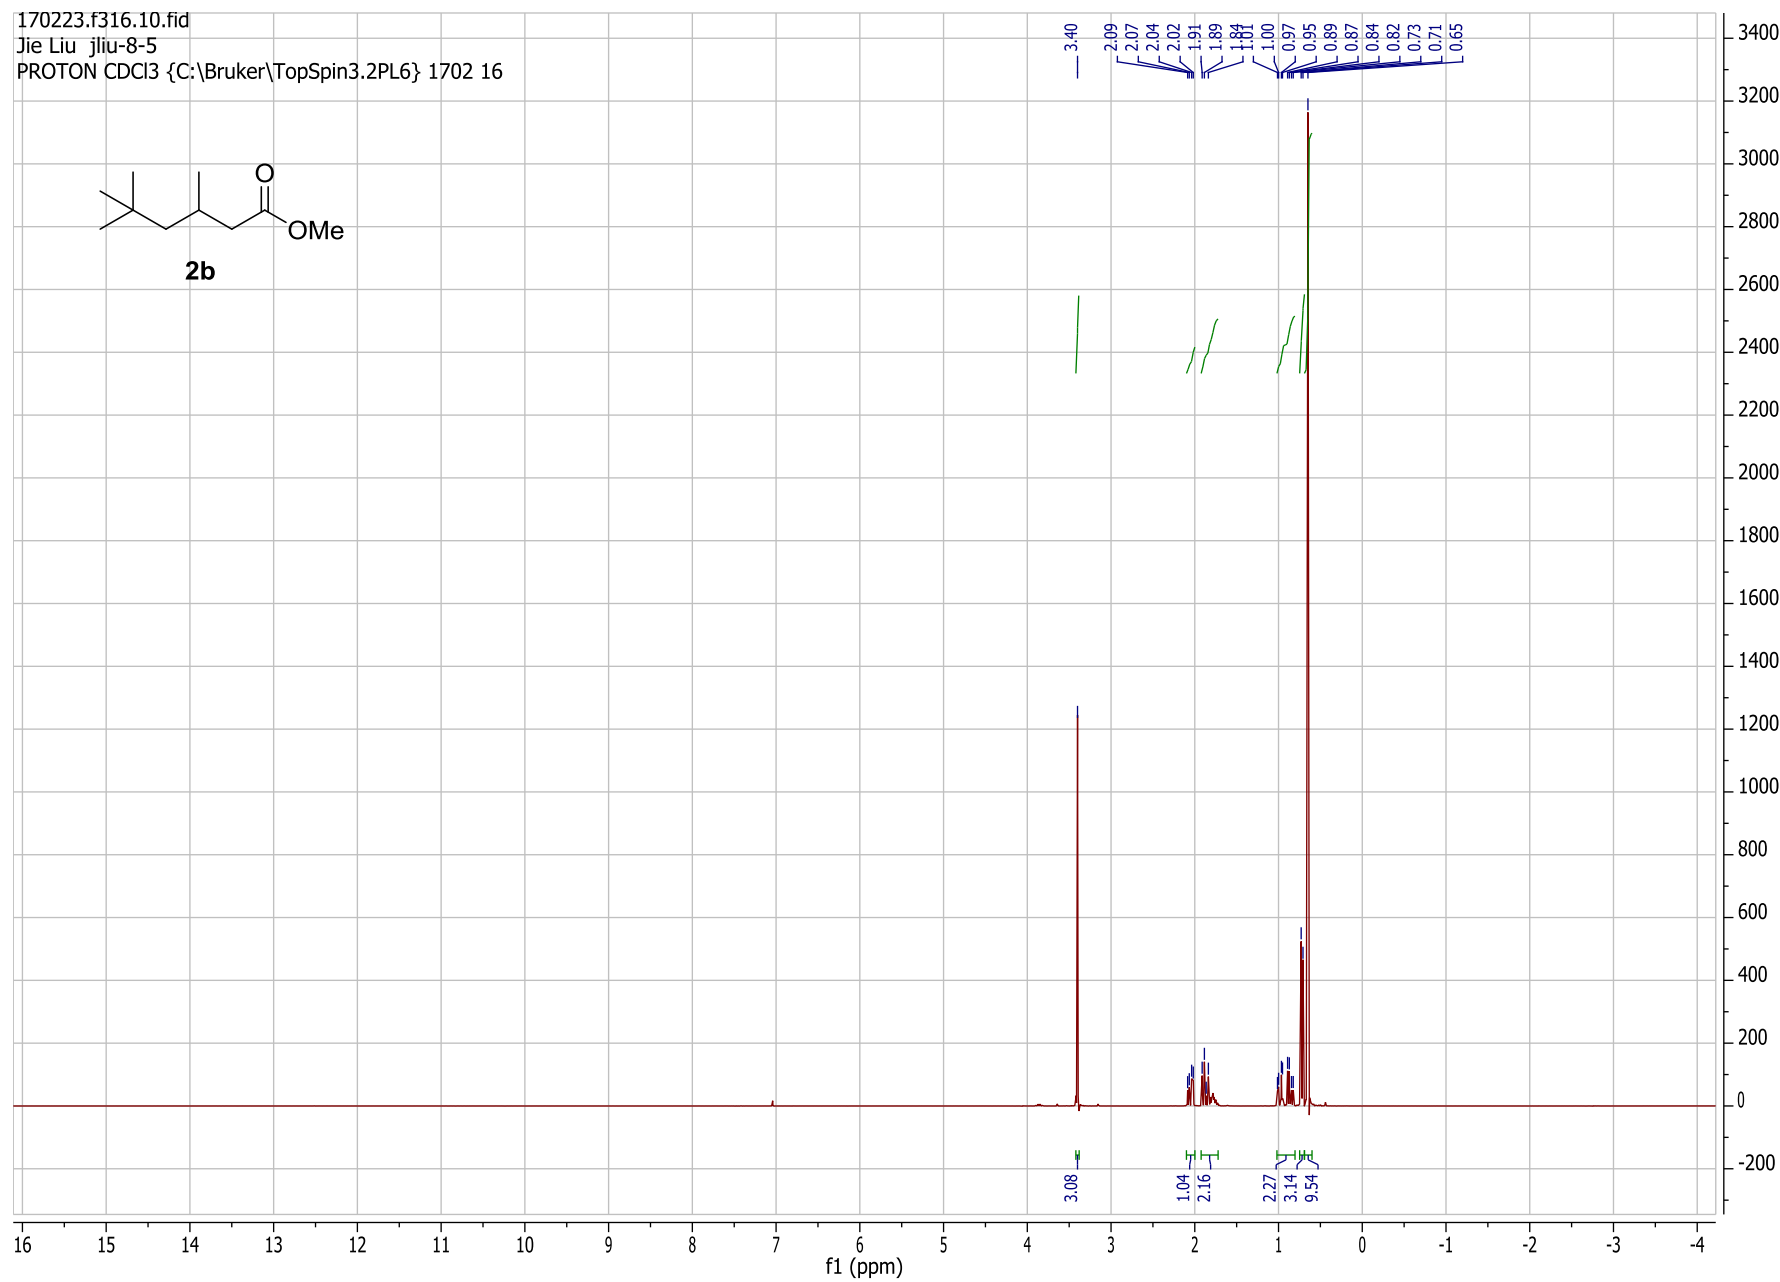

[Type text]

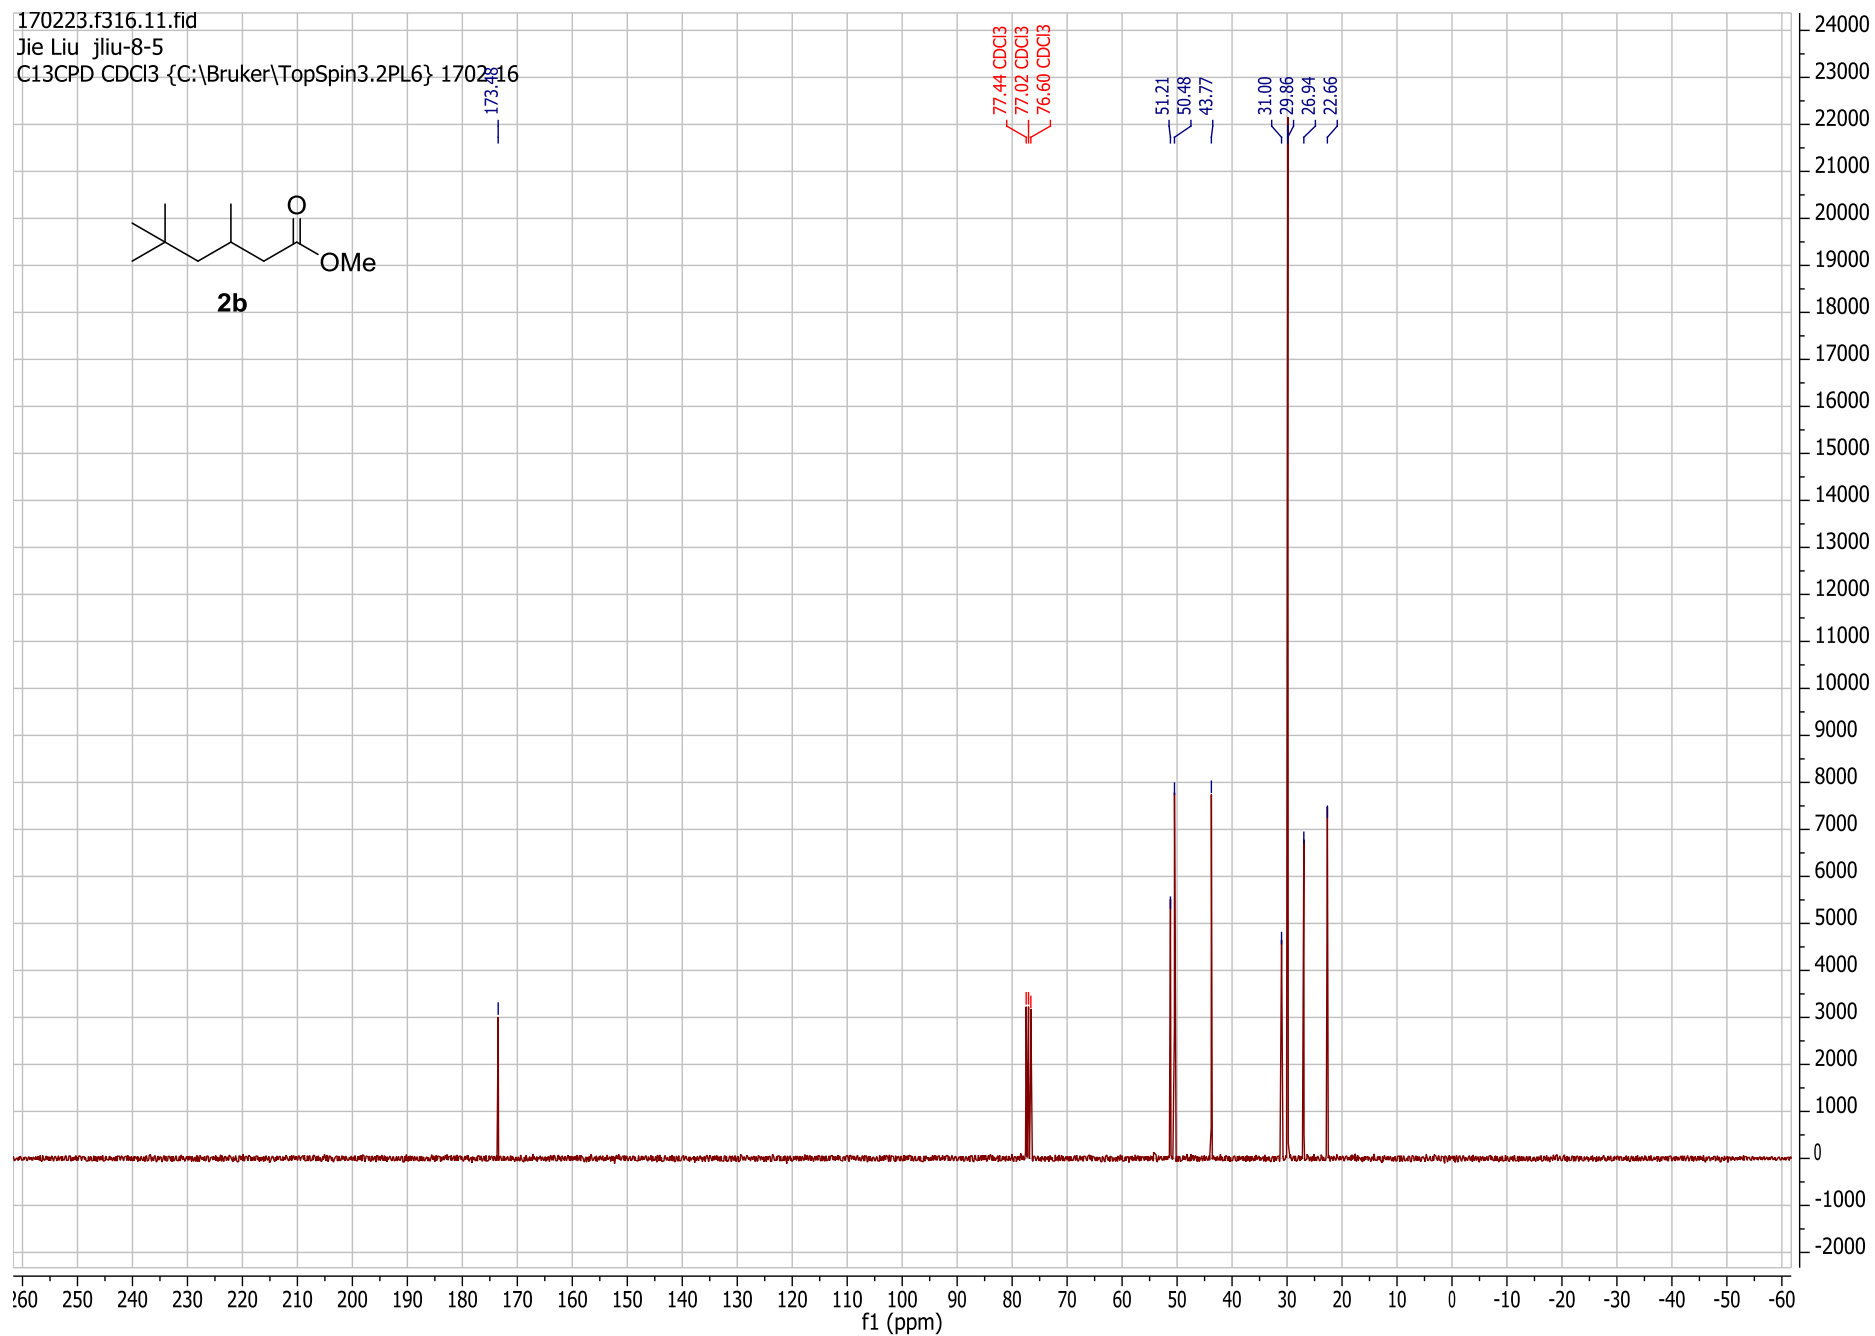

[Type text]

170302.f319.10.fid  
Jie Liu jliu-8-15-2  
PROTON CDCl3 {C:\Bruker\TopSpin3.2PL6} 1703 19

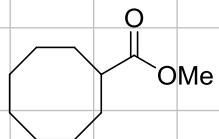

2d

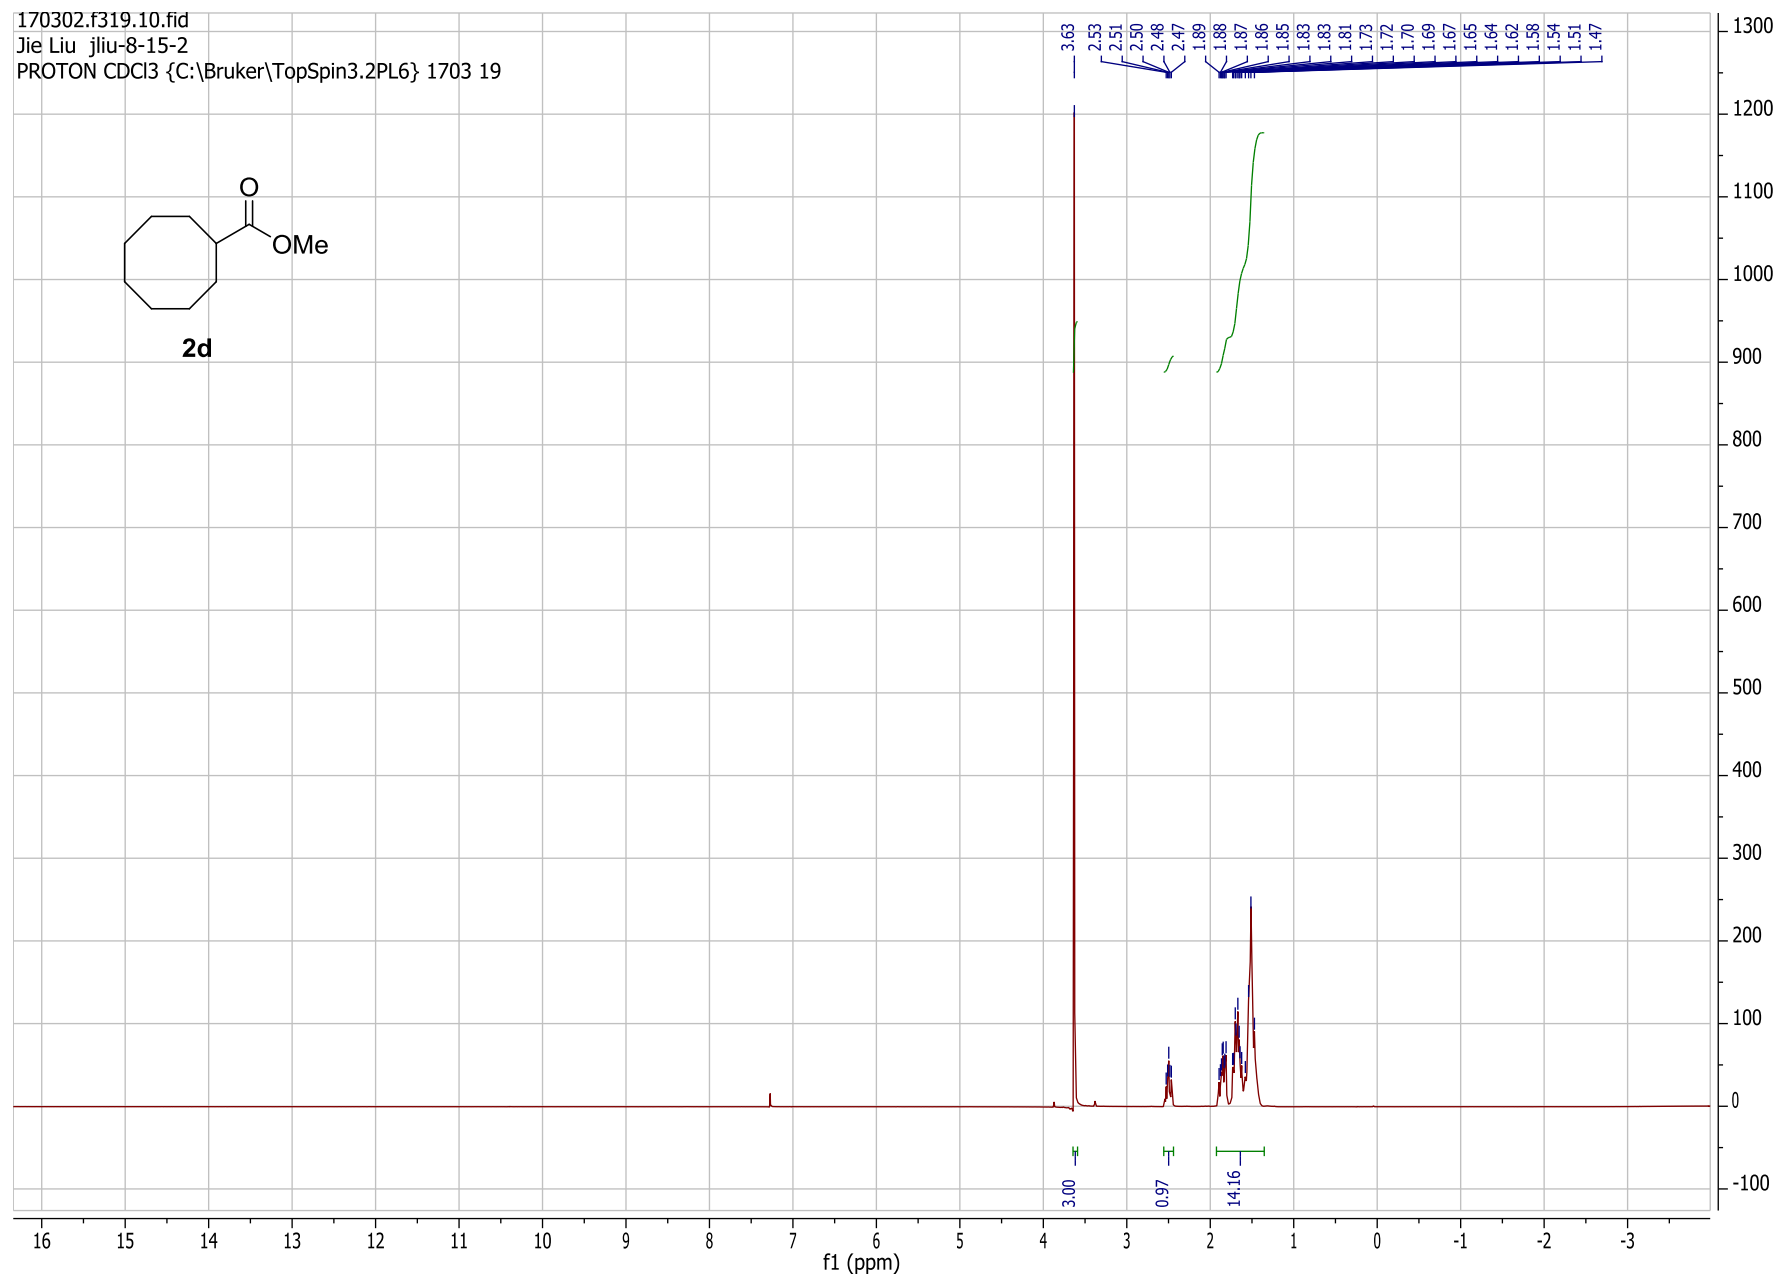

[Type text]

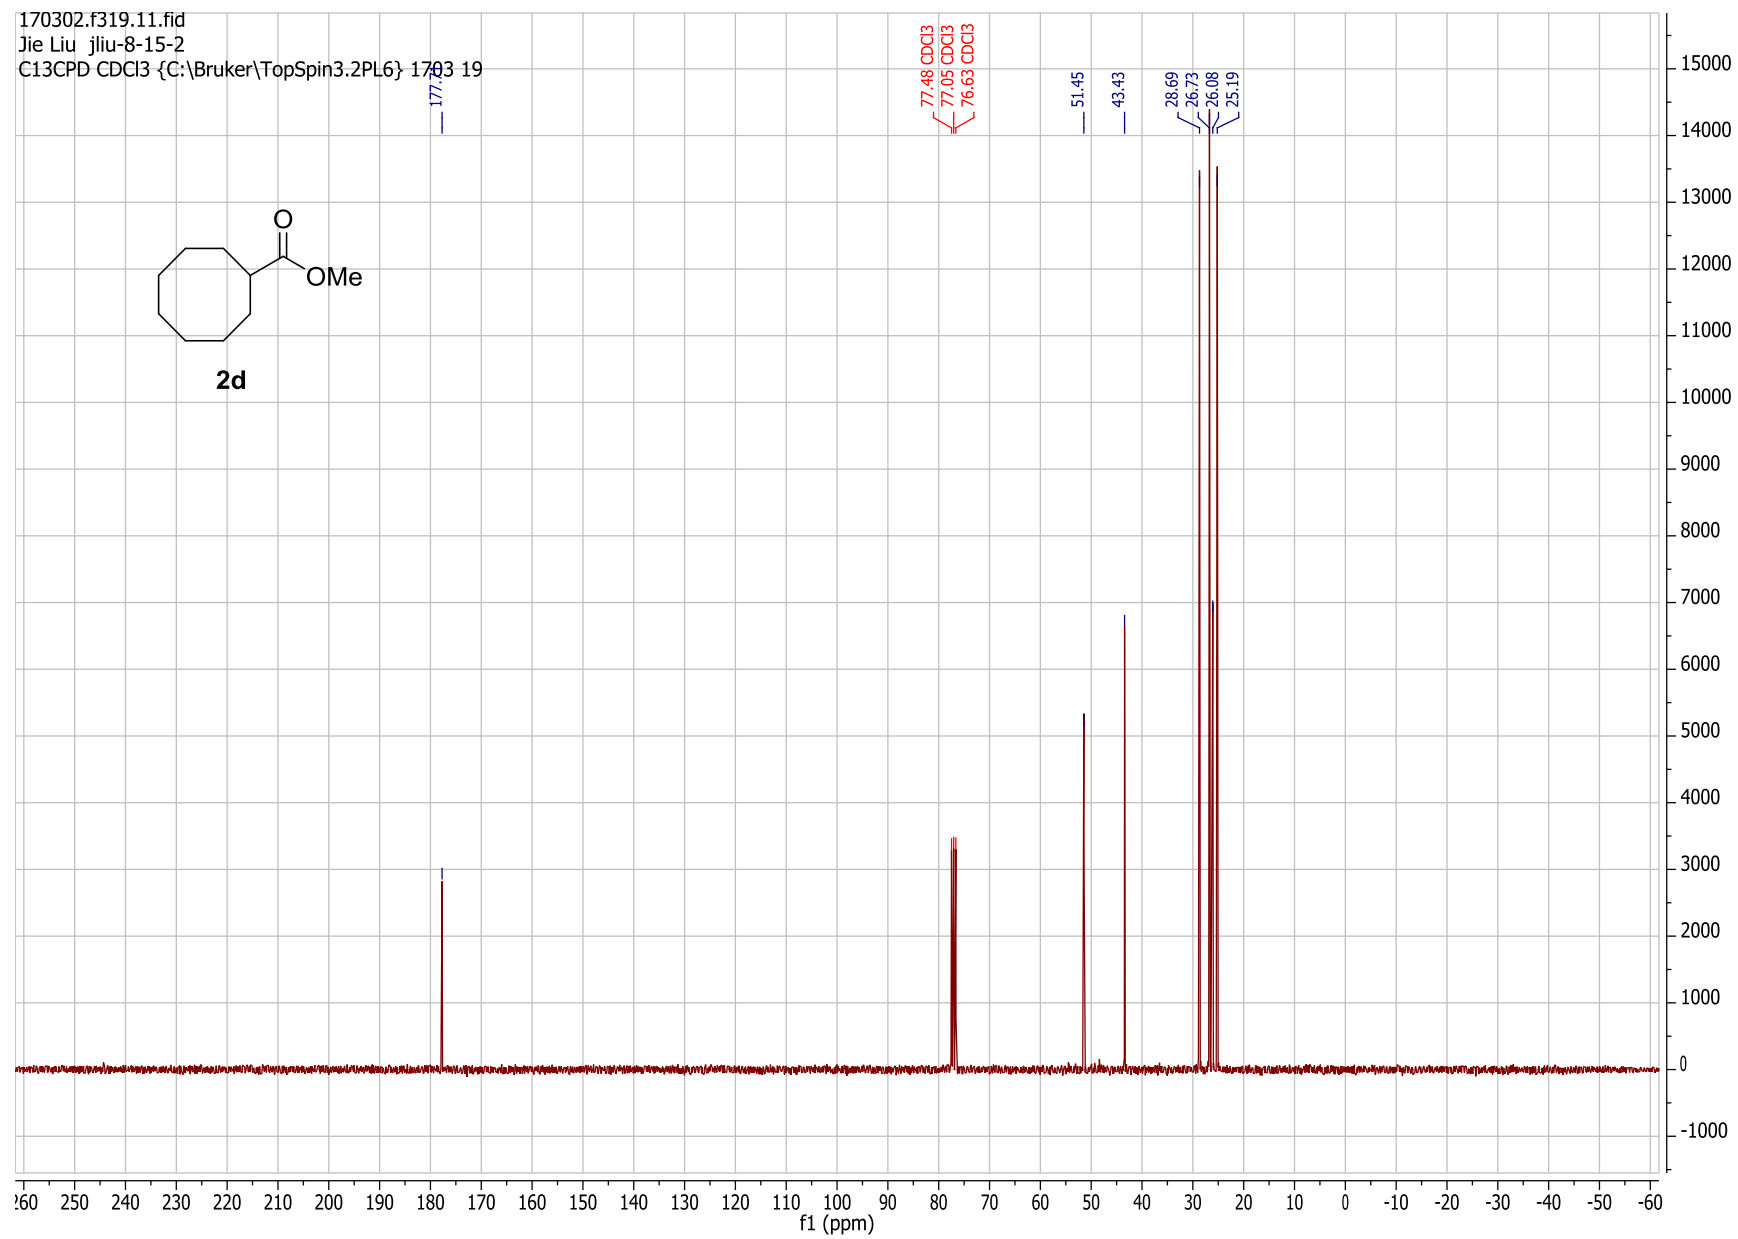

[Type text]

160725.f309.10.fid

Jie Liu jliu-6-141-3

PROTON CDCl3 {C:\Bruker\TopSpin3.2PL6} 1607 9

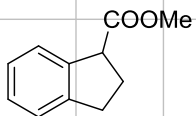

2e

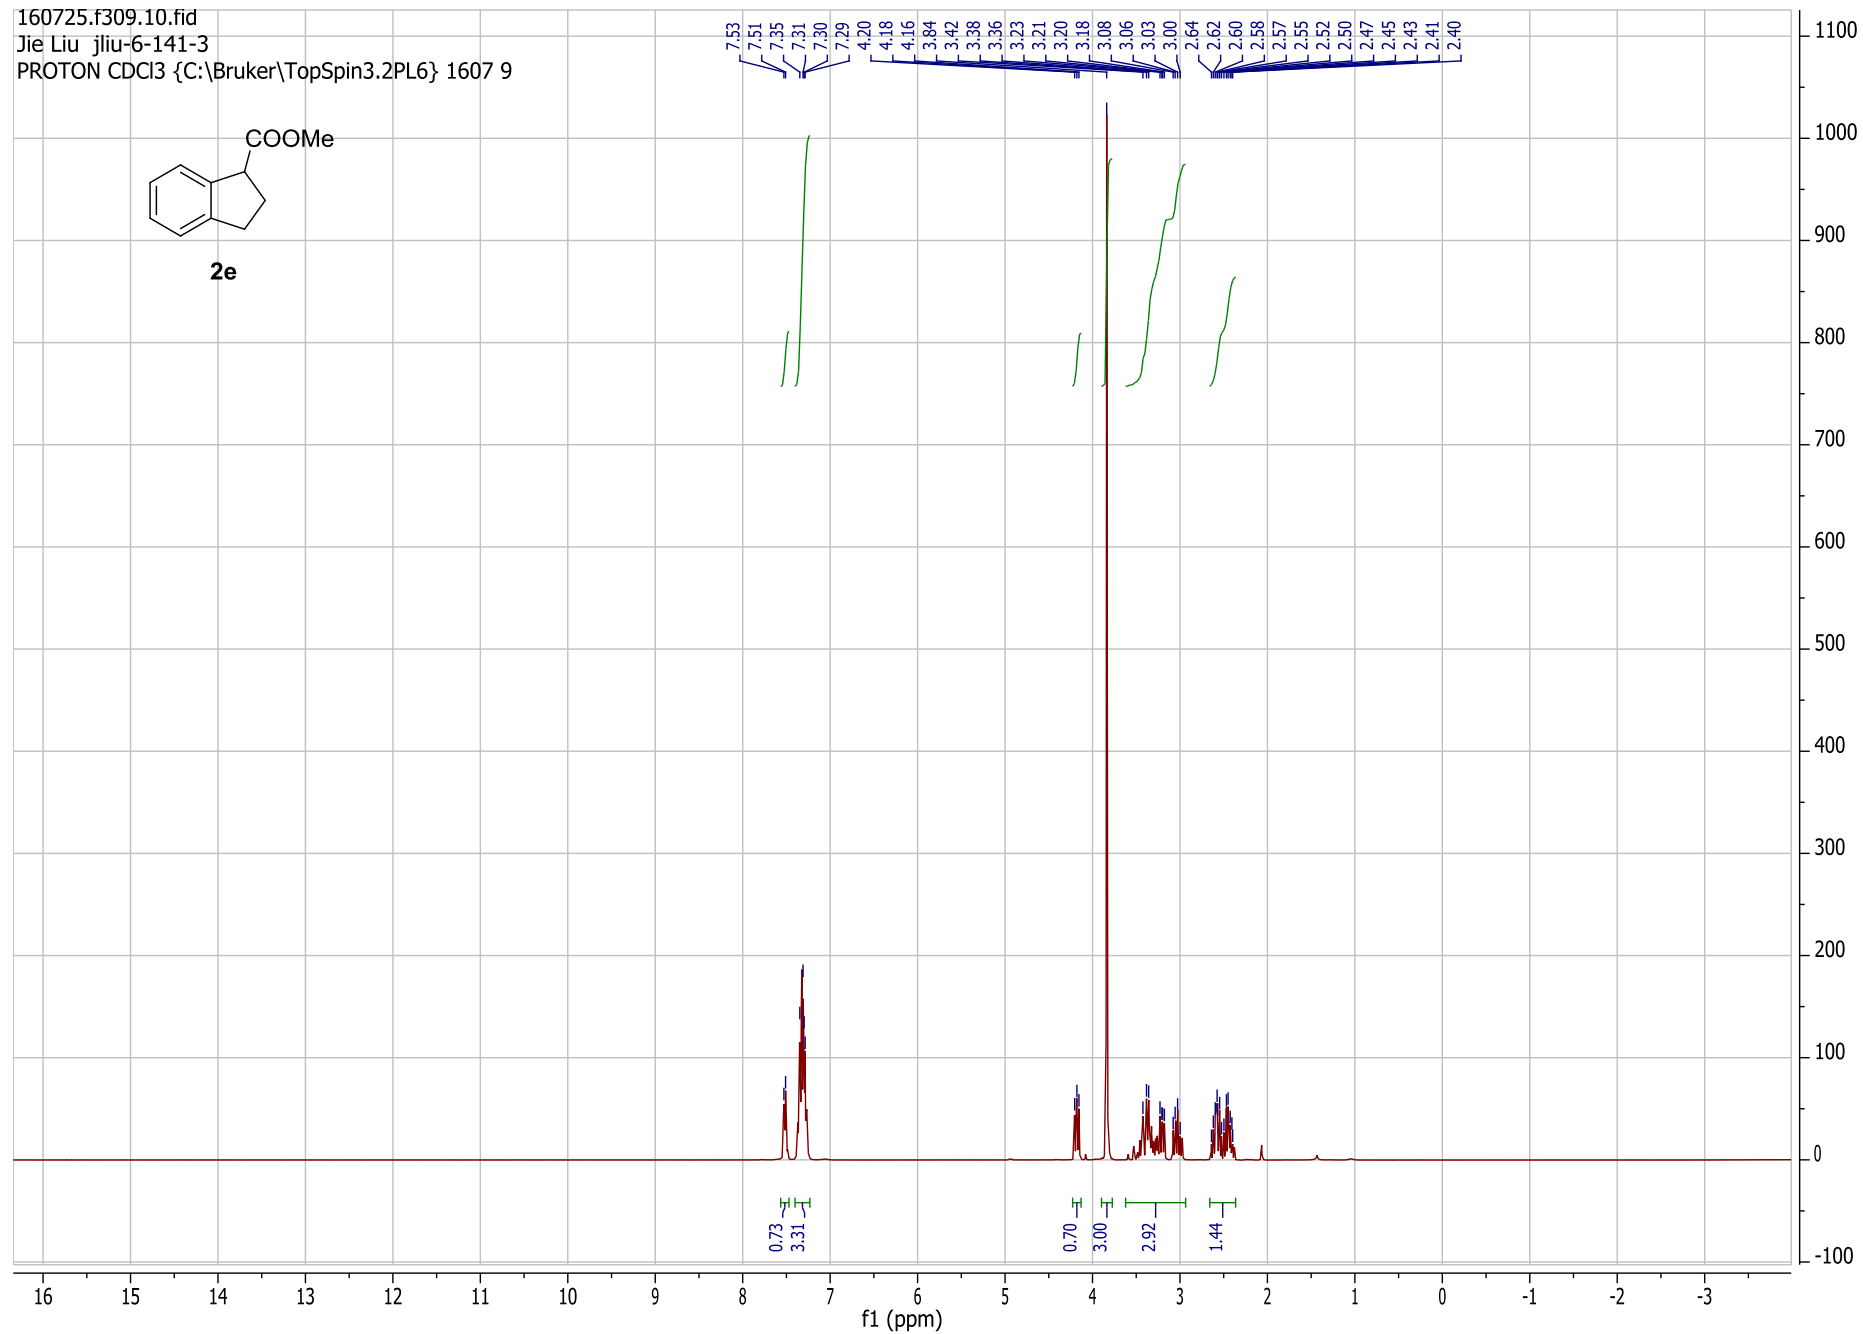

[Type text]

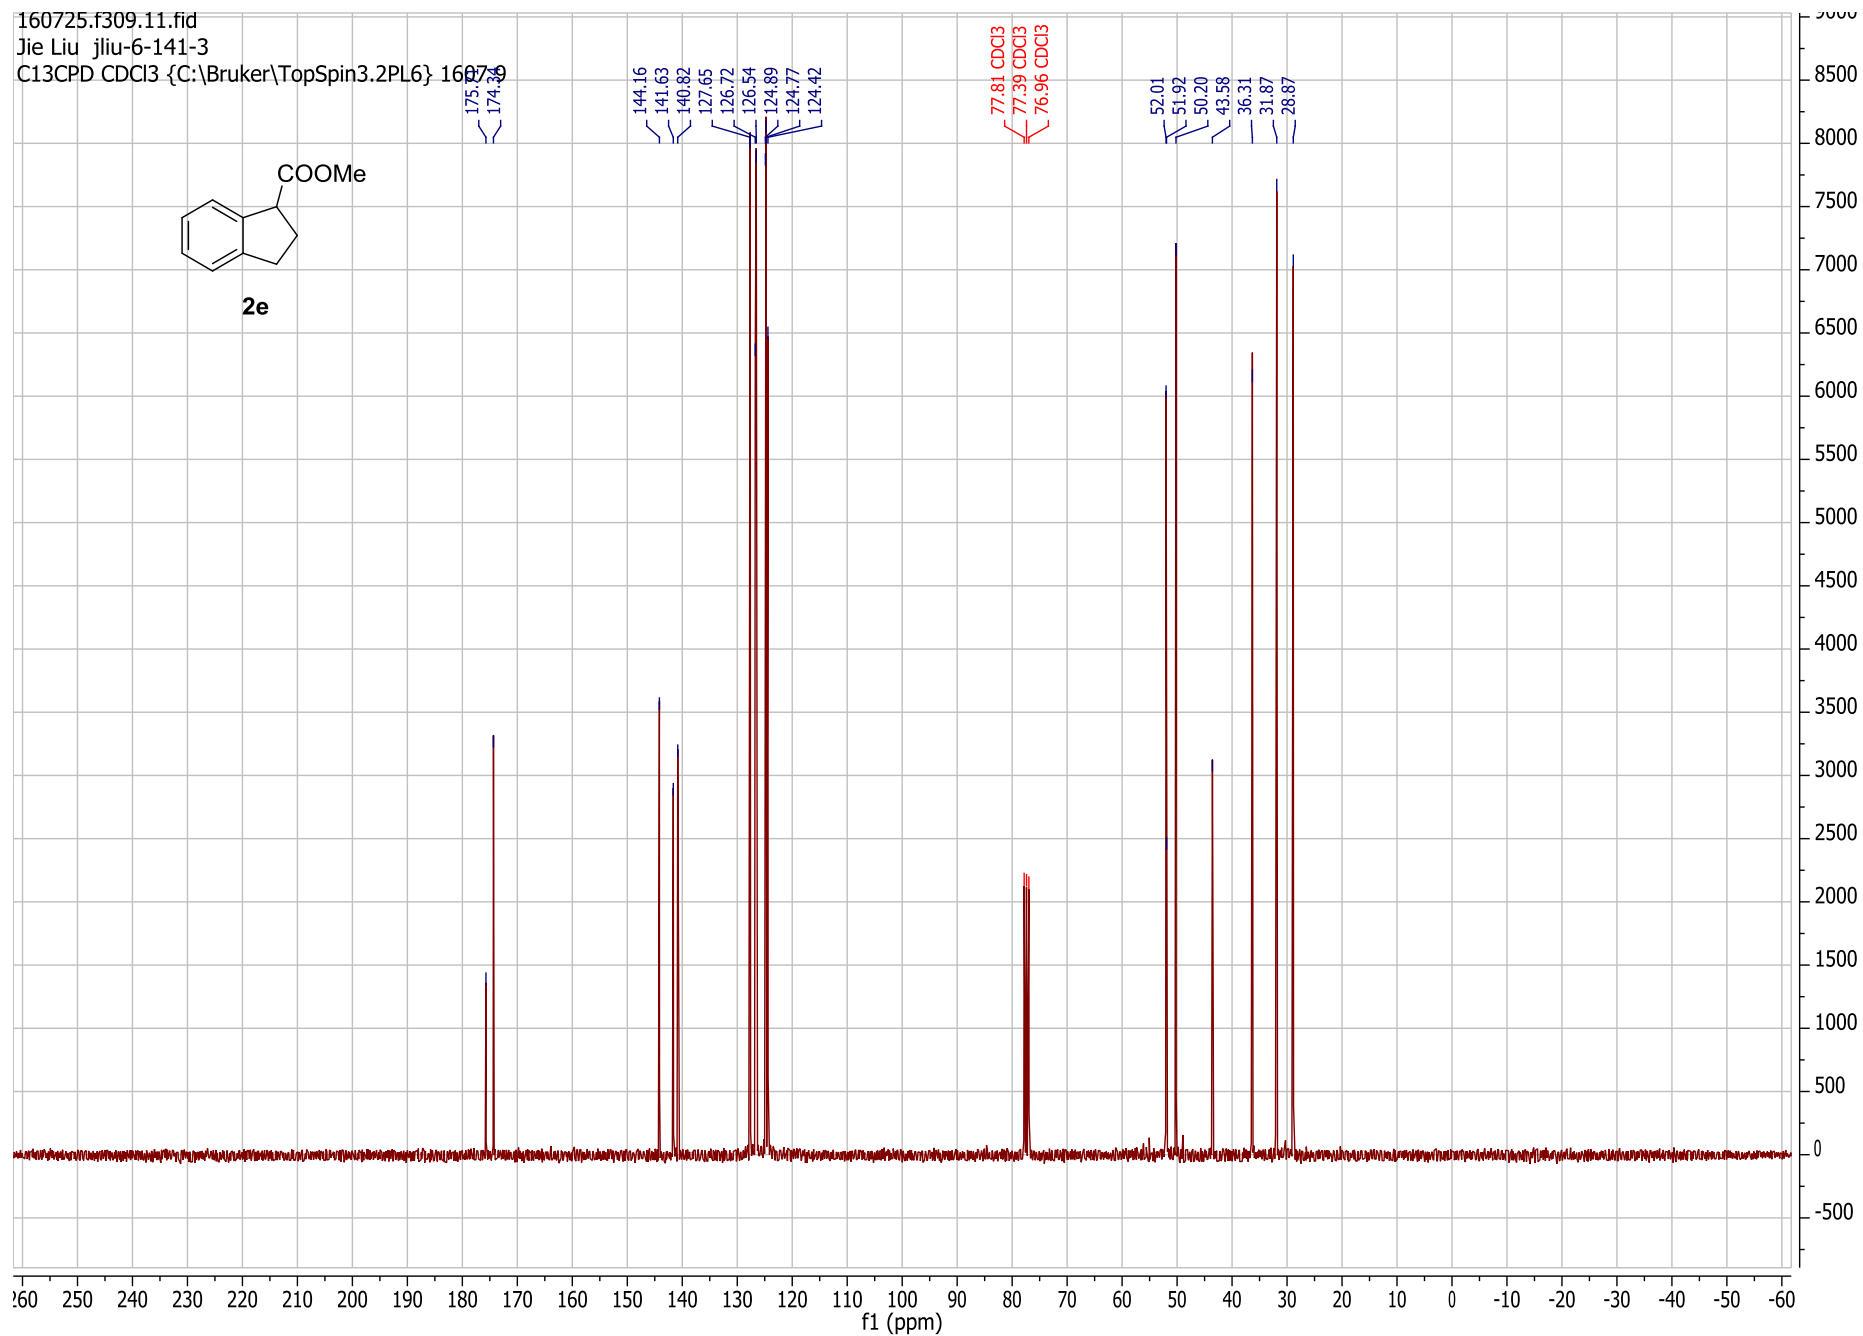



[Type text]

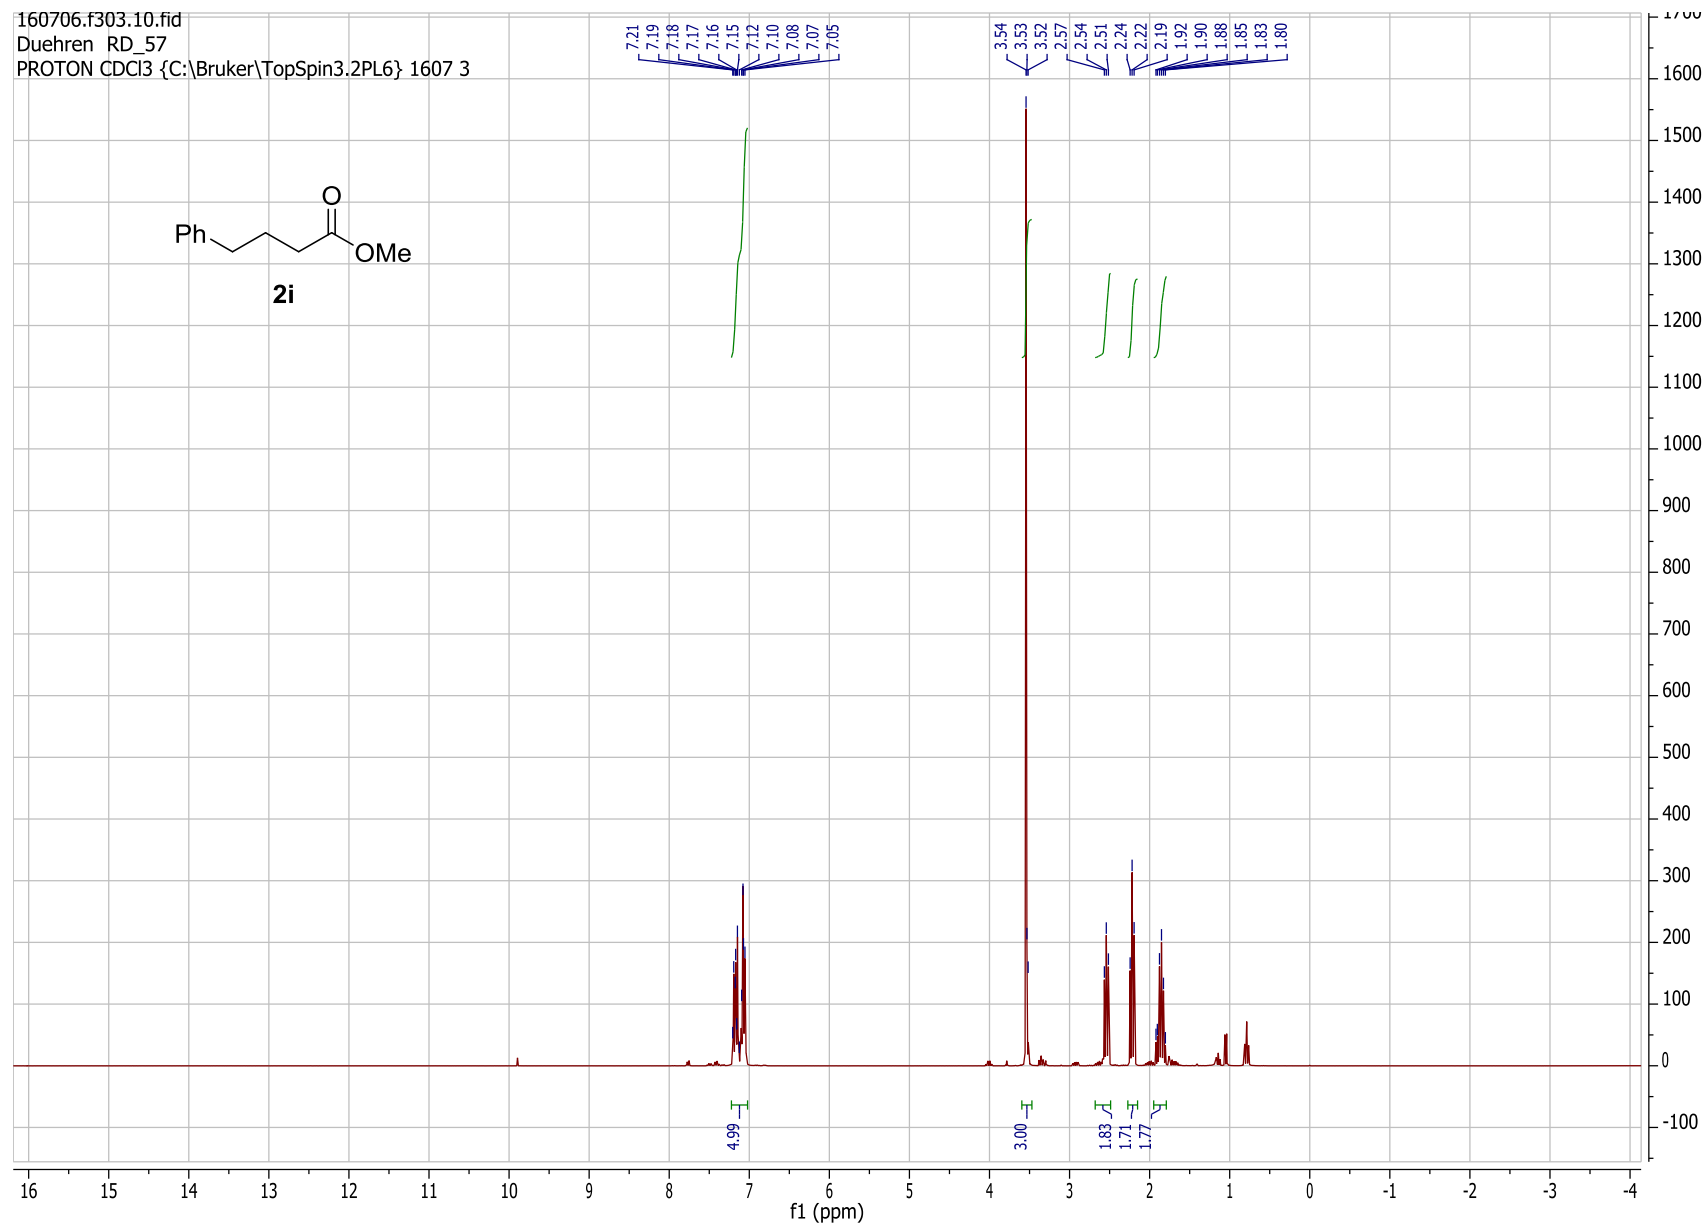

[Type text]

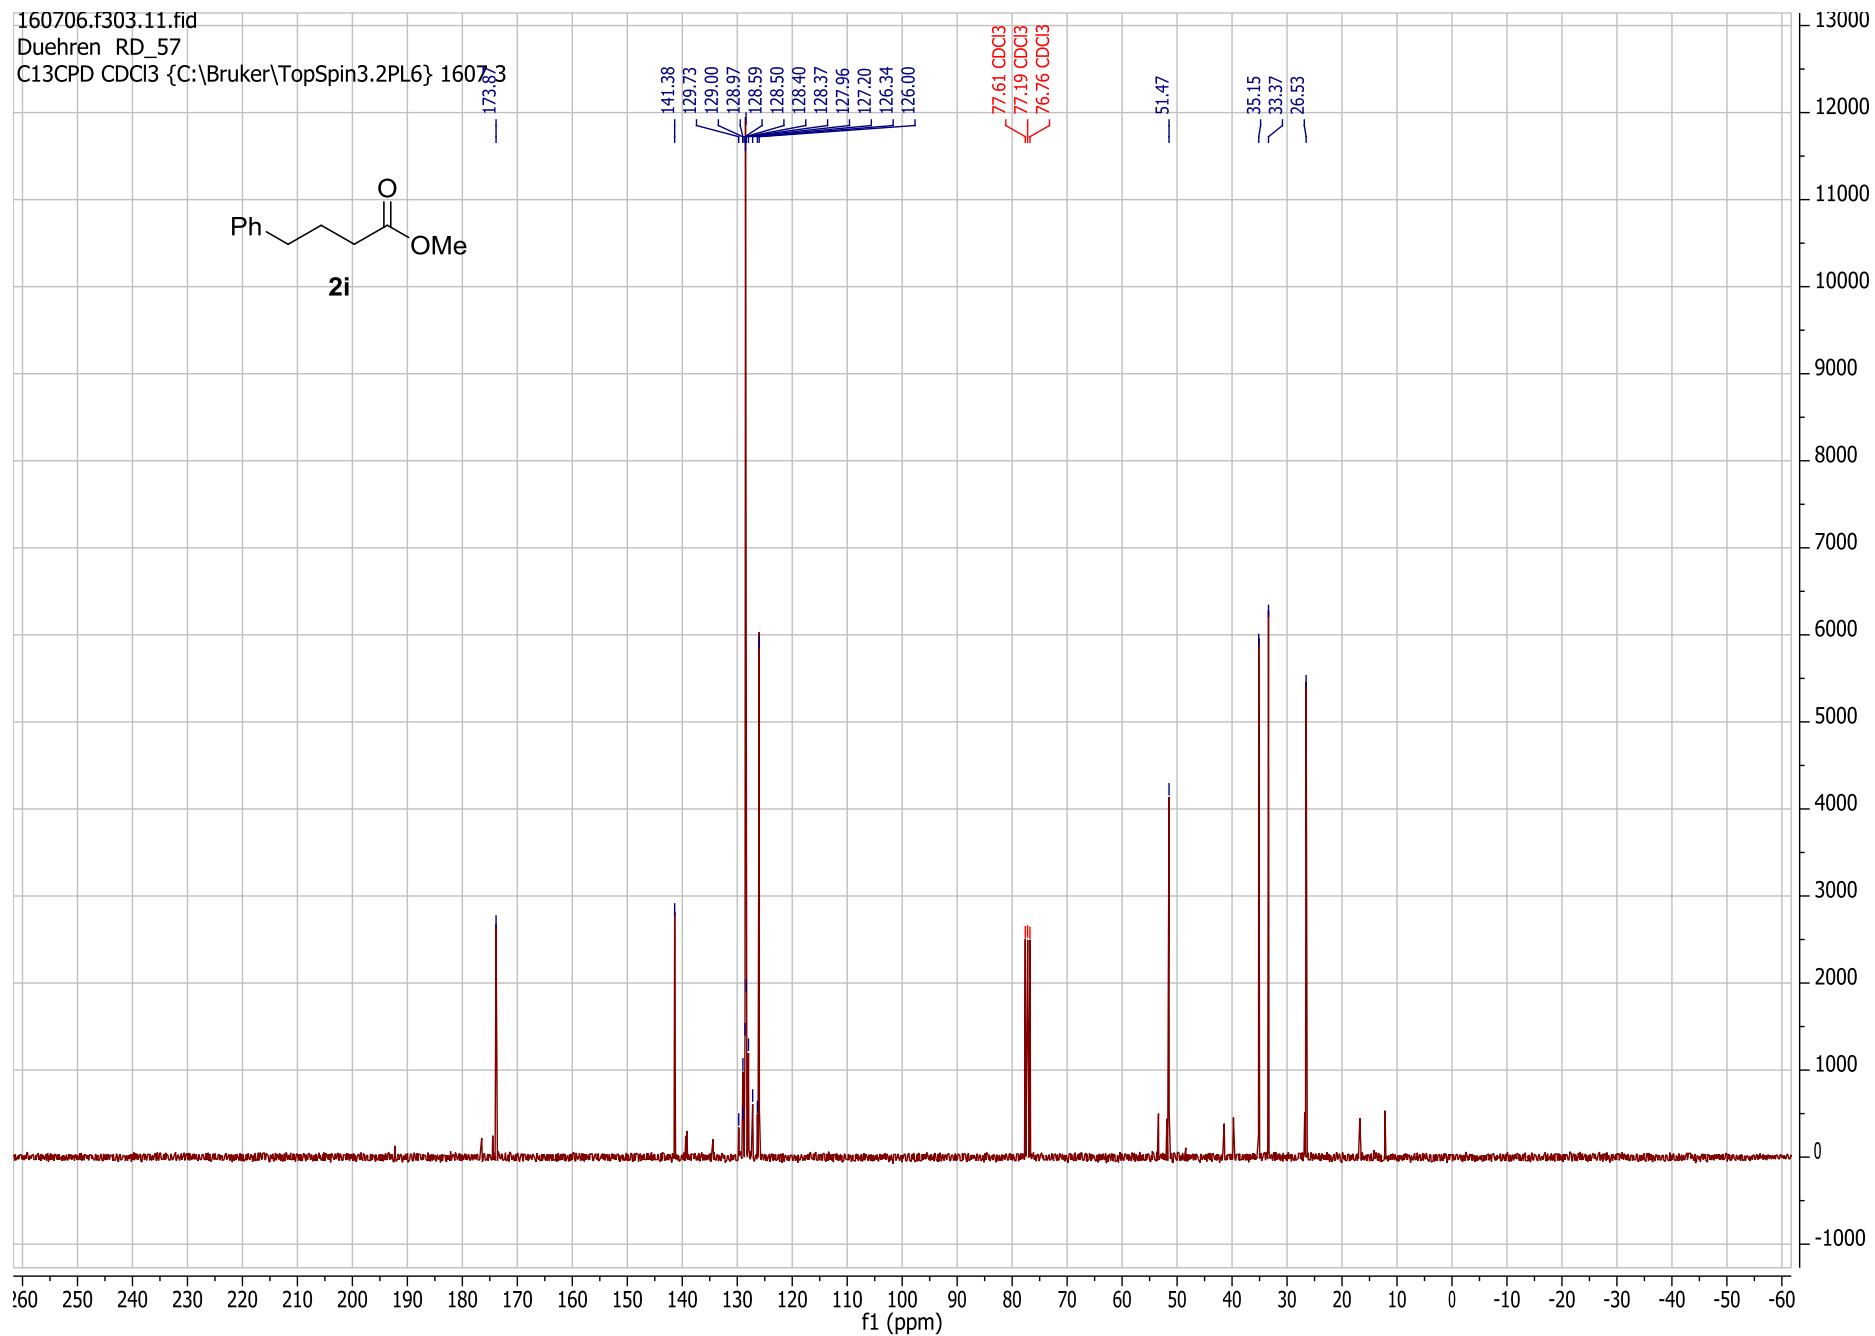

[Type text]

160728.f307.10.fid  
Jie Liu jliu-6-143-4  
PROTON CDCl3 {C:\Bruker\TopSpin3.2PL6} 1607 7

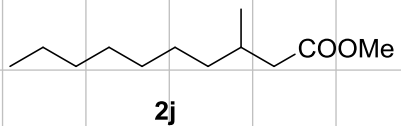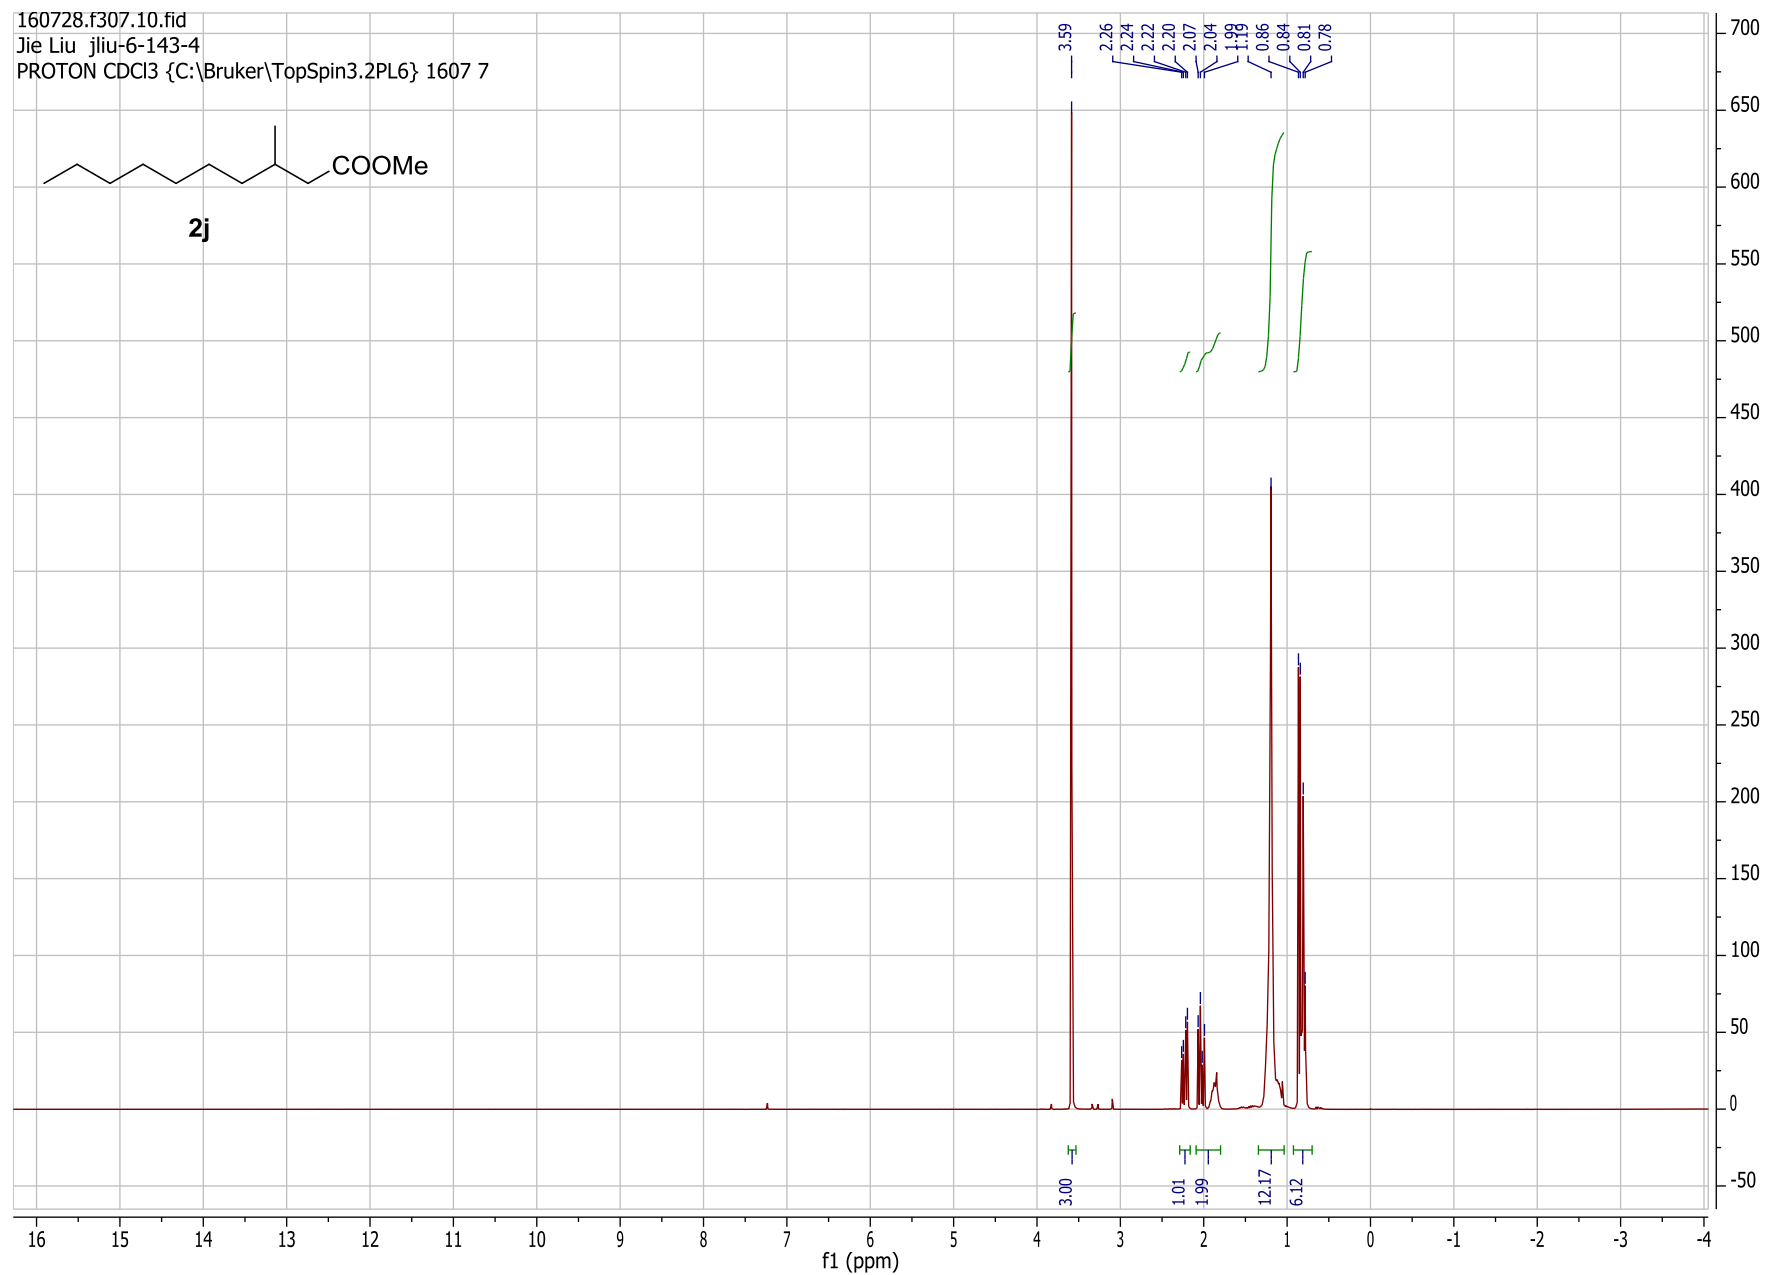

[Type text]

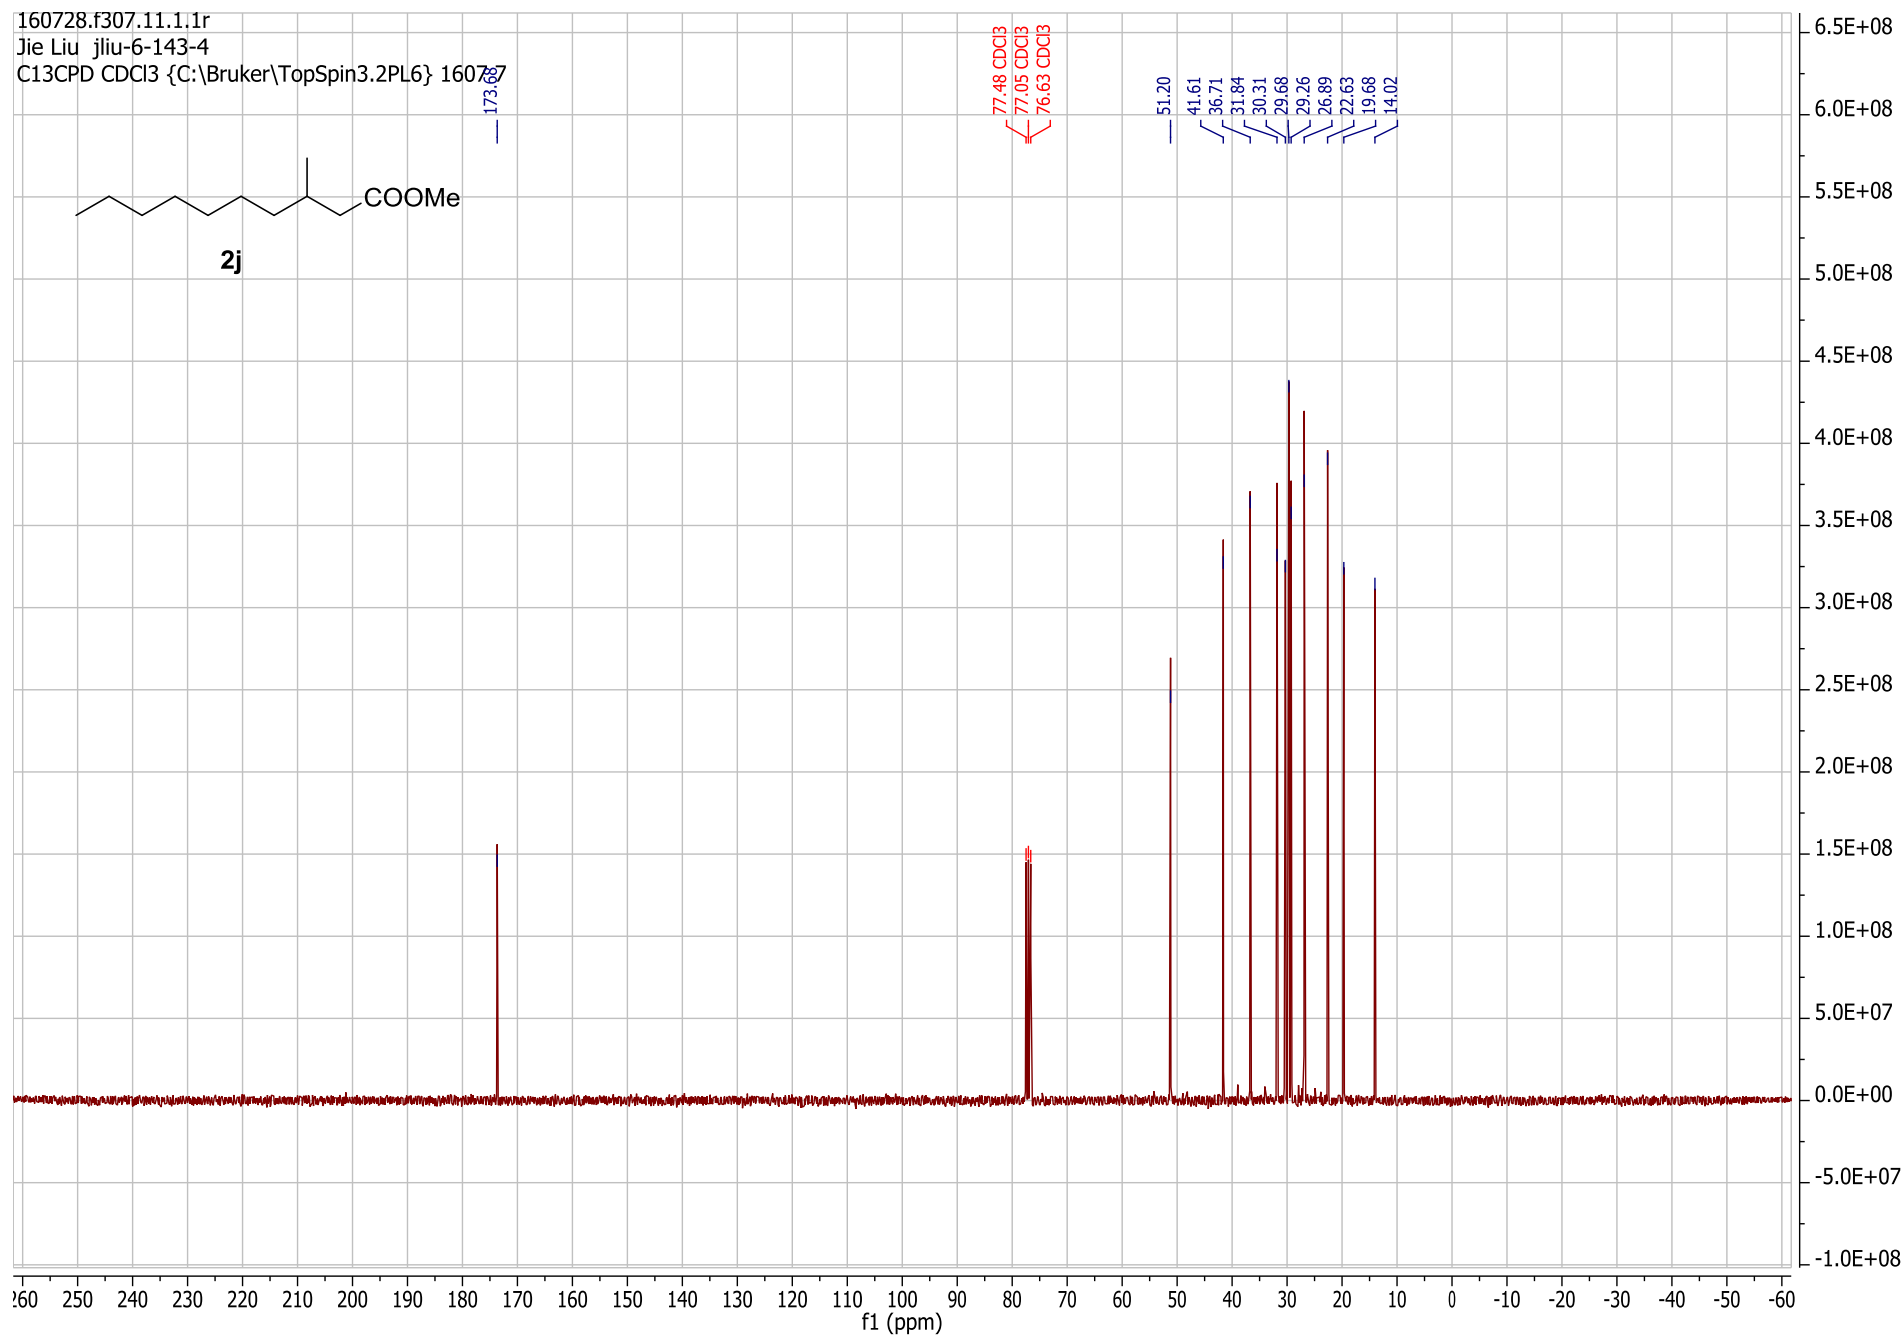

[Type text]

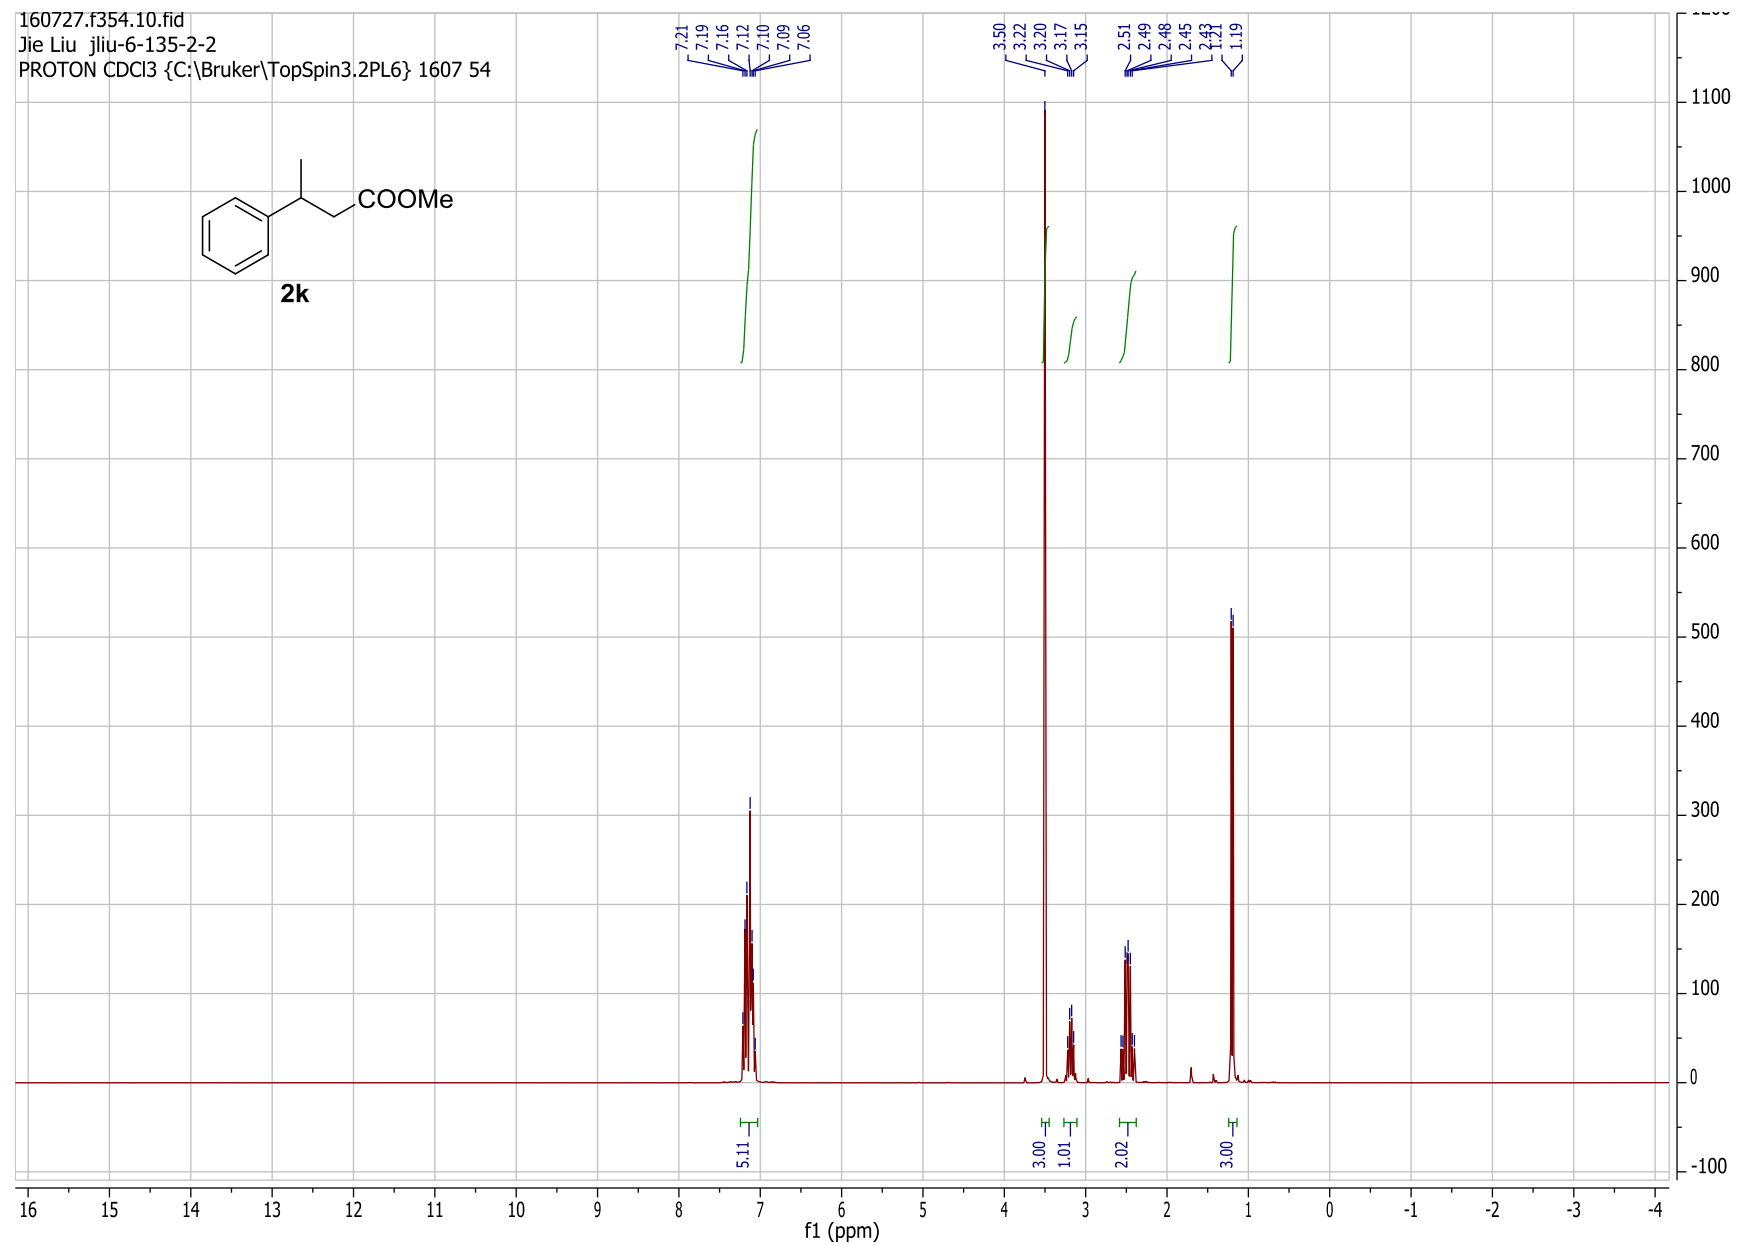

[Type text]

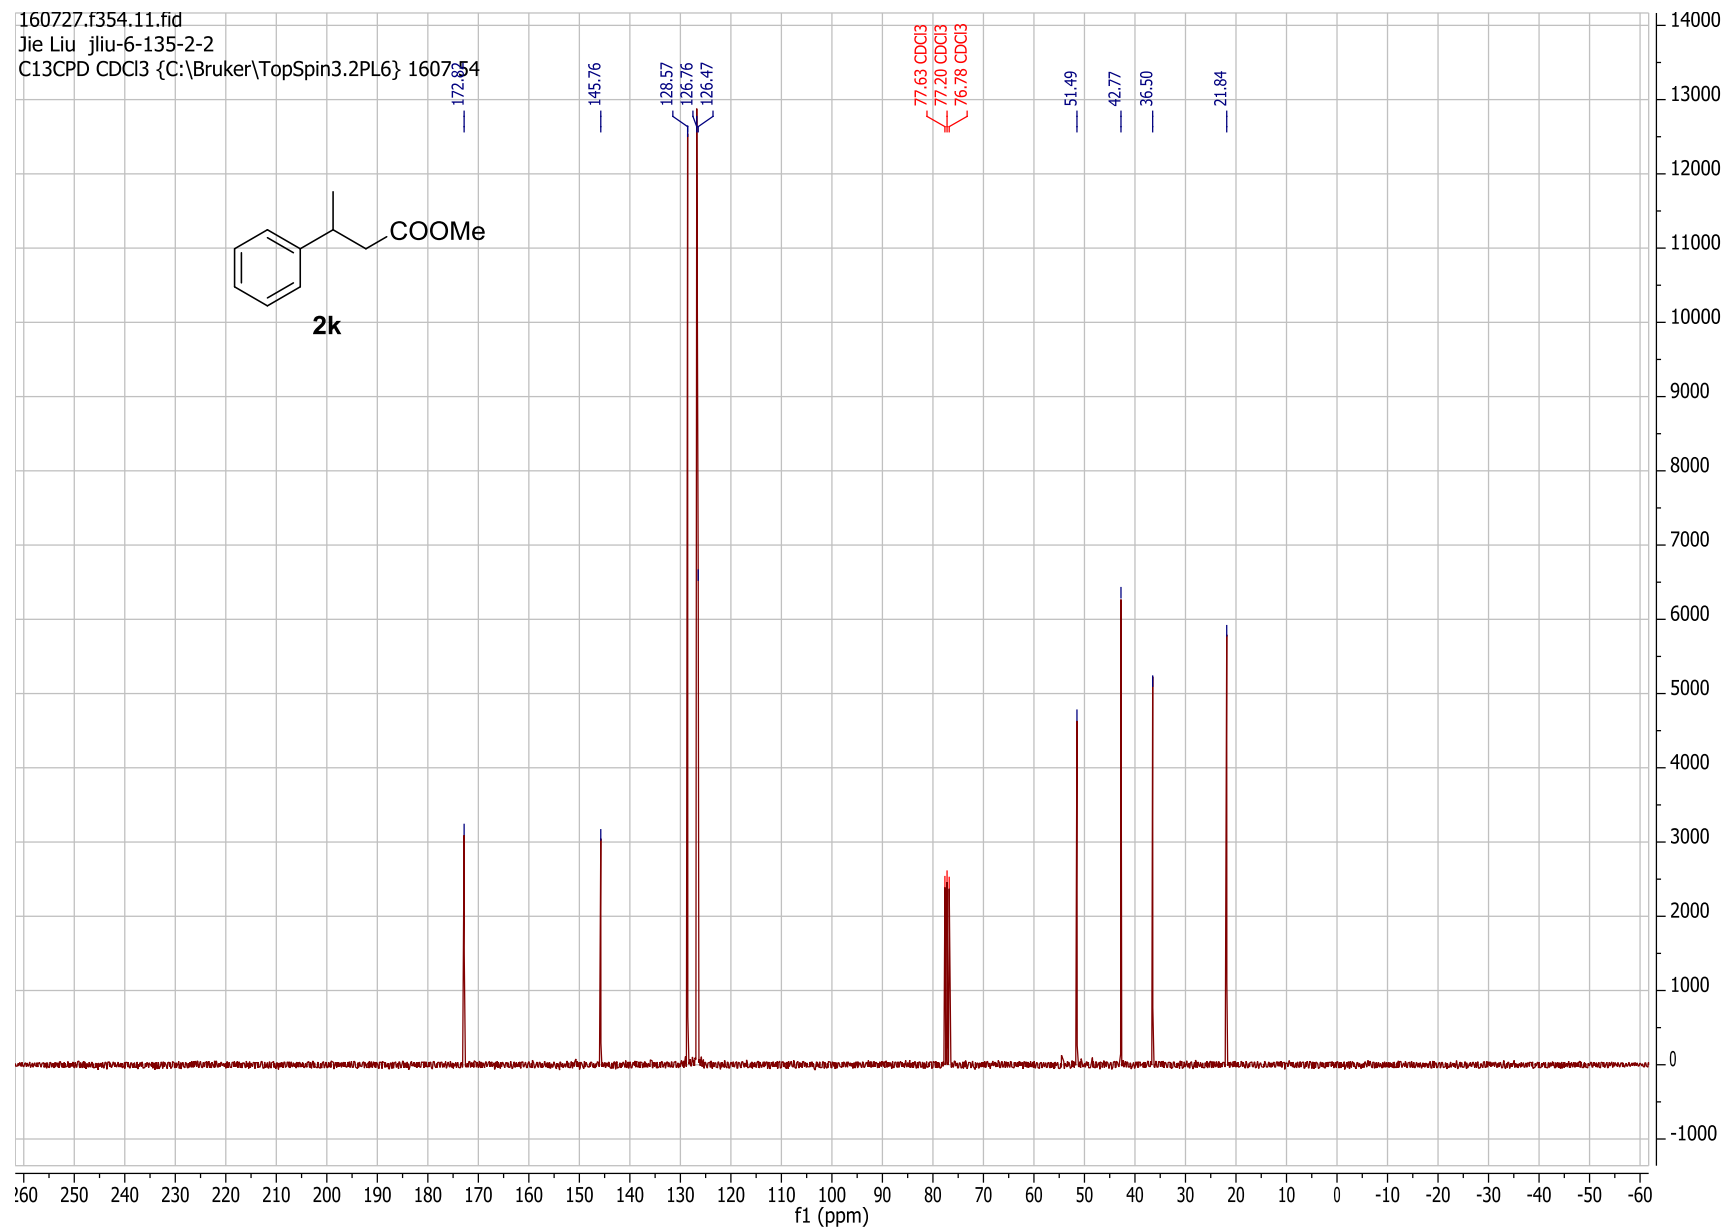

[Type text]

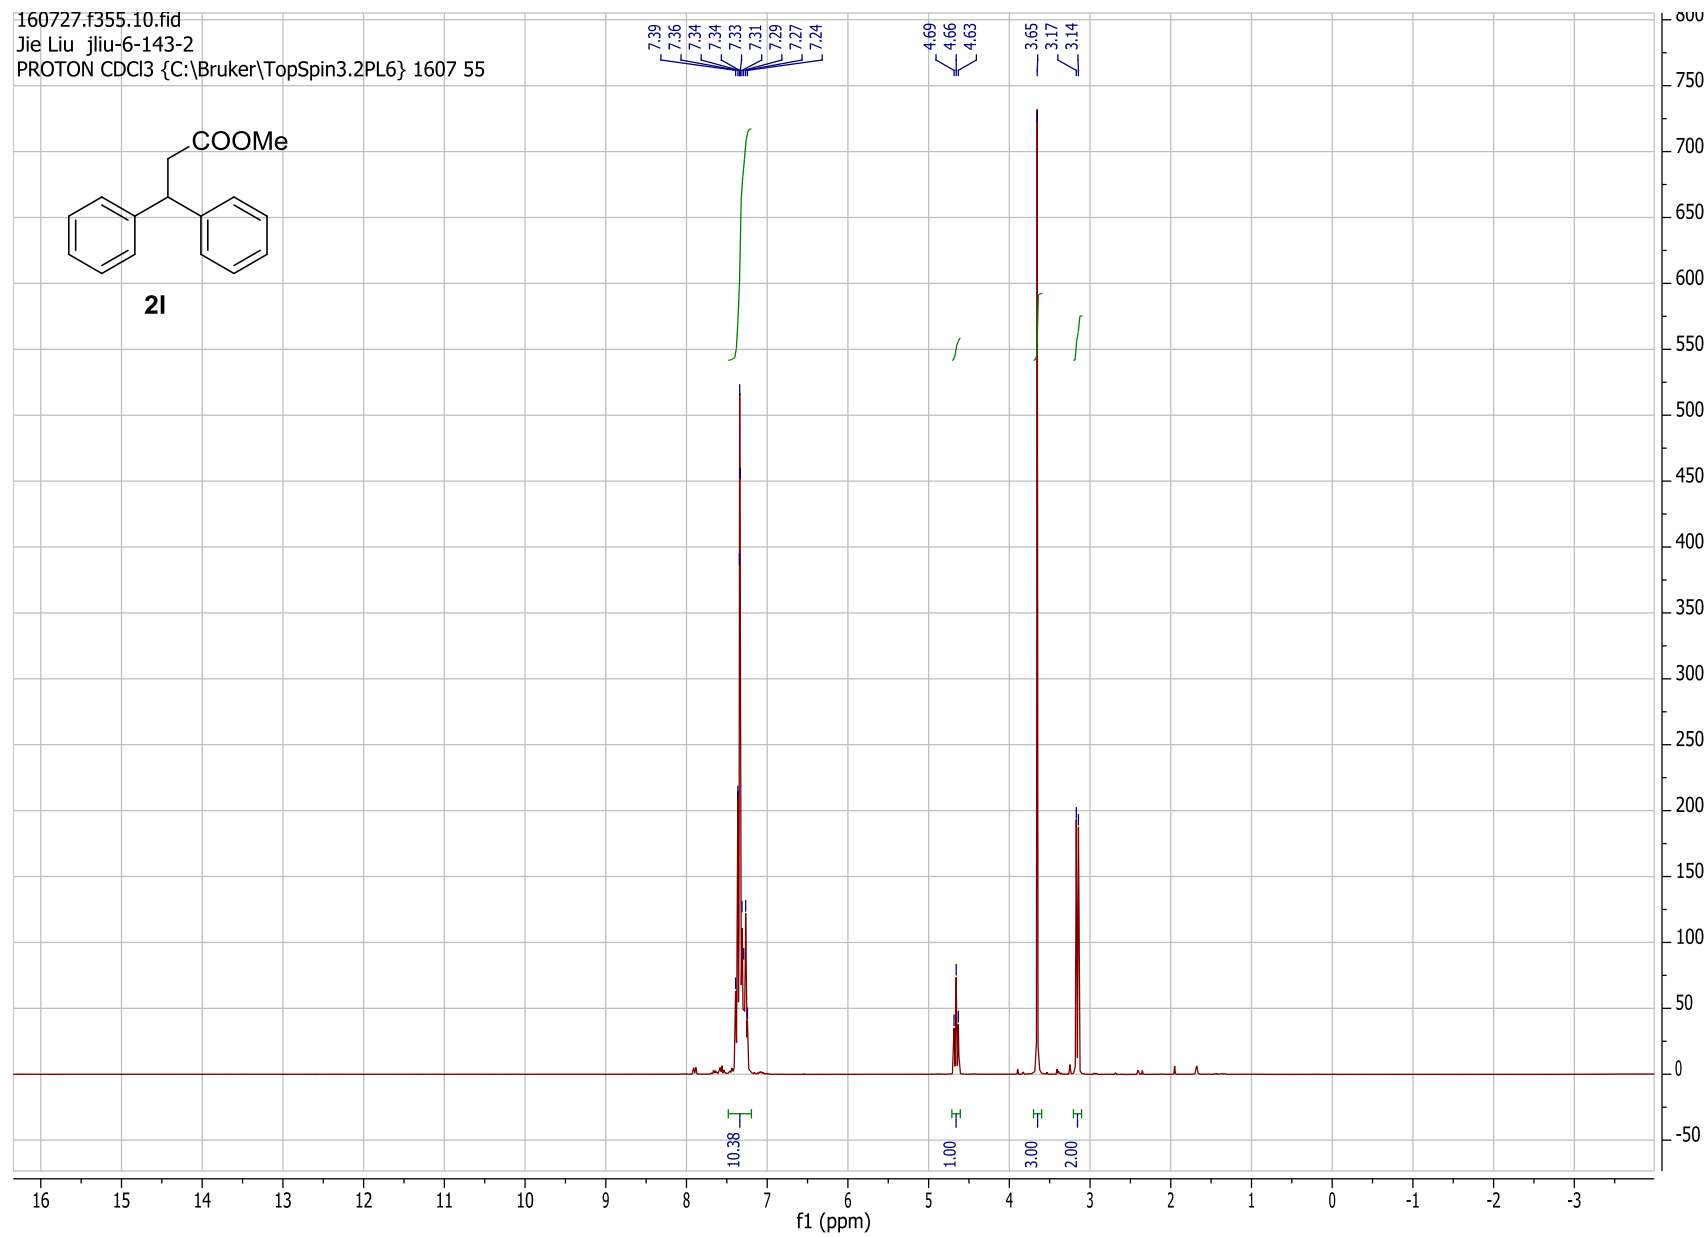

[Type text]

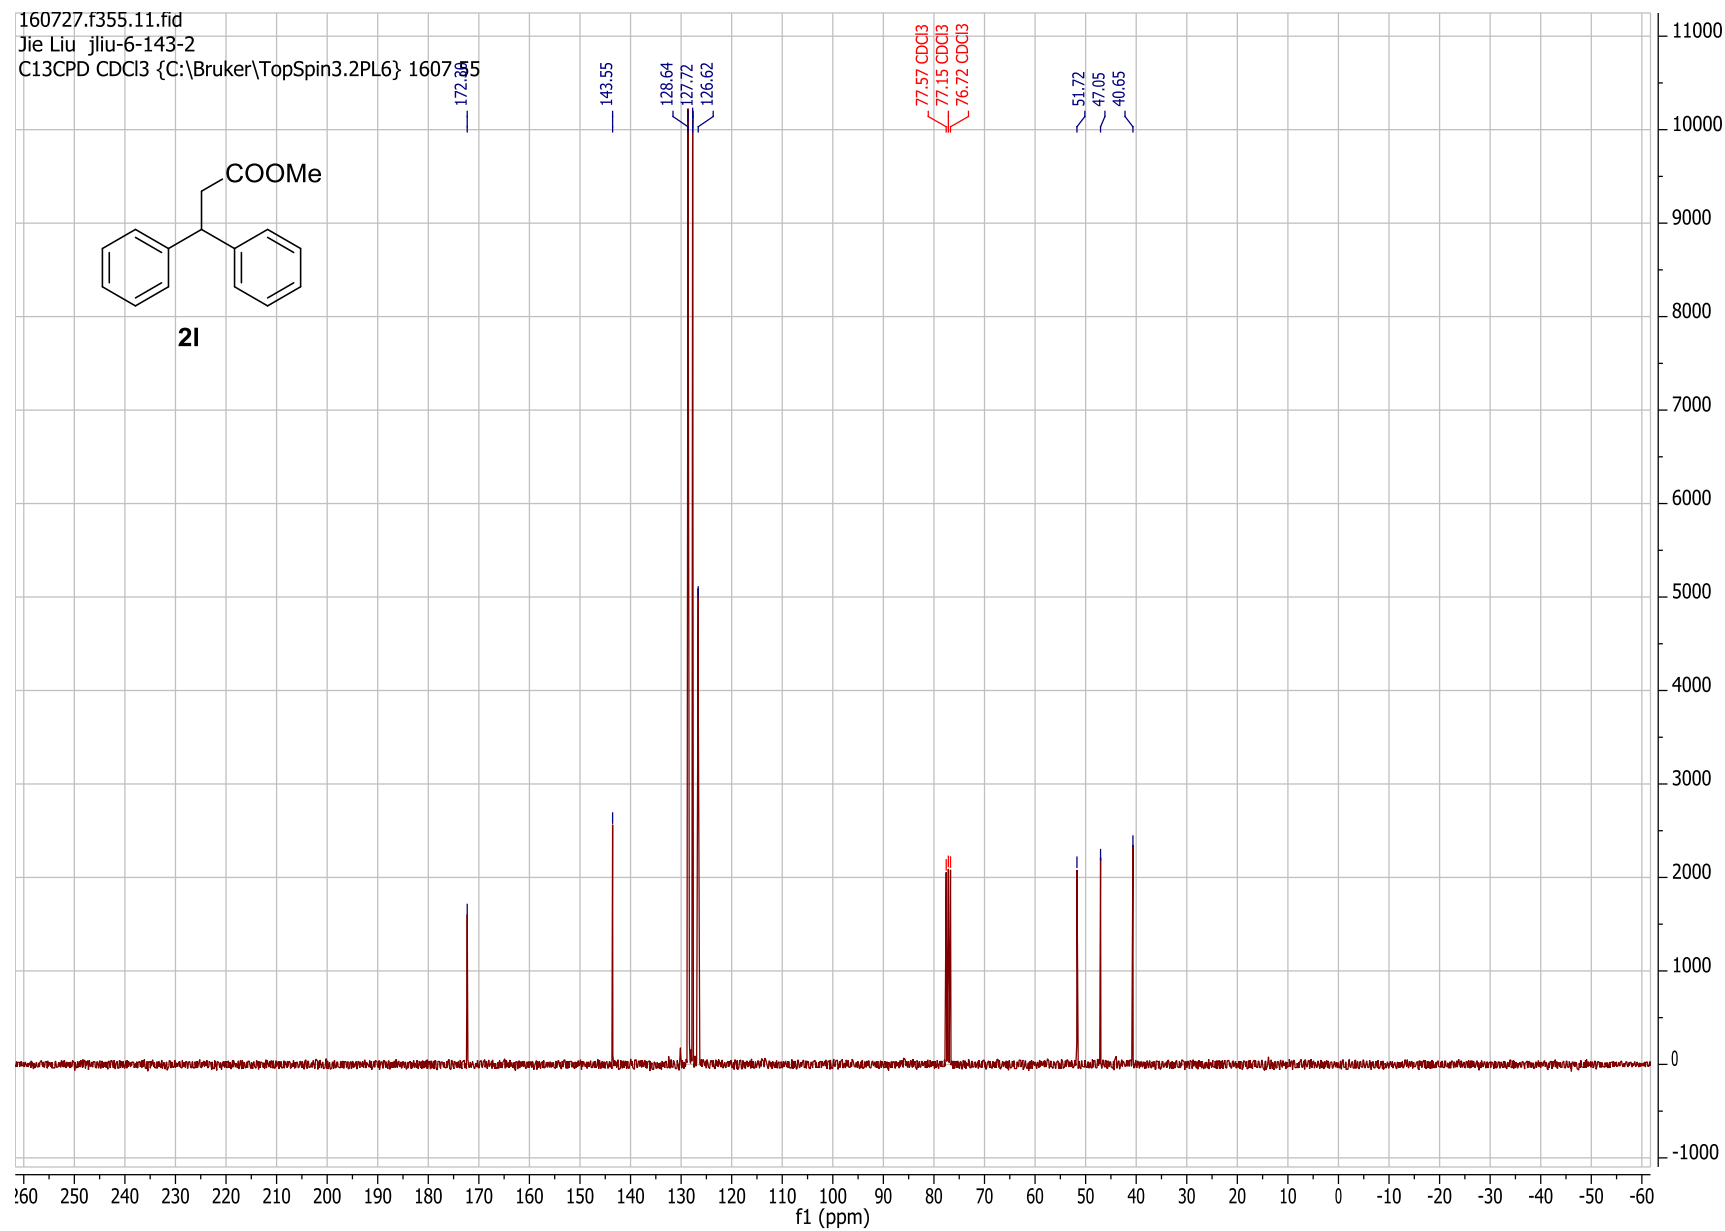



[Type text]

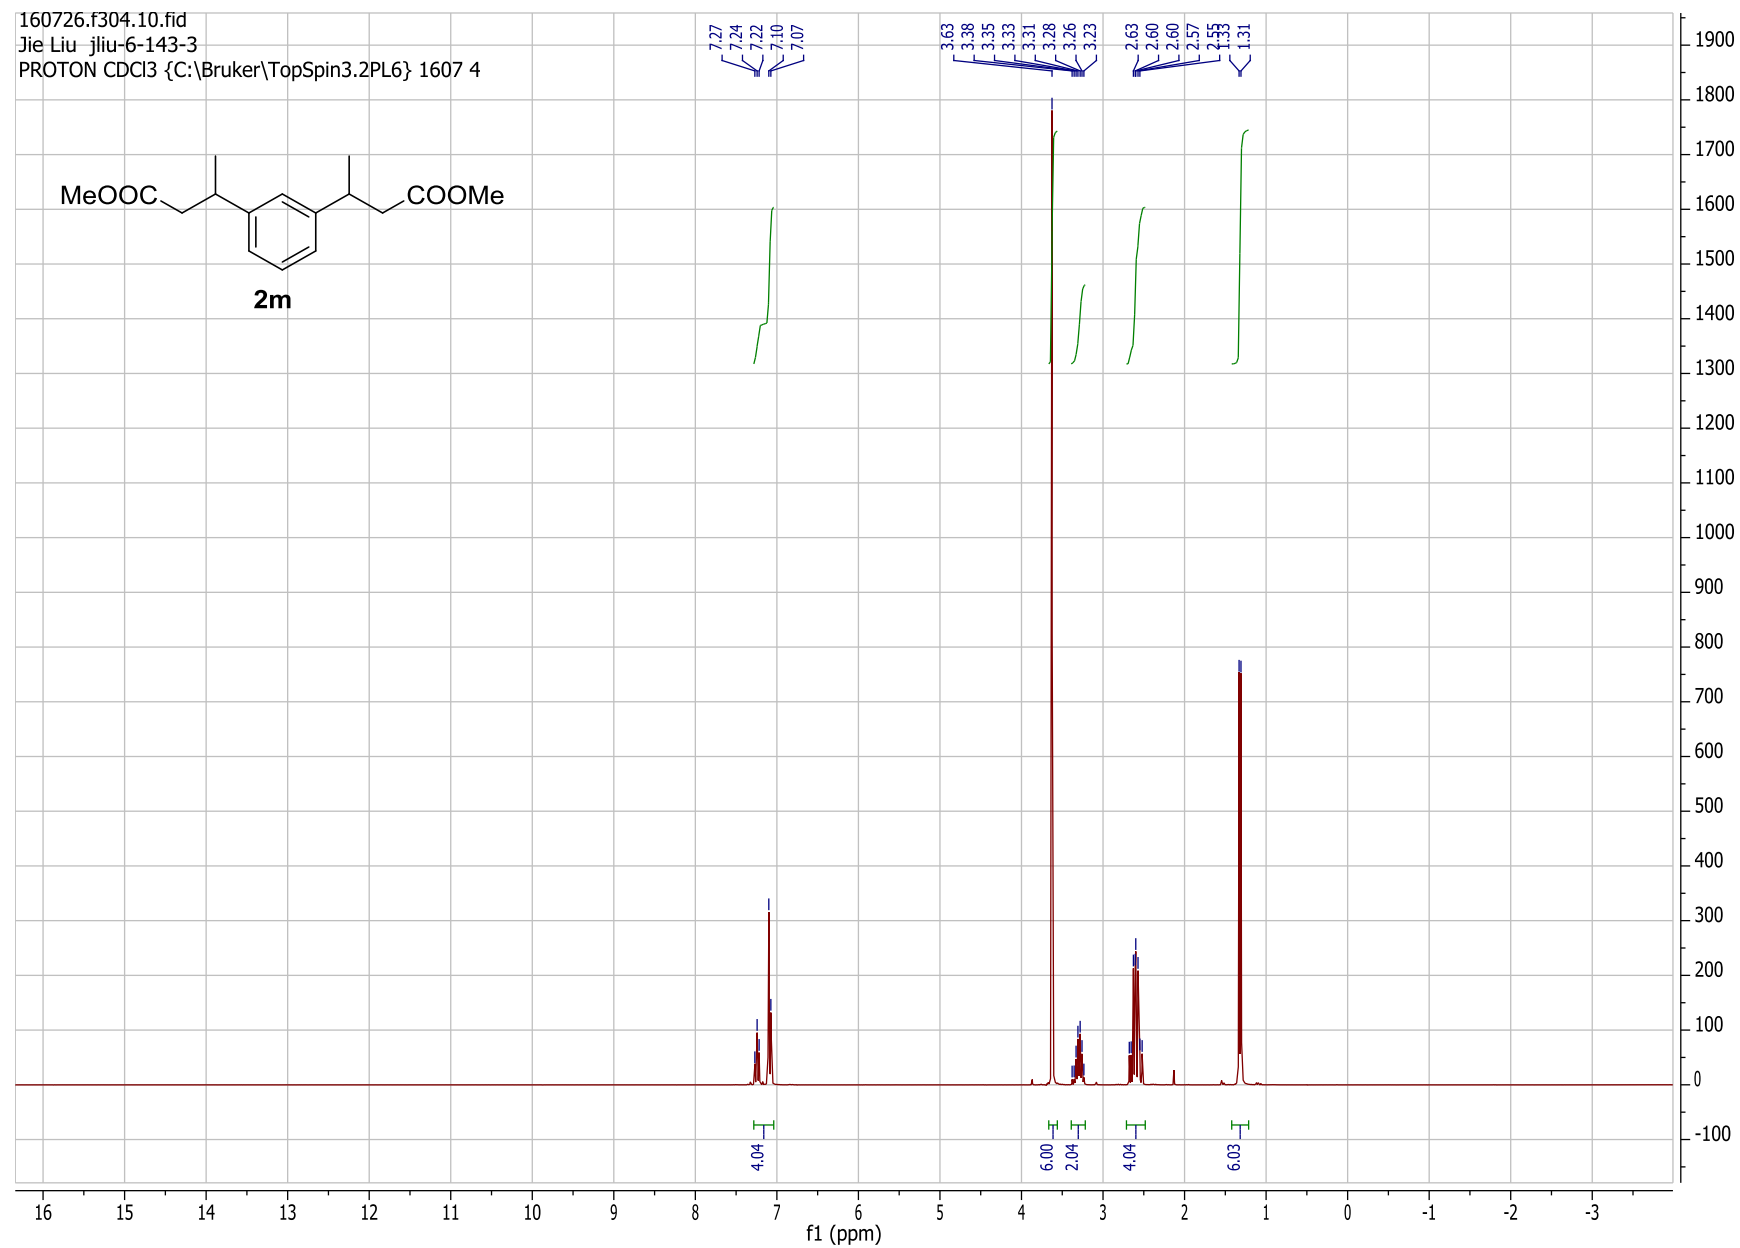

[Type text]

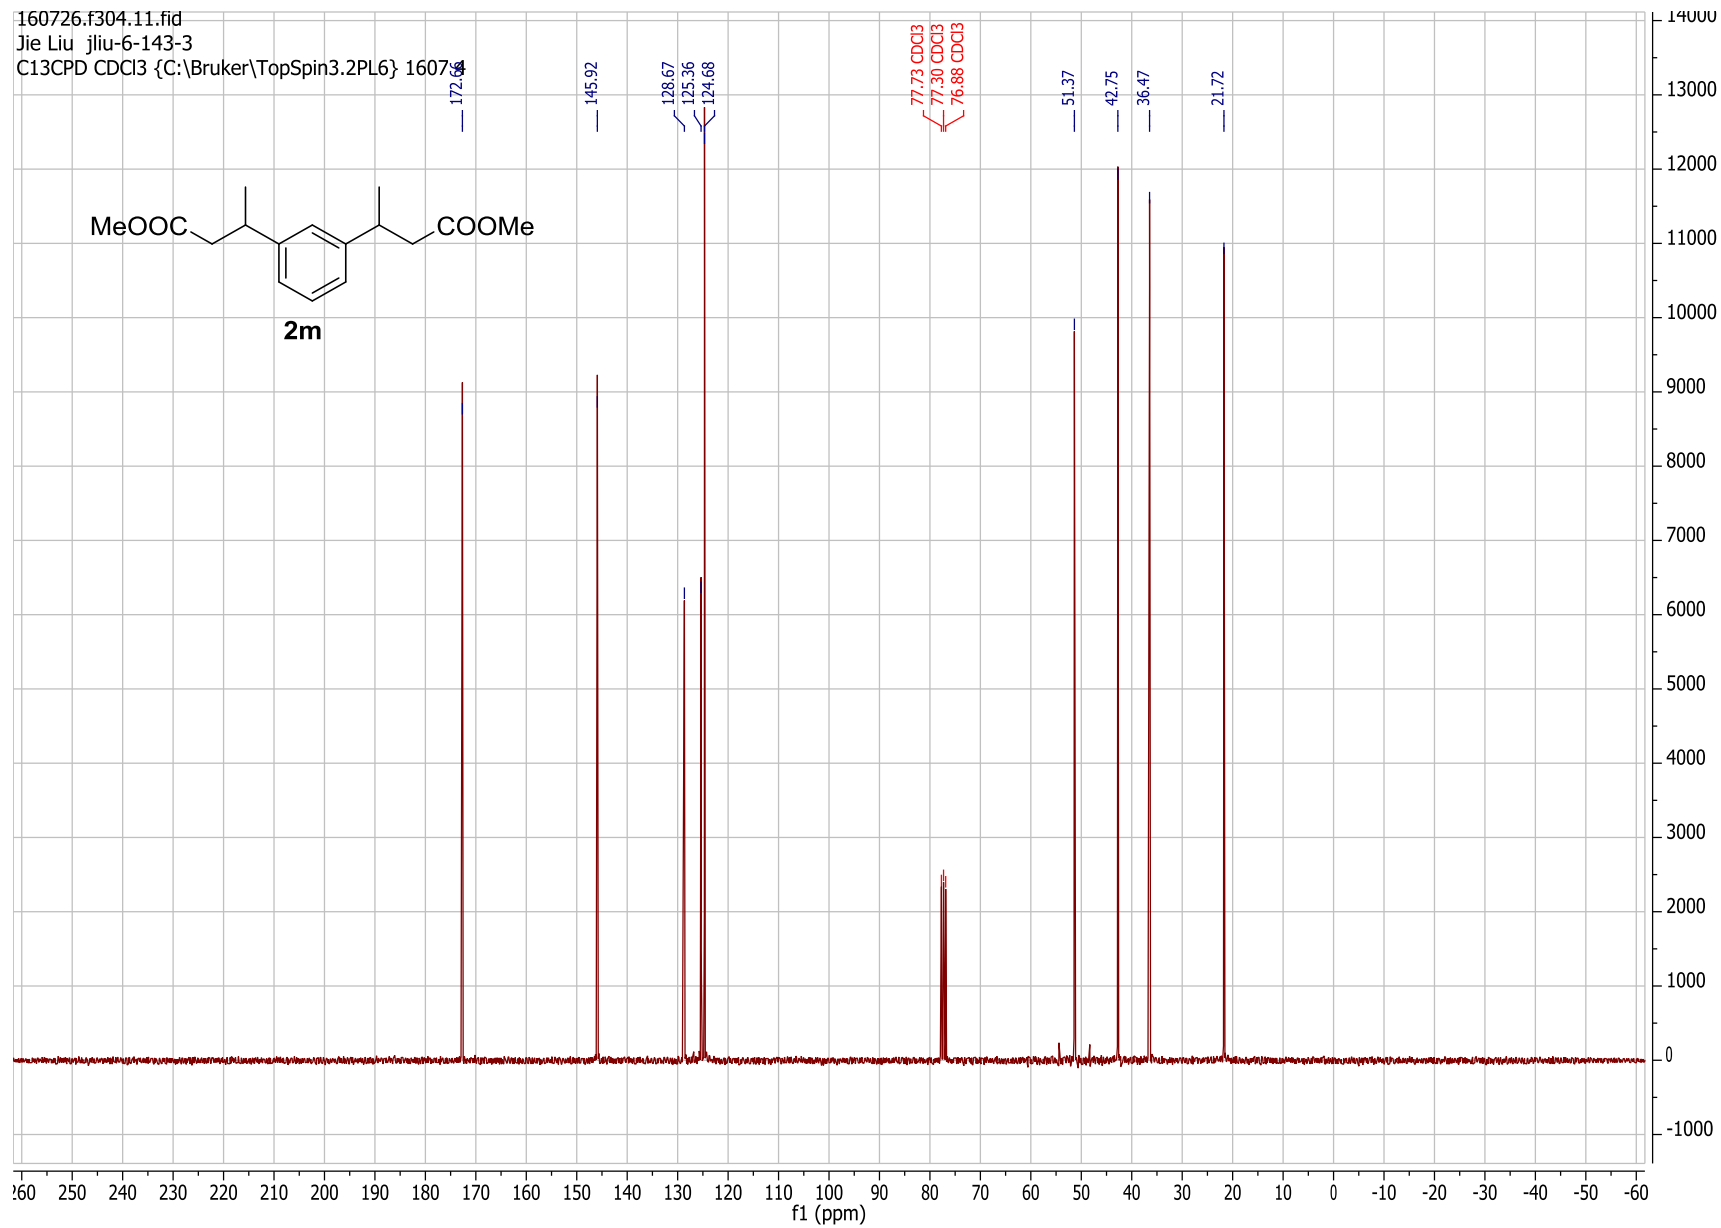

[Type text]

160721.f304.10.fid  
Jie Liu jliu-6-133-2  
PROTON CDCl3 {C:\Bruker\TopSpin3.2PL6} 1607 4

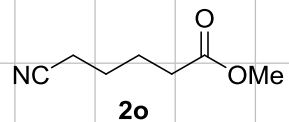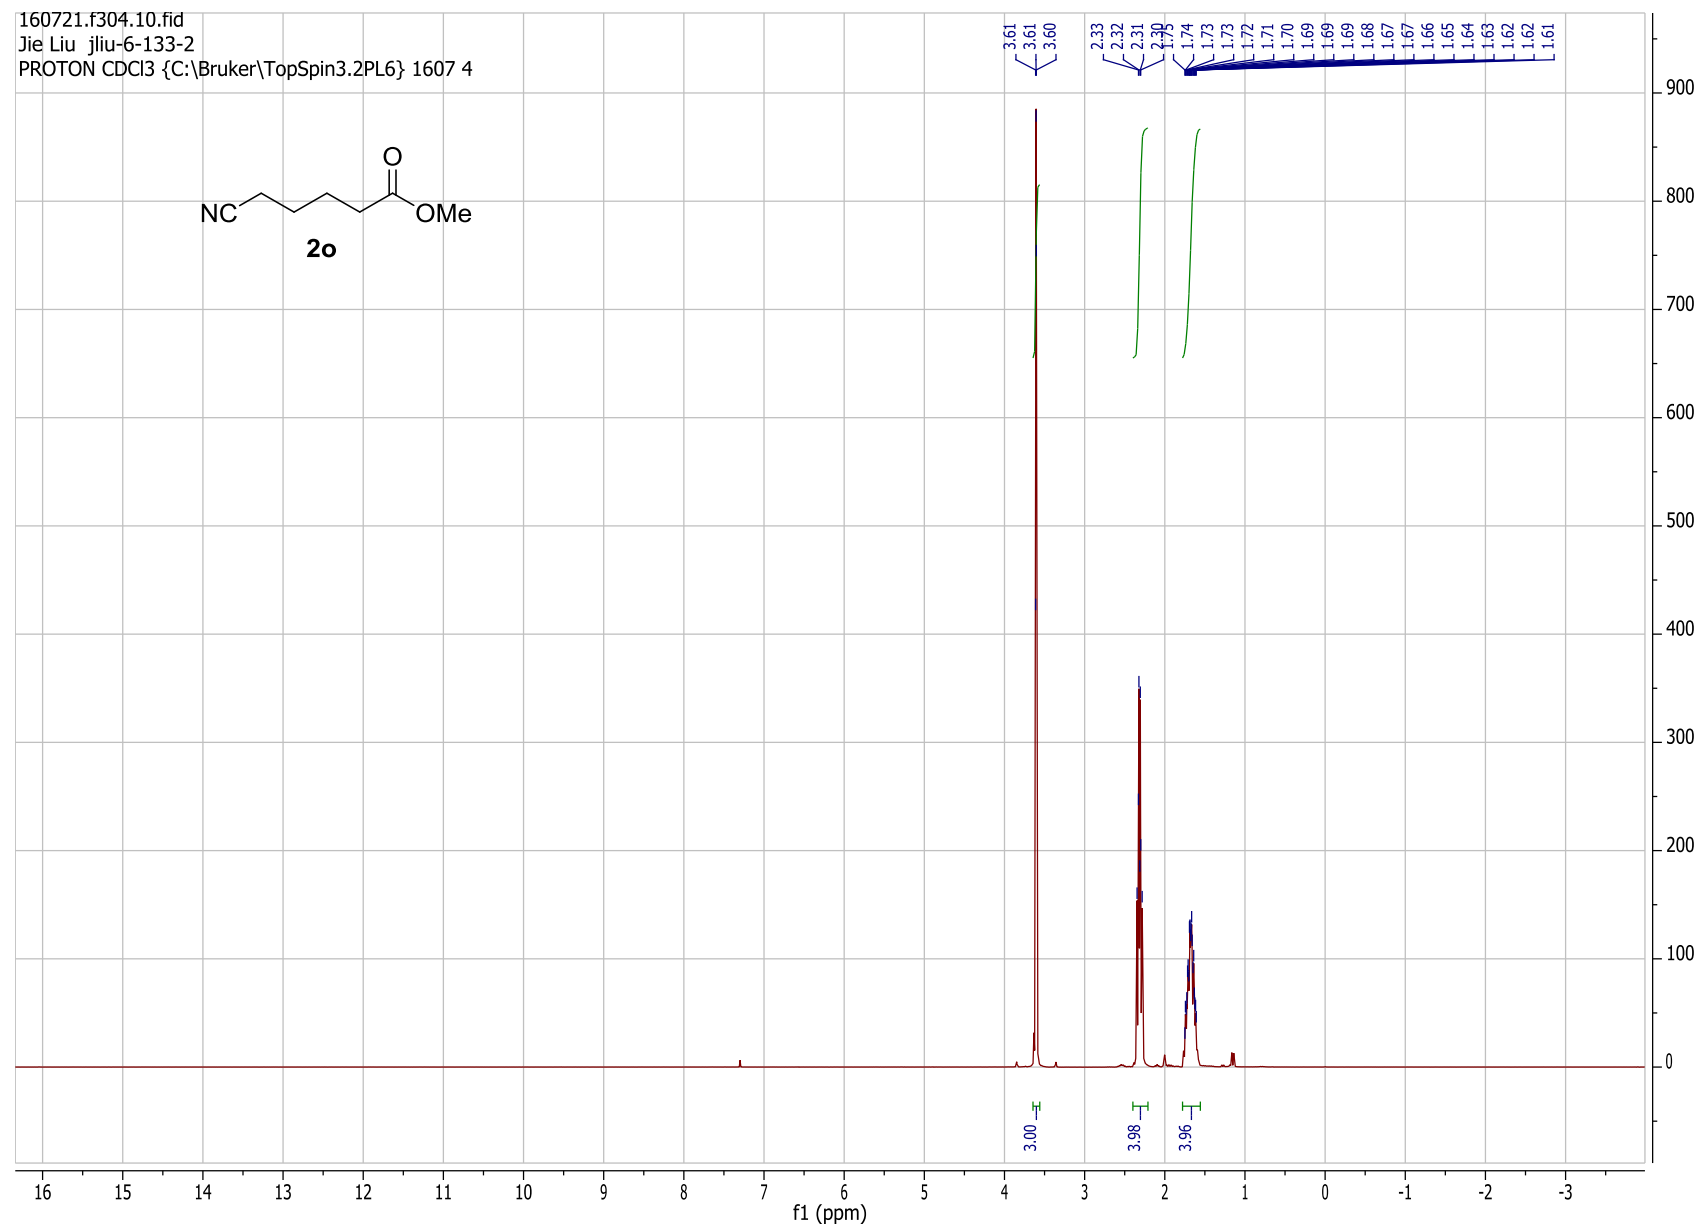

[Type text]

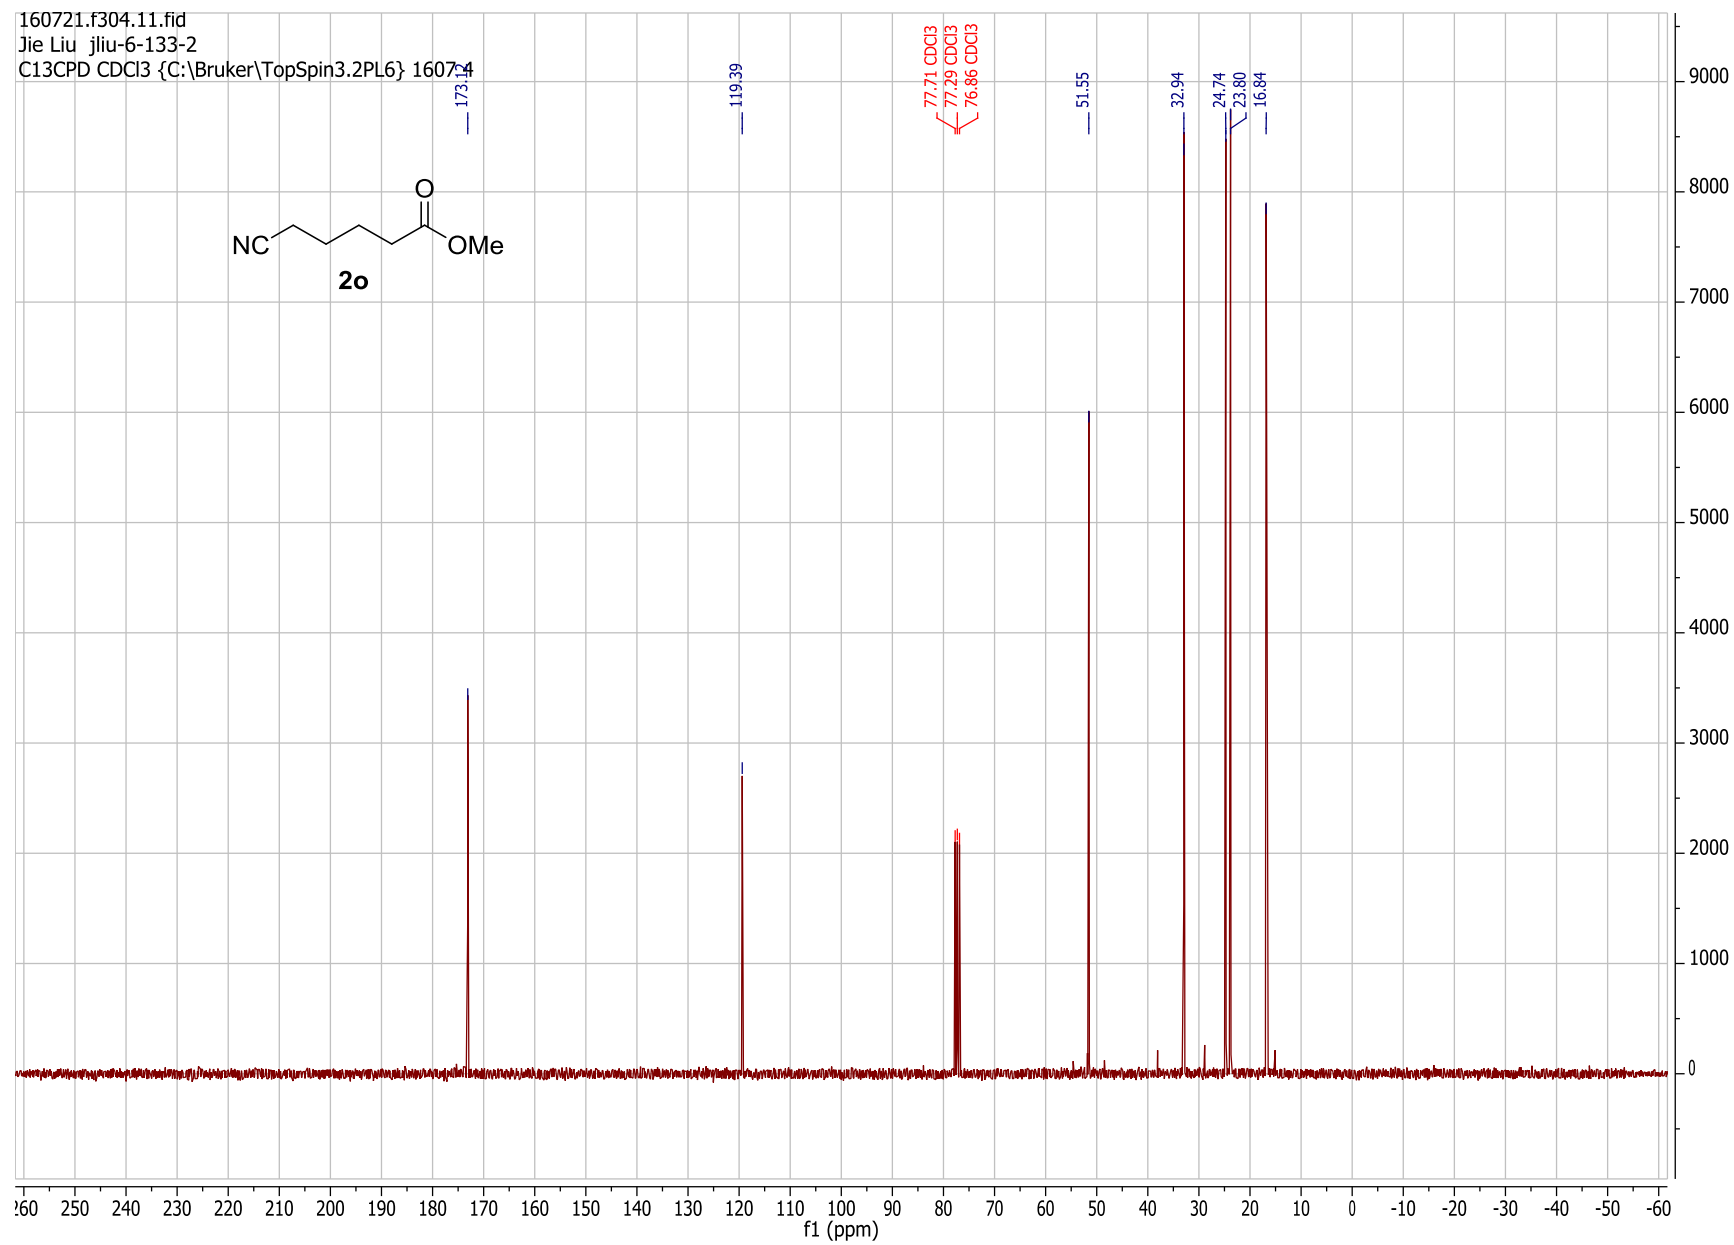

[Type text]

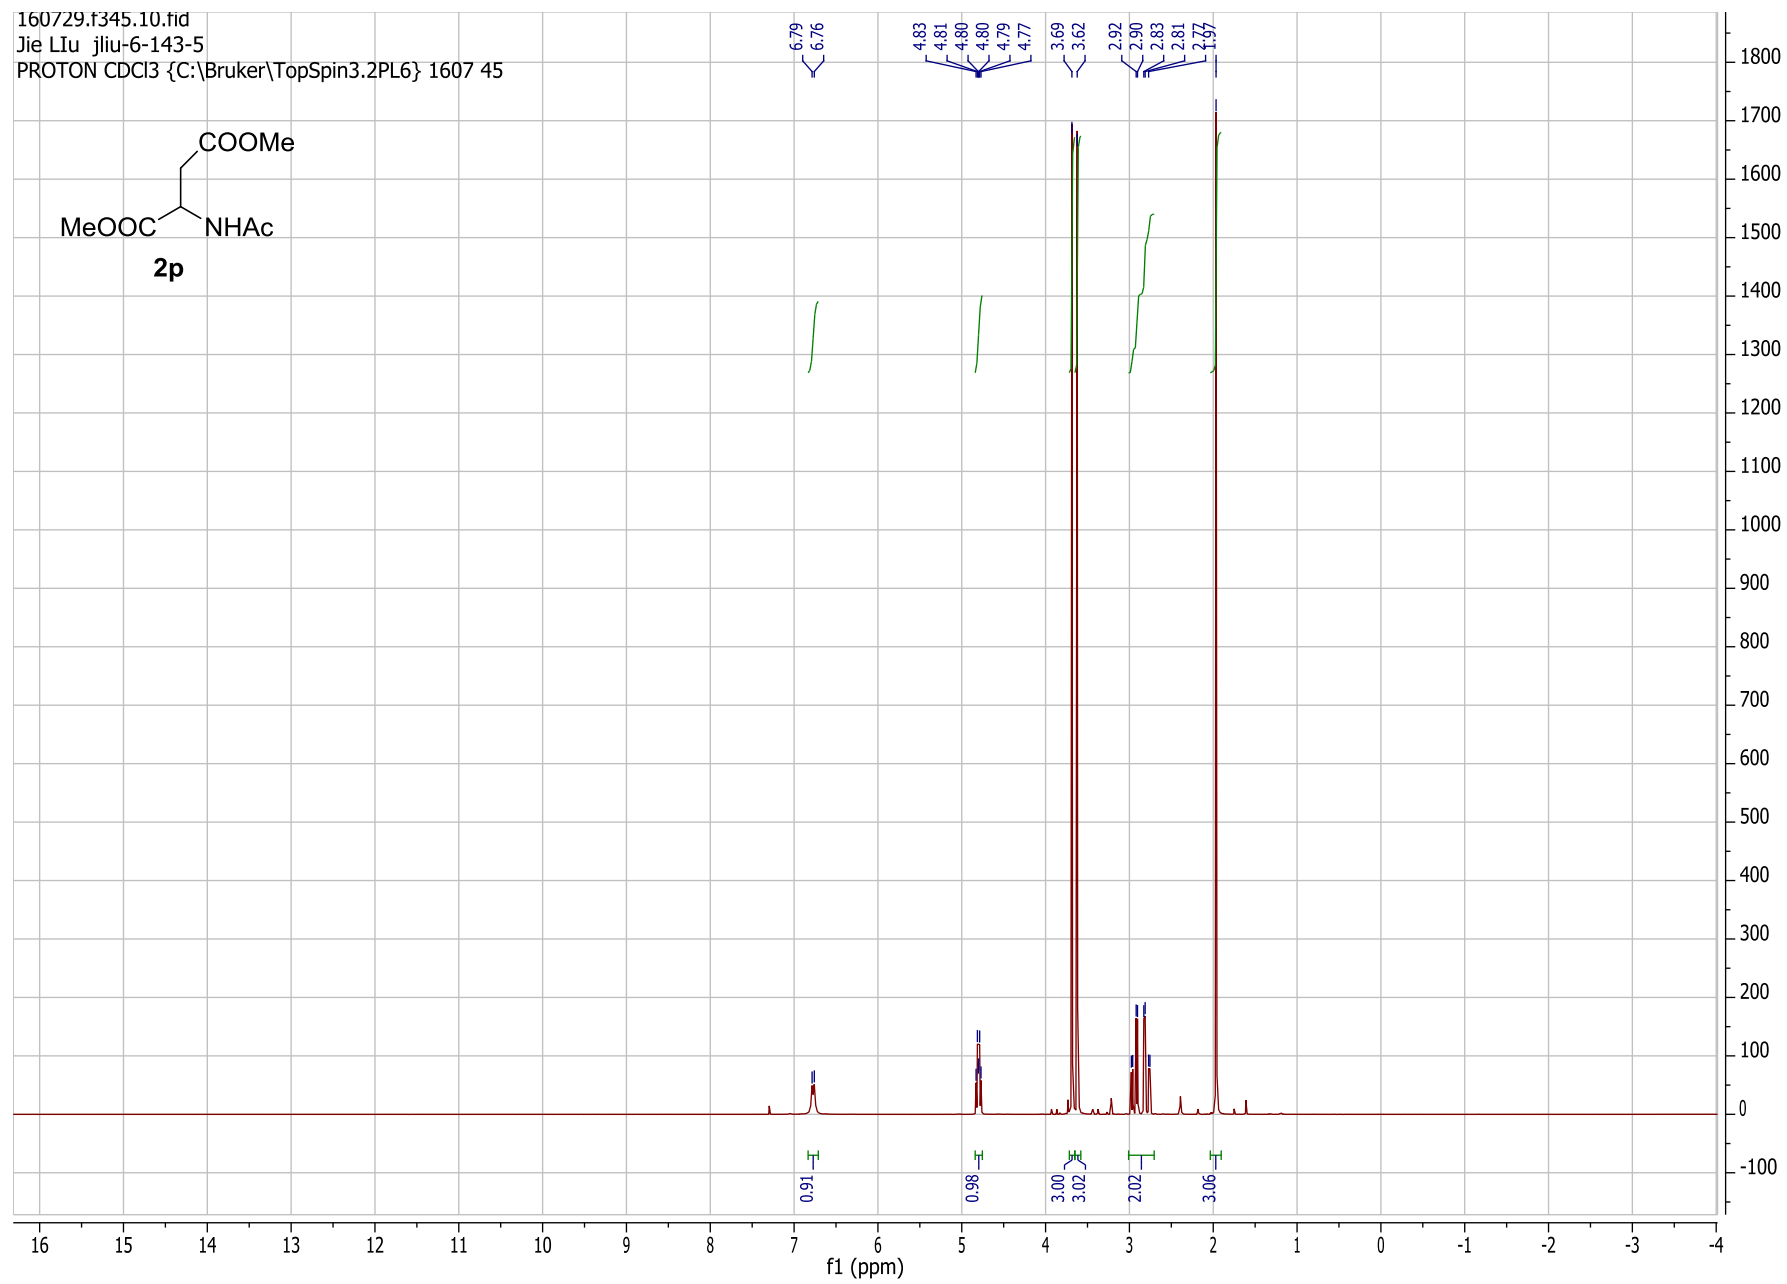

[Type text]

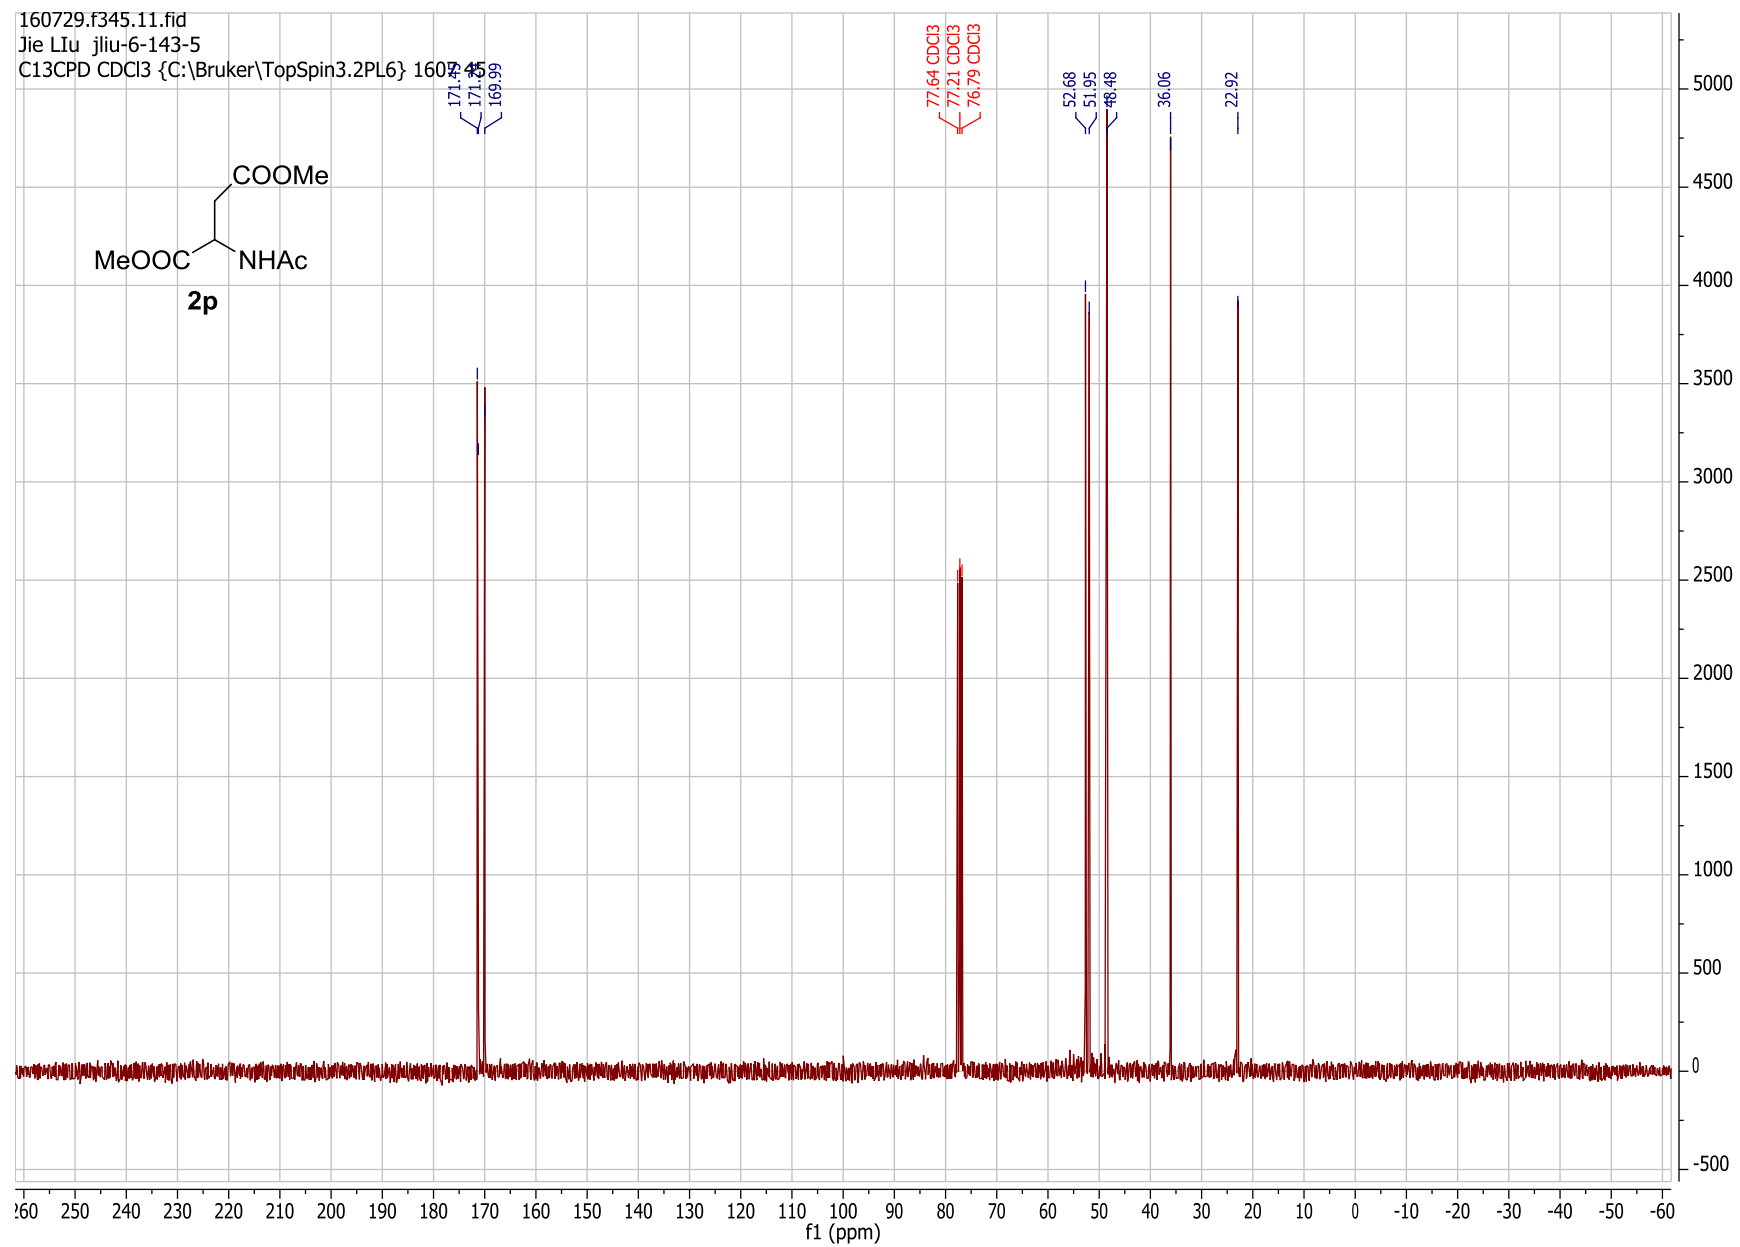

Supplement: c7sc02964k1.pdf [file c7sc02964k1.pdf]
